# Supplementary material
Source: publisher figshare collection journal article supplement (https://acs.figshare.com/ndownloader/files/23748525)
Supplement: Supplementary file 1 [file 23748525]

## Sheet: SupTable2_MS_Data_S_aureus_Anno
Supporting Table S2. Staphyloccocus aureus proteins detected with at least 2 peptides. The indicated levels of expression are log2 ratios to mean values measured in the exponential growth phase at OD600=0.4 (0 h). The color scale goes from blue to red indicating low to high levels of expression, a fold of 2 was used as the limit.
locus tag	No. Peptides	pan gene symbol	Regulation	Uniprot	TheSEED (Expand)	Protein name (Expand)	GO (biological process)	KEGG Pathway	Non-polarized 0 h	Non-polarized 1 h	Non-polarized 2.5 h	Non-polarized 6.5 h	Polarized 0 h	Polarized 1 h	Polarized 2.5 h	Polarized 6.5 h	p-value comparison	p-value Non-polarized	p-value Polarized	p-value 0 h	p-value 1 h	p-value 2 h	p-value 6.5 h
SAOUHSC_00001	10	dnaA	NA	Q2G2H5	DNA Metabolism / DNA replication / DNA-replication / Chromosomal replication initiator protein DnaA; Cell Division Subsystem including YidCD / Chromosomal replication initiator protein DnaA	Chromosomal replication initiator protein DnaA	DNA replication initiation [GO:0006270]; regulation of DNA replication [GO:0006275]	K02313;	-0.03	0.41	0.51	0.67	0.03	0.49	0.34	0.18	0.277459	0.056152	0.0461072	0.999334	0.990596	0.610959	0.370741
SAOUHSC_00002	17	dnaN	NA	Q2G2H4	DNA Metabolism / DNA replication / DNA-replication / DNA polymerase III beta subunit (EC 2.7.7.7); Cell Division Subsystem including YidCD / DNA polymerase III beta subunit (EC 2.7.7.7)	Beta sliding clamp	DNA replication [GO:0006260]	K02338;	0.02	0.19	0.31	0.73	-0.02	0.05	0.3	0.66	0.690596	0.00886378	3.98e-05	0.999334	0.855431	0.917311	0.8542
SAOUHSC_00004	4	recF	NA	Q2G275	DNA Metabolism / DNA repair / DNA repair, bacterial RecFOR pathway / DNA recombination and repair protein RecF; Cell Division Subsystem including YidCD / DNA recombination and repair protein RecF; Hypothetical Coupled to RecF / DNA recombination and repair protein RecF	DNA replication and repair protein RecF	DNA replication [GO:0006260]; DNA synthesis involved in DNA repair [GO:0000731]; double-strand break repair [GO:0006302]; SOS response [GO:0009432]	K03629;	0.12	-0.02	0.18	0.25	-0.12	0.09	-0.36	-0.23	0.361714	0.0579933	0.364258	0.999334	0.656558	0.628172	0.903706
SAOUHSC_00005	12	gyrB	NA	Q2G274	DNA Metabolism / DNA replication / DNA topoisomerases, Type II, ATP-dependent / DNA gyrase subunit B (EC 5.99.1.3); Virulence, Disease and Defense / Resistance to antibiotics and toxic compounds / Resistance to fluoroquinolones / DNA gyrase subunit B (EC 5.99.1.3); Cell Division Subsystem including YidCD / DNA gyrase subunit B (EC 5.99.1.3)	DNA gyrase subunit B (EC 5.99.1.3)	chromosome segregation [GO:0007059]; DNA-dependent DNA replication [GO:0006261]; DNA topological change [GO:0006265]	K02470;	0.04	0.19	-0.13	0.18	-0.04	0.01	-0.01	0.08	0.553171	0.253182	0.716959	0.999334	0.840656	0.676451	0.977138
SAOUHSC_00006	25	gyrA	NA	Q2G2Q0	DNA Metabolism / DNA replication / DNA topoisomerases, Type II, ATP-dependent / DNA gyrase subunit A (EC 5.99.1.3); Virulence, Disease and Defense / Resistance to antibiotics and toxic compounds / Resistance to fluoroquinolones / DNA gyrase subunit A (EC 5.99.1.3); Cell Division Subsystem including YidCD / DNA gyrase subunit A (EC 5.99.1.3)	DNA gyrase subunit A (EC 5.99.1.3)	DNA topological change [GO:0006265]; response to antibiotic [GO:0046677]	K02469;	-0.04	0.03	0.01	-0.12	0.04	0.03	-0.08	-0.08	0.414974	0.407661	0.217747	0.999334	0.938878	0.341469	0.845659
SAOUHSC_00009	24	serS	NA	P95689	Amino Acids and Derivatives / Alanine, serine, and glycine / Glycine and Serine Utilization / Seryl-tRNA synthetase (EC 6.1.1.11); Protein Metabolism / Protein biosynthesis / tRNA aminoacylation, Ser / Seryl-tRNA synthetase (EC 6.1.1.11)	Serine--tRNA ligase (EC 6.1.1.11) (Seryl-tRNA synthetase) (SerRS) (Seryl-tRNA(Ser/Sec) synthetase)	selenocysteinyl-tRNA(Sec) biosynthetic process [GO:0097056]; seryl-tRNA aminoacylation [GO:0006434]	K01875;	-0.02	-0.16	-0.06	1	0.02	0.1	0.04	0.99	0.354268	0.000108088	7.59e-06	0.999334	0.362795	0.828436	0.938848
SAOUHSC_00015	7	-	NA	Q2G2T6	CBSS-262719.3.peg.410 / Phosphoesterase, DHH family protein	Cyclic-di-AMP phosphodiesterase (EC 3.1.4.-)			0.06	-0.14	-0.13	0.27	-0.06	0.01	-0.21	0.14	0.840279	0.0264094	0.375926	0.999334	0.892407	0.989518	0.910615
SAOUHSC_00017	7	rplI	NA	Q2G2T3	Protein Metabolism / Protein biosynthesis / Ribosome LSU bacterial / LSU ribosomal protein L9p; CBSS-262719.3.peg.410 / LSU ribosomal protein L9p	50S ribosomal protein L9	translation [GO:0006412]	K02939;	-0.03	0.08	-0.44	-0.68	0.03	0.23	-0.48	-0.84	0.516071	0.0094495	1.76e-05	0.999334	0.990596	0.69911	0.61828
SAOUHSC_00018	10	dnaC	NA	Q2G1S4	CBSS-262719.3.peg.410 / Replicative DNA helicase (DnaB) (EC 3.6.4.12); DNA-replication / Replicative DNA helicase (DnaB) (EC 3.6.4.12)	Replicative DNA helicase (EC 3.6.4.12)	DNA replication, synthesis of RNA primer [GO:0006269]; DNA unwinding involved in DNA replication [GO:0006268]	K02314;	-0.01	0.15	0.06	0.37	0.01	0.15	-0.1	0.14	0.405747	0.186006	0.0354151	0.999334	0.967533	0.452072	0.801035
SAOUHSC_00019	25	purA	NA	Q2G1S3	Miscellaneous / Miscellaneous - no subcategory / EC 6.3.4.- Ligases that form carbon-nitrogen bonds / Adenylosuccinate synthetase (EC 6.3.4.4); Nucleosides and Nucleotides / Purines / Purine conversions / Adenylosuccinate synthetase (EC 6.3.4.4); CBSS-262719.3.peg.410 / Adenylosuccinate synthetase (EC 6.3.4.4)	Adenylosuccinate synthetase (AMPSase) (AdSS) (EC 6.3.4.4) (IMP--aspartate ligase)	'de novo' AMP biosynthetic process [GO:0044208]; IMP metabolic process [GO:0046040]	K01939;	0.03	0.19	-0.37	-0.62	-0.03	-0.14	-0.52	-0.67	0.405359	0.00118915	0.000501299	0.999334	0.33811	0.877115	0.997385
SAOUHSC_00020	11	walR	Rex	Q2G2U6	Iron acquisition and metabolism / Iron acquisition and metabolism - no subcategory / Heme, hemin uptake and utilization systems in GramPositives / Two-component response regulator SA14-24	Transcriptional regulatory protein WalR	phosphorelay signal transduction system [GO:0000160]; regulation of transcription, DNA-templated [GO:0006355]; transcription, DNA-templated [GO:0006351]	K07668;	-0.01	-0.21	-0.06	0.56	0.01	0.23	0.04	0.66	0.277459	0.0357836	0.00414111	0.999334	0.324236	0.967386	0.977138
SAOUHSC_00022	4	walH	NA	Q2G2U3	Cofactors, Vitamins, Prosthetic Groups, Pigments / Tetrapyrroles / CPO analysis / FIG011501: YycH protein	Uncharacterized protein			-0.03	-0.21	-0.13	0.34	0.03	0	-1.1	0.28	0.0277406	0.146091	0.000303514	0.999334	0.71178	0.107818	0.889158
SAOUHSC_00023	3	walI	NA	Q2G2U2	Cofactors, Vitamins, Prosthetic Groups, Pigments / Tetrapyrroles / CPO analysis / hypothetical protein SA_21	Uncharacterized protein			-0.11	0	-0.22	-0.18	0.11	0.03	-0.55	-1.14	0.978783	0.473901	0.0400238	0.999334	0.990596	0.935553	0.924306
SAOUHSC_00027	4	orfX	NA	Q2G252	Ribosome biogenesis bacterial / 23S rRNA (pseudouridine(1915)-N(3))-methyltransferase (EC 2.1.1.177)	Ribosomal RNA large subunit methyltransferase H (EC 2.1.1.177) (23S rRNA (pseudouridine1915-N3)-methyltransferase) (23S rRNA m3Psi1915 methyltransferase) (rRNA (pseudouridine-N3-)-methyltransferase RlmH)	rRNA processing [GO:0006364]	K00783;	0.08	-0.56	-0.03	-0.5	-0.08	-0.1	-0.06	-0.61	0.240625	0.0132244	0.0137696	0.999334	0.215451	0.634983	0.998554
SAOUHSC_00039	3	-	SigB	Q2G1R3	RNA Metabolism / RNA processing and modification / tRNA modification Archaea / tRNA dihydrouridine synthase B (EC 1.-.-.-)	tRNA-dihydrouridine synthase (EC 1.3.1.-)			-0.04	0.53	-0.1	0.2	0.04	0.31	-0.26	-0.04	0.64181	0.523812	0.443932	0.999334	0.778267	0.497548	0.910615
SAOUHSC_00060	6	-	NA	Q2G1P4	Phosphorus Metabolism / Phosphorus Metabolism - no subcategory / Phosphate metabolism / Na/Pi cotransporter II-related protein	Uncharacterized protein		K03324;	0	0.37	0.16	0.41	0	0.55	0.19	0.55	0.962327	0.0147097	0.0265584	0.999334	0.990596	0.889098	0.990801
SAOUHSC_00069	17	spa	AgrA/RNAIII , SarA neg , Agr/rot	P02976	Virulence, Disease and Defense / Adhesion / Adhesins in Staphylococcus / Protein A, von Willebrand factor binding protein Spa	Immunoglobulin G-binding protein A (IgG-binding protein A) (Staphylococcal protein A)	pathogenesis [GO:0009405]	K14196;	-0.41	-0.9	-1.84	-4.01	0.41	0.49	-2.24	-3.72	0.526586	5.19e-05	8.57e-05	0.999334	0.944311	0.536706	0.924306
SAOUHSC_00070	3	sarS	NA	Q2G1N7	staphylococcal accessory regulator A homologue	HTH-type transcriptional regulator SarS (Staphylococcal accessory regulator S)	pathogenesis [GO:0009405]; regulation of transcription, DNA-templated [GO:0006355]; transcription, DNA-templated [GO:0006351]		-0.11	-0.64	-0.1	-1.11	0.11	-0.19	-0.28	-1.09	0.602035	0.000582559	0.00116937	0.999334	0.840656	0.702701	0.978326
SAOUHSC_00074	7	sirA	Fur	Q2G1N4	Iron acquisition and metabolism / Siderophores / Siderophore Staphylobactin / Siderophore staphylobactin ABC transporter, substrate-binding protein SirA	Periplasmic binding protein, putative		K02016;	-0.1	1.67	1.24	0.9	0.1	2.23	1.01	0.73	0.277459	0.00333019	3.92e-05	0.999334	0.990596	0.39043	0.433651
SAOUHSC_00076	4	sbnB	Fur	Q2G1N2	Arginine and Ornithine Degradation / Ornithine cyclodeaminase (EC 4.3.1.12) / Siderophore staphylobactin biosynthesis protein SbnB; Proline, 4-hydroxyproline uptake and utilization / Ornithine cyclodeaminase (EC 4.3.1.12) / Siderophore staphylobactin biosynthesis protein SbnB; Siderophore Staphylobactin / Ornithine cyclodeaminase (EC 4.3.1.12) / Siderophore staphylobactin biosynthesis protein Sbn…	Ornithine cyclodeaminase, putative (EC 4.3.1.12)	arginine catabolic process [GO:0006527]	K21721;	-0.32	4.34	3.28	3.21	0.32	3.78	2.49	3.43	0.206004	0.000271563	0.000707664	0.829775	0.225734	0.197102	0.704662
SAOUHSC_00086	7	butA	CodY	Q2G1M1	Acetoin, butanediol metabolism / 2,3-butanediol dehydrogenase, S-alcohol forming, (R)-acetoin-specific (EC 1.1.1.4) / Acetoin (diacetyl) reductase (EC 1.1.1.304)	3-ketoacyl-acyl carrier protein reductase, putative (EC 1.1.1.100)	acetoin catabolic process [GO:0045150]	K03366;	-0.04	-0.69	2.4	3.28	0.04	0.4	2.26	3.11	0.0005134	1.05e-06	3.84e-08	0.999334	0.00170257	0.993574	0.730213
SAOUHSC_00093	2	sodM	CodY	Q2G261	Stress Response / Oxidative stress / Oxidative stress / Superoxide dismutase [Fe] (EC 1.15.1.1); Stress Response / Oxidative stress / Oxidative stress / Superoxide dismutase [Mn] (EC 1.15.1.1); Stress Response / Oxidative stress / Protection from Reactive Oxygen Species / Superoxide dismutase [Fe] (EC 1.15.1.1); Nitric oxide synthase / Superoxide dismutase [Fe] (EC 1.15.1.1)	Superoxide dismutase [Mn/Fe] 2 (EC 1.15.1.1)		K04564;	0.03	0.47	1.05	0.22	-0.03	0.7	-0.17	0.3	0.277459	0.0773789	0.264335	0.999334	0.923073	0.395072	0.947117
SAOUHSC_00100	9	deoC1	NA	Q2G224	Carbohydrates / Monosaccharides / Deoxyribose and Deoxynucleoside Catabolism / Deoxyribose-phosphate aldolase (EC 4.1.2.4)	Deoxyribose-phosphate aldolase (DERA) (EC 4.1.2.4) (2-deoxy-D-ribose 5-phosphate aldolase) (Phosphodeoxyriboaldolase) (Deoxyriboaldolase)	carbohydrate catabolic process [GO:0016052]; deoxyribonucleotide catabolic process [GO:0009264]; deoxyribose phosphate catabolic process [GO:0046386]	K01619;	-0.04	-0.13	-0.01	0.19	0.04	-0.07	0.2	0.29	0.975429	0.0212099	0.00491708	0.999334	0.938878	0.990387	0.988658
SAOUHSC_00101	9	deoB	NA	Q2G227	Carbohydrates / Monosaccharides / Deoxyribose and Deoxynucleoside Catabolism / Phosphopentomutase (EC 5.4.2.7)	Phosphopentomutase (EC 5.4.2.7) (Phosphodeoxyribomutase)	5-phosphoribose 1-diphosphate biosynthetic process [GO:0006015]; cellular metabolic compound salvage [GO:0043094]; nucleotide metabolic process [GO:0009117]	K01839;	-0.01	-0.07	0.19	0.02	0.01	0.15	-0.43	-0.19	0.488636	0.401798	0.260417	0.999334	0.990596	0.46714	0.75337
SAOUHSC_00113	2	adhE	Rex	Q2G1K9	Carbohydrates / Central carbohydrate metabolism / Pyruvate metabolism II: acetyl-CoA, acetogenesis from pyruvate / Acetaldehyde dehydrogenase (EC 1.2.1.10); Carbohydrates / Fermentation / Fermentations: Lactate / Acetaldehyde dehydrogenase (EC 1.2.1.10); Carbohydrates / Fermentation / Fermentations: Lactate / Alcohol dehydrogenase (EC 1.1.1.1); Carbohydrates / Fermentation / Fermentations: Mixed …	Aldehyde-alcohol dehydrogenase	alcohol metabolic process [GO:0006066]; carbon utilization [GO:0015976]	K04072;	0.67	0.21	3.09	3.42	-0.67	3.69	3.57	4.53	0.1189	0.00934087	0.000241366	0.999334	0.0512701	0.39043	0.488701
SAOUHSC_00130	5	isdI	NA	Q2G1J2	Heme, hemin uptake and utilization systems in GramPositives / Heme-degrading monooxygenase, staphylobilin-producing (EC 1.14.99.48)	Heme oxygenase (staphylobilin-producing) 2 (EC 1.14.99.48) (Heme-degrading monooxygenase 2) (Iron-regulated surface determinant 2) (Iron-responsive surface determinant 2)	iron assimilation [GO:0033212]	K07145;	0.1	0.96	1.36	1.79	-0.1	1.27	1.38	1.47	0.242556	7.03e-05	6.14e-05	0.999334	0.225769	0.801422	0.979773
SAOUHSC_00144	3	ausA	NA	Q2G1H9	Cofactors, Vitamins, Prosthetic Groups, Pigments / Biotin / Biotin biosynthesis / Long-chain-fatty-acid--CoA ligase (EC 6.2.1.3)	Uncharacterized protein	metabolic process [GO:0008152]		0.13	-0.28	3.82	4.6	-0.13	1.23	3.58	4.67	0.805979	0.00154398	9.74e-05	0.999334	0.923073	0.830327	0.934847
SAOUHSC_00153	4	-	NA	Q2G1H0	Carbohydrates / Central carbohydrate metabolism / Pyruvate metabolism II: acetyl-CoA, acetogenesis from pyruvate / Pyruvate decarboxylase (EC 4.1.1.1); Pyruvate metabolism II: acetyl-CoA, acetogenesis from pyruvate / Alpha-keto-acid decarboxylase (EC 4.1.1.-)	Indolepyruvate decarboxylase, putative			0.05	0.13	0.56	-1.19	-0.05	0.04	-0.62	-2.49	0.240625	0.00591183	0.000264914	0.999334	0.980924	0.281801	0.437044
SAOUHSC_00155	8	glcA	NA	Q2G1G8	Trehalose Uptake and Utilization / PTS system, glucose-specific IIC component / PTS system, glucose-specific IIB component (EC 2.7.1.69) / PTS system, glucose-specific IIA component	PTS system glucose-specific EIICBA component (EC 2.7.1.199) (EIICBA-Glc) (EII-Glc) (EIICBA-Glc 1) [Includes: Glucose permease IIC component (PTS system glucose-specific EIIC component); Glucose-specific phosphotransferase enzyme IIB component (PTS system glucose-specific EIIB component); Glucose-specific phosphotransferase enzyme IIA component (PTS system glucose-specific EIIA component)]	phosphoenolpyruvate-dependent sugar phosphotransferase system [GO:0009401]	K20116;K20117;K20118;	-0.01	0.62	0.48	0.61	0.01	0.43	0.31	0.52	0.863579	0.0145693	0.0268225	0.999334	0.834203	0.777918	0.982294
SAOUHSC_00162	7	hsdR	NA	Q2G1G2	DNA Metabolism / DNA Metabolism - no subcategory / Restriction-Modification System / Type I restriction-modification system, restriction subunit R (EC 3.1.21.3); DNA Metabolism / DNA Metabolism - no subcategory / Type I Restriction-Modification / Type I restriction-modification system, restriction subunit R (EC 3.1.21.3)	Type I restriction enzyme R Protein (EC 3.1.21.3)	DNA restriction-modification system [GO:0009307]	K01153;	-0.07	-0.37	-0.3	-1.02	0.07	0.35	-0.27	-1.5	0.507984	0.00841632	0.0106474	0.999334	0.662796	0.855552	0.890796
SAOUHSC_00173	5	azoR	NA	Q2G1F2	FMN-dependent NADH-azoreductase (EC 1.7.1.6)	FMN-dependent NADH-azoreductase (EC 1.7.-.-) (Azo-dye reductase) (FMN-dependent NADH-azo compound oxidoreductase)		K01118;	-0.06	-0.27	-0.17	-1.23	0.06	-0.3	-0.52	-1.12	0.275938	0.00136882	3.02e-05	0.999334	0.75343	0.40959	0.889158
SAOUHSC_00187	22	pflB	Rex	Q2G1D8	Carbohydrates / Fermentation / Butanol Biosynthesis / Pyruvate formate-lyase (EC 2.3.1.54); Carbohydrates / Fermentation / Fermentations: Mixed acid / Pyruvate formate-lyase (EC 2.3.1.54); Respiration / Respiration - no subcategory / Formate hydrogenase / Pyruvate formate-lyase (EC 2.3.1.54)	Formate acetyltransferase (EC 2.3.1.54) (Pyruvate formate-lyase)	glucose metabolic process [GO:0006006]; threonine catabolic process [GO:0006567]	K00656;	-0.39	1.38	1.63	5.93	0.39	4.49	3.88	6.15	0.0361545	0.000690087	7.33e-07	0.999334	0.0436077	0.835835	0.910615
SAOUHSC_00195	5	fadA	NA	Q2G1D0	Amino Acids and Derivatives / Branched-chain amino acids / Isoleucine degradation / 3-ketoacyl-CoA thiolase (EC 2.3.1.16); Carbohydrates / One-carbon Metabolism / Serine-glyoxylate cycle / 3-ketoacyl-CoA thiolase (EC 2.3.1.16); Cofactors, Vitamins, Prosthetic Groups, Pigments / Biotin / Biotin biosynthesis / 3-ketoacyl-CoA thiolase (EC 2.3.1.16); Fatty Acids, Lipids, and Isoprenoids / Fatty Acids…	Acetyl-CoA acetyltransferase, putative	metabolic process [GO:0008152]	K00632;	0.05	-0.19	4.03	3.8	-0.05	-0.59	4.23	4.3	0.203711	2.2e-05	1.74e-07	0.999334	0.517793	0.894727	0.582556
SAOUHSC_00196	27	fadB	NA	Q2G1C9	Acetyl-CoA fermentation to Butyrate / Enoyl-CoA hydratase (EC 4.2.1.17) / Enoyl-CoA hydratase [valine degradation] (EC 4.2.1.17) / 3-hydroxyacyl-CoA dehydrogenase (EC 1.1.1.35); Butanol Biosynthesis / Enoyl-CoA hydratase (EC 4.2.1.17) / Enoyl-CoA hydratase [valine degradation] (EC 4.2.1.17) / 3-hydroxyacyl-CoA dehydrogenase (EC 1.1.1.35); Butyrate metabolism cluster / Enoyl-CoA hydratase (EC 4.2.…	Uncharacterized protein	fatty acid beta-oxidation [GO:0006635]	K07516;	-0.02	-0.22	4.58	4.56	0.02	-0.14	5.11	5.39	0.316773	5.56e-06	3.04e-09	0.999334	0.990596	0.799074	0.378752
SAOUHSC_00197	12	fadD	NA	Q2G1C8	Acyl-CoA dehydrogenase, long-chain specific (EC 1.3.8.8)	Uncharacterized protein		K00252;	-0.14	-0.08	5.73	5.72	0.14	-0.04	6.28	6.26	0.286684	2.7e-06	8.24e-11	0.999334	0.990596	0.495144	0.413946
SAOUHSC_00198	8	fadE	NA	Q2G1C7	Cofactors, Vitamins, Prosthetic Groups, Pigments / Biotin / Biotin biosynthesis / Long-chain-fatty-acid--CoA ligase (EC 6.2.1.3)	Uncharacterized protein	metabolic process [GO:0008152]	K01897;	0.17	0.15	4.59	4.38	-0.17	0.28	4.98	5.02	0.240294	8.34e-06	1.49e-08	0.999334	0.820235	0.62595	0.24979
SAOUHSC_00199	2	fadX	NA	Q2G1C6	FIG01108629: hypothetical protein	Uncharacterized protein	ketone body catabolic process [GO:0046952]		0.22	-0.11	3.16	2.3	-0.22	-1.31	2.01	2.19	0.705148	0.0224306	0.000707664	0.999334	0.990596	0.61133	0.996537
SAOUHSC_00200	2	prsS	NA	Q2G1C5	FIG01108038: hypothetical protein	Membrane protein, putative			0.04	0.49	0.16	0.44	-0.04	0.58	-2.41	-1.36	0.0111651	0.118378	0.000484932	0.999334	0.990596	0.0334916	0.180316
SAOUHSC_00201	5	opp-5A	NA	Q2G2P5	Membrane Transport / ABC transporters / ABC transporter oligopeptide (TC 3.A.1.5.1) / Oligopeptide ABC transporter, periplasmic oligopeptide-binding protein OppA (TC 3.A.1.5.1); Regulation and Cell signaling / Regulation and Cell signaling - no subcategory / Sex pheromones in Enterococcus faecalis and other Firmicutes / Oligopeptide ABC transporter, periplasmic oligopeptide-binding protein OppA (…	Uncharacterized protein	transmembrane transport [GO:0055085]	K02035;	-0.31	-0.3	-0.27	1.08	0.31	-0.23	-0.67	0.85	0.487624	0.0245763	0.0036845	0.999334	0.767732	0.37558	0.746225
SAOUHSC_00204	10	hmp	Rex	Q2G2P2	Stress Response / Oxidative stress / Glutaredoxins / Flavohemoprotein (Hemoglobin-like protein) (Flavohemoglobin) (Nitric oxide dioxygenase) (EC 1.14.12.17); Stress Response / Stress Response - no subcategory / Bacterial hemoglobins / Flavohemoprotein (Hemoglobin-like protein) (Flavohemoglobin) (Nitric oxide dioxygenase) (EC 1.14.12.17); Stress Response / Stress Response - no subcategory / Flavoh…	Globin domain protein	cellular response to nitrosative stress [GO:0071500]; nitric oxide catabolic process [GO:0046210]	K05916;	-0.54	0.04	-0.26	1.5	0.54	1.98	1.44	2.13	0.252534	0.0029189	0.0207366	0.763142	0.376634	0.901545	0.876207
SAOUHSC_00206	14	ldh1	Rex	Q2G218	Carbohydrates / Fermentation / Fermentations: Lactate / L-lactate dehydrogenase (EC 1.1.1.27); Carbohydrates / Fermentation / Fermentations: Mixed acid / L-lactate dehydrogenase (EC 1.1.1.27)	L-lactate dehydrogenase 1 (L-LDH 1) (EC 1.1.1.27)	carbohydrate metabolic process [GO:0005975]; carboxylic acid metabolic process [GO:0019752]	K00016;	0.22	0.21	1.21	4.17	-0.22	5.83	5.36	5.6	0.0189992	0.010855	0.000132262	0.999334	0.00623327	0.329816	0.621228
SAOUHSC_00211	3	-	NA	Q2G217	Nucleosides and Nucleotides / Purines / Purine conversions / Inosine-uridine preferring nucleoside hydrolase (EC 3.2.2.1); RNA Metabolism / RNA processing and modification / Queuosine-Archaeosine Biosynthesis / Inosine-uridine preferring nucleoside hydrolase (EC 3.2.2.1)	Uncharacterized protein	purine nucleoside catabolic process [GO:0006152]		0.04	0.11	-0.02	0.96	-0.04	-0.4	0.27	1.09	0.532078	0.0853626	0.00908676	0.999334	0.990596	0.495144	0.900145
SAOUHSC_00220	4	tarI'	NA	Q2G2C4	Cell Wall and Capsule / Gram-Positive cell wall components / Teichoic and lipoteichoic acids biosynthesis / 2-C-methyl-D-erythritol 4-phosphate cytidylyltransferase (EC 2.7.7.60); Fatty Acids, Lipids, and Isoprenoids / Isoprenoids / Isoprenoid Biosynthesis / 2-C-methyl-D-erythritol 4-phosphate cytidylyltransferase (EC 2.7.7.60)	Ribitol-5-phosphate cytidylyltransferase 2 (EC 2.7.7.40)	cell wall organization [GO:0071555]; isoprenoid biosynthetic process [GO:0008299]; teichoic acid biosynthetic process [GO:0019350]	K21030;	-0.48	1.37	1.87	2.68	0.48	1.67	2.22	2.99	0.226482	0.000684475	0.00140809	0.104912	0.225769	0.229553	0.381218
SAOUHSC_00222	13	tarL'	NA	Q2G1C2	Cell Wall and Capsule / Gram-Positive cell wall components / Teichoic and lipoteichoic acids biosynthesis / Putative polyribitolphosphotransferase	Teichoic acid ribitol-phosphate polymerase TarK (EC 2.7.8.14) (Poly(ribitol phosphate) polymerase TarK) (Ribitol-phosphate polymerase TarK) (Tar polymerase TarK)	cell wall organization [GO:0071555]; teichoic acid biosynthetic process [GO:0019350]	K18704;	0.05	0.29	0.41	0.73	-0.05	0.59	0.54	0.77	0.266941	0.00185637	0.00123864	0.999334	0.159626	0.697548	0.891338
SAOUHSC_00223	5	tarF	NA	Q2G1C1	Cell Wall and Capsule / Gram-Positive cell wall components / Teichoic and lipoteichoic acids biosynthesis / CDP-ribitol:poly(ribitol phosphate) ribitol phosphotransferase	Teichoic acid glycerol-phosphate transferase (EC 2.7.8.45)	cell wall organization [GO:0071555]; teichoic acid biosynthetic process [GO:0019350]	K21591;	-0.08	-0.04	-0.24	0.13	0.08	-0.06	-1.49	-0.19	0.391128	0.183441	0.0695779	0.999334	0.990596	0.352712	0.890313
SAOUHSC_00225	11	tarI	NA	Q2G1C0	Cell Wall and Capsule / Gram-Positive cell wall components / Teichoic and lipoteichoic acids biosynthesis / 2-C-methyl-D-erythritol 4-phosphate cytidylyltransferase (EC 2.7.7.60); Fatty Acids, Lipids, and Isoprenoids / Isoprenoids / Isoprenoid Biosynthesis / 2-C-methyl-D-erythritol 4-phosphate cytidylyltransferase (EC 2.7.7.60)	Ribitol-5-phosphate cytidylyltransferase 1 (EC 2.7.7.40)	cell wall organization [GO:0071555]; isoprenoid biosynthetic process [GO:0008299]; teichoic acid biosynthetic process [GO:0019350]	K21030;	0.01	-0.14	0.08	0.51	-0.01	-0.14	-0.09	0.41	0.666993	0.0222629	0.00269659	0.999334	0.914815	0.735302	0.890796
SAOUHSC_00226	7	tarJ	NA	Q2G1B9	Xylitol dehydrogenase	Ribulose-5-phosphate reductase 1 (Ribulose-5-P reductase 1) (EC 1.1.1.405) (Ribitol-5-phosphate dehydrogenase 1)	cell wall organization [GO:0071555]; teichoic acid biosynthetic process [GO:0019350]	K05352;	-0.02	-0.21	0.06	0.45	0.02	-0.09	-0.1	0.5	0.289337	0.00250931	0.00235793	0.999334	0.855431	0.40959	0.997378
SAOUHSC_00227	9	tarL	NA	Q2G1B8	Teichoic and lipoteichoic acids biosynthesis / CDP-ribitol ribitolphosphotransferase (EC 2.7.8.14)	Teichoic acid ribitol-phosphate polymerase TarL (EC 2.7.8.14) (Poly(ribitol phosphate) polymerase TarL) (Ribitol-phosphate polymerase TarL) (Tar polymerase TarL)	cell wall organization [GO:0071555]; teichoic acid biosynthetic process [GO:0019350]	K18704;	0.05	0.12	-0.12	0.37	-0.05	0.17	-0.38	0.12	0.552345	0.0898465	0.0678579	0.999334	0.990596	0.475399	0.801035
SAOUHSC_00228	13	tarS	NA	Q2G1B7	Glycosyl transferase family protein, putative	Uncharacterized protein		K22708;	-0.03	-0.11	-0.14	-0.15	0.03	0.07	-0.35	-0.09	0.11231	0.186006	0.00105014	0.999334	0.606837	0.275169	0.993333
SAOUHSC_00229	3	scdA	NA	P72360	Nitrogen Metabolism / Nitrogen Metabolism - no subcategory / Nitrosative stress / Nitric oxide-dependent regulator DnrN or NorA; Stress Response / Stress Response - no subcategory / Flavohaemoglobin / Nitric oxide-dependent regulator DnrN or NorA	Iron-sulfur cluster repair protein ScdA (Cell wall-related protein ScdA)	protein repair [GO:0030091]; response to oxidative stress [GO:0006979]	K07322;	-0.51	0.27	0.03	1.45	0.51	1.4	0.8	1.74	0.448459	0.000626405	0.00864731	0.581151	0.767732	0.967866	0.71512
SAOUHSC_00231	2	lytR	NA	P60611	Regulation and Cell signaling / Programmed Cell Death and Toxin-antitoxin Systems / Murein hydrolase regulation and cell death / Autolysis response regulater LytR	Sensory transduction protein LytR	phosphorelay signal transduction system [GO:0000160]; regulation of transcription, DNA-templated [GO:0006355]; transcription, DNA-templated [GO:0006351]	K07705;	-0.07	0.17	-0.05	0.82	0.07	0.51	-1.32	0.46	0.00263775	0.00639731	4.08e-05	0.999334	0.986176	0.00606868	0.320577
SAOUHSC_00248	2	lytM	NA	O33599	Protein Metabolism / Protein degradation / EC 3.4.24.- Metalloendopeptidases / Glycyl-glycine endopeptidase LytM precursor (EC 3.4.24.75)	Glycyl-glycine endopeptidase LytM (EC 3.4.24.75) (Autolysin LytM)	cell wall organization [GO:0071555]; pathogenesis [GO:0009405]; peptide catabolic process [GO:0043171]	K08259;	0.05	-2.57	-3.45	-2.28	-0.05	-1.04	-2.76	-1.76	0.430048	0.00185637	0.00110276	0.999334	0.33811	0.942892	0.77351
SAOUHSC_00253	6	-	NA	Q2G193	FIG01108182: hypothetical protein	Uncharacterized protein			-0.15	0.54	0.39	-0.65	0.15	1.2	-0.5	-0.88	0.0361545	0.00175916	0.000507474	0.999334	0.554948	0.115572	0.801035
SAOUHSC_00257	6	esxA	NA	Q2G189	Membrane Transport / Protein secretion system, Type VII / ESAT-6 proteins secretion system in Firmicutes / 6 kDa early secretory antigenic target ESAT-6 (EsxA)	ESAT-6 secretion system extracellular protein A (Ess extracellular protein A)			-0.09	-0.23	0.67	-0.65	0.09	0.67	1.17	-0.06	0.129603	0.000468233	0.00033868	0.999334	0.101889	0.824385	0.336694
SAOUHSC_00269	3	esaG	NA	Q2G178	Membrane Transport / Protein secretion system, Type VII / ESAT-6 proteins secretion system in Firmicutes / Repetitive hypothetical protein near ESAT cluster, SA0282 homolog	Uncharacterized protein			-0.05	0.09	-0.14	0.14	0.05	0.01	0.51	0.04	0.248065	0.676551	0.104598	0.999334	0.767732	0.467931	0.871723
SAOUHSC_00279	2	-	NA	Q2G174	FIG01108407: hypothetical protein	Uncharacterized protein			-0.07	0.18	-0.7	0.02	0.07	0.72	0.4	-0.16	0.11231	0.0169792	0.00437512	0.999334	0.369273	0.229553	0.891338
SAOUHSC_00285	2	-	SigB	Q2G168	ABC transporter permease protein	Uncharacterized protein		K02004;	-0.04	-2.42	-0.25	-3.55	0.04	-0.45	-0.52	-3.03	0.214892	0.0902781	0.0273901	0.999334	0.405247	0.605778	0.986013
SAOUHSC_00290	3	-	NA	Q2G165	Perfringolysin O regulator protein PfoR	Uncharacterized protein	phosphoenolpyruvate-dependent sugar phosphotransferase system [GO:0009401]		-0.09	-0.62	-5.27	-4.37	0.09	0.18	-3.26	-3.33	0.653728	0.00468266	0.000598386	0.999334	0.887014	0.935553	0.621228
SAOUHSC_00298	2	nanE	NA	Q2G157	Cell Wall and Capsule / Capsular and extracellular polysacchrides / Sialic Acid Metabolism / N-acetylmannosamine-6-phosphate 2-epimerase (EC 5.1.3.9)	Putative N-acetylmannosamine-6-phosphate 2-epimerase (EC 5.1.3.9) (ManNAc-6-P epimerase)	carbohydrate metabolic process [GO:0005975]; N-acetylmannosamine metabolic process [GO:0006051]; N-acetylneuraminate catabolic process [GO:0019262]	K01788;	0.15	0.26	0.28	-4.21	-0.15	0.13	-1.12	-3.36	0.512286	0.0305338	6.14e-05	0.999334	0.964025	0.758051	0.801035
SAOUHSC_00301	4	-	NA	Q2G154	FIG01108623: hypothetical protein	Uncharacterized protein	catabolic process [GO:0009056]		-0.03	-0.03	-0.26	-0.32	0.03	0.16	-0.43	-0.35	0.628292	0.354274	0.0230819	0.999334	0.662796	0.917465	0.967193
SAOUHSC_00308	3	lplA2	NA	Q2G147	Amino Acids and Derivatives / Alanine, serine, and glycine / Glycine cleavage system / Lipoate-protein ligase A; Carbohydrates / Central carbohydrate metabolism / Dehydrogenase complexes / Lipoate-protein ligase A; Cofactors, Vitamins, Prosthetic Groups, Pigments / Lipoic acid / Lipoic acid metabolism / Lipoate-protein ligase A	Lipoate--protein ligase (EC 6.3.1.20)	protein lipoylation [GO:0009249]	K03800;	-0.31	0.9	0.08	0.75	0.31	1.04	0.16	0.66	0.614041	0.0106435	0.037942	0.999334	0.855431	0.623803	0.608795
SAOUHSC_00309	7	-	SigB	Q2G146	FIG01108282: hypothetical protein	Uncharacterized protein	steroid biosynthetic process [GO:0006694]		-0.03	-0.71	-0.03	-0.67	0.03	-0.43	-0.1	-0.84	0.57149	0.010225	0.00120503	0.999334	0.719577	0.828951	0.908535
SAOUHSC_00311	2	-	NA	Q2G144	FIG01108524: hypothetical protein	Uncharacterized protein	phosphoenolpyruvate-dependent sugar phosphotransferase system [GO:0009401]	K02822;	-0.09	0.03	4.29	3.47	0.09	0.19	4.56	3.65	0.973049	0.00282876	5.65e-06	0.999334	0.990596	0.90245	0.986013
SAOUHSC_00319	2	-	SigB	Q2G136	Bacterial luciferase family protein	Uncharacterized protein			0.01	-0.19	-0.04	-0.62	-0.01	-0.13	0.16	-0.7	0.834075	0.0279441	0.0133787	0.999334	0.990596	0.967866	0.801035
SAOUHSC_00333	3	-	NA	Q2G1V4	ABC-type multidrug transport system, ATPase component	ABC transporter, ATP-binding protein, putative		K01990;	-0.01	-0.1	-0.23	-0.29	0.01	0.12	-1	-0.3	0.329123	0.43492	0.0339811	0.999334	0.990596	0.345968	0.970543
SAOUHSC_00334	2	-	NA	Q2G1V6	FIG01107878: hypothetical protein	Uncharacterized protein			-0.12	0.2	0.23	0.25	0.12	0.57	-1.78	-1.17	0.470584	0.193705	0.0840016	0.999334	0.990596	0.467931	0.852929
SAOUHSC_00336	15	-	NA	Q2G124	Amino Acids and Derivatives / Branched-chain amino acids / Isoleucine degradation / 3-ketoacyl-CoA thiolase (EC 2.3.1.16); Carbohydrates / One-carbon Metabolism / Serine-glyoxylate cycle / 3-ketoacyl-CoA thiolase (EC 2.3.1.16); Carbohydrates / Fermentation / Acetyl-CoA fermentation to Butyrate / Acetyl-CoA acetyltransferase (EC 2.3.1.9); Carbohydrates / Fermentation / Butanol Biosynthesis / Acety…	Probable acetyl-CoA acyltransferase (EC 2.3.1.9) (Acetoacetyl-CoA thiolase)	fatty acid beta-oxidation [GO:0006635]	K00626;	0.02	0.12	0	0.72	-0.02	-0.03	-0.26	0.6	0.457358	0.00250931	0.000307644	0.999334	0.58463	0.345968	0.814727
SAOUHSC_00338	7	metE	CodY , SigB	Q2G122	Amino Acids and Derivatives / Lysine, threonine, methionine, and cysteine / Methionine Biosynthesis / 5-methyltetrahydropteroyltriglutamate--homocysteine methyltransferase (EC 2.1.1.14)	5-methyltetrahydropteroyltriglutamate--homocysteine methyltransferase (EC 2.1.1.14) (Cobalamin-independent methionine synthase) (Methionine synthase, vitamin-B12 independent isozyme)	homocysteine metabolic process [GO:0050667]	K00549;	-0.03	-0.91	1.06	2.28	0.03	-0.16	1.27	2.25	0.203711	4.55e-06	0.000159053	0.999334	0.157506	0.89433	0.981824
SAOUHSC_00344	2	-	NA	Q2G117	Potassium homeostasis / Potassium efflux system KefA protein / Small-conductance mechanosensitive channel	Uncharacterized protein	cellular response to osmotic stress [GO:0071470]	K22044;	0.08	0.11	-0.13	0.38	-0.08	-0.09	-2.27	0.4	0.138084	0.145642	0.0115812	0.999334	0.991136	0.185888	0.987719
SAOUHSC_00346	14	ychF	NA	Q2G115	Protein Metabolism / Protein biosynthesis / Universal GTPases / GTP-binding and nucleic acid-binding protein YchF	Ribosome-binding ATPase YchF		K06942;	0.04	0.3	0.3	0.36	-0.04	0.1	0.16	0.2	0.769103	0.111775	0.0436566	0.999334	0.620005	0.894727	0.970543
SAOUHSC_00348	9	rpsF	NA	Q2G113	Protein Metabolism / Protein biosynthesis / Ribosome SSU bacterial / SSU ribosomal protein S6p	30S ribosomal protein S6	translation [GO:0006412]	K02990;	0.03	0.49	0.33	0.09	-0.03	0.16	-0.06	-0.18	0.344032	0.11299	0.323118	0.999334	0.477284	0.2735	0.801035
SAOUHSC_00349	3	ssb	NA	Q2G112	DNA Metabolism / DNA repair / DNA repair, bacterial RecFOR pathway / Single-stranded DNA-binding protein; DNA Metabolism / DNA repair / DNA repair, bacterial / Single-stranded DNA-binding protein; DNA Metabolism / DNA repair / DNA repair, bacterial UmuCD system / Single-stranded DNA-binding protein	Single-stranded DNA-binding protein (SSB)	DNA recombination [GO:0006310]; DNA repair [GO:0006281]; DNA replication [GO:0006260]	K03111;	-0.08	0.11	0.1	-0.42	0.08	0.03	-0.05	-0.58	0.636908	0.225883	0.0406053	0.999334	0.834203	0.697072	0.599549
SAOUHSC_00350	4	rpsR	NA	Q2G111	Phages, Prophages, Transposable elements, Plasmids / Pathogenicity islands / Staphylococcal pathogenicity islands SaPI / SSU ribosomal protein S18p; Protein Metabolism / Protein biosynthesis / Ribosome SSU bacterial / SSU ribosomal protein S18p; Ribosome SSU bacterial / SSU ribosomal protein S18p, zinc-independent	30S ribosomal protein S18	translation [GO:0006412]	K02963;	0.23	0.7	-0.02	-1.13	-0.23	0.35	0.17	-0.92	0.652662	0.128596	0.000214857	0.999334	0.824907	0.945875	0.852166
SAOUHSC_00356	11	-	SigB	Q2G105	FIG01108790: hypothetical protein	Uncharacterized protein			0.13	-1.14	-0.79	-1.83	-0.13	-0.77	-0.91	-1.81	0.013233	2.2e-05	1.05e-06	0.999334	0.00628345	0.857563	0.336694
SAOUHSC_00357	3	-	NA	Q2G104	FIG01107864: hypothetical protein	Uncharacterized protein			-0.21	-1.3	0.34	0.77	0.21	-0.6	-1.86	0.82	0.101397	0.014722	0.0096181	0.999334	0.85595	0.0892497	0.801035
SAOUHSC_00359	3	-	NA	Q2G101	CBSS-196164.1.peg.461 / Phosphoglycerate mutase family protein	Phosphoglycerate mutase family protein	metabolic process [GO:0008152]	K01834;	0.04	-0.5	-0.22	-0.19	-0.04	-0.65	-1.1	-1.45	0.171509	0.332368	0.0026975	0.999334	0.93811	0.475733	0.223001
SAOUHSC_00362	5	-	NA	Q2G0Z9	FIG01108125: hypothetical protein	Uncharacterized protein			-0.06	-0.23	-0.5	-0.01	0.06	0.1	-0.42	-0.4	0.0187305	0.0259905	0.000894639	0.999334	0.591015	0.993574	0.131909
SAOUHSC_00364	19	ahpF	PerR	O05204	Sulfur Metabolism / Sulfur Metabolism - no subcategory / Thioredoxin-disulfide reductase / Alkyl hydroperoxide reductase protein F (EC 1.6.4.-)	Alkyl hydroperoxide reductase subunit F (EC 1.8.1.-)	cell redox homeostasis [GO:0045454]; response to reactive oxygen species [GO:0000302]	K03387;	0.08	-0.76	-0.36	-0.48	-0.08	-0.46	-0.14	-0.19	0.125142	0.00340198	0.0042754	0.999334	0.122895	0.153875	0.227262
SAOUHSC_00365	11	ahpC	PerR	P0A0B7	Thioredoxin-disulfide reductase / Alkyl hydroperoxide reductase protein C (EC 1.11.1.15)	Alkyl hydroperoxide reductase C (EC 1.11.1.15) (Peroxiredoxin) (Thioredoxin peroxidase)	cell redox homeostasis [GO:0045454]; response to oxidative stress [GO:0006979]	K03386;	0.02	-0.54	-0.26	-0.25	-0.02	-0.36	0.3	0.28	0.232341	0.0605437	0.000439854	0.999334	0.28348	0.283979	0.293534
SAOUHSC_00369	14	-	SigB	Q2G0Z2	FIG01108085: hypothetical protein	Uncharacterized protein			0.05	0.09	0.08	0.28	-0.05	0.06	-0.03	-0.01	0.202167	0.17522	0.464588	0.999334	0.659981	0.889634	0.460211
SAOUHSC_00371	6	-	SigB	Q2G0Z0	FIG01108201: hypothetical protein	Uncharacterized protein			-0.56	-0.78	2.44	2.68	0.56	0.71	3.23	3.13	0.223021	0.000613062	5.73e-07	0.0851405	0.821548	0.438635	0.561697
SAOUHSC_00372	9	xpt	NA	Q2G0Y9	Nucleosides and Nucleotides / Purines / Purine conversions / Xanthine phosphoribosyltransferase (EC 2.4.2.22); Nucleosides and Nucleotides / Purines / Xanthine Metabolism in Bacteria / Xanthine phosphoribosyltransferase (EC 2.4.2.22)	Xanthine phosphoribosyltransferase (XPRTase) (EC 2.4.2.22)	purine ribonucleoside salvage [GO:0006166]; xanthine metabolic process [GO:0046110]; XMP salvage [GO:0032265]	K03816;	-0.02	-0.23	-0.31	-0.28	0.02	0.02	-0.47	-0.3	0.289337	0.444571	0.0137559	0.999334	0.606855	0.659086	0.814727
SAOUHSC_00374	19	guaB	NA	Q2G0Y7	Purine conversions / Inosine-5'-monophosphate dehydrogenase (EC 1.1.1.205) / CBS domain	Inosine-5'-monophosphate dehydrogenase (IMP dehydrogenase) (IMPD) (IMPDH) (EC 1.1.1.205)	GMP biosynthetic process [GO:0006177]; GTP biosynthetic process [GO:0006183]	K00088;	-0.05	-0.47	-0.24	-0.08	0.05	-0.21	-0.49	0.03	0.165423	0.0605437	0.00287696	0.999334	0.781529	0.283979	0.934847
SAOUHSC_00375	18	guaA	NA	Q2G0Y6	Nucleosides and Nucleotides / Purines / Purine conversions / GMP synthase [glutamine-hydrolyzing] (EC 6.3.5.2); Phages, Prophages, Transposable elements, Plasmids / Pathogenicity islands / Staphylococcal pathogenicity islands SaPI / GMP synthase [glutamine-hydrolyzing] (EC 6.3.5.2)	GMP synthase [glutamine-hydrolyzing] (EC 6.3.5.2) (GMP synthetase) (Glutamine amidotransferase)	glutamine metabolic process [GO:0006541]; GMP biosynthetic process [GO:0006177]	K01951;	-0.01	-0.21	-0.22	0.05	0.01	-0.07	-0.18	0	0.458973	0.164605	0.0309289	0.999334	0.459809	0.949352	0.977138
SAOUHSC_00397	8	hsdM1	NA	Q2G0X6	DNA Metabolism / DNA Metabolism - no subcategory / Restriction-Modification System / Type I restriction-modification system, DNA-methyltransferase subunit M (EC 2.1.1.72); DNA Metabolism / DNA Metabolism - no subcategory / Type I Restriction-Modification / Type I restriction-modification system, DNA-methyltransferase subunit M (EC 2.1.1.72)	Type I restriction-modification system, M subunit (EC 2.1.1.-)	DNA restriction-modification system [GO:0009307]	K03427;	-0.02	-0.08	-0.07	-0.03	0.02	0.06	-0.12	0	0.507172	0.906965	0.0912984	0.999334	0.733946	0.847954	0.812724
SAOUHSC_00398	4	hsdS1	NA	Q2G0X5	Restriction-Modification System / Type I restriction-modification system, specificity subunit S; Type I Restriction-Modification / Type I restriction-modification system, specificity subunit S	Restriction modification system specificity subunit, putative	DNA modification [GO:0006304]	K01154;	-0.03	0.01	-0.07	0.13	0.03	0.1	-0.42	-0.41	0.42305	0.553639	0.154812	0.999334	0.910797	0.434683	0.479163
SAOUHSC_00405	6	lpl9	NA	Q2G0W9	Tandem lipoprotein within Pathogenicity island	Uncharacterized lipoprotein SAOUHSC_00405			-0.05	-0.51	-0.32	-0.26	0.05	-0.02	0.04	-0.01	0.582701	0.050616	0.982201	0.999334	0.431642	0.794039	0.942892
SAOUHSC_00406	4	-	NA	Q2G0W8	FIG01107856: hypothetical protein	Uncharacterized protein			-0.17	-0.65	-1.18	-1.27	0.17	0.58	-0.9	-1.07	0.133733	0.00304695	4.19e-06	0.999334	0.119993	0.993574	0.924306
SAOUHSC_00410	2	-	NA	Q2G0W4	Putative metal chaperone, involved in Zn homeostasis, GTPase of COG0523 family	Uncharacterized protein			0.13	0.11	0.51	0.15	-0.13	0.08	-0.24	-1.14	0.442992	0.546004	0.000691141	0.999334	0.990596	0.567633	0.484972
SAOUHSC_00413	2	mpsB	NA	Q2G0W1	Hypothetical transmembrane protein coupled to NADH-ubiquinone oxidoreductase chain 5 homolog	UPF0753 protein SAOUHSC_00413		K09822;	-0.07	-0.59	-1.11	-1.41	0.07	-0.78	-0.99	-1.15	0.834961	0.00214165	0.0691539	0.999334	0.809508	0.976565	0.967193
SAOUHSC_00414	2	mpsC	NA	Q2G0W0	Uncharacterized protein YbcI	Uncharacterized protein			-0.11	1.1	1.13	1.53	0.11	-0.07	1.14	1	0.0668286	0.0141043	0.000401196	0.999334	0.0538477	0.989518	0.574716
SAOUHSC_00417	4	-	NA	Q2G0V7	Esterase/lipase family protein	Uncharacterized protein	lipid metabolic process [GO:0006629]	K03928;	0.03	0.19	-0.04	0.09	-0.03	0.08	-0.18	-0.1	0.826644	0.290237	0.197947	0.999334	0.990596	0.735302	0.997385
SAOUHSC_00422	2	mccB	NA	Q2G0V3	Amino Acids and Derivatives / Alanine, serine, and glycine / Glycine and Serine Utilization / Cystathionine gamma-lyase (EC 4.4.1.1); Amino Acids and Derivatives / Lysine, threonine, methionine, and cysteine / Cysteine Biosynthesis / Cystathionine gamma-lyase (EC 4.4.1.1); Amino Acids and Derivatives / Lysine, threonine, methionine, and cysteine / Methionine Biosynthesis / Cystathionine gamma-lya…	Trans-sulfuration enzyme family protein, putative		K17217;	-0.47	0.1	1.33	2.08	0.47	-1.05	0.83	2.98	0.0082774	0.000279961	1.76e-05	0.536979	0.0128397	0.0758531	0.997385
SAOUHSC_00426	3	metQ2	NA	Q2G0V0	Amino Acids and Derivatives / Lysine, threonine, methionine, and cysteine / Methionine Biosynthesis / Methionine ABC transporter substrate-binding protein; Amino Acids and Derivatives / Lysine, threonine, methionine, and cysteine / Methionine Degradation / Methionine ABC transporter substrate-binding protein; Phages, Prophages, Transposable elements, Plasmids / Pathogenicity islands / Staphylococ…	Lipoprotein		K02073;	-0.5	0.34	1.68	2.23	0.5	-0.65	1.33	2.13	0.174577	0.000626405	0.00557414	0.706347	0.101889	0.38211	0.388653
SAOUHSC_00427	6	sle1	NA	Q2G0U9	Autolysin precursor	N-acetylmuramoyl-L-alanine amidase sle1 (EC 3.5.1.28)	cell cycle [GO:0007049]; cell division [GO:0051301]; cell wall organization [GO:0071555]; cytolysis [GO:0019835]; defense response to bacterium [GO:0042742]; metabolic process [GO:0008152]; pathogenesis [GO:0009405]	K22409;	-0.18	-0.08	-4.53	-4.58	0.18	-0.27	-3.26	-3.86	0.280148	6.29e-06	5.77e-06	0.999334	0.855431	0.475733	0.639098
SAOUHSC_00429	3	-	NA	Q2G0U7	FIG01107849: hypothetical protein	MutT/nudix family protein, putative			-0.08	-0.3	-0.45	-1.23	0.08	-0.17	-0.73	-0.9	0.764622	0.0109478	0.00522681	0.999334	0.993555	0.735302	0.967193
SAOUHSC_00435	2	gltB	CodY	Q2G0U2	Amino Acids and Derivatives / Glutamine, glutamate, aspartate, asparagine; ammonia assimilation / Glutamine, Glutamate, Aspartate and Asparagine Biosynthesis / Glutamate synthase [NADPH] large chain (EC 1.4.1.13); Nitrogen Metabolism / Nitrogen Metabolism - no subcategory / Ammonia assimilation / Glutamate synthase [NADPH] large chain (EC 1.4.1.13)	Glutamate synthase, large subunit, putative (EC 1.4.1.13)	ammonia assimilation cycle [GO:0019676]; glutamate biosynthetic process [GO:0006537]	K00265;	-0.28	1.49	2.72	3.63	0.28	1.6	4.06	3.93	0.838309	0.00597105	0.000418176	0.999334	0.955612	0.915363	0.897095
SAOUHSC_00441	2	-	NA	Q2G0T6	Acetyltransferase, GNAT family	Uncharacterized protein			0.07	0.02	0.12	0.13	-0.07	0.23	0.38	-0.38	0.165423	0.524997	0.0286652	0.999334	0.33811	0.810006	0.724917
SAOUHSC_00442	9	dnaX	NA	Q2G0T5	DNA Metabolism / DNA replication / DNA-replication / DNA polymerase III subunits gamma and tau (EC 2.7.7.7); DNA Metabolism / DNA uptake, competence / DNA processing cluster / DNA polymerase III subunits gamma and tau (EC 2.7.7.7)	DNA polymerase III subunit gamma/tau (EC 2.7.7.7)	DNA-dependent DNA replication [GO:0006261]	K02343;	0.04	0.18	0.06	0.36	-0.04	0.06	-0.07	0.2	0.987828	0.183441	0.0826326	0.999334	0.990596	0.933476	0.979773
SAOUHSC_00444	6	-	NA	Q2G0T4	DNA processing cluster / Nucleoid-associated protein YaaK; DNA repair, bacterial RecFOR pathway / Nucleoid-associated protein YaaK	Nucleoid-associated protein SAOUHSC_00444		K09747;	0	-0.21	0.08	0.46	0	-0.14	-0.3	0.22	0.547412	0.0493152	0.111742	0.999334	0.989818	0.545642	0.851585
SAOUHSC_00451	9	tmk	NA	Q2G230	Nucleosides and Nucleotides / Pyrimidines / pyrimidine conversions / Thymidylate kinase (EC 2.7.4.9); CBSS-393133.3.peg.2787 / Thymidylate kinase (EC 2.7.4.9); COG1399 / Thymidylate kinase (EC 2.7.4.9)	Thymidylate kinase (EC 2.7.4.9) (dTMP kinase)	dTDP biosynthetic process [GO:0006233]; dTTP biosynthetic process [GO:0006235]; dUDP biosynthetic process [GO:0006227]	K00943;	-0.06	-0.21	-0.19	-0.27	0.06	-0.1	-0.55	-0.31	0.464726	0.384042	0.00578122	0.999334	0.990596	0.40959	0.780224
SAOUHSC_00452	2	pstA	NA	Q2G229	CBSS-393133.3.peg.2787 / protein from nitrogen regulatory protein P-II (GLNB) family, ortholog YAAQ B. subtilis	Uncharacterized protein			-0.09	-0.18	0.32	0.53	0.09	0.17	0.59	0.5	0.569823	0.0845461	0.00355626	0.999334	0.692478	0.935553	0.871723
SAOUHSC_00454	4	holB	NA	Q2G2X1	DNA Metabolism / DNA replication / DNA-replication / DNA polymerase III delta prime subunit (EC 2.7.7.7); Stress Response / Heat shock / Heat shock dnaK gene cluster extended / DNA polymerase III delta prime subunit (EC 2.7.7.7)	DNA polymerase III, delta prime subunit, putative (EC 2.7.7.7)	DNA-dependent DNA replication [GO:0006261]	K02341;	0.02	-0.03	-0.25	-0.43	-0.02	0.09	-0.51	-0.73	0.280148	0.222176	0.000412987	0.999334	0.692478	0.856796	0.567286
SAOUHSC_00455	3	-	NA	Q2G2W9	Heat shock dnaK gene cluster extended / Stage 0 sporulation protein YaaT	Uncharacterized protein			-0.04	0.1	-0.33	0.3	0.04	0.17	-0.45	-0.22	0.273566	0.0132244	0.138249	0.999334	0.990596	0.758051	0.336694
SAOUHSC_00456	2	YabA	NA	Q2G2W8	Stress Response / Heat shock / Heat shock dnaK gene cluster extended / DNA replication intiation control protein YabA	Initiation-control protein YabA	DNA replication [GO:0006260]		-0.04	-0.12	0.01	-0.24	0.04	-0.16	-0.14	0.37	0.462372	0.343703	0.156127	0.999334	0.772906	0.810006	0.730627
SAOUHSC_00459	2	rsmI	NA	Q2G1S1	Heat shock dnaK gene cluster extended / 16S rRNA (cytidine(1402)-2'-O)-methyltransferase (EC 2.1.1.198)	Ribosomal RNA small subunit methyltransferase I (EC 2.1.1.198) (16S rRNA 2'-O-ribose C1402 methyltransferase) (rRNA (cytidine-2'-O-)-methyltransferase RsmI)	enzyme-directed rRNA 2'-O-methylation [GO:0000453]	K07056;	0.11	-0.03	-0.02	-0.23	-0.11	0.04	0.16	-0.12	0.773513	0.0610362	0.586627	0.999334	0.902363	0.692603	0.801035
SAOUHSC_00461	22	metS	NA	Q2G1R9	Methionyl-tRNA synthetase (EC 6.1.1.10)	Methionine--tRNA ligase (EC 6.1.1.10) (Methionyl-tRNA synthetase) (MetRS)	methionyl-tRNA aminoacylation [GO:0006431]	K01874;	-0.04	-0.11	-0.16	0.11	0.04	-0.06	-0.12	0.13	0.891952	0.0580776	0.0257152	0.999334	0.990596	0.894727	0.889158
SAOUHSC_00462	2	-	NA	Q2G1S2	YcfH / Uncharacterized metal-dependent hydrolase YcfH	Uncharacterized protein	DNA catabolic process [GO:0006308]	K03424;	-0.07	-0.16	-0.2	-1.58	0.07	0.01	-0.79	-0.7	0.344032	0.0384887	0.0678579	0.999334	0.990596	0.536706	0.801035
SAOUHSC_00463	3	rnmV	NA	Q2G0T1	Protein Metabolism / Protein biosynthesis / Ribosome biogenesis bacterial / Ribonuclease M5 (EC 3.1.26.8)	Ribonuclease M5 (EC 3.1.26.8) (RNase M5) (Ribosomal RNA terminal maturase M5)	rRNA processing [GO:0006364]	K05985;	-0.08	-0.04	-0.15	-1.03	0.08	-0.01	-0.44	-1.42	0.457111	0.035839	0.000286824	0.999334	0.890606	0.605778	0.775849
SAOUHSC_00464	5	ksgA	NA	Q2G0T0	Protein Metabolism / Protein biosynthesis / Ribosome biogenesis bacterial / SSU rRNA (adenine(1518)-N(6)/adenine(1519)-N(6))-dimethyltransferase (EC 2.1.1.182)	Ribosomal RNA small subunit methyltransferase A (EC 2.1.1.182) (16S rRNA (adenine(1518)-N(6)/adenine(1519)-N(6))-dimethyltransferase) (16S rRNA dimethyladenosine transferase) (16S rRNA dimethylase) (S-adenosylmethionine-6-N', N'-adenosyl(rRNA) dimethyltransferase)		K02528;	-0.06	0.05	-0.02	-0.3	0.06	-0.06	-0.38	-0.57	0.11231	0.157525	0.000574185	0.999334	0.436207	0.10456	0.227262
SAOUHSC_00467	13	purR	NA	Q2G0S7	Nucleosides and Nucleotides / Purines / De Novo Purine Biosynthesis / PurR: transcription regulator associated with purine metabolism	Pur operon repressor	negative regulation of purine nucleobase metabolic process [GO:0045982]; negative regulation of transcription, DNA-templated [GO:0045892]; nucleoside metabolic process [GO:0009116]	K09685;	0.01	-0.07	0.1	0.49	-0.01	0.07	0.14	0.46	0.602035	0.0277804	0.000691141	0.999334	0.477284	0.940613	0.942892
SAOUHSC_00469	7	spoVG	SigB	Q2G0S5	Dormancy and Sporulation / Dormancy and Sporulation - no subcategory / Sporulation-associated proteins with broader functions / Protein of unknown function identified by role in sporulation (SpoVG)	Putative septation protein SpoVG	cell cycle [GO:0007049]; cell division [GO:0051301]; sporulation resulting in formation of a cellular spore [GO:0030435]	K06412;	0.03	-0.78	-0.07	-1.18	-0.03	-0.53	-0.5	-0.73	0.4505	0.0300667	0.211762	0.999334	0.990596	0.474074	0.979773
SAOUHSC_00471	6	glmU	NA	Q2G0S3	Peptidoglycan Biosynthesis / N-acetylglucosamine-1-phosphate uridyltransferase (EC 2.7.7.23) / Glucosamine-1-phosphate N-acetyltransferase (EC 2.3.1.157); Sialic Acid Metabolism / N-acetylglucosamine-1-phosphate uridyltransferase (EC 2.7.7.23) / Glucosamine-1-phosphate N-acetyltransferase (EC 2.3.1.157); UDP-N-acetylmuramate from Fructose-6-phosphate Biosynthesis / N-acetylglucosamine-1-phosphate…	Bifunctional protein GlmU [Includes: UDP-N-acetylglucosamine pyrophosphorylase (EC 2.7.7.23) (N-acetylglucosamine-1-phosphate uridyltransferase); Glucosamine-1-phosphate N-acetyltransferase (EC 2.3.1.157)]	cell morphogenesis [GO:0000902]; cell wall organization [GO:0071555]; lipid A biosynthetic process [GO:0009245]; lipopolysaccharide biosynthetic process [GO:0009103]; peptidoglycan biosynthetic process [GO:0009252]; regulation of cell shape [GO:0008360]; UDP-N-acetylglucosamine biosynthetic process [GO:0006048]	K04042;	-0.07	-0.04	-0.09	-0.15	0.07	0.13	-0.11	-0.18	0.786174	0.836695	0.546632	0.999334	0.864621	0.915363	0.903706
SAOUHSC_00472	11	prs	NA	Q2G0S2	Carbohydrates / Central carbohydrate metabolism / Pentose phosphate pathway / Ribose-phosphate pyrophosphokinase (EC 2.7.6.1); Nucleosides and Nucleotides / Purines / De Novo Purine Biosynthesis / Ribose-phosphate pyrophosphokinase (EC 2.7.6.1)	Ribose-phosphate pyrophosphokinase (RPPK) (EC 2.7.6.1) (5-phospho-D-ribosyl alpha-1-diphosphate) (Phosphoribosyl diphosphate synthase) (Phosphoribosyl pyrophosphate synthase) (P-Rib-PP synthase) (PRPP synthase) (PRPPase)	5-phosphoribose 1-diphosphate biosynthetic process [GO:0006015]; nucleoside metabolic process [GO:0009116]; nucleotide biosynthetic process [GO:0009165]; ribonucleoside monophosphate biosynthetic process [GO:0009156]	K00948;	-0.04	0.22	-0.05	0.11	0.04	0.03	-0.31	0.03	0.404031	0.0747529	0.138249	0.999334	0.567144	0.336815	0.903706
SAOUHSC_00474	8	rplY	NA	Q2G0S0	Protein Metabolism / Protein biosynthesis / Ribosome LSU bacterial / LSU ribosomal protein L25p	50S ribosomal protein L25 (General stress protein CTC)	translation [GO:0006412]	K02897;	0.05	0.45	0.17	-0.05	-0.05	0.03	-0.11	-0.28	0.380817	0.0206367	0.125786	0.999334	0.252136	0.587165	0.801035
SAOUHSC_00475	4	pth	NA	Q2G0R9	Dormancy and Sporulation / Dormancy and Sporulation - no subcategory / Sporulation-associated proteins with broader functions / Peptidyl-tRNA hydrolase (EC 3.1.1.29); Protein Metabolism / Protein biosynthesis / Translation termination factors bacterial / Peptidyl-tRNA hydrolase (EC 3.1.1.29); Cell division-ribosomal stress proteins cluster / Peptidyl-tRNA hydrolase (EC 3.1.1.29)	Peptidyl-tRNA hydrolase (PTH) (EC 3.1.1.29) (SaPth)		K01056;	-0.04	-0.11	-0.28	0.1	0.04	-0.21	-0.18	0.15	0.740865	0.19576	0.0208047	0.999334	0.683723	0.945282	0.953733
SAOUHSC_00477	22	mfd	NA	Q2G0R8	DNA Metabolism / DNA replication / DNA-replication / Transcription-repair coupling factor; RNA Metabolism / Transcription / Transcription factors bacterial / Transcription-repair coupling factor; Cell division-ribosomal stress proteins cluster / Transcription-repair coupling factor	Transcription-repair-coupling factor (TRCF) (EC 3.6.4.-)	DNA repair [GO:0006281]	K03723;	-0.08	0.02	0.02	0.39	0.08	-0.1	-0.19	0.28	0.156924	0.0277804	0.010158	0.999334	0.374768	0.115572	0.360194
SAOUHSC_00480	3	-	NA	Q2G0R6	Nucleoside triphosphate pyrophosphohydrolase MazG / possible tetrapyrrole methyltransferase domain / Nucleoside triphosphate pyrophosphohydrolase MazG (EC 3.6.1.8)	Uncharacterized protein	dATP catabolic process [GO:0046061]; dGTP catabolic process [GO:0006203]; dTTP catabolic process [GO:0046076]; dUTP catabolic process [GO:0046081]; TTP catabolic process [GO:0046047]; UTP catabolic process [GO:0046052]	K02499;	0.01	-0.08	-0.27	0.19	-0.01	-0.17	0.01	-0.27	0.871207	0.8559	0.0507953	0.999334	0.968476	0.945875	0.890796
SAOUHSC_00481	2	-	NA	Q2G0R5	Stress Response / Heat shock / Heat shock dnaK gene cluster extended / Ribosome-associated heat shock protein implicated in the recycling of the 50S subunit (S4 paralog); Cell division-ribosomal stress proteins cluster / Ribosome-associated heat shock protein implicated in the recycling of the 50S subunit (S4 paralog)	Uncharacterized protein			0.01	-0.38	-0.19	0.25	-0.01	-0.29	-0.34	-0.18	0.2494	0.0210444	0.393695	0.999334	0.990596	0.971036	0.336694
SAOUHSC_00482	2	-	NA	Q2G0R4	Bacterial Cell Division / Cell division protein DivIC (FtsB), stabilizes FtsL against RasP cleavage; Cell division-ribosomal stress proteins cluster / Cell division protein DivIC (FtsB), stabilizes FtsL against RasP cleavage	Uncharacterized protein	cell cycle [GO:0007049]	K13052;	0.06	-0.22	-0.26	-0.12	-0.06	-0.35	-0.74	0.03	0.485638	0.316853	0.0678579	0.999334	0.939939	0.67172	0.8542
SAOUHSC_00483	3	-	NA	Q2G0R3	Cell division-ribosomal stress proteins cluster / RNA binding protein, contains ribosomal protein S1 domain	S1 RNA binding domain protein		K07571;	0.03	0.12	0.05	-0.28	-0.03	0.25	0	0.21	0.196949	0.202771	0.551495	0.999334	0.918214	0.795609	0.406621
SAOUHSC_00485	8	hpt	NA	Q2G0R1	Nucleosides and Nucleotides / Purines / Purine conversions / Hypoxanthine-guanine phosphoribosyltransferase (EC 2.4.2.8); Cell division-ribosomal stress proteins cluster / Hypoxanthine-guanine phosphoribosyltransferase (EC 2.4.2.8)	Hypoxanthine phosphoribosyltransferase (EC 2.4.2.8)	IMP salvage [GO:0032264]; purine ribonucleoside salvage [GO:0006166]	K00760;	-0.01	0.3	0.19	-0.1	0.01	0.16	0	-0.36	0.384558	0.126339	0.0141213	0.999334	0.585628	0.730036	0.336694
SAOUHSC_00486	26	ftsH	NA	Q2G0R0	Bacterial Cell Division / Cell division protein FtsH (EC 3.4.24.-); Cell division-ribosomal stress proteins cluster / Cell division protein FtsH (EC 3.4.24.-)	ATP-dependent zinc metalloprotease FtsH (EC 3.4.24.-)	protein catabolic process [GO:0030163]; proteolysis [GO:0006508]	K03798;	0.03	0.09	-0.03	0.32	-0.03	-0.08	-0.15	0.36	0.494256	0.0430651	0.000524388	0.999334	0.719986	0.909975	0.801035
SAOUHSC_00487	8	hslO	NA	Q2G0Q9	Virulence, Disease and Defense / Adhesion / Streptococcus pyogenes recombinatorial zone / Chaperonin (heat shock protein 33)	33 kDa chaperonin (Heat shock protein 33 homolog) (HSP33)	protein folding [GO:0006457]	K04083;	0	-0.08	-0.19	-0.32	0	-0.33	-0.16	-0.02	0.101397	0.159785	0.0310716	0.999334	0.26241	0.81314	0.608075
SAOUHSC_00488	13	cysK	SigB	Q2G0Q8	Amino Acids and Derivatives / Lysine, threonine, methionine, and cysteine / Cysteine Biosynthesis / Cysteine synthase (EC 2.5.1.47); Amino Acids and Derivatives / Lysine, threonine, methionine, and cysteine / Methionine Biosynthesis / Cysteine synthase (EC 2.5.1.47)	Cysteine synthase (EC 2.5.1.47)	cysteine biosynthetic process from serine [GO:0006535]	K01738;	0.05	-0.48	0.72	1.92	-0.05	-0.43	0.35	2.63	0.0277406	0.000379498	9.24e-08	0.999334	0.60943	0.467931	0.197231
SAOUHSC_00489	5	folP	NA	Q2G0Q7	Cofactors, Vitamins, Prosthetic Groups, Pigments / Folate and pterines / Folate Biosynthesis / Dihydropteroate synthase (EC 2.5.1.15)	Dihydropteroate synthase (DHPS) (EC 2.5.1.15) (Dihydropteroate pyrophosphorylase)	folic acid biosynthetic process [GO:0046656]; tetrahydrofolate biosynthetic process [GO:0046654]	K00796;	-0.08	-0.29	-0.07	0.09	0.08	0.15	-0.06	0.4	0.286684	0.11621	0.0240749	0.999334	0.42769	0.758598	0.871723
SAOUHSC_00491	2	folK	NA	Q2G0Q5	Cofactors, Vitamins, Prosthetic Groups, Pigments / Folate and pterines / Folate Biosynthesis / 2-amino-4-hydroxy-6-hydroxymethyldihydropteridine pyrophosphokinase (EC 2.7.6.3)	2-amino-4-hydroxy-6-hydroxymethyldihydropteridine pyrophosphokinase (EC 2.7.6.3)	folic acid-containing compound biosynthetic process [GO:0009396]	K00950;	-0.04	0.17	-0.23	-0.7	0.04	-0.15	-1.05	-0.54	0.18717	0.0470196	0.00153963	0.999334	0.545303	0.229553	0.978326
SAOUHSC_00493	24	lysS	NA	Q2G0Q3	Lysyl-tRNA synthetase (class II) (EC 6.1.1.6)	Lysine--tRNA ligase (EC 6.1.1.6) (Lysyl-tRNA synthetase) (LysRS)	lysyl-tRNA aminoacylation [GO:0006430]	K04567;	0	0	-0.09	0.24	0	-0.05	-0.11	0.12	0.843843	0.157628	0.0529489	0.999334	0.963133	0.894727	0.801035
SAOUHSC_00499	7	pdxS	NA	Q2G0Q1	Pyridoxin (Vitamin B6) Biosynthesis / Pyridoxal 5'-phosphate synthase (glutamine hydrolyzing), synthase subunit (EC 4.3.3.6)	Pyridoxal 5'-phosphate synthase subunit PdxS (PLP synthase subunit PdxS) (EC 4.3.3.6) (Pdx1)	pyridoxal phosphate biosynthetic process [GO:0042823]	K06215;	-0.15	0.27	0.5	0.26	0.15	0.33	0.18	0.07	0.275938	0.100072	0.602521	0.999334	0.855431	0.229016	0.790622
SAOUHSC_00501	2	nupC	NA	Q2G0P9	Carbohydrates / Monosaccharides / Deoxyribose and Deoxynucleoside Catabolism / Nucleoside permease NupC; Nucleosides and Nucleotides / Purines / Xanthine Metabolism in Bacteria / Nucleoside permease NupC	Uncharacterized protein	cytidine transport [GO:0015861]	K11535;	0.05	0.44	0.19	0.38	-0.05	0.65	0.33	0.18	0.947375	0.138993	0.0782655	0.999334	0.89848	0.933476	0.979773
SAOUHSC_00502	3	ctsR	CtsR	Q2G0P8	Transcriptional regulator CtsR	Transcriptional regulator CtsR	regulation of transcription, DNA-templated [GO:0006355]; stress response to cadmium ion [GO:1990170]; stress response to copper ion [GO:1990169]; transcription, DNA-templated [GO:0006351]	K03708;	-0.04	0.07	1.35	0.89	0.04	0.7	0.32	1.01	0.131427	0.0980484	0.0368452	0.999334	0.2573	0.647721	0.889158
SAOUHSC_00504	5	mcsB	CtsR	Q2G0P6	Putative ATP:guanido phosphotransferase YacI (EC 2.7.3.-)	Protein-arginine kinase (EC 2.7.14.1)	stress response to cadmium ion [GO:1990170]; stress response to copper ion [GO:1990169]	K19405;	-0.06	0.47	0.1	0.09	0.06	0.2	-0.17	0.08	0.511545	0.132415	0.38227	0.999334	0.722198	0.409148	0.910615
SAOUHSC_00505	33	clpC	CtsR	Q2G0P5	Protein Metabolism / Protein degradation / Proteolysis in bacteria, ATP-dependent / ATP-dependent Clp protease, ATP-binding subunit ClpC	ATP-dependent Clp protease ATP-binding subunit ClpC	pathogenesis [GO:0009405]; protein metabolic process [GO:0019538]; stress response to cadmium ion [GO:1990170]; stress response to copper ion [GO:1990169]	K03696;	0	0.22	-0.03	0.14	0	-0.02	-0.09	0.16	0.361714	0.201815	0.0305079	0.999334	0.362795	0.836747	0.947941
SAOUHSC_00507	5	radA	NA	Q2G243	DNA Metabolism / DNA repair / DNA repair, bacterial / DNA repair protein RadA	DNA repair protein RadA	recombinational repair [GO:0000725]	K04485;	-0.13	0.14	0.06	0.51	0.13	-0.03	0.26	0.46	0.764775	0.0204322	0.173244	0.999334	0.758836	0.979206	0.801035
SAOUHSC_00508	4	-	NA	Q2G242	Stress Response / Heat shock / Heat shock dnaK gene cluster extended / Membrane-associated protein containing RNA-binding TRAM domain and ribonuclease PIN-domain, YacL B.subtilis ortholog	Uncharacterized protein			-0.03	-0.08	-0.27	0.76	0.03	0.07	-0.9	-0.18	0.148864	0.0296339	0.013579	0.999334	0.675533	0.495856	0.437044
SAOUHSC_00509	21	gltX	NA	Q2G241	Protein Metabolism / Protein biosynthesis / tRNA aminoacylation, Glu and Gln / tRNA glutamyl-Q(34)-Gln synthetase (EC 6.1.1.24); Protein Metabolism / Protein biosynthesis / tRNA aminoacylation, Glu and Gln / tRNA glutamyl-Q(34)-Glu synthetase (EC 6.1.1.17)	Glutamate--tRNA ligase (EC 6.1.1.17) (Glutamyl-tRNA synthetase) (GluRS)	glutamyl-tRNA aminoacylation [GO:0006424]	K09698;	0.08	-0.08	-0.06	-0.13	-0.08	-0.18	-0.21	-0.16	0.934339	0.667096	0.754394	0.999334	0.864621	0.981298	0.947117
SAOUHSC_00510	2	cysE	NA	Q2G2M7	Amino Acids and Derivatives / Lysine, threonine, methionine, and cysteine / Cysteine Biosynthesis / Serine acetyltransferase (EC 2.3.1.30); Amino Acids and Derivatives / Lysine, threonine, methionine, and cysteine / Methionine Biosynthesis / Serine acetyltransferase (EC 2.3.1.30); Miscellaneous / Plant-Prokaryote comparative genomics / Conserved gene cluster possibly involved in RNA metabolism / …	Serine acetyltransferase (EC 2.3.1.30)	cysteine biosynthetic process [GO:0019344]; cysteine biosynthetic process from serine [GO:0006535]	K00640;	0.09	0.04	0.22	0.99	-0.09	0.18	0.93	1.71	0.570493	0.263205	1.43e-05	0.999334	0.662796	0.61413	0.495967
SAOUHSC_00511	17	cysS	NA	Q2G2M6	Miscellaneous / Plant-Prokaryote comparative genomics / Conserved gene cluster possibly involved in RNA metabolism / Cysteinyl-tRNA synthetase (EC 6.1.1.16)	Cysteine--tRNA ligase (EC 6.1.1.16) (Cysteinyl-tRNA synthetase) (CysRS)	cysteinyl-tRNA aminoacylation [GO:0006423]	K01883;	0	-0.13	0.13	0.33	0	-0.02	0.21	0.61	0.462139	0.00767499	0.00415144	0.999334	0.609186	0.857601	0.414994
SAOUHSC_00513	7	-	NA	Q2G2M3	Conserved gene cluster possibly involved in RNA metabolism / 23S rRNA (guanosine-2'-O-) -methyltransferase rlmB (EC 2.1.1.-)	Uncharacterized protein	enzyme-directed rRNA 2'-O-methylation [GO:0000453]	K03218;	0.01	0.04	-0.1	0.24	-0.01	0.05	-0.33	0.5	0.529686	0.602135	0.142712	0.999334	0.990596	0.772389	0.801035
SAOUHSC_00514	3	-	NA	Q2G2M5	Miscellaneous / Plant-Prokaryote comparative genomics / Conserved gene cluster possibly involved in RNA metabolism / Hypothetical protein DUF901, similar to C-terminal domain of ribosome protection-type Tc-resistance proteins	Uncharacterized protein		K06962;	-0.15	-0.28	-0.17	-0.1	0.15	-0.07	-0.52	-1.12	0.101397	0.646787	0.00815847	0.999334	0.990596	0.275169	0.197231
SAOUHSC_00517	13	nusG	NA	Q2G0P2	RNA Metabolism / Transcription / Transcription factors bacterial / Transcription antitermination protein NusG	Transcription termination/antitermination protein NusG	DNA-templated transcription, termination [GO:0006353]; regulation of DNA-templated transcription, elongation [GO:0032784]; regulation of transcription, DNA-templated [GO:0006355]; transcription antitermination [GO:0031564]	K02601;	-0.03	0.19	0.23	0.12	0.03	0.18	-0.16	0.11	0.0256694	0.203119	0.0139932	0.999334	0.719228	0.0334916	0.871723
SAOUHSC_00518	3	rplK	NA	P0A0F4	Protein Metabolism / Protein biosynthesis / Ribosome LSU bacterial / LSU ribosomal protein L11p (L12e)	50S ribosomal protein L11	ribosomal large subunit assembly [GO:0000027]; translation [GO:0006412]	K02867;	0.01	0.57	0.16	-0.16	-0.01	0.07	0.25	-0.39	0.0306969	0.00475782	0.000790293	0.999334	0.023359	0.996049	0.608795
SAOUHSC_00519	11	rplA	NA	Q2G0P0	Protein Metabolism / Protein biosynthesis / Ribosome LSU bacterial / LSU ribosomal protein L1p (L10Ae)	50S ribosomal protein L1	maturation of LSU-rRNA [GO:0000470]; regulation of translation [GO:0006417]; translation [GO:0006412]	K02863;	0.03	0.43	0.32	-0.14	-0.03	0.09	0.14	-0.2	0.148594	0.00624317	0.0144611	0.999334	0.113746	0.842902	0.934847
SAOUHSC_00520	5	rplJ	NA	Q2G0N9	Protein Metabolism / Protein biosynthesis / Ribosome LSU bacterial / LSU ribosomal protein L10p (P0)	50S ribosomal protein L10	ribosome biogenesis [GO:0042254]; translation [GO:0006412]	K02864;	-0.02	0.47	0.27	-0.02	0.02	0.16	0.09	-0.12	0.367109	0.0386555	0.386687	0.999334	0.279494	0.808397	0.931932
SAOUHSC_00521	8	rplL	NA	P48860	Ribosome LSU bacterial / LSU ribosomal protein L7p/L12p (P1/P2)	50S ribosomal protein L7/L12	translation [GO:0006412]	K02935;	0.14	0.26	0.46	-0.29	-0.14	0.04	0.12	-0.3	0.679584	0.115064	0.0221552	0.999334	0.846069	0.828436	0.902562
SAOUHSC_00523	7	rsmC	NA	Q2G0N7	16S rRNA (guanine(1207)-N(2))-methyltransferase (EC 2.1.1.172)	Uncharacterized protein			-0.07	0.3	-0.03	-0.48	0.07	-0.2	-0.58	-0.58	0.17457	0.0221109	0.0315284	0.999334	0.119993	0.273542	0.724917
SAOUHSC_00524	58	rpoB	NA	P47768	RNA Metabolism / Transcription / RNA polymerase bacterial / DNA-directed RNA polymerase beta subunit (EC 2.7.7.6); Virulence / Virulence - no subcategory / Mycobacterium virulence operon involved in DNA transcription / DNA-directed RNA polymerase beta subunit (EC 2.7.7.6)	DNA-directed RNA polymerase subunit beta (RNAP subunit beta) (EC 2.7.7.6) (RNA polymerase subunit beta) (Transcriptase subunit beta)	transcription, DNA-templated [GO:0006351]	K03043;	0.01	0.27	0.17	-0.13	-0.01	0.08	0.14	-0.14	0.272702	0.0234514	0.0230819	0.999334	0.225769	0.894727	0.977138
SAOUHSC_00525	68	rpoC	NA	Q2G0N5	Mycobacterium virulence operon involved in DNA transcription / DNA-directed RNA polymerase beta' subunit (EC 2.7.7.6); RNA polymerase bacterial / DNA-directed RNA polymerase beta' subunit (EC 2.7.7.6)	DNA-directed RNA polymerase subunit beta' (RNAP subunit beta') (EC 2.7.7.6) (RNA polymerase subunit beta') (Transcriptase subunit beta')	transcription, DNA-templated [GO:0006351]	K03046;	-0.01	0.29	0.08	-0.04	0.01	0.07	0.04	-0.16	0.134038	0.0370689	0.070589	0.999334	0.0906545	0.795609	0.451965
SAOUHSC_00527	6	rpsL	NA	P0A0H0	Protein Metabolism / Protein biosynthesis / Ribosome SSU bacterial / SSU ribosomal protein S12p (S23e); Protein Metabolism / Protein processing and modification / Ribosomal protein S12p Asp methylthiotransferase / SSU ribosomal protein S12p (S23e); Virulence / Virulence - no subcategory / Mycobacterium virulence operon involved in protein synthesis (SSU ribosomal proteins) / SSU ribosomal protein…	30S ribosomal protein S12	translation [GO:0006412]	K02950;	-0.01	0.53	0.21	-0.09	0.01	0.25	0.12	-0.22	0.223021	0.00821366	0.0238968	0.999334	0.136152	0.845857	0.799821
SAOUHSC_00528	8	rpsG	NA	P48940	Protein Metabolism / Protein biosynthesis / Ribosome SSU bacterial / SSU ribosomal protein S7p (S5e); Virulence / Virulence - no subcategory / Mycobacterium virulence operon involved in protein synthesis (SSU ribosomal proteins) / SSU ribosomal protein S7p (S5e)	30S ribosomal protein S7	ribosomal small subunit assembly [GO:0000028]; translation [GO:0006412]	K02992;	0.08	0.49	0.23	-0.21	-0.08	0.12	-0.13	-0.38	0.329123	0.00246346	0.017765	0.999334	0.489548	0.394454	0.988848
SAOUHSC_00529	28	fusA	NA	Q2G0N1	Protein Metabolism / Protein biosynthesis / Translation elongation factor G family / Translation elongation factor G; Protein Metabolism / Protein biosynthesis / Translation elongation factors bacterial / Translation elongation factor G; Protein Metabolism / Protein biosynthesis / Universal GTPases / Translation elongation factor G; Virulence / Virulence - no subcategory / Mycobacterium virulence…	Elongation factor G (EF-G)		K02355;	0.03	0.45	0.34	0.15	-0.03	0.18	0.23	0.12	0.112648	0.00700704	0.0252568	0.999334	0.0964407	0.610959	0.998184
SAOUHSC_00530	22	tuf	NA	Q2G0N0	Protein Metabolism / Protein biosynthesis / Translation elongation factors bacterial / Translation elongation factor Tu; Protein Metabolism / Protein biosynthesis / Universal GTPases / Translation elongation factor Tu; Virulence / Virulence - no subcategory / Mycobacterium virulence operon involved in protein synthesis (SSU ribosomal proteins) / Translation elongation factor Tu	Elongation factor Tu (EF-Tu)		K02358;	0.03	0.28	0.18	0.32	-0.03	0.08	0.18	0.3	0.414974	0.068821	0.0105329	0.999334	0.405247	0.993574	0.970543
SAOUHSC_00531	4	-	NA	Q2G0M9	Amino Acids and Derivatives / Lysine, threonine, methionine, and cysteine / Lysine Biosynthesis DAP Pathway / N-acetyl-L,L-diaminopimelate deacetylase (EC 3.5.1.47)	Uncharacterized protein	metabolic process [GO:0008152]		-0.09	-0.45	-0.33	0.49	0.09	-0.27	-0.71	0.31	0.405303	0.00137057	0.0144752	0.999334	0.904228	0.467931	0.871723
SAOUHSC_00532	9	kbl	NA	Q2G0M8	Amino Acids and Derivatives / Alanine, serine, and glycine / Glycine and Serine Utilization / 2-amino-3-ketobutyrate coenzyme A ligase (EC 2.3.1.29); Amino Acids and Derivatives / Alanine, serine, and glycine / Glycine Biosynthesis / 2-amino-3-ketobutyrate coenzyme A ligase (EC 2.3.1.29); Amino Acids and Derivatives / Lysine, threonine, methionine, and cysteine / Threonine degradation / 2-amino-3…	Uncharacterized protein	biosynthetic process [GO:0009058]	K00639;	0	-0.31	0.47	0.53	0	-0.13	0.54	0.52	0.787849	0.0210788	1.76e-05	0.999334	0.657698	0.807275	0.977138
SAOUHSC_00533	11	hchA	NA	Q2G0M7	D-lactate dehydratase (EC 4.2.1.130)	Protein/nucleic acid deglycase HchA (EC 3.1.2.-) (EC 3.5.1.-) (EC 3.5.1.124) (Maillard deglycase)	DNA repair [GO:0006281]; regulation of transcription, DNA-templated [GO:0006355]	K05523;	0.01	-0.95	-0.47	-0.92	-0.01	-0.81	-0.47	-0.81	0.46172	0.000835922	0.000108699	0.999334	0.352242	0.499299	0.568421
SAOUHSC_00535	8	-	NA	Q2G0M5	Amino Acids and Derivatives / Alanine, serine, and glycine / Glycine Biosynthesis / L-threonine 3-dehydrogenase (EC 1.1.1.103); Amino Acids and Derivatives / Lysine, threonine, methionine, and cysteine / Threonine degradation / L-threonine 3-dehydrogenase (EC 1.1.1.103)	Uncharacterized epimerase/dehydratase SAOUHSC_00535			-0.05	0.16	1.02	0.67	0.05	0.32	0.86	0.65	0.474843	0.00335915	0.00116937	0.999334	0.819131	0.758958	0.801035
SAOUHSC_00536	15	ilvE	CodY	Q2G0M4	Amino Acids and Derivatives / Alanine, serine, and glycine / Alanine biosynthesis / Branched-chain amino acid aminotransferase (EC 2.6.1.42); Amino Acids and Derivatives / Branched-chain amino acids / Branched-Chain Amino Acid Biosynthesis / Branched-chain amino acid aminotransferase (EC 2.6.1.42); Amino Acids and Derivatives / Branched-chain amino acids / Isoleucine degradation / Branched-chain …	Branched-chain-amino-acid aminotransferase (EC 2.6.1.42)	isoleucine biosynthetic process [GO:0009097]; leucine biosynthetic process [GO:0009098]; valine biosynthetic process [GO:0009099]	K00826;	0.02	-0.28	-0.11	0.56	-0.02	-0.2	0.12	0.56	0.456775	0.000990802	0.000210586	0.999334	0.662796	0.452072	0.992907
SAOUHSC_00538	6	-	NA	Q2G0M2	Hydrolase, haloacid dehalogenase-like family	Haloacid dehalogenase-like hydrolase, putative	dephosphorylation [GO:0016311]; DNA repair [GO:0006281]	K01091;	-0.04	-0.71	-0.35	0.27	0.04	-0.13	-0.21	0.43	0.101397	0.000511535	0.00574764	0.999334	0.147932	0.730036	0.934847
SAOUHSC_00539	8	-	NA	Q2G0M1	Purine conversions / Deoxyadenosine kinase (EC 2.7.1.76) / Deoxyguanosine kinase (EC 2.7.1.113)	Uncharacterized protein		K15519;	0.01	0.24	-0.18	-0.38	-0.01	0.02	-0.29	-0.43	0.777331	0.0883826	0.135084	0.999334	0.620005	0.894727	0.96176
SAOUHSC_00540	4	-	NA	Q2G0M0	Nucleosides and Nucleotides / Purines / Purine conversions / Deoxyguanosine kinase (EC 2.7.1.113)	Uncharacterized protein		K15518;	-0.22	0.22	-0.1	-0.31	0.22	-0.15	-0.52	-0.41	0.305471	0.0496688	0.0224008	0.999334	0.306513	0.475256	0.979773
SAOUHSC_00542	11	-	NA	Q2G0L8	Hydrolase (HAD superfamily)	Uncharacterized protein			-0.04	-0.14	-0.03	-0.01	0.04	-0.05	-0.12	-0.04	0.275269	0.284052	0.239446	0.999334	0.653781	0.486328	0.934847
SAOUHSC_00543	4	-	NA	Q2G0L7	Predicted flavoprotein	FMN-dependent NADPH-azoreductase (EC 1.7.-.-) (NADPH-dependent flavo-azoreductase) (NADPH-flavin azoreductase)			-0.08	-0.35	-0.18	-0.41	0.08	-0.46	-0.34	-0.3	0.762547	0.361103	0.0255445	0.999334	0.990596	0.688212	0.931932
SAOUHSC_00544	14	sdrC	NA	Q2G0L5	Virulence, Disease and Defense / Adhesion / Adhesins in Staphylococcus / Adhesin of unknown specificity SdrC	Serine-aspartate repeat-containing protein C	cell adhesion [GO:0007155]	K14194;	-0.16	0.63	-2.41	-2.46	0.16	1.39	-0.63	-1.48	0.614041	0.00727754	4.25e-06	0.999334	0.553058	0.521234	0.799133
SAOUHSC_00545	34	sdrD	NA	Q2G0L4	Virulence, Disease and Defense / Adhesion / Adhesins in Staphylococcus / Adhesin of unknown specificity SdrD	Serine-aspartate repeat-containing protein D	cell adhesion [GO:0007155]	K14194;	-0.11	-0.31	-3.53	-4.82	0.11	0.8	-2.45	-4.11	0.713318	2.86e-05	9.92e-06	0.999334	0.594531	0.979206	0.910615
SAOUHSC_00547	2	-	NA	Q2G0L3	Cell Wall and Capsule / Gram-Positive cell wall components / Teichoic and lipoteichoic acids biosynthesis / Poly(glycerol-phosphate) alpha-glucosyltransferase (EC 2.4.1.52)	Uncharacterized protein		K00712;	-0.08	0.18	0.33	1	0.08	0.48	0.28	0.67	0.581092	0.145828	0.351394	0.999334	0.943786	0.857601	0.71512
SAOUHSC_00548	7	-	NA	Q2G0L2	Cell Wall and Capsule / Gram-Positive cell wall components / Teichoic and lipoteichoic acids biosynthesis / Poly(glycerol-phosphate) alpha-glucosyltransferase (EC 2.4.1.52)	Uncharacterized protein		K00712;	-0.09	0.09	0.3	-0.02	0.09	0.4	0.06	0.22	0.164303	0.112178	0.190578	0.999334	0.687553	0.345968	0.931932
SAOUHSC_00549	9	folE2	NA	Q2G0L1	Cofactors, Vitamins, Prosthetic Groups, Pigments / Folate and pterines / Folate Biosynthesis / GTP cyclohydrolase I (EC 3.5.4.16) type 2; RNA Metabolism / RNA processing and modification / Queuosine-Archaeosine Biosynthesis / GTP cyclohydrolase I (EC 3.5.4.16) type 2	GTP cyclohydrolase FolE2 (EC 3.5.4.16)	7,8-dihydroneopterin 3'-triphosphate biosynthetic process [GO:0035998]	K09007;	0.03	0.01	0.03	-0.09	-0.03	-0.35	-0.37	-0.13	0.692503	0.236456	0.304479	0.999334	0.767732	0.69911	0.979773
SAOUHSC_00552	4	nagB	NA	Q2G0K8	Carbohydrates / Aminosugars / Chitin and N-acetylglucosamine utilization / Glucosamine-6-phosphate deaminase (EC 3.5.99.6); Carbohydrates / One-carbon Metabolism / Formaldehyde assimilation: Ribulose monophosphate pathway / Glucosamine-6-phosphate deaminase (EC 3.5.99.6); Cell Wall and Capsule / Capsular and extracellular polysacchrides / Sialic Acid Metabolism / Glucosamine-6-phosphate deaminase…	Glucosamine-6-phosphate deaminase (EC 3.5.99.6) (GlcN6P deaminase) (GNPDA) (Glucosamine-6-phosphate isomerase)	carbohydrate metabolic process [GO:0005975]; N-acetylglucosamine metabolic process [GO:0006044]; N-acetylneuraminate catabolic process [GO:0019262]	K02564;	-0.02	-0.27	-0.11	0.78	0.02	-0.19	-0.21	0.57	0.242556	0.00307257	3.37e-05	0.999334	0.846069	0.430895	0.60932
SAOUHSC_00553	9	hxlA	SigB	Q2G0K7	Carbohydrates / One-carbon Metabolism / Formaldehyde assimilation: Ribulose monophosphate pathway / D-arabino-3-hexulose 6-phosphate formaldehyde-lyase (EC 4.1.2.43)	3-hexulose-6-phosphate synthase (HPS) (EC 4.1.2.43) (D-arabino-3-hexulose-6-phosphate formaldehyde lyase)	'de novo' pyrimidine nucleobase biosynthetic process [GO:0006207]; carbohydrate metabolic process [GO:0005975]; formaldehyde assimilation via ribulose monophosphate cycle [GO:0019647]; one-carbon metabolic process [GO:0006730]	K08093;	0.06	-0.51	-0.44	-0.49	-0.06	-0.66	-0.4	-0.61	0.62538	0.00588511	0.00116937	0.999334	0.896005	0.482949	0.900145
SAOUHSC_00554	7	hxlB	SigB	Q2G0K6	Carbohydrates / One-carbon Metabolism / Formaldehyde assimilation: Ribulose monophosphate pathway / 6-phospho-3-hexuloisomerase (EC 5.3.1.27)	SIS domain protein	carbohydrate derivative metabolic process [GO:1901135]	K08094;	0.05	-0.24	-0.38	-0.12	-0.05	-0.26	-0.15	-0.19	0.602035	0.224278	0.59678	0.999334	0.966175	0.606565	0.982857
SAOUHSC_00555	3	-	NA	Q2G0K5	Carbohydrates / Central carbohydrate metabolism / Glycolate, glyoxylate interconversions / Phosphoglycolate phosphatase (EC 3.1.3.18); DNA Metabolism / DNA repair / 2-phosphoglycolate salvage / Phosphoglycolate phosphatase (EC 3.1.3.18)	Hydrolase, haloacid dehalogenase-like	dephosphorylation [GO:0016311]; DNA repair [GO:0006281]		0.06	-0.08	-0.07	-0.21	-0.06	0.36	-0.8	-0.12	0.0878516	0.539976	0.00426898	0.999334	0.374406	0.344806	0.942892
SAOUHSC_00558	3	vraB	NA	Q2G0K2	Amino Acids and Derivatives / Branched-chain amino acids / Isoleucine degradation / 3-ketoacyl-CoA thiolase (EC 2.3.1.16); Carbohydrates / One-carbon Metabolism / Serine-glyoxylate cycle / 3-ketoacyl-CoA thiolase (EC 2.3.1.16); Carbohydrates / Fermentation / Acetyl-CoA fermentation to Butyrate / Acetyl-CoA acetyltransferase (EC 2.3.1.9); Carbohydrates / Fermentation / Butanol Biosynthesis / Acety…	Acetyl-CoA acetyltransferase, putative	metabolic process [GO:0008152]	K00626;	-0.09	-0.96	-0.81	-1.6	0.09	-0.73	-0.84	-1.72	0.818167	0.00333078	7.68e-05	0.999334	0.993555	0.935553	0.801035
SAOUHSC_00562	11	pdxK	NA	Q2G0J8	Novel pyridoxal kinase, thiD family (EC 2.7.1.35)	Phosphomethylpyrimidine kinase (EC 2.7.4.7)	thiamine biosynthetic process [GO:0009228]	K00868;	0	-0.29	-0.15	0.03	0	-0.01	0	0.33	0.275938	0.0909638	0.00820993	0.999334	0.283584	0.971036	0.495365
SAOUHSC_00564	2	ung	NA	Q2G0J7	DNA Repair Base Excision / Uracil-DNA glycosylase, family 1 (EC 3.2.2.27); Uracil-DNA glycosylase / Uracil-DNA glycosylase, family 1 (EC 3.2.2.27)	Uracil-DNA glycosylase (UDG) (EC 3.2.2.27)	base-excision repair, AP site formation via deaminated base removal [GO:0097510]	K03648;	-0.04	-0.2	-0.23	-0.32	0.04	-0.25	0.05	-1.03	0.24728	0.192123	0.0133107	0.999334	0.993555	0.824385	0.413946
SAOUHSC_00569	3	-	SigB	Q2G0J4	cationic amino acid transporter	Uncharacterized protein			0.01	-0.76	-0.7	-1.28	-0.01	-0.9	-0.83	-1.3	0.988132	0.0305338	0.0107591	0.999334	0.990596	0.929079	0.979773
SAOUHSC_00573	6	hemQ	NA	Q2G0J1	Coproheme decarboxylase HemQ (no EC)	Putative heme-dependent peroxidase SAOUHSC_00573 (EC 1.11.1.-) (UPF0447 protein SAOUHSC_00573)		K00435;	0.01	-0.16	-0.02	0.99	-0.01	-0.04	0.16	0.91	0.94679	0.0150363	0.000334711	0.999334	0.859386	0.979206	0.997378
SAOUHSC_00574	12	eutD	NA	Q2G0J0	Carbohydrates / Central carbohydrate metabolism / Pyruvate metabolism II: acetyl-CoA, acetogenesis from pyruvate / Phosphate acetyltransferase (EC 2.3.1.8); Carbohydrates / Fermentation / Fermentations: Lactate / Phosphate acetyltransferase (EC 2.3.1.8); Carbohydrates / Fermentation / Fermentations: Mixed acid / Phosphate acetyltransferase (EC 2.3.1.8)	Phosphate acetyltransferase (EC 2.3.1.8)	metabolic process [GO:0008152]	K00625;	-0.03	-0.02	-0.09	0.16	0.03	0.12	-0.01	0.23	0.781301	0.100296	0.0661036	0.999334	0.649292	0.758051	0.931932
SAOUHSC_00577	6	mvaK1	SigB	Q2G0I8	Fatty Acids, Lipids, and Isoprenoids / Isoprenoids / Archaeal lipids / Mevalonate kinase (EC 2.7.1.36); Fatty Acids, Lipids, and Isoprenoids / Isoprenoids / Isoprenoid Biosynthesis / Mevalonate kinase (EC 2.7.1.36)	Mevalonate kinase, putative	isopentenyl diphosphate biosynthetic process, mevalonate pathway [GO:0019287]; sterol metabolic process [GO:0016125]	K00869;	0.17	-0.16	-0.12	-0.2	-0.17	-0.24	-0.29	-0.08	0.706388	0.147752	0.353562	0.999334	0.986176	0.971036	0.801035
SAOUHSC_00578	3	mvaD	SigB	Q2G0I7	Fatty Acids, Lipids, and Isoprenoids / Isoprenoids / Archaeal lipids / Diphosphomevalonate decarboxylase (EC 4.1.1.33); Fatty Acids, Lipids, and Isoprenoids / Isoprenoids / Isoprenoid Biosynthesis / Diphosphomevalonate decarboxylase (EC 4.1.1.33)	Diphosphomevalonate decarboxylase (EC 4.1.1.33)	isopentenyl diphosphate biosynthetic process, mevalonate pathway [GO:0019287]	K01597;	-0.09	-0.04	-0.27	-0.07	0.09	-0.13	-0.23	-0.75	0.133733	0.78175	0.0615901	0.999334	0.821117	0.693273	0.180316
SAOUHSC_00579	7	mvaK2	SigB	Q2G0I6	Fatty Acids, Lipids, and Isoprenoids / Isoprenoids / Archaeal lipids / Phosphomevalonate kinase (EC 2.7.4.2); Fatty Acids, Lipids, and Isoprenoids / Isoprenoids / Isoprenoid Biosynthesis / Phosphomevalonate kinase (EC 2.7.4.2)	Phosphomevalonate kinase (EC 2.7.4.2)		K00938;	0.07	-0.09	0.02	-0.09	-0.07	-0.2	-0.34	-0.1	0.4505	0.473901	0.264062	0.999334	0.990596	0.499322	0.931932
SAOUHSC_00603	7	-	NA	Q2G0G6	Oxidoreductase ion channel	Uncharacterized protein			-0.01	0.01	-0.25	-0.37	0.01	-0.02	0.1	-0.09	0.750195	0.128596	0.707364	0.999334	0.993555	0.699562	0.8542
SAOUHSC_00605	3	-	NA	Q2G0G4	hypothetical fig|282458.1.peg.579 homolog	Uncharacterized protein			0.03	0.02	-0.02	0.03	-0.03	0.21	-0.12	-0.15	0.223021	0.430524	0.0306588	0.999334	0.443579	0.894727	0.71512
SAOUHSC_00606	3	-	NA	Q2G0G3	Purine conversions / dNTP triphosphohydrolase, putative	Uncharacterized protein	dGTP catabolic process [GO:0006203]	K06885;	0.03	-0.13	-0.31	-0.26	-0.03	-0.28	-0.5	-0.54	0.713318	0.118898	0.131756	0.999334	0.990596	0.695485	0.851404
SAOUHSC_00607	5	-	NA	Q2G0G2	Uncharacterized protein YwhD	Uncharacterized protein			-0.18	0.07	0.03	-0.42	0.18	0.16	-0.61	-1.04	0.101397	0.0783072	0.000510227	0.999334	0.990596	0.216884	0.286373
SAOUHSC_00608	11	adh1	Rex	Q2G0G1	Carbohydrates / Fermentation / Fermentations: Lactate / Alcohol dehydrogenase (EC 1.1.1.1); Carbohydrates / Fermentation / Fermentations: Mixed acid / Alcohol dehydrogenase (EC 1.1.1.1); Fatty Acids, Lipids, and Isoprenoids / Phospholipids / Glycerolipid and Glycerophospholipid Metabolism in Bacteria / Alcohol dehydrogenase (EC 1.1.1.1)	Alcohol dehydrogenase (ADH) (EC 1.1.1.1)		K13953;	0.07	0.86	2.51	4.98	-0.07	4.07	3.95	5.73	0.00128608	0.000391769	7.61e-08	0.999334	0.000825584	0.266673	0.413946
SAOUHSC_00611	23	argS	NA	Q2G0F8	Protein Metabolism / Protein biosynthesis / tRNA aminoacylation, Arg / Arginyl-tRNA synthetase (EC 6.1.1.19)	Arginine--tRNA ligase (EC 6.1.1.19) (Arginyl-tRNA synthetase) (ArgRS)	arginyl-tRNA aminoacylation [GO:0006420]	K01887;	0.01	-0.05	-0.1	0.08	-0.01	-0.03	-0.13	-0.02	0.563419	0.404662	0.684546	0.999334	0.991136	0.889634	0.574716
SAOUHSC_00613	3	-	NA	Q2G0F6	putative iron ABC transporter	Iron compound ABC transporter, substrate-binding protein, putative		K02016;	0.01	-0.19	0.13	-0.1	-0.01	0.02	-0.62	-0.58	0.320838	0.357424	0.125786	0.999334	0.819131	0.502226	0.769004
SAOUHSC_00616	6	-	NA	Q2G0F3	Predicted hydrolase	Uncharacterized protein			0.02	-0.15	0.03	-0.11	-0.02	0.1	-0.24	-0.27	0.134992	0.618292	0.0486396	0.999334	0.318857	0.675001	0.890796
SAOUHSC_00619	2	-	SigB	Q2G0F0	hypothetical esterase/lipase [EC:3.1.-.-]	Uncharacterized protein			0.14	-1.15	0.11	-1.16	-0.14	-0.68	0.34	-0.83	0.579808	0.0111747	0.00112157	0.999334	0.448952	0.772389	0.652469
SAOUHSC_00620	7	sarA	SigB	Q2G2U9	Regulation and Cell signaling / Quorum sensing and biofilm formation / Biofilm formation in Staphylococcus / Staphylococcal accessory regulator A (SarA)	Transcriptional regulator SarA (Staphylococcal accessory regulator A)	pathogenesis [GO:0009405]; regulation of transcription, DNA-templated [GO:0006355]; transcription, DNA-templated [GO:0006351]		0.01	-0.05	-0.13	0.07	-0.01	-0.36	-0.17	-0.15	0.508527	0.532318	0.0559275	0.999334	0.40819	0.971036	0.801035
SAOUHSC_00634	14	mntC	NA	Q2G2D8	Manganese ABC transporter, periplasmic-binding protein SitA	ABC transporter, substrate-binding protein, putative	cell adhesion [GO:0007155]; metal ion transport [GO:0030001]	K19975;	-0.05	-0.44	-0.59	-1.34	0.05	0.46	-0.98	-1.27	0.00263775	0.00465603	2.34e-06	0.999334	0.023359	0.293959	0.978326
SAOUHSC_00637	7	mntA	NA	Q2G2L2	Manganese ABC transporter, ATP-binding protein SitB	Uncharacterized protein		K19973;	0.01	-0.28	-0.65	-0.54	-0.01	0.35	-0.6	-0.52	0.0713102	0.15961	6.13e-05	0.999334	0.0924755	0.878598	0.97337
SAOUHSC_00638	6	mntR	NA	Q2G2L0	Mn-dependent transcriptional regulator MntR	Uncharacterized protein	transcription, DNA-templated [GO:0006351]	K03709;	-0.1	-0.03	0.02	0.09	0.1	0.19	-0.14	-0.05	0.315941	0.696824	0.184036	0.999334	0.642944	0.552234	0.977138
SAOUHSC_00641	7	tagH	NA	Q2G2L1	Cell Wall and Capsule / Gram-Positive cell wall components / Teichoic and lipoteichoic acids biosynthesis / Teichoic acid export ATP-binding protein TagH (EC 3.6.3.40); CBSS-176280.1.peg.1561 / Teichoic acid export ATP-binding protein TagH (EC 3.6.3.40)	Teichoic acids export ATP-binding protein TagH (EC 3.6.3.40)		K09693;	-0.1	-0.02	-0.15	-0.31	0.1	0.11	-0.39	-0.33	0.354268	0.108439	0.0341369	0.999334	0.990596	0.340013	0.814727
SAOUHSC_00644	3	tagX	NA	O05154	Cell Wall and Capsule / Gram-Positive cell wall components / Teichoic and lipoteichoic acids biosynthesis / Teichoic acid biosynthesis protein X	Putative glycosyltransferase TagX (EC 2.4.-.-) (Teichoic acid biosynthesis protein X)	cell wall organization [GO:0071555]; regulation of cell shape [GO:0008360]; teichoic acid biosynthetic process [GO:0019350]		-0.19	-0.1	-0.83	0.63	0.19	0.47	-0.56	0.82	0.892833	0.0208407	0.0406418	0.999334	0.966175	0.765054	0.978326
SAOUHSC_00646	10	pbp4	NA	Q2G2X6	CBSS-84588.1.peg.1247 / D-alanyl-D-alanine carboxypeptidase (EC 3.4.16.4) / Penicillin binding protein PBP4; Murein Hydrolases / D-alanyl-D-alanine carboxypeptidase (EC 3.4.16.4) / Penicillin binding protein PBP4; Peptidoglycan Biosynthesis / D-alanyl-D-alanine carboxypeptidase (EC 3.4.16.4) / Penicillin binding protein PBP4	Penicillin-binding protein 4, putative		K07258;	0.02	0.21	0.17	0.27	-0.02	-0.16	-0.22	0.1	0.206821	0.203119	0.027515	0.999334	0.123603	0.405079	0.814789
SAOUHSC_00647	14	abcA	NA	Q2G2E5	Efflux ABC transporter, permease/ATP-binding protein	Uncharacterized protein		K18104;	0.03	-0.45	0.96	0.93	-0.03	-0.37	0.74	0.99	0.62483	5.17e-05	6.14e-05	0.999334	0.79888	0.794496	0.936441
SAOUHSC_00652	8	fhuC	Fur	Q2G1Z3	Stress Response / Stress Response - no subcategory / Flavohaemoglobin / Ferrichrome transport ATP-binding protein FhuC (TC 3.A.1.14.3)	Iron compound ABC transporter, ATP-binding protein		K02013;	0	0.81	0.18	-0.14	0	0.89	-0.2	-0.26	0.507984	0.00189985	0.000188297	0.999334	0.963355	0.40959	0.871858
SAOUHSC_00655	7	-	NA	Q2G1Z0	Carbohydrates / Central carbohydrate metabolism / Dihydroxyacetone kinases / Phosphoenolpyruvate-dihydroxyacetone phosphotransferase (EC 2.7.1.121), dihydroxyacetone binding subunit DhaK	Uncharacterized protein	glycerol metabolic process [GO:0006071]	K05878;	-0.16	0.01	2.96	3.31	0.16	-0.07	3.12	3.27	0.602035	3.62e-06	7.61e-08	0.999334	0.662796	0.929079	0.617683
SAOUHSC_00656	3	-	NA	Q2G0E9	Carbohydrates / Central carbohydrate metabolism / Dihydroxyacetone kinases / Phosphoenolpyruvate-dihydroxyacetone phosphotransferase (EC 2.7.1.121), ADP-binding subunit DhaL	Uncharacterized protein	glycerol metabolic process [GO:0006071]	K05879;	-0.21	-0.22	2.97	3.1	0.21	-0.96	3.27	3.38	0.462173	2.04e-05	4.08e-05	0.999334	0.41774	0.977165	0.997385
SAOUHSC_00659	2	-	NA	Q2G0E7	FIG01107983: hypothetical protein	Uncharacterized protein			-0.19	1.71	0.84	3.66	0.19	1.22	1.26	3.35	0.334226	0.051559	0.000370638	0.999334	0.911789	0.413813	0.979773
SAOUHSC_00661	2	-	NA	Q2G0E5	Lipase LipA	Uncharacterized protein	catabolic process [GO:0009056]		0.03	-0.26	-0.24	-0.21	-0.03	-0.23	-0.57	-1.71	0.120444	0.26168	0.00479607	0.999334	0.990596	0.996338	0.227262
SAOUHSC_00663	3	-	NA	Q2G0E2	Acetyltransferase GNAT family	Uncharacterized protein			-0.03	-0.14	0.15	0.33	0.03	0.27	0.61	0.53	0.566058	0.125902	0.00326528	0.999334	0.489548	0.476235	0.801035
SAOUHSC_00665	4	graR	NA	Q2G0E0	Virulence, Disease and Defense / Bacteriocins, ribosomally synthesized antibacterial peptides / Bacitracin Stress Response / Two-component response regulator BceR	Response regulator protein GraR (Glycopeptide resistance-associated protein R)	pathogenesis [GO:0009405]; phosphorelay signal transduction system [GO:0000160]; regulation of transcription, DNA-templated [GO:0006355]; response to antibiotic [GO:0046677]; transcription, DNA-templated [GO:0006351]	K19078;	0.01	-0.23	-0.33	-0.49	-0.01	-0.1	-0.29	-0.04	0.821842	0.31844	0.570485	0.999334	0.942613	0.996049	0.801035
SAOUHSC_00667	2	vraF	NA	Q2G0D8	Virulence, Disease and Defense / Bacteriocins, ribosomally synthesized antibacterial peptides / Bacitracin Stress Response / Bacitracin export ATP-binding protein BceA	ABC transporter ATP-binding protein, putative		K19079;	0	-0.18	-0.2	-1.4	0	0.17	-0.74	-0.91	0.529493	0.00670234	0.204658	0.999334	0.967533	0.553553	0.986013
SAOUHSC_00669	4	-	NA	Q2G0D6	UPF0111 protein YkaA, likely to be a phosphate transport regulator	Uncharacterized protein		K07220;	-0.08	0.19	-0.45	0.47	0.08	0.53	0.07	-0.76	0.333053	0.895626	0.0661036	0.999334	0.817564	0.933476	0.568421
SAOUHSC_00674	2	sarX	NA	Q2G0D1	FIG01108210: hypothetical protein	HTH-type transcriptional regulator SarX (Staphylococcal accessory regulator X)	pathogenesis [GO:0009405]; regulation of transcription, DNA-templated [GO:0006355]; transcription, DNA-templated [GO:0006351]		-0.16	-0.85	-0.05	-3.92	0.16	0.07	-1.1	-3.62	0.24728	0.0300667	0.000140407	0.999334	0.797238	0.386816	0.878526
SAOUHSC_00675	7	-	NA	Q2G0D0	Transcriptional regulatory protein YeeN	Probable transcriptional regulatory protein SAOUHSC_00675	regulation of transcription, DNA-templated [GO:0006355]; transcription, DNA-templated [GO:0006351]		0.03	0.07	-0.09	0.25	-0.03	0.14	0.14	0.37	0.531594	0.269805	0.0210745	0.999334	0.563373	0.413813	0.730627
SAOUHSC_00678	2	-	CodY	Q2G0C7	FIG01107967: hypothetical protein	Uncharacterized protein		K09145;	-0.74	1.24	2.18	1.9	0.74	2.15	2.03	2.26	0.420858	0.0153784	0.212032	0.999334	0.990596	0.365428	0.889158
SAOUHSC_00679	5	ccpE	NA	Q2G0C6	LysR family transcriptional regulator	Uncharacterized protein	transcription, DNA-templated [GO:0006351]		-0.03	-0.15	0.12	0.12	0.03	-0.14	0.01	-0.54	0.289875	0.328795	0.0813604	0.999334	0.980332	0.763593	0.320408
SAOUHSC_00686	6	-	SigB	Q2G0B9	FIG01107934: hypothetical protein	Uncharacterized protein			0.07	-0.71	-0.14	-0.49	-0.07	-0.43	0.36	-0.22	0.280148	0.0189925	0.00871112	0.999334	0.256373	0.37091	0.374341
SAOUHSC_00688	3	-	SigB	Q2G0B7	Lysine decarboxylase family	Cytokinin riboside 5'-monophosphate phosphoribohydrolase (EC 3.2.2.n1)	cytokinin biosynthetic process [GO:0009691]	K06966;	0.05	-0.67	0.04	0.2	-0.05	-0.56	0.56	0.29	0.864154	0.0500441	0.000239767	0.999334	0.767732	0.805471	0.977138
SAOUHSC_00690	2	-	SigB	Q2G0B5	FIG01108121: hypothetical protein	Uncharacterized protein			-0.1	-1.23	-0.12	-0.55	0.1	-0.33	-0.7	-0.68	0.0658307	0.0219598	0.00349971	0.999334	0.304607	0.345968	0.979773
SAOUHSC_00694	8	mgrA	NA	Q2G0B1	Transcriptional regulator MgrA (Regulator of autolytic activity)	HTH-type transcriptional regulator MgrA (Regulator of autolytic activity)	pathogenesis [GO:0009405]; regulation of transcription, DNA-templated [GO:0006355]; transcription, DNA-templated [GO:0006351]	K18906;	0.05	0.55	0.28	1.1	-0.05	0.32	0.34	1.09	0.903807	0.00533826	0.00148094	0.999334	0.976361	0.922089	0.931384
SAOUHSC_00695	2	-	NA	Q2G0B0	Putative metal chaperone, involved in Zn homeostasis, GTPase of COG0523 family	Uncharacterized protein			0.02	0.06	0.38	0.32	-0.02	0.3	-1.09	-0.27	0.165423	0.553639	0.00850967	0.999334	0.854787	0.284476	0.657427
SAOUHSC_00707	3	fruB	NA	Q2G238	Carbohydrates / Monosaccharides / Fructose utilization / 1-phosphofructokinase (EC 2.7.1.56)	Tagatose-6-phosphate kinase (EC 2.7.1.144)	carbohydrate phosphorylation [GO:0046835]; D-tagatose 6-phosphate catabolic process [GO:2001059]; lactose metabolic process [GO:0005988]	K00882;	-0.14	2.69	2.28	1.92	0.14	2.89	2.75	1.9	0.419704	1.76e-06	3.31e-06	0.999334	0.867569	0.945282	0.469584
SAOUHSC_00708	5	fruA	NA	Q2G239	Fructose utilization / PTS system, fructose-specific IIA component / PTS system, fructose-specific IIB component (EC 2.7.1.69) / PTS system, fructose-specific IIC component	Fructose specific permease, putative	phosphoenolpyruvate-dependent sugar phosphotransferase system [GO:0009401]	K02768;K02769;K02770;	-0.19	2.66	2.33	2.01	0.19	2.86	2.36	1.6	0.281666	6.88e-05	5.77e-06	0.999334	0.990596	0.971036	0.35987
SAOUHSC_00711	4	-	NA	Q2G2T9	Hemolysins and related proteins containing CBS domains	Uncharacterized protein			0.14	0.19	-0.57	0.68	-0.14	0.46	-0.77	-0.02	0.186063	0.011006	0.000986759	0.999334	0.410008	0.344806	0.903706
SAOUHSC_00712	9	-	NA	Q2G2T8	Carbohydrates / Monosaccharides / D-gluconate and ketogluconates metabolism / oxidoreductase of aldo/keto reductase family, subgroup 1	Uncharacterized protein			-0.08	-0.72	-0.46	-0.48	0.08	-0.43	-0.36	-0.67	0.149901	0.0150363	0.000388943	0.999334	0.767732	0.966611	0.336694
SAOUHSC_00714	4	saeS	SaeSR	Q2G2U1	Two component system histidine kinase (EC 2.7.3.-)	Histidine protein kinase SaeS (EC 2.7.13.3) (Sensor protein SaeS) (Staphylococcus exoprotein expression protein S)	pathogenesis [GO:0009405]	K10681;	0.06	0.14	0.31	1.18	-0.06	0.47	-0.24	1.1	0.577638	0.0734069	0.0244869	0.999334	0.496182	0.993574	0.878526
SAOUHSC_00715	4	saeR	SaeSR	Q2G2G2	Response regulator SaeR (Staphylococcus exoprotein expression protein R)	Response regulator SaeR (Staphylococcus exoprotein expression protein R)	pathogenesis [GO:0009405]; phosphorelay signal transduction system [GO:0000160]; regulation of transcription, DNA-templated [GO:0006355]; transcription, DNA-templated [GO:0006351]	K10682;	0.37	0.74	-0.35	2.25	-0.37	-0.5	0.36	2.32	0.890184	0.245085	0.0572113	0.999334	0.990596	0.855552	0.903706
SAOUHSC_00717	4	saeP	SaeSR	Q2G2G0	FIG01107853: hypothetical protein	Uncharacterized protein			-0.5	2.95	2.24	5.83	0.5	2.96	1.02	5.97	0.18717	2.86e-05	1.09e-06	0.742272	0.407512	0.12014	0.437044
SAOUHSC_00719	2	queE	SigB	Q2G1X7	Queuosine-Archaeosine Biosynthesis / 7-carboxy-7-deazaguanine synthase (EC 4.3.99.3)	7-carboxy-7-deazaguanine synthase (CDG synthase) (EC 4.3.99.3) (Queuosine biosynthesis protein QueE)	queuosine biosynthetic process [GO:0008616]	K10026;	-0.19	-0.06	-0.11	-1.33	0.19	-0.07	-1.21	-2.91	0.194138	0.0526003	0.00462593	0.999334	0.840656	0.229553	0.320408
SAOUHSC_00721	4	queC	NA	Q2G1X6	EC 6.3.4.- Ligases that form carbon-nitrogen bonds / 7-cyano-7-deazaguanine synthase (EC 6.3.4.20); Queuosine-Archaeosine Biosynthesis / 7-cyano-7-deazaguanine synthase (EC 6.3.4.20)	7-cyano-7-deazaguanine synthase (EC 6.3.4.20) (7-cyano-7-carbaguanine synthase) (PreQ(0) synthase) (Queuosine biosynthesis protein QueC)	queuosine biosynthetic process [GO:0008616]	K06920;	0	-0.2	-0.32	-1.12	0	-0.38	-0.3	-1.02	0.579808	0.00430199	3.72e-05	0.999334	0.644133	0.971036	0.903706
SAOUHSC_00726	5	-	NA	Q2G095	Allophanate hydrolase 2 and Biotin carboxylase cluster / Allophanate hydrolase 2 subunit 1 (EC 3.5.1.54); EC699-706 / Allophanate hydrolase 2 subunit 1 (EC 3.5.1.54)	Uncharacterized protein			-0.31	0.61	0.55	1.07	0.31	0.5	0.31	0.97	0.0561665	0.00533826	0.0036845	0.0851405	0.122895	0.0387772	0.205712
SAOUHSC_00727	7	-	NA	Q2G094	Allophanate hydrolase 2 and Biotin carboxylase cluster / Allophanate hydrolase 2 subunit 2 (EC 3.5.1.54); EC699-706 / Allophanate hydrolase 2 subunit 2 (EC 3.5.1.54)	Uncharacterized protein			0.08	0.18	-0.53	0.52	-0.08	0.12	-0.22	-0.08	0.569823	0.142777	0.185543	0.999334	0.944311	0.933476	0.657427
SAOUHSC_00728	10	ltaS	VraSR	Q2G093	Cell Wall and Capsule / Gram-Positive cell wall components / Polyglycerolphosphate lipoteichoic acid biosynthesis / Lipoteichoic acid synthase LtaS Type Ib	Lipoteichoic acid synthase [Cleaved into: Glycerol phosphate lipoteichoic acid synthase (LTA synthase) (EC 2.7.8.-) (Polyglycerol phosphate synthase); Processed glycerol phosphate lipoteichoic acid synthase]	cell wall organization [GO:0071555]; lipoteichoic acid biosynthetic process [GO:0070395]	K19005;	-0.01	-0.42	-1.53	0.13	0.01	-0.38	-0.74	0.11	0.585915	0.00199112	0.00243108	0.999334	0.913235	0.62595	0.997378
SAOUHSC_00729	4	-	NA	Q2G091	Cofactors, Vitamins, Prosthetic Groups, Pigments / Folate and pterines / Folate Biosynthesis / COG0488: ATPase components of ABC transporters with duplicated ATPase domains	ABC transporter, ATP-binding protein	valyl-tRNA aminoacylation [GO:0006438]	K15738;	-0.04	-0.04	-0.05	-0.12	0.04	0.03	-0.89	-0.57	0.234302	0.93015	0.0244626	0.999334	0.99928	0.229553	0.801035
SAOUHSC_00730	2	recQ1	NA	Q2G090	DNA Metabolism / DNA repair / DNA repair, bacterial RecFOR pathway / ATP-dependent DNA helicase RecQ; DNA Metabolism / DNA replication / DNA-replication / ATP-dependent DNA helicase RecQ	ATP-dependent DNA helicase RecQ (EC 3.6.1.-)	DNA recombination [GO:0006310]; DNA repair [GO:0006281]; DNA replication [GO:0006260]; SOS response [GO:0009432]	K03654;	0.01	-0.33	-0.73	-0.9	-0.01	-0.18	-0.74	-1.29	0.741153	0.131261	0.0607379	0.999334	0.989818	0.963673	0.8115
SAOUHSC_00731	6	opuBA	SigB	Q2G089	Stress Response / Osmotic stress / Choline and Betaine Uptake and Betaine Biosynthesis / Glycine betaine ABC transport system, ATP-binding protein OpuAA (EC 3.6.3.32)	ABC transporter domain protein		K05847;	-0.08	0.08	-0.02	1.14	0.08	0.02	-0.45	1.19	0.724056	0.000988528	0.00277253	0.999334	0.840656	0.55848	0.910615
SAOUHSC_00732	5	opuBB	SigB	Q2G088	Choline and Betaine Uptake and Betaine Biosynthesis / Glycine betaine ABC transport system, permease protein OpuAB / Glycine betaine ABC transport system, glycine betaine-binding protein OpuAC	Amino acid ABC transporter, permease protein, putative	nitrogen compound transport [GO:0071705]	K05845;K05846;	0.06	-0.14	-0.21	1.04	-0.06	-0.35	-0.43	0.89	0.470584	0.000104816	3.23e-06	0.999334	0.389693	0.548861	0.947117
SAOUHSC_00736	2	-	SigB	Q2G084	Transcription regulator [contains diacylglycerol kinase catalytic domain]	Putative lipid kinase SAOUHSC_00736 (EC 2.7.1.-)	phospholipid biosynthetic process [GO:0008654]		0.15	-0.62	0.06	-0.98	-0.15	-0.53	0.15	-0.76	0.750195	0.0864991	0.228312	0.999334	0.824907	0.993574	0.801035
SAOUHSC_00739	2	queF	NA	Q2G081	Queuosine-Archaeosine Biosynthesis / NADPH-dependent 7-cyano-7-deazaguanine reductase (EC 1.7.1.13)	NADPH-dependent 7-cyano-7-deazaguanine reductase (EC 1.7.1.13) (7-cyano-7-carbaguanine reductase) (NADPH-dependent nitrile oxidoreductase) (PreQ(0) reductase)	queuosine biosynthetic process [GO:0008616]	K09457;	-0.12	0.24	0.12	0.31	0.12	0.12	-0.13	0.34	0.812666	0.218426	0.549735	0.999334	0.821548	0.699562	0.977138
SAOUHSC_00742	25	nrdE	NA	Q2G078	Nucleosides and Nucleotides / Nucleosides and Nucleotides - no subcategory / Ribonucleotide reduction / Ribonucleotide reductase of class Ib (aerobic), alpha subunit (EC 1.17.4.1); Stress Response / Oxidative stress / Glutathione: Redox cycle / Ribonucleotide reductase of class Ib (aerobic), alpha subunit (EC 1.17.4.1)	Ribonucleoside-diphosphate reductase (EC 1.17.4.1)	DNA replication [GO:0006260]	K00525;	-0.03	-0.61	-1.32	-1.23	0.03	-0.42	-1.36	-1.2	0.417081	7.33e-05	3.37e-05	0.999334	0.650342	0.67172	0.997385
SAOUHSC_00743	11	nrdF	NA	Q2G077	Nucleosides and Nucleotides / Nucleosides and Nucleotides - no subcategory / Ribonucleotide reduction / Ribonucleotide reductase of class Ib (aerobic), beta subunit (EC 1.17.4.1)	Ribonucleotide-disphosphate reductase beta chain, putative (EC 1.17.4.1)	deoxyribonucleotide biosynthetic process [GO:0009263]	K00526;	0	-0.46	-0.57	-1.01	0	-0.26	-0.57	-1	0.187248	0.00103627	2.17e-05	0.999334	0.138236	0.912458	0.936859
SAOUHSC_00749	12	sstD	Fur	Q2G071	Iron acquisition and metabolism / Iron acquisition and metabolism - no subcategory / Heme, hemin uptake and utilization systems in GramPositives / Iron compound ABC uptake transporter substrate-binding protein; Iron acquisition and metabolism / Iron acquisition and metabolism - no subcategory / Iron acquisition in Streptococcus / Iron compound ABC uptake transporter substrate-binding protein	Uncharacterized protein	iron ion transport [GO:0006826]	K02016;	-0.35	1.72	0.55	-0.08	0.35	1.84	0.4	-0.36	0.315941	0.000388104	0.000105789	0.999334	0.383379	0.361566	0.336694
SAOUHSC_00751	2	-	NA	Q2G070	FIG01108317: hypothetical protein	Uncharacterized protein			0.24	-0.57	-0.81	-1.12	-0.24	-0.46	-1.37	-1.72	0.654317	0.00349422	0.0301507	0.999334	0.990596	0.777918	0.746225
SAOUHSC_00752	11	murB	NA	Q2G069	Cell Wall and Capsule / Cell Wall and Capsule - no subcategory / Peptidoglycan Biosynthesis / UDP-N-acetylenolpyruvoylglucosamine reductase (EC 1.1.1.158); Cell Wall and Capsule / Cell Wall and Capsule - no subcategory / UDP-N-acetylmuramate from Fructose-6-phosphate Biosynthesis / UDP-N-acetylenolpyruvoylglucosamine reductase (EC 1.1.1.158)	UDP-N-acetylenolpyruvoylglucosamine reductase (EC 1.3.1.98) (UDP-N-acetylmuramate dehydrogenase)	cell cycle [GO:0007049]; cell division [GO:0051301]; cell wall organization [GO:0071555]; peptidoglycan biosynthetic process [GO:0009252]; regulation of cell shape [GO:0008360]	K00075;	-0.01	0.02	0.03	0.08	0.01	0.03	-0.22	-0.15	0.298587	0.454754	0.131621	0.999334	0.990596	0.358183	0.620639
SAOUHSC_00754	3	-	NA	Q2G067	FIG01108064: hypothetical protein	Uncharacterized protein			0.03	-0.2	-1.03	-0.76	-0.03	-0.14	-2.29	-1.18	0.280148	0.00688534	7.8e-05	0.999334	0.980332	0.329816	0.910615
SAOUHSC_00755	3	-	NA	Q2G066	Uncharacterized protein YtxJ	Uncharacterized protein			0.25	-0.29	-0.2	-2.12	-0.25	-0.32	-1.64	-2.32	0.481402	0.0619486	0.00121084	0.999334	0.980332	0.500909	0.997385
SAOUHSC_00756	6	-	NA	Q2G065	Amino Acids and Derivatives / Alanine, serine, and glycine / Glycine and Serine Utilization / Glycerate kinase (EC 2.7.1.31); Carbohydrates / Monosaccharides / D-galactarate, D-glucarate and D-glycerate catabolism - gjo / Glycerate kinase (EC 2.7.1.31); Carbohydrates / Monosaccharides / D-galactarate, D-glucarate and D-glycerate catabolism / Glycerate kinase (EC 2.7.1.31); Carbohydrates / One-car…	Uncharacterized protein	organic acid phosphorylation [GO:0031388]	K00865;	-0.04	0.02	0	0.38	0.04	-0.17	0.26	0.29	0.468071	0.222311	0.0534357	0.999334	0.489089	0.894727	0.889158
SAOUHSC_00757	9	pepT	NA	Q2G064	Stress Response / Oxidative stress / Glutathione: Biosynthesis and gamma-glutamyl cycle / Tripeptide aminopeptidase (EC 3.4.11.4)	Peptidase T (EC 3.4.11.4) (Aminotripeptidase) (Tripeptidase) (Tripeptide aminopeptidase)	peptide metabolic process [GO:0006518]	K01258;	-0.04	-0.02	0.49	0.51	0.04	0.1	0.3	0.48	0.431102	0.0286784	0.00895864	0.999334	0.853511	0.609963	0.780224
SAOUHSC_00763	3	-	NA	Q2G059	Cofactors, Vitamins, Prosthetic Groups, Pigments / Tetrapyrroles / CPO analysis / FIG000605: protein co-occurring with transport systems (COG1739)	Uncharacterized protein			-0.19	0.45	-0.45	0.29	0.19	0.2	-2.76	-1.01	0.354268	0.0787825	0.0570626	0.999334	0.990596	0.339574	0.741125
SAOUHSC_00767	8	saHPF	CodY	Q2G055	Ribosome activity modulation / Ribosome hibernation promoting factor Hpf	Ribosome hibernation promotion factor (HPF) (Hibernation promoting factor SaHPF)	negative regulation of translational elongation [GO:0045900]; primary metabolic process [GO:0044238]		-0.04	-0.18	3.03	2.92	0.04	0.63	2.84	2.78	0.000980214	1.14e-06	8.82e-09	0.999334	0.00325057	0.808397	0.916147
SAOUHSC_00769	36	secA	NA	O06446	CBSS-393121.3.peg.2760 / Protein translocase subunit SecA	Protein translocase subunit SecA 1	protein import [GO:0017038]; protein targeting [GO:0006605]; protein transport by the Sec complex [GO:0043952]	K03070;	-0.05	0.02	0.06	0.18	0.05	0.08	-0.1	0.21	0.448459	0.314622	0.0432585	0.999334	0.990596	0.457943	0.997385
SAOUHSC_00771	2	prfB	NA	Q2G052	Protein Metabolism / Protein biosynthesis / Programmed frameshift / Peptide chain release factor 2; Protein Metabolism / Protein biosynthesis / Programmed frameshift / programmed frameshift-containing; Protein Metabolism / Protein biosynthesis / Translation termination factors bacterial / Peptide chain release factor 2; CBSS-393121.3.peg.2760 / Peptide chain release factor 2	Peptide chain release factor 2 (RF-2)		K02836;	-0.02	0.14	0.17	0.24	0.02	-0.17	-3.3	0.17	0.156924	0.460344	0.0171755	0.999334	0.980332	0.177062	0.990801
SAOUHSC_00776	5	uvrB	NA	Q2G050	DNA Metabolism / DNA repair / DNA repair, UvrABC system / Excinuclease ABC subunit B	Excinuclease ABC, B subunit	nucleotide-excision repair [GO:0006289]	K03702;	-0.24	0.11	0.34	0.59	0.24	-0.3	-0.38	0.42	0.341742	0.0996896	0.0165929	0.999334	0.538367	0.256744	0.801035
SAOUHSC_00779	3	uvrB2	NA	Q2G047	DNA Metabolism / DNA repair / DNA repair, UvrABC system / Excinuclease ABC subunit B	UvrABC system protein B	nucleotide-excision repair [GO:0006289]; SOS response [GO:0009432]	K03702;	0.13	0.05	0.35	0.44	-0.13	0.12	0.29	-0.21	0.468071	0.284052	0.379711	0.999334	0.882688	0.777918	0.775849
SAOUHSC_00780	16	uvrA	NA	Q2G046	DNA Metabolism / DNA repair / DNA repair, UvrABC system / Excinuclease ABC subunit A	UvrABC system protein A (UvrA protein) (Excinuclease ABC subunit A)	nucleotide-excision repair [GO:0006289]; SOS response [GO:0009432]	K03701;	0	0.07	0.05	-0.16	0	0.01	0.01	-0.26	0.821842	0.066936	0.0509488	0.999334	0.87442	0.688212	0.871723
SAOUHSC_00781	4	hprK	NA	Q2G045	Carbohydrates / Sugar alcohols / Mannitol Utilization / HPr kinase/phosphorylase (EC 2.7.1.-) (EC 2.7.4.-); Regulation and Cell signaling / Regulation and Cell signaling - no subcategory / HPr catabolite repression system / HPr kinase/phosphorylase (EC 2.7.1.-) (EC 2.7.4.-)	HPr kinase/phosphorylase (HPrK/P) (EC 2.7.11.-) (EC 2.7.4.-) (HPr(Ser) kinase/phosphorylase)	carbohydrate metabolic process [GO:0005975]; regulation of carbohydrate metabolic process [GO:0006109]	K06023;	-0.23	-0.18	0.43	1.14	0.23	-0.05	-0.07	0.98	0.668287	0.0236799	0.0258851	0.999334	0.819131	0.520283	0.801035
SAOUHSC_00785	10	trxB	NA	Q2G041	Nucleosides and Nucleotides / Pyrimidines / pyrimidine conversions / Thioredoxin reductase (EC 1.8.1.9); Sulfur Metabolism / Sulfur Metabolism - no subcategory / Thioredoxin-disulfide reductase / Thioredoxin reductase (EC 1.8.1.9)	Thioredoxin reductase (EC 1.8.1.9)	removal of superoxide radicals [GO:0019430]	K00384;	0.05	-0.23	-0.16	0.19	-0.05	-0.18	-0.13	0.28	0.839087	0.0210788	0.00245767	0.999334	0.738871	0.807581	0.814727
SAOUHSC_00787	6	-	NA	Q2G039	RNase adapter protein RapZ	Nucleotide-binding protein SAOUHSC_00787		K06958;	-0.06	-0.37	-0.13	0.56	0.06	-0.13	-0.02	0.6	0.437936	0.00241979	0.00420941	0.999334	0.649292	0.699393	0.979773
SAOUHSC_00788	4	-	SigB	Q2G038	FIG002813: LPPG:FO 2-phospho-L-lactate transferase like, CofD-like	Gluconeogenesis factor	regulation of cell shape [GO:0008360]		0.04	-0.71	0.11	0.12	-0.04	-0.73	-1.27	0.55	0.101397	0.0221629	0.00552504	0.999334	0.990596	0.203326	0.814727
SAOUHSC_00789	3	whiA	SigB	Q2G037	Cytoplasmic hypothetical protein DUF199	Putative sporulation transcription regulator WhiA	regulation of sporulation [GO:0043937]; regulation of transcription, DNA-templated [GO:0006355]; transcription, DNA-templated [GO:0006351]	K09762;	0.01	0.3	0.31	0.78	-0.01	0.1	0.75	0.44	0.536683	0.166587	0.0159597	0.999334	0.662796	0.819177	0.902562
SAOUHSC_00790	8	clpP	CtsR , SigB	Q2G036	Protein Metabolism / Protein degradation / Proteasome bacterial / ATP-dependent Clp protease proteolytic subunit (EC 3.4.21.92); Protein Metabolism / Protein degradation / Proteolysis in bacteria, ATP-dependent / ATP-dependent Clp protease proteolytic subunit (EC 3.4.21.92); Regulation and Cell signaling / Regulation and Cell signaling - no subcategory / cAMP signaling in bacteria / ATP-dependent…	ATP-dependent Clp protease proteolytic subunit (EC 3.4.21.92) (Endopeptidase Clp)		K01358;	0.06	-0.05	0.03	0.04	-0.06	0.01	0.16	0.33	0.512286	0.548435	0.0116152	0.999334	0.81006	0.699562	0.437044
SAOUHSC_00792	7	-	SigB	Q2G035	Cell division inhibitor Slr1223 (YfcH in EC), contains epimerase/dehydratase and DUF1731 domains	Epimerase family protein SAOUHSC_00792		K07071;	-0.04	-0.51	0.01	-0.28	0.04	-0.24	0.03	-0.53	0.361714	0.021387	0.0596001	0.999334	0.887855	0.992154	0.495728
SAOUHSC_00794	6	gapR	SigB	Q2G033	Central glycolytic genes regulator	Glycolytic operon regulator		K05311;	0.01	-0.16	-0.16	-0.29	-0.01	0.63	-1.27	0	0.0510925	0.17522	0.00616843	0.999334	0.383379	0.307811	0.754391
SAOUHSC_00795	16	gapA	SigB	Q2G032	Carbohydrates / Central carbohydrate metabolism / Glycolysis and Gluconeogenesis / NAD-dependent glyceraldehyde-3-phosphate dehydrogenase (EC 1.2.1.12); Cofactors, Vitamins, Prosthetic Groups, Pigments / Pyridoxine / Pyridoxin (Vitamin B6) Biosynthesis / NAD-dependent glyceraldehyde-3-phosphate dehydrogenase (EC 1.2.1.12); Stress Response / Oxidative stress / Glutaredoxins / NAD-dependent glycera…	Glyceraldehyde-3-phosphate dehydrogenase (EC 1.2.1.-)	glucose metabolic process [GO:0006006]	K00134;	0.01	-0.26	-0.31	0.14	-0.01	0.1	0.11	0.63	0.397707	0.053304	0.00549446	0.999334	0.33811	0.795609	0.445936
SAOUHSC_00796	17	pgk	SigB	Q2G031	Carbohydrates / Central carbohydrate metabolism / Glycolysis and Gluconeogenesis / Phosphoglycerate kinase (EC 2.7.2.3)	Phosphoglycerate kinase (EC 2.7.2.3)	glycolytic process [GO:0006096]	K00927;	0.01	-0.11	-0.44	0.27	-0.01	0.28	0.25	0.63	0.351595	0.17769	0.00426898	0.999334	0.279356	0.428722	0.449244
SAOUHSC_00797	17	tpiA	SigB	Q2G030	Carbohydrates / Central carbohydrate metabolism / Dihydroxyacetone kinases / Triosephosphate isomerase (EC 5.3.1.1); Carbohydrates / Central carbohydrate metabolism / Glycolysis and Gluconeogenesis / Triosephosphate isomerase (EC 5.3.1.1)	Triosephosphate isomerase (TIM) (TPI) (EC 5.3.1.1) (Triose-phosphate isomerase)	gluconeogenesis [GO:0006094]; glyceraldehyde-3-phosphate biosynthetic process [GO:0046166]; glycerol catabolic process [GO:0019563]; glycolytic process [GO:0006096]	K01803;	0.01	-0.14	-0.43	-0.06	-0.01	0.23	-0.25	-0.17	0.101397	0.0284369	0.00645072	0.999334	0.14446	0.795609	0.810664
SAOUHSC_00798	14	pgm	SigB	Q2G029	Carbohydrates / Central carbohydrate metabolism / Glycolysis and Gluconeogenesis / 2,3-bisphosphoglycerate-independent phosphoglycerate mutase (EC 5.4.2.1)	2,3-bisphosphoglycerate-independent phosphoglycerate mutase (BPG-independent PGAM) (Phosphoglyceromutase) (iPGM) (EC 5.4.2.12)	glucose catabolic process [GO:0006007]; glycolytic process [GO:0006096]	K15633;	-0.13	0.17	-0.49	-0.08	0.13	0.68	-0.38	-0.08	0.234302	0.519271	0.00114376	0.999334	0.60943	0.475256	0.901847
SAOUHSC_00799	23	eno	NA	Q2G028	Carbohydrates / Central carbohydrate metabolism / Dehydrogenase complexes / Enolase (EC 4.2.1.11); Carbohydrates / Central carbohydrate metabolism / Glycolysis and Gluconeogenesis / Enolase (EC 4.2.1.11); Carbohydrates / One-carbon Metabolism / Serine-glyoxylate cycle / Enolase (EC 4.2.1.11)	Enolase (EC 4.2.1.11) (2-phospho-D-glycerate hydro-lyase) (2-phosphoglycerate dehydratase)	glycolytic process [GO:0006096]; pathogenesis [GO:0009405]	K01689;	-0.01	-0.15	-0.07	0.52	0.01	0.04	0.13	0.7	0.539809	0.0150363	9.23e-05	0.999334	0.393212	0.883211	0.801035
SAOUHSC_00802	2	est	NA	Q2G025	Carboxylesterase (EC 3.1.1.1)	Carboxylesterase, putative (EC 3.1.1.1)	lipid metabolic process [GO:0006629]	K03928;	0	-0.04	-0.2	0.1	0	-2.39	-0.05	0.07	0.00263775	0.972155	0.000120026	0.999334	0.00430096	0.9695	0.986013
SAOUHSC_00803	14	rnr	NA	Q2G024	RNA Metabolism / RNA processing and modification / RNA processing and degradation, bacterial / 3'-to-5' exoribonuclease RNase R	Ribonuclease R (RNase R) (EC 3.1.13.1)		K12573;	-0.2	0.37	0.38	0.29	0.2	0.27	0.32	0.05	0.445329	0.192018	0.586472	0.999334	0.501108	0.415041	0.437044
SAOUHSC_00808	2	-	NA	Q2G019	Phages, Prophages, Transposable elements, Plasmids / Pathogenicity islands / Staphylococcal pathogenicity islands SaPI / Hypothetical SAV0808 homolog, near pathogenicity islands SaPI att-site	Uncharacterized protein			-0.1	-1.1	-5.49	-1.34	0.1	0.72	-5.61	-5.65	0.469005	0.00908095	0.0412181	0.999334	0.854787	0.894727	0.657427
SAOUHSC_00811	3	-	SigB	Q2G016	FIG01108786: hypothetical protein	Uncharacterized protein			-0.08	-0.1	0.09	-0.54	0.08	-0.28	-0.45	-0.92	0.511989	0.302361	0.0306158	0.999334	0.820235	0.40959	0.664938
SAOUHSC_00812	11	clfA	SigB , Agr/rot	Q2G015	Virulence, Disease and Defense / Adhesion / Adhesins in Staphylococcus / Clumping factor ClfA, fibrinogen-binding protein	Clumping factor A (Fibrinogen receptor A) (Fibrinogen-binding protein A)	aggregation of unicellular organisms [GO:0098630]; cell adhesion [GO:0007155]; pathogenesis [GO:0009405]	K14201;	0.04	-0.71	-1.58	-1.72	-0.04	-0.69	-1.41	-1.26	0.33046	0.00372061	0.000177855	0.999334	0.854787	0.975378	0.388653
SAOUHSC_00819	4	cspC	NA	Q2G009	Cold shock, CspA family of proteins / Cold shock protein of CSP family	Uncharacterized protein	regulation of transcription, DNA-templated [GO:0006355]	K03704;	-0.01	0.31	0.99	0.33	0.01	0.78	1.24	0.44	0.888259	0.415278	0.278827	0.999334	0.993555	0.855552	0.949976
SAOUHSC_00821	2	-	SigB	Q2G007	FIG01108459: hypothetical protein	Uncharacterized protein			0.14	-1.42	-0.96	-3.95	-0.14	-0.78	-0.35	-4.19	0.280148	0.000279961	3.36e-06	0.999334	0.381572	0.605778	0.90911
SAOUHSC_00830	3	-	NA	Q2G1T4	FIG01108288: hypothetical protein	Uncharacterized protein			0.06	0.2	0.32	0.27	-0.06	0.48	-0.24	0.5	0.277459	0.8003	0.0183692	0.999334	0.843026	0.678048	0.60932
SAOUHSC_00831	3	ohr	SigB	Q2G1T3	Stress Response / Oxidative stress / Oxidative stress / Organic hydroperoxide resistance protein; CBSS-269482.1.peg.1294 / Organic hydroperoxide resistance protein	Organic hydroperoxide resistance protein-like	response to oxidative stress [GO:0006979]		0.02	-0.84	-0.67	-0.78	-0.02	-0.6	0.21	-0.67	0.602035	0.0226371	0.180265	0.999334	0.657698	0.475733	0.891338
SAOUHSC_00832	2	aroD	NA	Q2G002	Amino Acids and Derivatives / Aromatic amino acids and derivatives / Chorismate Synthesis / 3-dehydroquinate dehydratase I (EC 4.2.1.10); Amino Acids and Derivatives / Aromatic amino acids and derivatives / Common Pathway For Synthesis of Aromatic Compounds (DAHP synthase to chorismate) / 3-dehydroquinate dehydratase I (EC 4.2.1.10); Metabolism of Aromatic Compounds / Peripheral pathways for cata…	3-dehydroquinate dehydratase (3-dehydroquinase) (EC 4.2.1.10) (Type I DHQase) (Type I dehydroquinase) (DHQ1)	aromatic amino acid family biosynthetic process [GO:0009073]; chorismate biosynthetic process [GO:0009423]	K03785;	-0.05	-0.08	-0.03	0.53	0.05	-0.11	0.36	0.61	0.483877	0.130684	0.00048799	0.999334	0.990596	0.452072	0.890796
SAOUHSC_00833	4	-	Fur	Q2G001	Cofactors, Vitamins, Prosthetic Groups, Pigments / Tetrapyrroles / CPO analysis / Putative nitroreductase family protein SACOL0874	Uncharacterized protein			-0.17	1.18	0.78	0.88	0.17	1.24	0.06	0.51	0.424199	0.00165884	0.0301411	0.999334	0.692478	0.319447	0.700963
SAOUHSC_00834	2	-	NA	Q2G000	Thioredoxin	Thioredoxin, putative	cell redox homeostasis [GO:0045454]; cellular response to oxidative stress [GO:0034599]; glycerol ether metabolic process [GO:0006662]		0.02	-0.52	-0.63	-0.49	-0.02	-0.37	-0.63	-0.37	0.658479	0.0029189	0.00908494	0.999334	0.489548	0.894727	0.902562
SAOUHSC_00835	5	-	NA	Q2FZZ9	Anaerobic respiratory reductases / FIG138056: a glutathione-dependent thiol reductase; Arsenic resistance / FIG138056: a glutathione-dependent thiol reductase	Uncharacterized protein			0	-0.1	0.47	0.9	0	0.14	0.57	0.75	0.101397	0.00027724	0.000158245	0.999334	0.165413	0.883211	0.790622
SAOUHSC_00836	2	gcvH	NA	Q2FZZ8	Amino Acids and Derivatives / Alanine, serine, and glycine / Glycine and Serine Utilization / Glycine cleavage system H protein; Amino Acids and Derivatives / Alanine, serine, and glycine / Glycine cleavage system / Glycine cleavage system H protein	Glycine cleavage system H protein (Octanoyl/lipoyl carrier protein)	glycine decarboxylation via glycine cleavage system [GO:0019464]	K02437;	0.03	-0.31	0.02	-0.58	-0.03	-0.09	-0.01	-0.67	0.733596	0.0535371	0.000464441	0.999334	0.620005	0.81314	0.987719
SAOUHSC_00838	3	-	NA	Q2FZZ6	FIG01108697: hypothetical protein	Uncharacterized protein			-0.12	-0.08	0.61	-0.45	0.12	0.72	0.72	-0.12	0.391128	0.0165761	0.249817	0.999334	0.52957	0.77336	0.90911
SAOUHSC_00841	2	-	SigB	Q2FZZ3	Thioredoxin	Uncharacterized protein	cell redox homeostasis [GO:0045454]; cellular response to oxidative stress [GO:0034599]; glycerol ether metabolic process [GO:0006662]		0.66	4.04	3.96	4.21	-0.66	3.56	1.08	4.56	0.409367	0.00738675	0.00724489	0.999334	0.649397	0.345968	0.946259
SAOUHSC_00842	4	metN1	CodY , SigB	Q2FZZ2	Amino Acids and Derivatives / Lysine, threonine, methionine, and cysteine / Methionine Biosynthesis / Methionine ABC transporter ATP-binding protein; Amino Acids and Derivatives / Lysine, threonine, methionine, and cysteine / Methionine Degradation / Methionine ABC transporter ATP-binding protein	Methionine import ATP-binding protein MetN 2 (EC 3.6.3.-)	methionine transport [GO:0015821]	K02071;	-0.01	-0.13	0.24	0.62	0.01	0.01	-0.13	0.35	0.539567	0.032468	0.528727	0.999334	0.990596	0.576111	0.801035
SAOUHSC_00844	6	metQ1	CodY , SigB	Q2FZZ0	Amino Acids and Derivatives / Lysine, threonine, methionine, and cysteine / Methionine Biosynthesis / Methionine ABC transporter substrate-binding protein; Amino Acids and Derivatives / Lysine, threonine, methionine, and cysteine / Methionine Degradation / Methionine ABC transporter substrate-binding protein; Phages, Prophages, Transposable elements, Plasmids / Pathogenicity islands / Staphylococ…	Lipoprotein		K02073;	0.16	-0.69	0.05	0.94	-0.16	-0.18	0.28	0.47	0.0841217	0.00128341	0.0145355	0.999334	0.147185	0.40959	0.850383
SAOUHSC_00845	7	-	SigB	Q2FZY9	FIG01108089: hypothetical protein	UPF0337 protein SAOUHSC_00845			0.01	-1.07	-0.69	-1.87	-0.01	-0.67	0.02	-1.07	0.507635	0.00386261	0.00277253	0.999334	0.722198	0.587165	0.437044
SAOUHSC_00847	15	sufC	PerR , SigB	Q2FZY7	Iron-sulfur cluster assembly ATPase protein SufC	ABC transporter, ATP-binding protein, putative		K09013;	0.08	-0.32	-0.18	-0.55	-0.08	-0.42	-0.11	-0.54	0.458596	0.0509861	0.00408287	0.999334	0.990342	0.452072	0.910615
SAOUHSC_00848	15	sufD	PerR , SigB	Q2FZY6	Iron-sulfur cluster assembly protein SufD	Uncharacterized protein	iron-sulfur cluster assembly [GO:0016226]	K09015;	0.04	-0.25	-0.13	-0.45	-0.04	-0.41	-0.22	-0.63	0.737256	0.0235837	6.14e-05	0.999334	0.990596	0.754354	0.941055
SAOUHSC_00849	12	sufS	PerR , SigB	Q2FZY5	Alanine biosynthesis / Cysteine desulfurase (EC 2.8.1.7) => SufS; CBSS-393130.3.peg.794 / Cysteine desulfurase (EC 2.8.1.7) => SufS; tRNA modification Archaea / Cysteine desulfurase (EC 2.8.1.7) => SufS	Cysteine desulfurase (EC 2.8.1.7)	cysteine metabolic process [GO:0006534]	K11717;	0.03	-0.36	-0.21	-0.57	-0.03	-0.37	-0.54	-0.62	0.456775	0.00870129	0.00824633	0.999334	0.735074	0.474074	0.970543
SAOUHSC_00850	4	sufU	PerR , SigB	Q2FZY4	Putative iron-sulfur cluster assembly scaffold protein for SUF system, SufE2	Uncharacterized protein	cellular iron ion homeostasis [GO:0006879]; iron-sulfur cluster assembly [GO:0016226]; protein maturation by iron-sulfur cluster transfer [GO:0097428]	K04488;	-0.03	-0.73	-0.86	-1.24	0.03	-0.79	-0.88	-1.23	0.740865	0.00165849	0.00052576	0.999334	0.824907	0.94698	0.902562
SAOUHSC_00851	15	sufB	PerR , SigB	Q2FZY3	Sulfur Metabolism / Organic sulfur assimilation / At5g37530 (CsdL protein family) / Iron-sulfur cluster assembly protein SufB	UPF0051 protein SAOUHSC_00851	iron-sulfur cluster assembly [GO:0016226]	K09014;	0	-0.37	-0.38	-0.68	0	-0.41	-0.35	-0.67	0.609924	0.00847679	0.000362167	0.999334	0.677939	0.894727	0.871723
SAOUHSC_00861	10	lipA	NA	Q2FZX4	Lipoic acid metabolism / Lipoyl synthase (EC 2.8.1.8)	Lipoyl synthase (EC 2.8.1.8) (Lip-syn) (LS) (Lipoate synthase) (Lipoic acid synthase) (Sulfur insertion protein LipA)	lipoate biosynthetic process [GO:0009107]; protein lipoylation [GO:0009249]	K03644;	-0.11	-0.32	-1.55	-0.73	0.11	0.06	-0.97	-0.7	0.431015	0.00822073	0.00019686	0.999334	0.687553	0.807275	0.801035
SAOUHSC_00863	2	-	NA	Q2FZX2	Arginine Biosynthesis extended / hypothetical protein	Uncharacterized protein			-0.03	-0.37	-0.48	-0.3	0.03	-0.42	-0.16	-0.18	0.805979	0.381863	0.189625	0.999334	0.877884	0.850847	0.970543
SAOUHSC_00864	6	-	NA	Q2FZX1	BH3430 unknown conserved protein	Uncharacterized protein			-0.08	-0.23	-0.35	-0.58	0.08	0.1	-0.5	-0.59	0.275938	0.0122528	0.0024796	0.999334	0.54912	0.604887	0.911192
SAOUHSC_00865	5	-	NA	Q2FZX0	Hypothetical NagD-like phosphatase	Acid sugar phosphatase (EC 3.1.3.-)			0.06	-0.01	-0.04	0.5	-0.06	0.34	-0.05	0.16	0.514835	0.219021	0.134608	0.999334	0.697755	0.94698	0.814727
SAOUHSC_00866	8	-	NA	Q2FZW9	Glycerate metabolism / Glyoxylate reductase (EC 1.1.1.79) / Glyoxylate reductase (EC 1.1.1.26) / Hydroxypyruvate reductase (EC 1.1.1.81); Glycolate, glyoxylate interconversions / Glyoxylate reductase (EC 1.1.1.79) / Glyoxylate reductase (EC 1.1.1.26) / Hydroxypyruvate reductase (EC 1.1.1.81)	D-isomer specific 2-hydroxyacid dehydrogenase, NAD binding domain protein			0.05	-0.02	-0.03	0.14	-0.05	0.06	-0.01	0.07	0.688841	0.490067	0.650573	0.999334	0.957619	0.826407	0.801035
SAOUHSC_00869	13	dltA	NA	Q2FZW6	Cell Wall and Capsule / Gram-Positive cell wall components / D-Alanyl Lipoteichoic Acid Biosynthesis / D-alanine--poly(phosphoribitol) ligase subunit 1 (EC 6.1.1.13); Cell Wall and Capsule / Gram-Positive cell wall components / Teichoic and lipoteichoic acids biosynthesis / D-alanine--poly(phosphoribitol) ligase subunit 1 (EC 6.1.1.13)	D-alanine--D-alanyl carrier protein ligase (DCL) (EC 6.2.1.-) (D-alanine--poly(phosphoribitol) ligase subunit 1) (D-alanine-activating enzyme) (DAE)	lipoteichoic acid biosynthetic process [GO:0070395]	K03367;	0	0.22	0.09	-0.49	0	0.1	-0.09	-0.65	0.676401	0.00241979	7.61e-05	0.999334	0.548553	0.737358	0.730627
SAOUHSC_00871	2	dltC	NA	Q2FZW4	D-Alanyl Lipoteichoic Acid Biosynthesis / D-alanine--poly(phosphoribitol) ligase ACP subunit (EC 6.1.1.13); Teichoic and lipoteichoic acids biosynthesis / D-alanine--poly(phosphoribitol) ligase ACP subunit (EC 6.1.1.13)	D-alanyl carrier protein (DCP) (D-alanine--poly(phosphoribitol) ligase subunit 2)	cell wall organization [GO:0071555]; lipoteichoic acid biosynthetic process [GO:0070395]	K14188;	0.01	0.33	0	-0.5	-0.01	0.22	0.13	-0.34	0.649529	0.0106082	0.0141398	0.999334	0.97224	0.628172	0.924306
SAOUHSC_00872	10	dltD	NA	Q2FZW3	Cell Wall and Capsule / Gram-Positive cell wall components / D-Alanyl Lipoteichoic Acid Biosynthesis / Poly(glycerophosphate chain) D-alanine transfer protein DltD; Cell Wall and Capsule / Gram-Positive cell wall components / Teichoic and lipoteichoic acids biosynthesis / Poly(glycerophosphate chain) D-alanine transfer protein DltD	Protein DltD	lipoteichoic acid biosynthetic process [GO:0070395]	K03740;	-0.04	0.32	0.11	-0.03	0.04	0.14	0.25	-0.29	0.30341	0.0596757	0.00947366	0.999334	0.607478	0.993574	0.374341
SAOUHSC_00873	3	nfu	NA	Q2FZW2	Sulfur Metabolism / Organic sulfur assimilation / At5g37530 (CsdL protein family) / NifU-like domain protein	Uncharacterized protein	iron-sulfur cluster assembly [GO:0016226]		-0.06	-0.24	-1.22	-1.53	0.06	-0.31	-0.89	-1.14	0.223021	0.00086233	9.28e-05	0.999334	0.657698	0.606206	0.60932
SAOUHSC_00874	2	-	NA	Q2FZW1	YuzD-like protein	Uncharacterized protein			0.05	-0.31	-0.14	-1.6	-0.05	0.01	-0.79	-1.99	0.587735	0.0773789	0.0141398	0.999334	0.966175	0.59609	0.970543
SAOUHSC_00875	12	-	NA	Q2FZW0	Respiration / Electron donating reactions / Respiratory dehydrogenases 1 / NADH dehydrogenase (EC 1.6.99.3)	Uncharacterized protein			0.06	-0.87	-0.06	-0.8	-0.06	-0.45	-0.22	-0.76	0.0683429	0.00113093	0.000232901	0.999334	0.0964407	0.883166	0.996537
SAOUHSC_00877	2	-	NA	Q2FZV8	probable iron binding protein from the HesB_IscA_SufA family	Uncharacterized protein	protein maturation by iron-sulfur cluster transfer [GO:0097428]	K13628;	-0.04	-0.45	-1.09	-2.01	0.04	-0.37	-1.33	-2.32	0.556606	0.0016645	3.5e-06	0.999334	0.692478	0.935553	0.859173
SAOUHSC_00878	16	ndh2	NA	Q2FZV7	Respiration / Electron donating reactions / Respiratory dehydrogenases 1 / NADH dehydrogenase (EC 1.6.99.3)	NADH dehydrogenase-like protein SAOUHSC_00878 (EC 1.6.99.-)	aerobic electron transport chain [GO:0019646]	K03885;	0.02	-0.21	-0.21	-0.17	-0.02	-0.14	-0.15	-0.27	0.553171	0.323221	0.106117	0.999334	0.6628	0.799074	0.903706
SAOUHSC_00889	2	mnhA	NA	Q2FZV1	Membrane Transport / Uni- Sym- and Antiporters / Sodium Hydrogen Antiporter / Na(+) H(+) antiporter subunit A (TC 2.A.63.1.3)	Na(+)/H(+) antiporter subunit A1 (Mnh complex subunit A1)	ATP synthesis coupled electron transport [GO:0042773]; cellular monovalent inorganic cation homeostasis [GO:0030004]; sodium ion transport [GO:0006814]	K05565;	-0.07	0.13	0.05	0.64	0.07	0.41	-0.16	-1.39	0.0794486	0.0619539	0.0141986	0.999334	0.989818	0.976565	0.169803
SAOUHSC_00890	3	kapB	NA	Q2FZV0	FIG01107890: hypothetical protein	Uncharacterized protein		K06347;	-0.11	0.07	0.56	1.07	0.11	0	-0.47	0.93	0.552202	0.766131	0.0771274	0.999334	0.584428	0.457943	0.903706
SAOUHSC_00891	7	-	NA	Q2FZU9	RNA Metabolism / RNA processing and modification / Queuosine-Archaeosine Biosynthesis / Peptidyl-prolyl cis-trans isomerase (EC 5.2.1.8)	Putative peptidyl-prolyl cis-trans isomerase (PPIase) (EC 5.2.1.8) (Rotamase)		K03768;	0.02	0.07	-0.17	0.17	-0.02	0.05	0.08	0.13	0.0393825	0.0218139	0.571802	0.999334	0.938878	0.127579	0.727552
SAOUHSC_00893	2	-	NA	Q2FZU7	Putative NADH-dependent flavin oxidoreductase	FMN oxidoreductase, putative			-0.18	-0.24	-0.22	0.39	0.18	-0.1	-4.12	-3.01	0.0423326	0.93843	0.00158265	0.999334	0.990596	0.0892497	0.235019
SAOUHSC_00894	9	rocD	NA	Q2FZU6	Amino Acids and Derivatives / Arginine; urea cycle, polyamines / Arginine and Ornithine Degradation / Ornithine aminotransferase (EC 2.6.1.13)	Ornithine aminotransferase (OAT) (EC 2.6.1.13) (Ornithine--oxo-acid aminotransferase)	L-proline biosynthetic process [GO:0055129]	K00819;	0	-0.82	1.2	1.16	0	-0.33	1.46	1.6	0.25723	4.76e-05	8.87e-07	0.999334	0.165413	0.558819	0.388653
SAOUHSC_00895	3	gudB	NA	Q2FZU5	Amino Acids and Derivatives / Glutamine, glutamate, aspartate, asparagine; ammonia assimilation / Glutamate dehydrogenases / NAD-specific glutamate dehydrogenase (EC 1.4.1.2); Amino Acids and Derivatives / Glutamine, glutamate, aspartate, asparagine; ammonia assimilation / Glutamine, Glutamate, Aspartate and Asparagine Biosynthesis / NAD-specific glutamate dehydrogenase (EC 1.4.1.2)	Glutamate dehydrogenase	cellular amino acid metabolic process [GO:0006520]	K00260;	0.23	-0.7	3.1	3.43	-0.23	0.75	2.2	3.03	0.0189992	0.000398967	0.000680409	0.999334	0.0446446	0.600631	0.997385
SAOUHSC_00899	6	argG	CodY	Q2FZU1	Amino Acids and Derivatives / Arginine; urea cycle, polyamines / Arginine Biosynthesis extended / Argininosuccinate synthase (EC 6.3.4.5); Miscellaneous / Miscellaneous - no subcategory / EC 6.3.4.- Ligases that form carbon-nitrogen bonds / Argininosuccinate synthase (EC 6.3.4.5)	Argininosuccinate synthase (EC 6.3.4.5) (Citrulline--aspartate ligase)	arginine biosynthetic process [GO:0006526]; argininosuccinate metabolic process [GO:0000053]; urea cycle [GO:0000050]	K01940;	-0.16	0.4	1.01	1.77	0.16	0.57	0.12	2.06	0.40146	0.00336055	0.00743037	0.999334	0.990596	0.475733	0.921201
SAOUHSC_00900	8	pgi	NA	Q2FZU0	Carbohydrates / Central carbohydrate metabolism / Glycolysis and Gluconeogenesis / Glucose-6-phosphate isomerase (EC 5.3.1.9); Carbohydrates / One-carbon Metabolism / Formaldehyde assimilation: Ribulose monophosphate pathway / Glucose-6-phosphate isomerase (EC 5.3.1.9)	Glucose-6-phosphate isomerase (GPI) (EC 5.3.1.9) (Phosphoglucose isomerase) (PGI) (Phosphohexose isomerase) (PHI)	gluconeogenesis [GO:0006094]; glycolytic process [GO:0006096]	K01810;	-0.15	-0.67	-0.22	0.62	0.15	-0.17	-0.37	-0.11	0.11231	0.0279441	0.162233	0.999334	0.892232	0.475733	0.23812
SAOUHSC_00903	10	spsB	NA	Q2FZT7	Protein Metabolism / Protein processing and modification / Signal peptidase / Signal peptidase I (EC 3.4.21.89); CBSS-176299.4.peg.1292 / Signal peptidase I (EC 3.4.21.89)	Signal peptidase I (EC 3.4.21.89)	signal peptide processing [GO:0006465]	K03100;	0.03	-0.14	-0.2	0.75	-0.03	-0.23	-0.2	0.59	0.769103	0.000262261	7.32e-06	0.999334	0.99928	0.842522	0.890796
SAOUHSC_00904	6	addB	NA	Q2FZT6	DNA Metabolism / DNA repair / ATP-dependent Nuclease / ATP-dependent nuclease, subunit B	ATP-dependent helicase/deoxyribonuclease subunit B (EC 3.1.-.-) (EC 3.6.4.12) (ATP-dependent helicase/nuclease AddB)	double-strand break repair via homologous recombination [GO:0000724]	K16899;	0.06	0.09	0.29	0.48	-0.06	0.37	-0.27	0.3	0.577638	0.106632	0.26288	0.999334	0.57307	0.942892	0.987719
SAOUHSC_00905	9	addA	NA	Q2FZT5	DNA Metabolism / DNA repair / ATP-dependent Nuclease / ATP-dependent nuclease, subunit A	ATP-dependent helicase/nuclease subunit A (EC 3.1.-.-) (EC 3.6.4.12) (ATP-dependent helicase/nuclease AddA)	double-strand break repair [GO:0006302]	K16898;	-0.05	-0.13	0.09	0.31	0.05	0.14	0.22	0.5	0.495137	0.0640418	0.0193246	0.999334	0.388207	0.467931	0.801035
SAOUHSC_00906	15	-	NA	Q2FZT4	Metabolism of Aromatic Compounds / Metabolism of Aromatic Compounds - no subcategory / Gentisate degradation / Fumarylacetoacetate hydrolase family protein; Metabolism of Aromatic Compounds / Metabolism of central aromatic intermediates / Salicylate and gentisate catabolism / Fumarylacetoacetate hydrolase family protein	Uncharacterized protein SAOUHSC_00906	metabolic process [GO:0008152]		-0.01	-0.15	0.08	0.44	0.01	-0.06	0.04	0.41	0.769103	0.0122652	0.00221318	0.999334	0.810461	0.942837	0.931932
SAOUHSC_00908	14	cdr	NA	O52582	CoA-disulfide reductase (EC 1.8.1.14)	Coenzyme A disulfide reductase (CoA-disulfide reductase) (CoADR) (EC 1.8.1.14)	cell redox homeostasis [GO:0045454]	K08255;	-0.04	-0.14	-0.02	0.41	0.04	-0.03	0.11	0.39	0.796515	0.0128543	0.00608291	0.999334	0.729966	0.945875	0.978326
SAOUHSC_00909	10	-	NA	Q2FZT1	FIG002540: Haloacid dehalogenase-like hydrolase	Uncharacterized protein		K21064;	-0.02	-0.04	-0.09	0.03	0.02	-0.05	-0.15	0.12	0.75093	0.491389	0.0415927	0.999334	0.854787	0.909975	0.871723
SAOUHSC_00910	2	sufT	NA	Q2FZT0	PaaD-like protein (DUF59) involved in Fe-S cluster assembly	Uncharacterized protein			-0.08	-0.44	-0.8	-1.1	0.08	-0.34	-0.64	-0.26	0.528284	0.126897	0.522471	0.999334	0.963074	0.993574	0.657427
SAOUHSC_00912	29	clpB	CtsR	Q2FZS8	Protein Metabolism / Protein degradation / Proteolysis in bacteria, ATP-dependent / ClpB protein; Protein Metabolism / Protein folding / Protein chaperones / ClpB protein	Chaperone protein ClpB	protein refolding [GO:0042026]; response to heat [GO:0009408]	K03695;	-0.01	0.41	0.29	0.22	0.01	0.14	0.32	0.29	0.441617	0.086742	0.106673	0.999334	0.649292	0.805471	0.878526
SAOUHSC_00917	2	-	NA	Q2FZS3	Phospholipid-binding protein	Uncharacterized protein		K06910;	-0.12	0.16	-0.12	0.43	0.12	0.08	-0.32	0.29	0.441617	0.0263847	0.0206423	0.999334	0.453218	0.405079	0.473503
SAOUHSC_00920	8	fabH	NA	Q2FZS0	Fatty Acids, Lipids, and Isoprenoids / Fatty acids / Fatty Acid Biosynthesis FASII / 3-oxoacyl-[acyl-carrier-protein] synthase, KASIII (EC 2.3.1.180); COG1399 / 3-oxoacyl-[acyl-carrier-protein] synthase, KASIII (EC 2.3.1.180)	3-oxoacyl-[acyl-carrier-protein] synthase 3 (EC 2.3.1.180) (3-oxoacyl-[acyl-carrier-protein] synthase III) (Beta-ketoacyl-ACP synthase III) (KAS III)	fatty acid biosynthetic process [GO:0006633]	K00648;	-0.14	0.72	0.42	0.23	0.14	0.67	0.52	0.47	0.949794	0.0222629	0.00652494	0.999334	0.892407	0.894727	0.997385
SAOUHSC_00921	13	fabF	NA	Q2FZR9	Fatty Acids, Lipids, and Isoprenoids / Fatty acids / Fatty Acid Biosynthesis FASII / 3-oxoacyl-[acyl-carrier-protein] synthase, KASII (EC 2.3.1.179); COG1399 / 3-oxoacyl-[acyl-carrier-protein] synthase, KASII (EC 2.3.1.179)	3-oxoacyl-[acyl-carrier-protein] synthase 2 (EC 2.3.1.179)	fatty acid biosynthetic process [GO:0006633]	K09458;	-0.06	0.53	0.28	-0.06	0.06	0.42	0.48	0.22	0.223021	0.024758	0.00142908	0.999334	0.79888	0.666119	0.424758
SAOUHSC_00925	3	opp-3D	CodY	Q2FZR5	Membrane Transport / ABC transporters / ABC transporter oligopeptide (TC 3.A.1.5.1) / Oligopeptide transport ATP-binding protein OppD (TC 3.A.1.5.1)	Uncharacterized protein	peptide transport [GO:0015833]	K15583;	-0.16	-0.49	1.3	1.51	0.16	0.27	1.36	1.18	0.33003	0.000306324	0.00342986	0.999334	0.40819	0.978307	0.887487
SAOUHSC_00926	3	opp-3F	CodY	Q2FZR4	Membrane Transport / ABC transporters / ABC transporter oligopeptide (TC 3.A.1.5.1) / Oligopeptide transport ATP-binding protein OppF (TC 3.A.1.5.1)	Oligopeptide ABC transporter, ATP-binding protein, putative	peptide transport [GO:0015833]	K10823;	-0.02	-0.37	1.18	1.17	0.02	0.18	1.37	0.71	0.101397	0.00857571	2.07e-05	0.999334	0.122895	0.78495	0.887487
SAOUHSC_00927	2	opp-3A	CodY	Q2FZR3	Membrane Transport / ABC transporters / ABC transporter oligopeptide (TC 3.A.1.5.1) / Oligopeptide ABC transporter, periplasmic oligopeptide-binding protein OppA (TC 3.A.1.5.1); Regulation and Cell signaling / Regulation and Cell signaling - no subcategory / Sex pheromones in Enterococcus faecalis and other Firmicutes / Oligopeptide ABC transporter, periplasmic oligopeptide-binding protein OppA (…	Oligopeptide ABC transporter, substrate-binding protein, putative	transmembrane transport [GO:0055085]	K15580;	-0.18	0.06	1.96	1.95	0.18	0.76	1.62	1.99	0.275938	0.0348193	0.00846221	0.999334	0.28348	0.946462	0.931932
SAOUHSC_00933	10	trpS	NA	Q2FZQ7	Protein Metabolism / Protein biosynthesis / tRNA aminoacylation, Trp / Tryptophanyl-tRNA synthetase (EC 6.1.1.2)	Tryptophan--tRNA ligase (EC 6.1.1.2) (Tryptophanyl-tRNA synthetase) (TrpRS)	tryptophanyl-tRNA aminoacylation [GO:0006436]	K01867;	-0.03	0.05	0.03	0.07	0.03	-0.11	0.28	0.35	0.367556	0.598531	0.0453698	0.999334	0.405247	0.963673	0.910615
SAOUHSC_00934	6	spxA	NA	Q2G1U6	Regulatory protein Spx	Regulatory protein Spx	negative regulation of transcription, DNA-templated [GO:0045892]; transcription, DNA-templated [GO:0006351]	K16509;	0.01	-0.3	2.55	2.29	-0.01	0.4	2.88	2.69	0.196949	6.05e-05	7.33e-07	0.999334	0.112953	0.527441	0.451965
SAOUHSC_00935	4	trfA	NA	Q2G1U5	DNA Metabolism / DNA uptake, competence / Gram Positive Competence / Negative regulator of genetic competence MecA	Adapter protein MecA		K16511;	0.03	-0.34	-1.16	-1.68	-0.03	-0.38	-1.7	-1.42	0.562697	0.00257089	4.07e-06	0.999334	0.99928	0.53066	0.986013
SAOUHSC_00937	19	pepF	NA	Q2G1U3	Oligoendopeptidase F	Oligoendopeptidase F (EC 3.4.24.-)	signal peptide processing [GO:0006465]	K08602;	-0.04	-0.2	-0.21	0.49	0.04	0.08	-0.02	0.64	0.469005	0.00688534	0.000147786	0.999334	0.33811	0.908207	0.889158
SAOUHSC_00940	4	-	NA	Q2G201	Regulation and Cell signaling / Regulation and Cell signaling - no subcategory / cAMP signaling in bacteria / Adenylate cyclase (EC 4.6.1.1); CBSS-222523.1.peg.1311 / Adenylate cyclase (EC 4.6.1.1)	Uncharacterized protein			0.05	-0.06	0.16	0.31	-0.05	0.06	0.01	0.47	0.234302	0.0626633	0.00525432	0.999334	0.285748	0.894727	0.704229
SAOUHSC_00942	6	relQ	NA	Q2G204	CBSS-222523.1.peg.1311 / GTP pyrophosphokinase (EC 2.7.6.5)	GTP pyrophosphokinase, putative	guanosine tetraphosphate metabolic process [GO:0015969]; response to starvation [GO:0042594]	K07816;	-0.13	-0.08	0.32	0.73	0.13	-0.03	0.61	0.73	0.42305	0.00516331	0.00364132	0.50796	0.614206	0.895213	0.401993
SAOUHSC_00943	3	ppnK	NA	Q2G1Z9	Cofactors, Vitamins, Prosthetic Groups, Pigments / NAD and NADP / NAD and NADP cofactor biosynthesis global / NAD kinase (EC 2.7.1.23); CBSS-222523.1.peg.1311 / NAD kinase (EC 2.7.1.23)	NAD kinase (EC 2.7.1.23) (ATP-dependent NAD kinase)	NAD metabolic process [GO:0019674]; NADP biosynthetic process [GO:0006741]	K00858;	-0.04	0.06	0.27	0.6	0.04	0.22	-0.05	0.59	0.838309	0.146091	0.875698	0.999334	0.987422	0.768755	0.845515
SAOUHSC_00945	2	mgtE	NA	Q2FZQ5	Mg/Co/Ni transporter MgtE / CBS domain	Magnesium transporter MgtE		K06213;	-0.36	-0.36	-0.59	1.33	0.36	-0.62	0.23	0.11	0.0393825	0.0109478	0.0283046	0.520751	0.460572	0.993574	0.0860972
SAOUHSC_00947	8	fabI	NA	Q2FZQ3	Fatty Acids, Lipids, and Isoprenoids / Fatty acids / Fatty Acid Biosynthesis FASII / Enoyl-[acyl-carrier-protein] reductase [NADH] (EC 1.3.1.9)	Enoyl-[acyl-carrier-protein] reductase [NADPH] FabI (ENR) (EC 1.3.1.39) (NADPH-dependent enoyl-ACP reductase)	fatty acid elongation [GO:0030497]; protein homotetramerization [GO:0051289]	K00208;	0.06	0.19	0.08	0.37	-0.06	0.08	-0.01	0.22	0.987828	0.123079	0.0199807	0.999334	0.938878	0.954118	0.947117
SAOUHSC_00948	2	-	NA	Q2FZQ2	UPF0118 membrane protein SAV1012	Uncharacterized protein	transmembrane transport [GO:0055085]		0.01	0.19	0.33	-0.81	-0.01	-0.26	-1.07	-0.55	0.101523	0.0259343	0.10139	0.999334	0.59298	0.168312	0.889158
SAOUHSC_00951	7	-	NA	Q2FZP9	RNA Metabolism / RNA processing and modification / RNA processing orphans / 2H phosphoesterase superfamily protein Bsu1186 (yjcG)	Putative phosphoesterase SAOUHSC_00951 (EC 3.1.-.-)			0.01	-0.49	1.22	0.97	-0.01	0.27	1.45	1.3	0.11231	0.000502905	5.36e-06	0.999334	0.0511766	0.603123	0.657427
SAOUHSC_00954	8	murE	NA	Q2FZP6	Cell Wall and Capsule / Cell Wall and Capsule - no subcategory / Peptidoglycan biosynthesis--gjo / UDP-N-acetylmuramoylalanyl-D-glutamate--L-lysine ligase (EC 6.3.2.7)	UDP-N-acetylmuramoyl-L-alanyl-D-glutamate--L-lysine ligase (EC 6.3.2.7) (L-lysine-adding enzyme) (UDP-MurNAc-L-Ala-D-Glu:L-Lys ligase) (UDP-MurNAc-tripeptide synthetase) (UDP-N-acetylmuramyl-tripeptide synthetase)	cell cycle [GO:0007049]; cell division [GO:0051301]; cell wall organization [GO:0071555]; peptidoglycan biosynthetic process [GO:0009252]; regulation of cell shape [GO:0008360]	K05362;	-0.02	0.09	0.19	0.05	0.02	0.02	-0.5	-0.01	0.0511065	0.8683	0.0106154	0.999334	0.938878	0.0664855	0.978326
SAOUHSC_00956	14	prfC	NA	Q2FZP4	Protein Metabolism / Protein biosynthesis / Translation termination factors bacterial / Peptide chain release factor 3	Peptide chain release factor 3 (RF-3)	translational termination [GO:0006415]	K02837;	-0.08	0.09	0.01	-0.08	0.08	0.04	-0.17	-0.24	0.463311	0.78152	0.080602	0.999334	0.989044	0.429988	0.666607
SAOUHSC_00958	12	htrA2	NA	Q2FZP2	Serine protease, DegP/HtrA, do-like (EC 3.4.21.-)	Serine protease HtrA-like (EC 3.4.21.-)			-0.02	0.04	-0.04	-0.07	0.02	0.07	-0.49	-0.03	0.315024	0.765676	0.0106668	0.999334	0.990641	0.329816	0.924306
SAOUHSC_00960	2	-	NA	Q2FZP0	Nucleosides and Nucleotides / Purines / Purine conversions / 2',3'-cyclic-nucleotide 2'-phosphodiesterase (EC 3.1.4.16); Nucleosides and Nucleotides / Pyrimidines / pyrimidine conversions / 2',3'-cyclic-nucleotide 2'-phosphodiesterase (EC 3.1.4.16); Potassium metabolism / Potassium metabolism - no subcategory / Glutathione-regulated potassium-efflux system and associated functions / 2',3'-cyclic-…	Uncharacterized protein	nucleotide catabolic process [GO:0009166]		-0.03	-0.5	-0.04	0.12	0.03	0.27	-0.8	-1.54	0.456339	0.0707013	0.206528	0.999334	0.834203	0.886994	0.657427
SAOUHSC_00963	4	lplA1	NA	Q2FZN7	Amino Acids and Derivatives / Alanine, serine, and glycine / Glycine cleavage system / Lipoate-protein ligase A; Carbohydrates / Central carbohydrate metabolism / Dehydrogenase complexes / Lipoate-protein ligase A; Cofactors, Vitamins, Prosthetic Groups, Pigments / Lipoic acid / Lipoic acid metabolism / Lipoate-protein ligase A	Lipoate--protein ligase (EC 6.3.1.20)	protein lipoylation [GO:0009249]	K03800;	-0.65	0.31	0.43	1.16	0.65	-0.68	-0.51	1.23	0.0705621	0.0354238	0.00479607	0.999334	0.0430417	0.115572	0.570848
SAOUHSC_00964	2	-	NA	Q2FZN6	FIG01108367: hypothetical protein	Uncharacterized protein			0.03	-0.02	-0.45	-1.2	-0.03	-0.08	-0.07	-0.75	0.203711	0.00447174	0.00336143	0.999334	0.591015	0.887367	0.495365
SAOUHSC_00972	3	-	NA	Q2FZM8	FIG01108706: hypothetical protein	Uncharacterized protein			0.01	-0.55	-0.59	-1.51	-0.01	-0.13	-0.48	-1.68	0.523407	0.00336055	2.59e-06	0.999334	0.538367	0.935553	0.931932
SAOUHSC_00973	8	tarM	NA	Q2FZM7	Cell Wall and Capsule / Gram-Positive cell wall components / Teichoic and lipoteichoic acids biosynthesis / Poly(glycerol-phosphate) alpha-glucosyltransferase (EC 2.4.1.52)	Uncharacterized protein			0.04	-0.3	-0.14	-1.23	-0.04	0.04	-0.39	-0.95	0.361714	0.000417274	6.14e-05	0.999334	0.374768	0.945875	0.760459
SAOUHSC_00980	3	menA	NA	Q2FZM0	Cofactors, Vitamins, Prosthetic Groups, Pigments / Quinone cofactors / Menaquinone and Phylloquinone Biosynthesis / 1,4-dihydroxy-2-naphthoate polyprenyltransferase (EC 2.5.1.74); Cofactors, Vitamins, Prosthetic Groups, Pigments / Quinone cofactors / Menaquinone biosynthesis from chorismate via 1,4-dihydroxy-2-naphthoate / 1,4-dihydroxy-2-naphthoate polyprenyltransferase (EC 2.5.1.74)	1,4-dihydroxy-2-naphthoate octaprenyltransferase (DHNA-octaprenyltransferase) (EC 2.5.1.74)	menaquinone biosynthetic process [GO:0009234]; ubiquinone biosynthetic process via 3,4-dihydroxy-5-polyprenylbenzoate [GO:0032194]; vitamin K biosynthetic process [GO:0042371]	K02548;	-0.11	0.32	0.11	0.03	0.11	-0.07	-0.29	-0.11	0.486903	0.314622	0.271234	0.999334	0.448952	0.53066	0.457853
SAOUHSC_00982	3	menF	NA	Q2FZL8	Cofactors, Vitamins, Prosthetic Groups, Pigments / Quinone cofactors / Menaquinone and Phylloquinone Biosynthesis / Menaquinone-specific isochorismate synthase (EC 5.4.4.2); Cofactors, Vitamins, Prosthetic Groups, Pigments / Quinone cofactors / Menaquinone biosynthesis from chorismate via 1,4-dihydroxy-2-naphthoate / Menaquinone-specific isochorismate synthase (EC 5.4.4.2); Menaquinone and Phyllo…	Uncharacterized protein	biosynthetic process [GO:0009058]	K02552;	0.13	-0.5	0.1	-0.92	-0.13	0.23	-0.59	-1.34	0.11231	0.011006	0.00408287	0.999334	0.305933	0.502852	0.936441
SAOUHSC_00983	2	menD	NA	Q2FZL7	Cofactors, Vitamins, Prosthetic Groups, Pigments / Quinone cofactors / Menaquinone and Phylloquinone Biosynthesis / 2-succinyl-5-enolpyruvyl-6-hydroxy-3-cyclohexene-1-carboxylic-acid synthase (EC 2.2.1.9); Cofactors, Vitamins, Prosthetic Groups, Pigments / Quinone cofactors / Menaquinone biosynthesis from chorismate via 1,4-dihydroxy-2-naphthoate / 2-succinyl-5-enolpyruvyl-6-hydroxy-3-cyclohexene…	2-succinyl-5-enolpyruvyl-6-hydroxy-3-cyclohexene-1-carboxylate synthase (SEPHCHC synthase) (EC 2.2.1.9) (Menaquinone biosynthesis protein MenD)	menaquinone biosynthetic process [GO:0009234]	K02551;	0.14	0.09	-0.13	-1.14	-0.14	0.19	-0.51	-1.52	0.792789	0.40649	0.00419587	0.999334	0.854787	0.966611	0.910615
SAOUHSC_00985	13	menB	NA	Q2FZL5	Cofactors, Vitamins, Prosthetic Groups, Pigments / Quinone cofactors / Menaquinone and Phylloquinone Biosynthesis / Naphthoate synthase (EC 4.1.3.36); Cofactors, Vitamins, Prosthetic Groups, Pigments / Quinone cofactors / Menaquinone biosynthesis from chorismate via 1,4-dihydroxy-2-naphthoate / Naphthoate synthase (EC 4.1.3.36)	1,4-dihydroxy-2-naphthoyl-CoA synthase (DHNA-CoA synthase) (EC 4.1.3.36)	menaquinone biosynthetic process [GO:0009234]	K01661;	-0.03	-0.09	-0.1	0.09	0.03	0	0.11	-0.05	0.127948	0.171048	0.59678	0.999334	0.990596	0.552234	0.385622
SAOUHSC_00989	5	-	CodY	Q2FZL1	Amino Acids and Derivatives / Lysine, threonine, methionine, and cysteine / Lysine Biosynthesis DAP Pathway / N-acetyl-L,L-diaminopimelate aminotransferase (EC 2.6.1.-)	Aminotransferase (EC 2.6.1.-)	biosynthetic process [GO:0009058]	K00841;	0.07	0.01	0.6	0.88	-0.07	-0.26	0.86	0.71	0.569823	0.00687491	0.000560497	0.999334	0.99928	0.497548	0.903706
SAOUHSC_00994	40	atl	SigB	Q2FZK7	Adhesins in Staphylococcus / Bifunctional autolysin Atl / N-acetylmuramoyl-L-alanine amidase (EC 3.5.1.28) / Endo-beta-N-acetylglucosaminidase (EC 3.2.1.96); Biofilm formation in Staphylococcus / Bifunctional autolysin Atl / N-acetylmuramoyl-L-alanine amidase (EC 3.5.1.28) / Endo-beta-N-acetylglucosaminidase (EC 3.2.1.96); Cell envelope-associated LytR-CpsA-Psr transcriptional attenuators / Bifun…	Bifunctional autolysin [Includes: N-acetylmuramoyl-L-alanine amidase (EC 3.5.1.28); Mannosyl-glycoprotein endo-beta-N-acetylglucosaminidase (EC 3.2.1.96)]	cell wall organization [GO:0071555]; peptidoglycan catabolic process [GO:0009253]	K13714;	-0.07	-0.26	-2.85	-2.94	0.07	0.07	-2.43	-2.66	0.559604	1.05e-06	2.34e-07	0.999334	0.503646	0.847954	0.599782
SAOUHSC_00997	7	-	NA	P52078	Regulation and Cell signaling / Regulation and Cell signaling - no subcategory / Cell envelope-associated LytR-CpsA-Psr transcriptional attenuators / Cell envelope-associated transcriptional attenuator LytR-CpsA-Psr, subfamily F2 (as in PMID19099556)	Uncharacterized protein SAOUHSC_00997 (ORF1)			0.02	0	-0.01	0.84	-0.02	0.04	-0.15	0.5	0.792437	0.0132244	0.00614449	0.999334	0.906253	0.69911	0.801035
SAOUHSC_00998	3	fmtA	VraSR	Q2FZK3	Regulation and Cell signaling / Regulation and Cell signaling - no subcategory / Cell envelope-associated LytR-CpsA-Psr transcriptional attenuators / FmtA protein involved in methicillin resistance	Protein FmtA	cell wall organization [GO:0071555]; response to antibiotic [GO:0046677]	K22580;	-0.14	0.32	-0.4	1.46	0.14	0.41	0	1.3	0.935548	0.0408855	0.00564829	0.999334	0.918214	0.941757	0.981824
SAOUHSC_01001	3	qoxB	NA	Q2FZK0	Terminal cytochrome C oxidases / AA3-600 quinol oxidase subunit I	Probable quinol oxidase subunit 1 (EC 1.10.3.-) (Quinol oxidase polypeptide I)	aerobic respiration [GO:0009060]; electron transport coupled proton transport [GO:0015990]; oxidative phosphorylation [GO:0006119]; respiratory electron transport chain [GO:0022904]	K02827;	-0.31	0.07	-0.29	-0.3	0.31	0.24	-0.31	-0.72	0.275269	0.206875	0.0602884	0.999334	0.677011	0.34372	0.307826
SAOUHSC_01002	11	qoxA	NA	Q2FZJ9	Terminal cytochrome C oxidases / AA3-600 quinol oxidase subunit II	Probable quinol oxidase subunit 2 (EC 1.10.3.-) (Quinol oxidase polypeptide II)	ATP synthesis coupled electron transport [GO:0042773]	K02826;	-0.41	-0.41	-0.39	-0.04	0.41	-0.04	-0.5	-0.13	0.244255	0.196765	0.0362131	0.556076	0.819131	0.229553	0.415302
SAOUHSC_01007	16	folD	NA	Q2FZJ6	Folate Biosynthesis / Methylenetetrahydrofolate dehydrogenase (NADP+) (EC 1.5.1.5) / Methenyltetrahydrofolate cyclohydrolase (EC 3.5.4.9); One-carbon metabolism by tetrahydropterines / Methylenetetrahydrofolate dehydrogenase (NADP+) (EC 1.5.1.5) / Methenyltetrahydrofolate cyclohydrolase (EC 3.5.4.9); Serine-glyoxylate cycle / Methylenetetrahydrofolate dehydrogenase (NADP+) (EC 1.5.1.5) / Methenyl…	Bifunctional protein FolD [Includes: Methylenetetrahydrofolate dehydrogenase (EC 1.5.1.5); Methenyltetrahydrofolate cyclohydrolase (EC 3.5.4.9)]	histidine biosynthetic process [GO:0000105]; methionine biosynthetic process [GO:0009086]; one-carbon metabolic process [GO:0006730]; purine nucleotide biosynthetic process [GO:0006164]; tetrahydrofolate interconversion [GO:0035999]	K01491;	-0.02	-0.63	-0.37	0.05	0.02	-0.26	-0.26	-0.08	0.144733	0.0106082	0.0252163	0.999334	0.33811	0.945875	0.640259
SAOUHSC_01008	4	purE	NA	Q2FZJ5	De Novo Purine Biosynthesis / N5-carboxyaminoimidazole ribonucleotide mutase (EC 5.4.99.18)	N5-carboxyaminoimidazole ribonucleotide mutase (N5-CAIR mutase) (EC 5.4.99.18) (5-(carboxyamino)imidazole ribonucleotide mutase)	'de novo' IMP biosynthetic process [GO:0006189]	K01588;	-0.12	-0.77	-0.43	0.29	0.12	-0.39	-1.15	0.02	0.0513405	0.0234514	0.00627756	0.999334	0.810822	0.115572	0.433651
SAOUHSC_01009	12	purK	NA	Q2FZJ4	Nucleosides and Nucleotides / Purines / De Novo Purine Biosynthesis / Phosphoribosylaminoimidazole carboxylase ATPase subunit (EC 4.1.1.21)	N5-carboxyaminoimidazole ribonucleotide synthase (N5-CAIR synthase) (EC 6.3.4.18) (5-(carboxyamino)imidazole ribonucleotide synthetase)	'de novo' IMP biosynthetic process [GO:0006189]; oxidation-reduction process [GO:0055114]	K01589;	0	-0.49	-0.73	-0.74	0	-0.21	-0.6	-0.76	0.602035	0.0106124	0.00139781	0.999334	0.601675	0.971036	0.977138
SAOUHSC_01010	11	purC	NA	Q2FZJ3	Nucleosides and Nucleotides / Purines / De Novo Purine Biosynthesis / Phosphoribosylaminoimidazole-succinocarboxamide synthase (EC 6.3.2.6)	Phosphoribosylaminoimidazole-succinocarboxamide synthase (EC 6.3.2.6) (SAICAR synthetase)	'de novo' IMP biosynthetic process [GO:0006189]; cobalamin biosynthetic process [GO:0009236]	K01923;	0.02	-0.63	-0.94	-0.67	-0.02	-0.26	-0.82	-0.87	0.275938	0.00389764	0.000182145	0.999334	0.394472	0.810006	0.845515
SAOUHSC_01011	6	purS	NA	Q2FZJ2	Nucleosides and Nucleotides / Purines / De Novo Purine Biosynthesis / Phosphoribosylformylglycinamidine synthase, PurS subunit (EC 6.3.5.3)	Phosphoribosylformylglycinamidine synthase subunit PurS (FGAM synthase) (EC 6.3.5.3) (Formylglycinamide ribonucleotide amidotransferase subunit III) (FGAR amidotransferase III) (FGAR-AT III) (Phosphoribosylformylglycinamidine synthase subunit III)	'de novo' IMP biosynthetic process [GO:0006189]		-0.04	-0.65	-0.98	-0.9	0.04	-0.49	-0.93	-0.97	0.921887	0.00468289	0.00266138	0.999334	0.967533	0.929079	0.931932
SAOUHSC_01012	8	purQ	NA	Q2FZJ1	Nucleosides and Nucleotides / Purines / De Novo Purine Biosynthesis / Phosphoribosylformylglycinamidine synthase, glutamine amidotransferase subunit (EC 6.3.5.3)	Phosphoribosylformylglycinamidine synthase subunit PurQ (FGAM synthase) (EC 6.3.5.3) (Formylglycinamide ribonucleotide amidotransferase subunit I) (FGAR amidotransferase I) (FGAR-AT I) (Glutaminase PurQ) (EC 3.5.1.2) (Phosphoribosylformylglycinamidine synthase subunit I)	'de novo' IMP biosynthetic process [GO:0006189]; glutamine metabolic process [GO:0006541]	K01952;	-0.01	-0.74	-1.08	-1.1	0.01	-0.43	-0.92	-0.97	0.584039	0.000626405	2.16e-05	0.999334	0.405247	0.796022	0.871723
SAOUHSC_01013	32	purL	NA	Q2FZJ0	Nucleosides and Nucleotides / Purines / De Novo Purine Biosynthesis / Phosphoribosylformylglycinamidine synthase, synthetase subunit (EC 6.3.5.3)	Phosphoribosylformylglycinamidine synthase subunit PurL (FGAM synthase) (EC 6.3.5.3) (Formylglycinamide ribonucleotide amidotransferase subunit II) (FGAR amidotransferase II) (FGAR-AT II) (Glutamine amidotransferase PurL) (Phosphoribosylformylglycinamidine synthase subunit II)	'de novo' IMP biosynthetic process [GO:0006189]	K01952;	0.03	-0.62	-0.7	-0.88	-0.03	-0.29	-0.74	-0.83	0.186063	0.0030547	3.72e-05	0.999334	0.144092	0.989518	0.902562
SAOUHSC_01014	8	purF	NA	Q2FZI9	Nucleosides and Nucleotides / Purines / De Novo Purine Biosynthesis / Amidophosphoribosyltransferase (EC 2.4.2.14); Virulence, Disease and Defense / Bacteriocins, ribosomally synthesized antibacterial peptides / Colicin V and Bacteriocin Production Cluster / Amidophosphoribosyltransferase (EC 2.4.2.14)	Amidophosphoribosyltransferase (ATase) (EC 2.4.2.14) (Glutamine phosphoribosylpyrophosphate amidotransferase) (GPATase)	'de novo' IMP biosynthetic process [GO:0006189]; glutamine metabolic process [GO:0006541]; nucleoside metabolic process [GO:0009116]; purine nucleobase biosynthetic process [GO:0009113]	K00764;	-0.02	-0.73	-0.93	-0.96	0.02	-0.44	-0.85	-0.82	0.495137	0.00175091	2.72e-05	0.999334	0.354048	0.628172	0.902562
SAOUHSC_01015	7	purM	NA	Q2FZI8	Nucleosides and Nucleotides / Purines / De Novo Purine Biosynthesis / Phosphoribosylformylglycinamidine cyclo-ligase (EC 6.3.3.1)	Phosphoribosylformylglycinamidine cyclo-ligase (EC 6.3.3.1) (AIR synthase) (AIRS) (Phosphoribosyl-aminoimidazole synthetase)	'de novo' IMP biosynthetic process [GO:0006189]	K01933;	-0.01	-0.57	-0.89	-1.05	0.01	-0.33	-0.84	-0.82	0.284582	0.000368501	2.4e-05	0.999334	0.477284	0.915363	0.467935
SAOUHSC_01016	3	purN	NA	Q2FZI7	Nucleosides and Nucleotides / Purines / De Novo Purine Biosynthesis / Phosphoribosylglycinamide formyltransferase (EC 2.1.2.2); Potassium metabolism / Potassium metabolism - no subcategory / Glutathione-regulated potassium-efflux system and associated functions / Phosphoribosylglycinamide formyltransferase (EC 2.1.2.2)	Phosphoribosylglycinamide formyltransferase (EC 2.1.2.2) (5'-phosphoribosylglycinamide transformylase) (GAR transformylase) (GART)	'de novo' IMP biosynthetic process [GO:0006189]	K11175;	-0.06	-0.85	-1.09	-0.61	0.06	-0.31	-0.61	-0.41	0.581033	0.0431587	0.0884465	0.999334	0.822543	0.699562	0.979773
SAOUHSC_01017	21	purH	NA	Q2FZI6	De Novo Purine Biosynthesis / IMP cyclohydrolase (EC 3.5.4.10) / Phosphoribosylaminoimidazolecarboxamide formyltransferase (EC 2.1.2.3)	Bifunctional purine biosynthesis protein PurH [Includes: Phosphoribosylaminoimidazolecarboxamide formyltransferase (EC 2.1.2.3) (AICAR transformylase); IMP cyclohydrolase (EC 3.5.4.10) (ATIC) (IMP synthase) (Inosinicase)]	'de novo' IMP biosynthetic process [GO:0006189]	K00602;	-0.04	-0.67	-0.88	-0.96	0.04	-0.37	-0.67	-0.92	0.602035	0.000936901	3.95e-06	0.999334	0.594823	0.996338	0.967193
SAOUHSC_01018	14	purD	NA	Q2FZI5	Miscellaneous / Miscellaneous - no subcategory / EC 6.3.4.- Ligases that form carbon-nitrogen bonds / Phosphoribosylamine--glycine ligase (EC 6.3.4.13); Nucleosides and Nucleotides / Purines / De Novo Purine Biosynthesis / Phosphoribosylamine--glycine ligase (EC 6.3.4.13)	Phosphoribosylamine--glycine ligase (EC 6.3.4.13) (GARS) (Glycinamide ribonucleotide synthetase) (Phosphoribosylglycinamide synthetase)	'de novo' IMP biosynthetic process [GO:0006189]; purine nucleobase biosynthetic process [GO:0009113]	K01945;	-0.05	-0.78	-1.03	-1.11	0.05	-0.41	-0.75	-1.14	0.520943	0.000119033	5.77e-05	0.999334	0.47257	0.895213	0.978326
SAOUHSC_01024	2	-	SigB	Q2FZI0	FIG01108289: hypothetical protein	Uncharacterized protein			-0.06	-1.08	-1.11	-3.71	0.06	-0.82	-0.2	-2.46	0.266941	0.00210706	0.000120673	0.999334	0.855431	0.597208	0.286373
SAOUHSC_01025	3	-	SigB	Q2FZH9	FIG01107839: hypothetical protein	Uncharacterized protein			-0.39	0.53	0.53	0.71	0.39	1.01	0.08	-0.1	0.214892	0.19783	0.0448836	0.999334	0.990596	0.452072	0.332107
SAOUHSC_01026	7	-	NA	Q2FZH8	Protein Metabolism / Protein biosynthesis / Ribosome biogenesis bacterial / LSU m5C1962 methyltransferase RlmI	Uncharacterized protein	rRNA processing [GO:0006364]	K06969;	-0.06	0.26	0.42	0.37	0.06	0.29	0.08	-0.24	0.284846	0.192257	0.0398503	0.999334	0.990596	0.40959	0.406621
SAOUHSC_01027	8	-	SigB	Q2FZH7	FIG01108691: hypothetical protein	Uncharacterized protein			0.04	-1.11	-0.21	-1.26	-0.04	-0.6	0.57	-0.81	0.186063	0.00694242	5.65e-06	0.999334	0.17557	0.168312	0.391942
SAOUHSC_01028	7	ptsH	SigB	Q2FZH6	Carbohydrates / Monosaccharides / Fructose utilization / Phosphocarrier protein of PTS system; Carbohydrates / Sugar alcohols / Mannitol Utilization / Phosphocarrier protein of PTS system; Regulation and Cell signaling / Regulation and Cell signaling - no subcategory / HPr catabolite repression system / Phosphocarrier protein of PTS system	Phosphocarrier protein hpr, putative	phosphoenolpyruvate-dependent sugar phosphotransferase system [GO:0009401]	K11189;	0	0.05	-0.04	-0.26	0	0.14	0.29	-0.01	0.344032	0.183441	0.285075	0.999334	0.990596	0.413813	0.457853
SAOUHSC_01029	26	ptsI	SigB	Q2FZH5	Carbohydrates / Monosaccharides / Fructose utilization / Phosphoenolpyruvate-protein phosphotransferase of PTS system (EC 2.7.3.9); Carbohydrates / Sugar alcohols / Mannitol Utilization / Phosphoenolpyruvate-protein phosphotransferase of PTS system (EC 2.7.3.9)	Phosphoenolpyruvate-protein phosphotransferase (EC 2.7.3.9) (Phosphotransferase system, enzyme I)	phosphoenolpyruvate-dependent sugar phosphotransferase system [GO:0009401]	K08483;	0.02	0.05	-0.09	0.23	-0.02	-0.08	-0.01	0.24	0.507846	0.234835	0.0128115	0.999334	0.657698	0.836747	0.903706
SAOUHSC_01031	3	cydA	x	Q2FZH3	Respiration / Electron accepting reactions / Terminal cytochrome d ubiquinol oxidases / Cytochrome d ubiquinol oxidase subunit I (EC 1.10.3.-); Respiration / Electron accepting reactions / Terminal cytochrome oxidases / Cytochrome d ubiquinol oxidase subunit I (EC 1.10.3.-)	Cytochrome d ubiquinol oxidase, subunit I, putative	aerobic electron transport chain [GO:0019646]	K00425;	-0.44	0.3	0.52	1.44	0.44	0.22	-0.16	1.2	0.154762	0.00834742	0.0277294	0.999334	0.405247	0.107818	0.477205
SAOUHSC_01034	4	ktrA	SigB	Q2FZH1	Bacterial RNA-metabolizing Zn-dependent hydrolases / KtrCD potassium uptake system, peripheral membrane component KtrC; Conserved gene cluster associated with Met-tRNA formyltransferase / KtrCD potassium uptake system, peripheral membrane component KtrC; Glutathione-regulated potassium-efflux system and associated functions / KtrCD potassium uptake system, peripheral membrane component KtrC; Hype…	Uncharacterized protein	potassium ion transport [GO:0006813]	K03499;	-0.17	-0.13	0.06	0.62	0.17	0.03	0.13	0.53	0.354209	0.0132244	0.206905	0.999334	0.887014	0.467931	0.381218
SAOUHSC_01035	17	rnjA	NA	Q2FZG9	Bacterial RNA-metabolizing Zn-dependent hydrolases / Ribonuclease J1 (endonuclease and 5' exonuclease)	Ribonuclease J 1 (RNase J1) (EC 3.1.-.-)	mRNA processing [GO:0006397]; rRNA processing [GO:0006364]	K12574;	-0.05	-0.17	-0.18	0	0.05	-0.08	-0.23	-0.03	0.641358	0.0913287	0.20802	0.999334	0.990596	0.820551	0.71512
SAOUHSC_01036	5	rpoY	NA	Q2FZG8	Bacterial RNA-metabolizing Zn-dependent hydrolases / Protein of unknown function DUF1447; Conserved gene cluster associated with Met-tRNA formyltransferase / Protein of unknown function DUF1447	UPF0356 protein SAOUHSC_01036			0.05	-0.7	-0.23	-0.1	-0.05	-0.41	0.03	-0.16	0.289846	0.11934	0.0409475	0.999334	0.30777	0.773003	0.96176
SAOUHSC_01038	6	def	NA	Q2FZG6	Carbohydrates / Central carbohydrate metabolism / Dehydrogenase complexes / Peptide deformylase (EC 3.5.1.88); Protein Metabolism / Protein biosynthesis / Translation termination factors bacterial / Peptide deformylase (EC 3.5.1.88); Bacterial RNA-metabolizing Zn-dependent hydrolases / Peptide deformylase (EC 3.5.1.88); Conserved gene cluster associated with Met-tRNA formyltransferase / Peptide d…	Peptide deformylase (PDF) (EC 3.5.1.88) (Polypeptide deformylase)	co-translational protein modification [GO:0043686]; N-terminal protein amino acid modification [GO:0031365]; peptidyl-methionine modification [GO:0018206]; translation [GO:0006412]	K01462;	0	-0.2	-0.02	0.15	0	0.05	-0.52	-0.09	0.66845	0.31844	0.447524	0.999334	0.821111	0.886994	0.890313
SAOUHSC_01039	9	-	NA	Q2FZG5	FIG01108153: hypothetical protein	Uncharacterized protein			0.07	0.03	-0.25	0.64	-0.07	-0.05	-0.26	0.48	0.955879	0.00254204	0.0015911	0.999334	0.990596	0.992154	0.930908
SAOUHSC_01040	16	pdhA	NA	Q2FZG4	Carbohydrates / Central carbohydrate metabolism / Dehydrogenase complexes / Pyruvate dehydrogenase E1 component alpha subunit (EC 1.2.4.1); Carbohydrates / Central carbohydrate metabolism / Pyruvate metabolism II: acetyl-CoA, acetogenesis from pyruvate / Pyruvate dehydrogenase E1 component alpha subunit (EC 1.2.4.1)	Pyruvate dehydrogenase complex, E1 component, alpha subunit, putative (EC 1.2.4.1)		K00161;	-0.02	0.17	0.06	0.26	0.02	-0.04	0.03	0.18	0.563511	0.553639	0.028898	0.999334	0.405247	0.816579	0.92664
SAOUHSC_01041	17	pdhB	NA	Q2G2A5	Carbohydrates / Central carbohydrate metabolism / Dehydrogenase complexes / Pyruvate dehydrogenase E1 component beta subunit (EC 1.2.4.1); Carbohydrates / Central carbohydrate metabolism / Pyruvate metabolism II: acetyl-CoA, acetogenesis from pyruvate / Pyruvate dehydrogenase E1 component beta subunit (EC 1.2.4.1)	Pyruvate dehydrogenase complex, E1 component, pyruvate dehydrogenase beta subunit, putative (EC 1.2.4.1)		K00162;	0.04	0.08	0.1	0.12	-0.04	0.04	0.08	0.11	0.892833	0.62789	0.537506	0.999334	0.990596	0.836747	0.970543
SAOUHSC_01042	20	pdhC	NA	Q2G2A4	Carbohydrates / Central carbohydrate metabolism / Dehydrogenase complexes / Dihydrolipoamide acetyltransferase component of pyruvate dehydrogenase complex (EC 2.3.1.12); Carbohydrates / Central carbohydrate metabolism / Pyruvate metabolism II: acetyl-CoA, acetogenesis from pyruvate / Dihydrolipoamide acetyltransferase component of pyruvate dehydrogenase complex (EC 2.3.1.12); Cofactors, Vitamins,…	Dihydrolipoamide acetyltransferase component of pyruvate dehydrogenase complex (EC 2.3.1.-)	metabolic process [GO:0008152]	K00627;	-0.02	0.11	0.07	-0.03	0.02	0.05	-0.13	0.01	0.203711	0.304687	0.0790235	0.999334	0.692478	0.177062	0.938848
SAOUHSC_01043	17	pdhD	NA	Q2G2A3	Carbohydrates / Central carbohydrate metabolism / Dehydrogenase complexes / Dihydrolipoamide dehydrogenase of pyruvate dehydrogenase complex (EC 1.8.1.4); Carbohydrates / Central carbohydrate metabolism / Pyruvate metabolism II: acetyl-CoA, acetogenesis from pyruvate / Dihydrolipoamide dehydrogenase of pyruvate dehydrogenase complex (EC 1.8.1.4); Carbohydrates / Central carbohydrate metabolism / …	Dihydrolipoyl dehydrogenase (EC 1.8.1.4)	cell redox homeostasis [GO:0045454]	K00382;	-0.07	0.05	0.01	0.33	0.07	0.29	0.08	-0.1	0.0361891	0.259034	0.0295864	0.999334	0.531587	0.967866	0.198189
SAOUHSC_01044	2	-	NA	Q2G2A2	UPF0223 protein YktA	UPF0223 protein SAOUHSC_01044			-0.1	0.16	0.03	-0.64	0.1	0.06	-0.31	-1.45	0.094638	0.0670037	7.07e-07	0.999334	0.65405	0.505453	0.11082
SAOUHSC_01046	6	potA	NA	Q2G2A7	Polyamine Metabolism / Spermidine/putrescine import ABC transporter ATP-binding protein PotA (TC 3.A.1.11.1)	Spermidine/putrescine import ATP-binding protein PotA (EC 3.6.3.31)		K11072;	-0.01	0.68	0.22	-0.78	0.01	-0.06	-0.63	-2.07	0.0361545	0.014722	5.36e-06	0.999334	0.157506	0.421357	0.0253966
SAOUHSC_01049	10	potD	NA	Q2G2A8	Amino Acids and Derivatives / Arginine; urea cycle, polyamines / Polyamine Metabolism / ABC transporter, periplasmic spermidine putrescine-binding protein PotD (TC 3.A.1.11.1)	Spermidine/putrescine ABC transporter, spermidine/putrescine-binding protein, putative	polyamine transport [GO:0015846]	K11069;	0.02	0.6	0.28	-0.53	-0.02	-0.13	0.04	-1.4	0.00375438	0.00336055	1.19e-06	0.999334	0.023359	0.946462	0.0118848
SAOUHSC_01050	10	-	SigB	Q2G2G6	FIG01108899: hypothetical protein	Uncharacterized protein			0.04	-0.02	-0.15	-0.16	-0.04	-0.19	-0.99	-0.95	0.266941	0.419986	0.00253359	0.999334	0.990596	0.386443	0.409268
SAOUHSC_01054	6	-	NA	Q2G2G7	FIG01108286: hypothetical protein	UPF0637 protein SAOUHSC_01054			0.09	-0.09	-0.07	0.77	-0.09	0.02	0.07	0.62	0.277459	0.00773314	0.00165968	0.999334	0.324296	0.229553	0.652469
SAOUHSC_01055	3	-	NA	Q2G2G4	Stress Response / Stress Response - no subcategory / Flavohaemoglobin / Inositol-1-monophosphatase (EC 3.1.3.25)	Inositol monophosphatase family protein, putative	inositol metabolic process [GO:0006020]; inositol phosphate dephosphorylation [GO:0046855]; phosphatidylinositol phosphorylation [GO:0046854]; signal transduction [GO:0007165]	K01092;	-0.84	1.09	1.22	1.21	0.84	1.21	1.4	1.52	0.23978	0.0747529	0.0788479	0.0851405	0.202478	0.40959	0.307209
SAOUHSC_01058	20	typA	NA	Q2G1Y6	Protein Metabolism / Protein biosynthesis / Universal GTPases / GTP-binding protein TypA/BipA	GTP-binding protein TypA, putative		K06207;	-0.01	0.5	0.4	-0.36	0.01	0.34	0.08	-0.52	0.809389	0.00390203	0.000260964	0.999334	0.710775	0.699562	0.890796
SAOUHSC_01061	4	-	NA	Q2G1Y7	FIG01108239: hypothetical protein	Uncharacterized protein			-0.07	0.01	-0.06	0.82	0.07	-0.1	0.59	0.82	0.11231	0.00468266	0.00162682	0.999334	0.734941	0.256744	0.903706
SAOUHSC_01062	2	-	NA	Q2G2C3	UPF0358 protein YlaN	UPF0358 protein SAOUHSC_01062			-0.04	2.92	3.05	2.48	0.04	3.35	3.5	1.15	0.138084	0.00150971	3.76e-06	0.999334	0.591015	0.712464	0.449244
SAOUHSC_01064	41	pycA	CodY	Q2G2C1	Carbohydrates / Central carbohydrate metabolism / Pyruvate metabolism I: anaplerotic reactions, PEP / Pyruvate carboxylase (EC 6.4.1.1)	Pyruvate carboxylase (EC 6.4.1.1)	gluconeogenesis [GO:0006094]; pyruvate metabolic process [GO:0006090]	K01958;	-0.04	0	0.01	0.77	0.04	0.32	0.07	0.73	0.148594	0.000386981	0.000190193	0.999334	0.369273	0.836747	0.664508
SAOUHSC_01069	3	-	NA	Q2FZG1	Allergen V5/Tpx-1 related	Uncharacterized protein			0.06	-0.17	-0.48	0.11	-0.06	-0.03	-0.8	0.39	0.579808	0.26091	0.119897	0.999334	0.957619	0.610959	0.978326
SAOUHSC_01071	5	-	NA	Q2FZF9	Carbohydrates / Sugar alcohols / Glycerol and Glycerol-3-phosphate Uptake and Utilization / Glycerophosphoryl diester phosphodiesterase (EC 3.1.4.46)	Glycerophosphoryl diester phosphodiesterase, putative (EC 3.1.4.46)	lipid metabolic process [GO:0006629]	K01126;	-0.39	-0.07	-0.14	0.73	0.39	0.1	-0.65	0.55	0.271517	0.18094	0.0291889	0.999334	0.819131	0.281801	0.388653
SAOUHSC_01074	3	rsmD	NA	Q2FZF6	CBSS-269801.1.peg.1715 / 16S rRNA (guanine(966)-N(2))-methyltransferase (EC 2.1.1.171)	Uncharacterized protein	rRNA methylation [GO:0031167]		0.06	0.24	0.26	0.01	-0.06	0.15	0.35	-0.06	0.830115	0.304687	0.123067	0.999334	0.840656	0.958842	0.896684
SAOUHSC_01075	4	coaD	NA	Q2FZF5	Cofactors, Vitamins, Prosthetic Groups, Pigments / Coenzyme A / Coenzyme A Biosynthesis / Phosphopantetheine adenylyltransferase (EC 2.7.7.3); CBSS-269801.1.peg.1715 / Phosphopantetheine adenylyltransferase (EC 2.7.7.3)	Phosphopantetheine adenylyltransferase (EC 2.7.7.3) (Dephospho-CoA pyrophosphorylase) (Pantetheine-phosphate adenylyltransferase) (PPAT)	coenzyme A biosynthetic process [GO:0015937]	K00954;	-0.02	-0.31	0.48	0.25	0.02	0.02	-0.09	0.23	0.186063	0.0179256	0.750457	0.999334	0.545285	0.429988	0.992907
SAOUHSC_01079	2	isdB	Fur , Agr/rot	Q2FZF0	Iron acquisition and metabolism / Iron acquisition and metabolism - no subcategory / Heme, hemin uptake and utilization systems in GramPositives / Cell surface receptor IsdB for hemoglobin and hemoglobin-haptoglobin complexes	Iron-regulated surface determinant protein B (Fur-regulated protein B) (Staphylococcal iron-regulated protein H) (Staphylococcus aureus surface protein J)	pathogenesis [GO:0009405]		-0.89	6.43	-0.42	4.82	0.89	7.56	3.67	5.58	0.666645	0.00584097	5.22e-05	0.999334	0.892232	0.842597	0.8542
SAOUHSC_01081	3	isdA	Fur , Agr/rot	Q2FZE9	Cell Wall and Capsule / Gram-Positive cell wall components / Sortase / Cell surface protein IsdA, transfers heme from hemoglobin to apo-IsdC; Iron acquisition and metabolism / Iron acquisition and metabolism - no subcategory / Heme, hemin uptake and utilization systems in GramPositives / Cell surface protein IsdA, transfers heme from hemoglobin to apo-IsdC	Iron-regulated surface determinant protein A (Fur-regulated protein A) (Staphylococcal transferrin-binding protein A)		K14193;	-0.08	1.68	-0.08	1.21	0.08	2.39	0.48	0.99	0.704126	0.0095908	0.00489767	0.999334	0.644133	0.971036	0.979773
SAOUHSC_01091	4	-	NA	Q2FZE0	SpoU rRNA Methylase family protein	Uncharacterized protein	RNA processing [GO:0006396]	K03437;	0	-0.08	-0.1	-0.21	0	-0.16	-0.14	-0.02	0.826503	0.64934	0.344683	0.999334	0.990596	0.992154	0.81062
SAOUHSC_01092	9	pheS	NA	Q2FZD9	Protein Metabolism / Protein biosynthesis / tRNA aminoacylation, Phe / Phenylalanyl-tRNA synthetase alpha chain (EC 6.1.1.20)	Phenylalanine--tRNA ligase alpha subunit (EC 6.1.1.20) (Phenylalanyl-tRNA synthetase alpha subunit) (PheRS)	phenylalanyl-tRNA aminoacylation [GO:0006432]	K01889;	-0.01	-0.04	-0.35	-0.51	0.01	-0.23	-0.43	-0.77	0.448459	0.00832472	0.00121084	0.999334	0.477284	0.894727	0.451965
SAOUHSC_01093	24	pheT	NA	Q2FZD8	Protein Metabolism / Protein biosynthesis / tRNA aminoacylation, Phe / Phenylalanyl-tRNA synthetase beta chain (EC 6.1.1.20)	Phenylalanine--tRNA ligase beta subunit (EC 6.1.1.20) (Phenylalanyl-tRNA synthetase beta subunit) (PheRS)	phenylalanyl-tRNA aminoacylation [GO:0006432]	K01890;	0.02	-0.02	-0.24	-0.46	-0.02	-0.11	-0.46	-0.67	0.778358	0.0111747	0.000606585	0.999334	0.967533	0.765926	0.775849
SAOUHSC_01095	3	rnhC	NA	Q2FZD7	RNA Metabolism / RNA processing and modification / Ribonuclease H / Ribonuclease HIII (EC 3.1.26.4); CBSS-198094.1.peg.4426 / Ribonuclease HIII (EC 3.1.26.4)	Ribonuclease HIII (RNase HIII) (EC 3.1.26.4)	DNA replication, removal of RNA primer [GO:0043137]; mismatch repair [GO:0006298]	K03471;	-0.01	-0.2	-0.55	-0.35	0.01	-0.37	-0.69	-0.48	0.769103	0.0341194	0.0131104	0.999334	0.606855	0.771421	0.903706
SAOUHSC_01098	3	polX	NA	Q2FZD4	CBSS-198094.1.peg.4426 / DNA polymerase X family	DNA-dependent DNA polymerase beta chain, putative	DNA repair [GO:0006281]	K02347;	-0.11	0.18	0.2	0.23	0.11	0.11	0.32	0.48	0.804436	0.465167	0.234855	0.999334	0.722198	0.894727	0.982857
SAOUHSC_01099	8	mutS2	NA	Q2FZD3	DNA Metabolism / DNA repair / DNA repair, bacterial MutL-MutS system / Recombination inhibitory protein MutS2; CBSS-198094.1.peg.4426 / Recombination inhibitory protein MutS2	Endonuclease MutS2 (EC 3.1.-.-)	mismatch repair [GO:0006298]; negative regulation of DNA recombination [GO:0045910]	K07456;	0.06	-0.02	0.04	0.15	-0.06	-0.04	-0.28	0.18	0.474843	0.472092	0.0535271	0.999334	0.990596	0.53066	0.924306
SAOUHSC_01100	6	trxA	NA	Q2FZD2	Thioredoxin	Thioredoxin (Trx)	cell redox homeostasis [GO:0045454]; cellular response to oxidative stress [GO:0034599]; glycerol ether metabolic process [GO:0006662]	K03671;	0.16	-0.91	-0.55	-0.05	-0.16	-0.86	-0.71	-0.98	0.628091	0.0294546	0.224577	0.999334	0.856432	0.922089	0.814727
SAOUHSC_01104	10	sdhA	SigB	Q2FZC8	Serine-glyoxylate cycle / Succinate dehydrogenase flavoprotein subunit (EC 1.3.5.1); Succinate dehydrogenase / Succinate dehydrogenase flavoprotein subunit (EC 1.3.5.1); TCA Cycle / Succinate dehydrogenase flavoprotein subunit (EC 1.3.5.1)	Succinate dehydrogenase, flavoprotein chain TC0881, putative (EC 1.3.99.1)	anaerobic respiration [GO:0009061]	K00239;	0	-0.6	0.82	0.67	0	-0.53	0.76	0.56	0.730997	0.000594391	2.34e-06	0.999334	0.910797	0.778043	0.910615
SAOUHSC_01105	3	sdhB	SigB	Q2FZC7	Serine-glyoxylate cycle / Succinate dehydrogenase iron-sulfur protein (EC 1.3.5.1); Succinate dehydrogenase / Succinate dehydrogenase iron-sulfur protein (EC 1.3.5.1); TCA Cycle / Succinate dehydrogenase iron-sulfur protein (EC 1.3.5.1)	Iron-sulphur subunit of succinate dehydrogenase, putative	aerobic respiration [GO:0009060]; respiratory electron transport chain [GO:0022904]; tricarboxylic acid cycle [GO:0006099]	K00240;	-0.94	0.51	1.71	1.13	0.94	0.63	1.48	1.64	0.131427	0.0107048	0.00419587	0.0851405	0.33811	0.0892497	0.433651
SAOUHSC_01106	8	murI	SigB	Q2FZC6	Amino Acids and Derivatives / Glutamine, glutamate, aspartate, asparagine; ammonia assimilation / Glutamine, Glutamate, Aspartate and Asparagine Biosynthesis / Glutamate racemase (EC 5.1.1.3); Cell Wall and Capsule / Cell Wall and Capsule - no subcategory / Peptidoglycan Biosynthesis / Glutamate racemase (EC 5.1.1.3)	Glutamate racemase (EC 5.1.1.3)	cell wall organization [GO:0071555]; peptidoglycan biosynthetic process [GO:0009252]; regulation of cell shape [GO:0008360]	K01776;	-0.03	-0.56	-0.14	0.42	0.03	-0.27	-0.01	0.41	0.461983	0.00417304	0.00105236	0.999334	0.644133	0.847954	0.878526
SAOUHSC_01107	7	-	SigB	Q2FZC5	Nucleosides and Nucleotides / Detoxification / Housecleaning nucleoside triphosphate pyrophosphatases / Nucleoside 5-triphosphatase RdgB (dHAPTP, dITP, XTP-specific) (EC 3.6.1.15); Stress Response / Heat shock / Heat shock dnaK gene cluster extended / Nucleoside 5-triphosphatase RdgB (dHAPTP, dITP, XTP-specific) (EC 3.6.1.15)	dITP/XTP pyrophosphatase (EC 3.6.1.66) (Non-canonical purine NTP pyrophosphatase) (Non-standard purine NTP pyrophosphatase) (Nucleoside-triphosphate diphosphatase) (Nucleoside-triphosphate pyrophosphatase) (NTPase)	nucleoside triphosphate catabolic process [GO:0009143]; nucleotide metabolic process [GO:0009117]; purine nucleoside triphosphate catabolic process [GO:0009146]	K02428;	0.04	-0.39	-0.37	0.45	-0.04	-0.18	-0.41	0.42	0.266941	0.0029189	0.000402956	0.999334	0.324689	0.922089	0.902562
SAOUHSC_01134	2	-	NA	Q2FZA5	FIG01108732: hypothetical protein	Uncharacterized protein			-0.01	-0.1	0.02	-0.94	0.01	-0.03	-0.39	-0.97	0.905231	0.00470041	0.0567669	0.999334	0.993555	0.808397	0.924306
SAOUHSC_01137	2	-	NA	Q2FZA2	Housecleaning nucleoside triphosphate pyrophosphatases / Pyrimidine 5'-nucleotidase YjjG (EC 3.1.3.5)	Uncharacterized protein	metabolic process [GO:0008152]	K07025;	-0.14	-0.5	-0.31	-0.61	0.14	-3.68	-0.04	-0.74	0.149901	0.371514	0.000705293	0.999334	0.119151	0.901182	0.889158
SAOUHSC_01138	4	-	NA	Q2FZA1	Uncharacterized N-acetyltransferase BT9727_3663 (EC 2.3.1.-)	Uncharacterized N-acetyltransferase SAOUHSC_01138 (EC 2.3.1.-)			0	-0.56	0.9	1.35	0	-0.22	1.18	1.32	0.385228	0.000104816	1.29e-07	0.999334	0.33811	0.527876	0.973458
SAOUHSC_01143	8	mraW	NA	P60393	Bacterial Cell Division / 16S rRNA (cytosine(1402)-N(4))-methyltransferase EC 2.1.1.199)	Ribosomal RNA small subunit methyltransferase H (EC 2.1.1.199) (16S rRNA m(4)C1402 methyltransferase) (rRNA (cytosine-N(4)-)-methyltransferase RsmH)	rRNA base methylation [GO:0070475]	K03438;	0.02	0.09	-0.03	-0.1	-0.02	0.02	-0.19	-0.13	0.778358	0.253774	0.136131	0.999334	0.800692	0.67172	0.970543
SAOUHSC_01145	16	pbp1	NA	Q2FZ94	Cell Division and Cell Cycle / Cell Division and Cell Cycle - no subcategory / Bacterial Cytoskeleton / Cell division protein FtsI [Peptidoglycan synthetase] (EC 2.4.1.129); Cell Wall and Capsule / Cell Wall and Capsule - no subcategory / Peptidoglycan Biosynthesis / Cell division protein FtsI [Peptidoglycan synthetase] (EC 2.4.1.129); Bacterial Cell Division / Cell division protein FtsI [Peptido…	Penicillin-binding protein 1		K12552;	0.03	-0.13	-0.15	0.29	-0.03	-0.06	-0.12	-0.09	0.2494	0.0629433	0.948159	0.999334	0.990596	0.820551	0.420909
SAOUHSC_01147	15	murD	NA	Q2FZ92	Cell Wall and Capsule / Cell Wall and Capsule - no subcategory / Peptidoglycan Biosynthesis / UDP-N-acetylmuramoylalanine--D-glutamate ligase (EC 6.3.2.9); Cell Wall and Capsule / Cell Wall and Capsule - no subcategory / Peptidoglycan biosynthesis--gjo / UDP-N-acetylmuramoylalanine--D-glutamate ligase (EC 6.3.2.9)	UDP-N-acetylmuramoylalanine--D-glutamate ligase (EC 6.3.2.9) (D-glutamic acid-adding enzyme) (UDP-N-acetylmuramoyl-L-alanyl-D-glutamate synthetase)	cell cycle [GO:0007049]; cell division [GO:0051301]; cell wall organization [GO:0071555]; peptidoglycan biosynthetic process [GO:0009252]; regulation of cell shape [GO:0008360]	K01925;	-0.04	0	-0.01	0.11	0.04	-0.16	-0.09	-0.11	0.248065	0.426093	0.0721711	0.999334	0.256373	0.394454	0.293534
SAOUHSC_01148	9	divIB	NA	Q2FZ91	Cell Division and Cell Cycle / Cell Division and Cell Cycle - no subcategory / Bacterial Cytoskeleton / Cell division protein FtsQ; Bacterial Cell Division / Cell division protein FtsQ; cell division cluster containing FtsQ / Cell division protein FtsQ; Cell Division Cluster / Cell division protein FtsQ	Cell division protein DivIB	cell cycle [GO:0007049]; cell division [GO:0051301]	K03589;	0.03	-0.26	-0.1	0.1	-0.03	-0.15	-0.62	0.03	0.458973	0.180166	0.149839	0.999334	0.855431	0.53066	0.986013
SAOUHSC_01149	12	ftsA	NA	O07325	Cell Division and Cell Cycle / Cell Division and Cell Cycle - no subcategory / Bacterial Cytoskeleton / Cell division protein FtsA; Bacterial Cell Division / Cell division protein FtsA; cell division cluster containing FtsQ / Cell division protein FtsA; Cell Division Cluster / Cell division protein FtsA	Cell division protein FtsA	cell cycle [GO:0007049]; cell division [GO:0051301]	K03590;	-0.02	-0.09	-0.12	0.3	0.02	-0.06	-0.04	0.27	0.713318	0.0695622	0.0089537	0.999334	0.767732	0.84977	0.657427
SAOUHSC_01150	22	ftsZ	NA	Q2FZ89	Cell Division and Cell Cycle / Cell Division and Cell Cycle - no subcategory / Bacterial Cytoskeleton / Cell division protein FtsZ (EC 3.4.24.-); Bacterial Cell Division / Cell division protein FtsZ (EC 3.4.24.-); cell division cluster containing FtsQ / Cell division protein FtsZ (EC 3.4.24.-); Cell Division Cluster / Cell division protein FtsZ (EC 3.4.24.-)	Cell division protein FtsZ	cell cycle [GO:0007049]; cell division [GO:0051301]	K03531;	0.03	-0.14	0.05	0.37	-0.03	-0.06	0.16	0.39	0.809272	0.0986468	0.00137378	0.999334	0.784181	0.704642	0.977138
SAOUHSC_01153	3	-	NA	Q2FZ87	A Hypothetical Protein Related to Proline Metabolism / UPF0001 protein YggS; Cell Division Cluster / UPF0001 protein YggS	Pyridoxal phosphate homeostasis protein (PLP homeostasis protein)		K06997;	0.33	0.19	0.09	-0.03	-0.33	-0.11	-1.22	-0.85	0.74213	0.465712	0.285075	0.999334	0.571172	0.765926	0.8542
SAOUHSC_01154	4	sepF	NA	Q2FZ86	Cell Division Cluster / SepF, FtsZ-interacting protein related to cell division	Cell division protein SepF	cell septum assembly [GO:0090529]	K09772;	0.02	-0.28	-0.54	-0.13	-0.02	-0.21	-0.44	-0.12	0.936969	0.0605227	0.0412804	0.999334	0.819131	0.886994	0.931932
SAOUHSC_01158	8	-	NA	Q2FZ83	Cell Division and Cell Cycle / Cell Division and Cell Cycle - no subcategory / Bacterial Cytoskeleton / Cell division initiation protein DivIVA; Bacterial Cell Division / Cell division initiation protein DivIVA; Cell Division Cluster / Cell division initiation protein DivIVA	Uncharacterized protein	cell cycle [GO:0007049]; cell division [GO:0051301]	K04074;	0.01	-0.3	-0.02	0.46	-0.01	-0.22	-0.17	0.25	0.680968	0.101597	0.472904	0.999334	0.99928	0.610959	0.992907
SAOUHSC_01159	29	ileS	NA	Q2FZ82	Cell Division Cluster / Isoleucyl-tRNA synthetase (EC 6.1.1.5)	Isoleucine--tRNA ligase (EC 6.1.1.5) (Isoleucyl-tRNA synthetase) (IleRS)	isoleucyl-tRNA aminoacylation [GO:0006428]	K01870;	-0.01	-0.03	0.06	-0.01	0.01	0.03	0.1	0.08	0.909344	0.598531	0.6279	0.999334	0.990596	0.856796	0.970543
SAOUHSC_01163	9	-	NA	Q2FZ78	Ribosome biogenesis bacterial / Ribosomal large subunit pseudouridine synthase D (EC 5.4.99.23)	Pseudouridine synthase (EC 5.4.99.-)	enzyme-directed rRNA pseudouridine synthesis [GO:0000455]	K06180;	-0.01	0.3	0.24	0.24	0.01	0.05	0.19	0.08	0.333053	0.0986468	0.263856	0.999334	0.28348	0.963673	0.947117
SAOUHSC_01164	11	pyrR	NA	Q2FZ77	Nucleosides and Nucleotides / Pyrimidines / De Novo Pyrimidine Synthesis / Pyrimidine operon regulatory protein PyrR; LMPTP YwlE cluster / Pyrimidine operon regulatory protein PyrR; pyrimidine conversions / Pyrimidine operon regulatory protein PyrR	Bifunctional protein PyrR [Includes: Pyrimidine operon regulatory protein; Uracil phosphoribosyltransferase (UPRTase) (EC 2.4.2.9)]	DNA-templated transcription, termination [GO:0006353]; nucleoside metabolic process [GO:0009116]; regulation of transcription, DNA-templated [GO:0006355]	K02825;	-0.01	-0.22	-0.29	-0.46	0.01	0.24	-0.12	-0.24	0.344032	0.0712091	0.0206097	0.999334	0.267015	0.912458	0.730627
SAOUHSC_01166	5	pyrB	NA	Q2FZ75	Nucleosides and Nucleotides / Pyrimidines / De Novo Pyrimidine Synthesis / Aspartate carbamoyltransferase (EC 2.1.3.2)	Aspartate carbamoyltransferase (EC 2.1.3.2) (Aspartate transcarbamylase) (ATCase)	'de novo' pyrimidine nucleobase biosynthetic process [GO:0006207]; 'de novo' UMP biosynthetic process [GO:0044205]; cellular amino acid metabolic process [GO:0006520]; pyrimidine ribonucleotide biosynthetic process [GO:0009220]	K00609;	0.02	-0.17	-0.38	-0.59	-0.02	0.54	-0.3	-0.39	0.0841217	0.0879549	0.000331972	0.999334	0.0537694	0.861577	0.903706
SAOUHSC_01168	10	pyrC	NA	Q2FZ74	Nucleosides and Nucleotides / Pyrimidines / De Novo Pyrimidine Synthesis / Dihydroorotase (EC 3.5.2.3)	Dihydroorotase (DHOase) (EC 3.5.2.3)	'de novo' UMP biosynthetic process [GO:0044205]; purine nucleobase catabolic process [GO:0006145]	K01465;	0.03	0.13	-0.43	-0.45	-0.03	0.67	0.06	-0.46	0.203711	0.0708519	0.00101055	0.999334	0.122895	0.737358	0.902562
SAOUHSC_01169	10	carA	NA	Q2FZ73	Nucleosides and Nucleotides / Pyrimidines / De Novo Pyrimidine Synthesis / Carbamoyl-phosphate synthase small chain (EC 6.3.5.5)	Carbamoyl-phosphate synthase small chain (EC 6.3.5.5) (Carbamoyl-phosphate synthetase glutamine chain)	'de novo' pyrimidine nucleobase biosynthetic process [GO:0006207]; 'de novo' UMP biosynthetic process [GO:0044205]; arginine biosynthetic process [GO:0006526]; glutamine metabolic process [GO:0006541]; urea cycle [GO:0000050]	K01956;	0.04	-0.27	-0.52	-0.71	-0.04	0.52	-0.17	-0.69	0.049605	0.0776751	7.9e-06	0.999334	0.0272453	0.605778	0.903729
SAOUHSC_01170	33	carB	NA	Q2FZ72	Nucleosides and Nucleotides / Pyrimidines / De Novo Pyrimidine Synthesis / Carbamoyl-phosphate synthase large chain (EC 6.3.5.5)	Carbamoyl-phosphate synthase large chain (EC 6.3.5.5) (Carbamoyl-phosphate synthetase ammonia chain)	'de novo' UMP biosynthetic process [GO:0044205]; arginine biosynthetic process [GO:0006526]; urea cycle [GO:0000050]	K01955;	0.03	-0.01	-0.6	-0.69	-0.03	0.59	-0.14	-0.46	0.186804	0.0873707	0.00014821	0.999334	0.117843	0.799074	0.658988
SAOUHSC_01171	6	pyrF	NA	Q2FZ71	Nucleosides and Nucleotides / Pyrimidines / De Novo Pyrimidine Synthesis / Orotidine 5'-phosphate decarboxylase (EC 4.1.1.23)	Orotidine 5'-phosphate decarboxylase (EC 4.1.1.23) (OMP decarboxylase) (OMPDCase) (OMPdecase)	'de novo' pyrimidine nucleobase biosynthetic process [GO:0006207]; 'de novo' UMP biosynthetic process [GO:0044205]	K01591;	-0.12	-0.12	-0.77	-0.55	0.12	0.76	0.41	-0.31	0.599946	0.587698	0.142989	0.581151	0.775437	0.502852	0.657427
SAOUHSC_01172	5	pyrE	NA	Q2FZ70	Nucleosides and Nucleotides / Pyrimidines / De Novo Pyrimidine Synthesis / Orotate phosphoribosyltransferase (EC 2.4.2.10)	Orotate phosphoribosyltransferase (OPRT) (OPRTase) (EC 2.4.2.10)	'de novo' UMP biosynthetic process [GO:0044205]	K00762;	-0.03	-0.05	-0.58	-1.43	0.03	0.71	-0.04	-0.61	0.133733	0.00832472	0.000353171	0.999334	0.122895	0.992154	0.437044
SAOUHSC_01175	10	-	NA	Q2G1U1	Fibronectin/fibrinogen-binding protein	Fibronectin-binding protein A-related			-0.01	0.1	0.09	0	0.01	0.02	0.1	0.09	0.768203	0.376618	0.952155	0.999334	0.989044	0.966611	0.826383
SAOUHSC_01176	3	gmk	NA	Q2G1U0	Nucleosides and Nucleotides / Purines / Purine conversions / Guanylate kinase (EC 2.7.4.8)	Guanylate kinase (EC 2.7.4.8) (GMP kinase)		K00942;	0.03	0.07	0.01	-0.15	-0.03	-0.02	0.1	0.07	0.469005	0.207253	0.459903	0.999334	0.879217	0.810006	0.413946
SAOUHSC_01177	5	rpoZ	NA	Q2G1T9	RNA Metabolism / Transcription / RNA polymerase bacterial / DNA-directed RNA polymerase omega subunit (EC 2.7.7.6); CBSS-176299.4.peg.1292 / DNA-directed RNA polymerase omega subunit (EC 2.7.7.6)	DNA-directed RNA polymerase subunit omega (RNAP omega subunit) (EC 2.7.7.6) (RNA polymerase omega subunit) (Transcriptase subunit omega)	transcription, DNA-templated [GO:0006351]	K03060;	-0.04	0.22	0.14	-0.1	0.04	-0.06	-0.11	-0.16	0.289914	0.203119	0.552723	0.999334	0.201893	0.452072	0.812905
SAOUHSC_01178	12	coaBC	NA	Q2G268	Coenzyme A Biosynthesis / Phosphopantothenoylcysteine decarboxylase (EC 4.1.1.36) / Phosphopantothenoylcysteine synthetase (EC 6.3.2.5)	Coenzyme A biosynthesis bifunctional protein CoaBC (EC 4.1.1.36) (EC 6.3.2.5) (DNA/pantothenate metabolism flavoprotein)	coenzyme A biosynthetic process [GO:0015937]; pantothenate catabolic process [GO:0015941]	K13038;	-0.03	-0.17	-0.19	-0.06	0.03	-0.2	-0.36	-0.23	0.375418	0.138814	0.0319308	0.999334	0.990596	0.452072	0.495728
SAOUHSC_01179	9	priA	NA	Q2G266	DNA Metabolism / DNA replication / DNA-replication / Helicase PriA essential for oriC/DnaA-independent DNA replication; Conserved gene cluster associated with Met-tRNA formyltransferase / Helicase PriA essential for oriC/DnaA-independent DNA replication	Primosomal protein N' (EC 3.6.4.-) (ATP-dependent helicase PriA)	DNA recombination [GO:0006310]; DNA replication, synthesis of RNA primer [GO:0006269]; DNA replication initiation [GO:0006270]; DNA unwinding involved in DNA replication [GO:0006268]; double-strand break repair [GO:0006302]	K04066;	-0.06	-0.09	-0.11	0.13	0.06	-0.2	-0.03	0.22	0.792437	0.0629433	0.323118	0.999334	0.938878	0.81314	0.967193
SAOUHSC_01183	12	fmt	NA	Q2FZ68	Cofactors, Vitamins, Prosthetic Groups, Pigments / Folate and pterines / Folate Biosynthesis / Methionyl-tRNA formyltransferase (EC 2.1.2.9); Protein Metabolism / Protein biosynthesis / Translation initiation factors bacterial / Methionyl-tRNA formyltransferase (EC 2.1.2.9); Conserved gene cluster associated with Met-tRNA formyltransferase / Methionyl-tRNA formyltransferase (EC 2.1.2.9)	Methionyl-tRNA formyltransferase (EC 2.1.2.9)		K00604;	-0.01	0	-0.01	-0.16	0.01	-0.1	-0.08	-0.13	0.871207	0.446027	0.367108	0.999334	0.861524	0.799941	0.997385
SAOUHSC_01184	9	sun	NA	Q2FZ67	Conserved gene cluster associated with Met-tRNA formyltransferase / Ribosomal RNA small subunit methyltransferase B (EC 2.1.1.-)	16S rRNA (cytosine(967)-C(5))-methyltransferase (EC 2.1.1.176)	regulation of transcription, DNA-templated [GO:0006355]; rRNA base methylation [GO:0070475]	K03500;	-0.05	0.24	0.15	-0.22	0.05	0.02	-0.2	-0.17	0.131466	0.0490189	0.022779	0.999334	0.324689	0.185888	0.997378
SAOUHSC_01185	10	-	NA	Q2FZ66	Conserved gene cluster associated with Met-tRNA formyltransferase / 23S rRNA (adenine(2503)-C(2))-methyltransferase; Conserved gene cluster associated with Met-tRNA formyltransferase / tRNA (adenine(37)-C(2))-methyltransferase (EC 2.1.1.192)	Probable dual-specificity RNA methyltransferase RlmN (EC 2.1.1.192) (23S rRNA (adenine(2503)-C(2))-methyltransferase) (23S rRNA m2A2503 methyltransferase) (Ribosomal RNA large subunit methyltransferase N) (tRNA (adenine(37)-C(2))-methyltransferase) (tRNA m2A37 methyltransferase)	response to antibiotic [GO:0046677]; rRNA base methylation [GO:0070475]	K06941;	0.04	0.05	-1.1	-1.07	-0.04	0	-1.22	-0.96	0.511989	7.33e-05	5.98e-06	0.999334	0.990596	0.71441	0.801035
SAOUHSC_01186	5	stp1	NA	Q2FZ65	Conserved gene cluster associated with Met-tRNA formyltransferase / Protein serine/threonine phosphatase PrpC, regulation of stationary phase	Uncharacterized protein		K20074;	0.02	0.07	0.01	-0.03	-0.02	0.09	-0.07	0.07	0.81586	0.544656	0.247072	0.999334	0.968051	0.975696	0.801035
SAOUHSC_01187	10	pknB	NA	Q2FZ64	A Gram-positive cluster that relates ribosomal protein L28P to a set of uncharacterized proteins / Serine/threonine protein kinase PrkC, regulator of stationary phase; Conserved gene cluster associated with Met-tRNA formyltransferase / Serine/threonine protein kinase PrkC, regulator of stationary phase	Uncharacterized protein		K12132;	0	0.11	-0.03	-0.01	0	-0.06	-0.74	-0.29	0.452865	0.420677	0.0379286	0.999334	0.930825	0.386443	0.730627
SAOUHSC_01188	3	rsgA	NA	Q2FZ63	Protein Metabolism / Protein biosynthesis / Universal GTPases / Ribosome small subunit-stimulated GTPase EngC; A Gram-positive cluster that relates ribosomal protein L28P to a set of uncharacterized proteins / Ribosome small subunit-stimulated GTPase EngC	Small ribosomal subunit biogenesis GTPase RsgA (EC 3.6.1.-)	ribosomal small subunit biogenesis [GO:0042274]	K06949;	-0.02	-0.01	0.12	0.06	0.02	0.16	-0.19	-0.05	0.121484	0.683724	0.0399462	0.999334	0.620005	0.283979	0.903706
SAOUHSC_01190	2	thiN	NA	Q2FZ61	Cofactors, Vitamins, Prosthetic Groups, Pigments / Cofactors, Vitamins, Prosthetic Groups, Pigments - no subcategory / Thiamin biosynthesis / Thiamin pyrophosphokinase (EC 2.7.6.2); A Gram-positive cluster that relates ribosomal protein L28P to a set of uncharacterized proteins / Thiamin pyrophosphokinase (EC 2.7.6.2)	Uncharacterized protein	thiamine diphosphate biosynthetic process [GO:0009229]; thiamine metabolic process [GO:0006772]	K00949;	-0.01	-0.38	-1.23	0.78	0.01	0.09	-0.35	0.81	0.148594	0.0470196	0.00208123	0.999334	0.910474	0.229553	0.978326
SAOUHSC_01191	3	rpmB	NA	Q2FZ60	Protein Metabolism / Protein biosynthesis / Ribosome LSU bacterial / LSU ribosomal protein L28p; A Gram-positive cluster that relates ribosomal protein L28P to a set of uncharacterized proteins / LSU ribosomal protein L28p; A Gram-positive cluster that relates ribosomal protein L28P to a set of uncharacterized proteins / LSU ribosomal protein L28p, zinc-independent	50S ribosomal protein L28	translation [GO:0006412]	K02902;	0.06	0.47	0.19	-0.73	-0.06	0.18	-0.01	-0.74	0.844347	0.0286784	0.00820993	0.999334	0.722198	0.894727	0.991344
SAOUHSC_01192	4	-	NA	Q2FZ59	A Gram-positive cluster that relates ribosomal protein L28P to a set of uncharacterized proteins / FIG001802: Putative alkaline-shock protein	Uncharacterized protein			0.02	-0.13	0	-0.22	-0.02	-0.1	-0.13	-0.4	0.341668	0.535354	0.0587894	0.999334	0.896005	0.606565	0.557488
SAOUHSC_01193	15	fakA	NA	Q2FZ58	A Gram-positive cluster that relates ribosomal protein L28P to a set of uncharacterized proteins / Dihydroxyacetone kinase-like protein, phosphatase domain / Dihydroxyacetone kinase-like protein, kinase domain; Glycerolipid and Glycerophospholipid Metabolism in Bacteria / Dihydroxyacetone kinase-like protein, phosphatase domain / Dihydroxyacetone kinase-like protein, kinase domain	Uncharacterized protein SAOUHSC_01193	glycerol metabolic process [GO:0006071]	K07030;	0	-0.02	-0.1	-0.33	0	-0.06	-0.25	-0.59	0.277459	0.068821	0.000177855	0.999334	0.967161	0.699562	0.307826
SAOUHSC_01194	3	recG	NA	O50581	DNA Metabolism / DNA replication / DNA-replication / ATP-dependent DNA helicase RecG (EC 3.6.1.-); RNA Metabolism / Transcription / Transcription factors bacterial / ATP-dependent DNA helicase RecG (EC 3.6.1.-); A Gram-positive cluster that relates ribosomal protein L28P to a set of uncharacterized proteins / ATP-dependent DNA helicase RecG (EC 3.6.1.-)	ATP-dependent DNA helicase RecG (EC 3.6.4.12)	DNA recombination [GO:0006310]; DNA repair [GO:0006281]; RNA secondary structure unwinding [GO:0010501]	K03655;	-0.07	-0.21	-0.23	0.06	0.07	-0.02	-1.04	-2.09	0.230775	0.352014	0.0444292	0.999334	0.990596	0.606565	0.320408
SAOUHSC_01197	10	plsX	NA	Q2FZ55	Fatty Acids, Lipids, and Isoprenoids / Phospholipids / Glycerolipid and Glycerophospholipid Metabolism in Bacteria / Phosphate:acyl-ACP acyltransferase PlsX; COG1399 / Phosphate:acyl-ACP acyltransferase PlsX	Phosphate acyltransferase (EC 2.3.1.n2) (Acyl-ACP phosphotransacylase) (Acyl-[acyl-carrier-protein]--phosphate acyltransferase) (Phosphate-acyl-ACP acyltransferase)	fatty acid biosynthetic process [GO:0006633]; phospholipid biosynthetic process [GO:0008654]	K03621;	-0.01	0.35	0	-0.09	0.01	0.15	-0.01	-0.35	0.788086	0.1623	0.144513	0.999334	0.986176	0.69911	0.824907
SAOUHSC_01198	5	fabD	NA	Q2FZ54	Fatty Acids, Lipids, and Isoprenoids / Fatty acids / Fatty Acid Biosynthesis FASII / Malonyl CoA-acyl carrier protein transacylase (EC 2.3.1.39); COG1399 / Malonyl CoA-acyl carrier protein transacylase (EC 2.3.1.39)	Malonyl CoA-acyl carrier protein transacylase (EC 2.3.1.39)	metabolic process [GO:0008152]	K00645;	-0.08	0.28	-0.08	-0.36	0.08	0.02	0.1	-0.32	0.275938	0.05791	0.00337138	0.999334	0.517793	0.61133	0.924306
SAOUHSC_01199	12	fabG	NA	Q2FZ53	Fatty Acids, Lipids, and Isoprenoids / Fatty acids / Fatty Acid Biosynthesis FASII / 3-oxoacyl-[acyl-carrier protein] reductase (EC 1.1.1.100); COG1399 / 3-oxoacyl-[acyl-carrier protein] reductase (EC 1.1.1.100)	3-oxoacyl-(Acyl-carrier-protein) reductase, putative (EC 1.1.1.100)	fatty acid biosynthetic process [GO:0006633]	K00059;	-0.04	0.47	0.36	0.18	0.04	0.3	0.16	0.09	0.252311	0.00516331	0.105653	0.999334	0.225769	0.251936	0.496284
SAOUHSC_01201	4	acpP	NA	Q2FZ51	Fatty Acids, Lipids, and Isoprenoids / Fatty acids / Fatty Acid Biosynthesis FASII / Acyl carrier protein; Fatty Acids, Lipids, and Isoprenoids / Phospholipids / Glycerolipid and Glycerophospholipid Metabolism in Bacteria / Acyl carrier protein; COG1399 / Acyl carrier protein; COG1399 / HmrB protein involved in methicillin resistance	Acyl carrier protein (ACP)	lipid A biosynthetic process [GO:0009245]	K02078;	0.06	0.36	-0.04	-0.51	-0.06	-0.05	-0.21	-0.63	0.661599	0.0132244	0.00186056	0.999334	0.606837	0.857601	0.979773
SAOUHSC_01203	3	rnc	NA	Q2FZ50	Cell Division and Cell Cycle / Cell Division and Cell Cycle - no subcategory / Two cell division clusters relating to chromosome partitioning / Ribonuclease III (EC 3.1.26.3); RNA Metabolism / RNA processing and modification / RNA processing and degradation, bacterial / Ribonuclease III (EC 3.1.26.3); CBSS-176299.4.peg.1292 / Ribonuclease III (EC 3.1.26.3); COG1399 / Ribonuclease III (EC 3.1.26.3)	Ribonuclease 3 (EC 3.1.26.3) (Ribonuclease III) (RNase III)	mRNA processing [GO:0006397]; RNA phosphodiester bond hydrolysis, endonucleolytic [GO:0090502]; RNA processing [GO:0006396]; rRNA catabolic process [GO:0016075]; rRNA processing [GO:0006364]; tRNA processing [GO:0008033]	K03685;	-0.02	0.2	0.04	-0.36	0.02	0.13	-0.17	0	0.528284	0.3065	0.386687	0.999334	0.960816	0.552234	0.931932
SAOUHSC_01204	21	smc	NA	Q2FZ49	Cell Division and Cell Cycle / Cell Division and Cell Cycle - no subcategory / Two cell division clusters relating to chromosome partitioning / Chromosome partition protein smc; COG1399 / Chromosome partition protein smc	Chromosome partition protein Smc	chromosome condensation [GO:0030261]; DNA replication [GO:0006260]; sister chromatid cohesion [GO:0007062]	K03529;	-0.02	0.37	0.08	-0.25	0.02	0.14	0.1	-0.37	0.407498	0.00349422	0.00221045	0.999334	0.383379	0.935553	0.539574
SAOUHSC_01205	9	ftsY	NA	Q2FZ48	Cell Division and Cell Cycle / Cell Division and Cell Cycle - no subcategory / Two cell division clusters relating to chromosome partitioning / Signal recognition particle receptor protein FtsY (=alpha subunit) (TC 3.A.5.1.1); Protein Metabolism / Protein biosynthesis / Universal GTPases / Signal recognition particle receptor protein FtsY (=alpha subunit) (TC 3.A.5.1.1); Bacterial Cell Division /…	Signal recognition particle receptor FtsY (SRP receptor)	SRP-dependent cotranslational protein targeting to membrane [GO:0006614]	K03110;	0.06	0.13	-0.04	-0.14	-0.06	0.06	-0.2	-0.18	0.909344	0.206531	0.198709	0.999334	0.960816	0.894727	0.950337
SAOUHSC_01207	14	ffh	NA	Q2FZ46	Cell Division and Cell Cycle / Cell Division and Cell Cycle - no subcategory / Two cell division clusters relating to chromosome partitioning / Signal recognition particle, subunit Ffh SRP54 (TC 3.A.5.1.1); Protein Metabolism / Protein biosynthesis / Universal GTPases / Signal recognition particle, subunit Ffh SRP54 (TC 3.A.5.1.1)	Signal recognition particle protein (Fifty-four homolog)	SRP-dependent cotranslational protein targeting to membrane [GO:0006614]	K03106;	0.03	-0.13	-0.23	-0.1	-0.03	-0.18	-0.14	-0.2	0.275938	0.191548	0.22965	0.999334	0.990596	0.428722	0.850383
SAOUHSC_01208	3	rpsP	NA	Q2FZ45	Protein Metabolism / Protein biosynthesis / Ribosome SSU bacterial / SSU ribosomal protein S16p	30S ribosomal protein S16	translation [GO:0006412]	K02959;	-0.02	0.42	0.3	-0.2	0.02	0.03	0.1	-0.25	0.354209	0.0295397	0.0388028	0.999334	0.283584	0.773003	0.979773
SAOUHSC_01209	5	rimM	NA	Q2FZ44	Protein Metabolism / Protein biosynthesis / Ribosome biogenesis bacterial / 16S rRNA processing protein RimM	Ribosome maturation factor RimM	rRNA processing [GO:0006364]	K02860;	0.1	1.15	0.6	0.24	-0.1	0.64	0.79	-0.21	0.487624	0.00086233	0.00477557	0.999334	0.591015	0.857601	0.845515
SAOUHSC_01210	2	trmD	NA	Q2FZ43	Protein Metabolism / Protein biosynthesis / Ribosome biogenesis bacterial / tRNA (Guanine37-N1) -methyltransferase (EC 2.1.1.31); RNA Metabolism / RNA processing and modification / tRNA modification Archaea / tRNA (Guanine37-N1) -methyltransferase (EC 2.1.1.31)	tRNA (guanine-N(1)-)-methyltransferase (EC 2.1.1.228) (M1G-methyltransferase) (tRNA [GM37] methyltransferase)		K00554;	-0.01	1.05	0.86	-1.04	0.01	0.9	1	-0.22	0.383017	0.0150363	0.0818218	0.999334	0.855431	0.914156	0.609317
SAOUHSC_01211	7	rplS	NA	Q2FZ42	Protein Metabolism / Protein biosynthesis / Ribosome LSU bacterial / LSU ribosomal protein L19p	50S ribosomal protein L19	translation [GO:0006412]	K02884;	-0.03	0.44	0.34	0.27	0.03	0.17	0.3	0.14	0.186063	0.0095908	0.122849	0.999334	0.101889	0.567757	0.495365
SAOUHSC_01214	7	rbgA	NA	Q2FZ39	Protein Metabolism / Protein biosynthesis / Universal GTPases / 50S ribosomal subunit maturation GTPase RbgA (B. subtilis YlqF); Conserved gene cluster associated with Met-tRNA formyltransferase / 50S ribosomal subunit maturation GTPase RbgA (B. subtilis YlqF)	Ribosome biogenesis GTPase A	ribosome biogenesis [GO:0042254]	K14540;	-0.06	0.32	0.31	0.26	0.06	0.25	0.23	0.19	0.680968	0.144812	0.623175	0.999334	0.510003	0.73842	0.903706
SAOUHSC_01216	20	sucC	NA	Q2FZ37	Carbohydrates / Central carbohydrate metabolism / Dehydrogenase complexes / Succinyl-CoA ligase [ADP-forming] beta chain (EC 6.2.1.5); Carbohydrates / Central carbohydrate metabolism / TCA Cycle / Succinyl-CoA ligase [ADP-forming] beta chain (EC 6.2.1.5); Carbohydrates / One-carbon Metabolism / Serine-glyoxylate cycle / Succinyl-CoA ligase [ADP-forming] beta chain (EC 6.2.1.5)	Succinate--CoA ligase [ADP-forming] subunit beta (EC 6.2.1.5) (Succinyl-CoA synthetase subunit beta) (SCS-beta)	tricarboxylic acid cycle [GO:0006099]	K01903;	0.02	-0.3	0.48	0.47	-0.02	-0.09	0.61	0.42	0.559604	0.00318108	1.2e-05	0.999334	0.46503	0.894727	0.997385
SAOUHSC_01218	7	sucD	NA	Q2FZ36	Carbohydrates / Central carbohydrate metabolism / Dehydrogenase complexes / Succinyl-CoA ligase [ADP-forming] alpha chain (EC 6.2.1.5); Carbohydrates / Central carbohydrate metabolism / TCA Cycle / Succinyl-CoA ligase [ADP-forming] alpha chain (EC 6.2.1.5); Carbohydrates / One-carbon Metabolism / Serine-glyoxylate cycle / Succinyl-CoA ligase [ADP-forming] alpha chain (EC 6.2.1.5)	Succinate--CoA ligase [ADP-forming] subunit alpha (EC 6.2.1.5) (Succinyl-CoA synthetase subunit alpha) (SCS-alpha)	tricarboxylic acid cycle [GO:0006099]	K01902;	-0.02	-0.38	0.42	0.39	0.02	-0.32	0.59	0.43	0.690596	0.0112264	2.34e-06	0.999334	0.986176	0.606565	0.801035
SAOUHSC_01222	12	topA	SigB	Q2FZ32	Conserved gene cluster associated with Met-tRNA formyltransferase / DNA topoisomerase I (EC 5.99.1.2)	DNA topoisomerase 1 (EC 5.99.1.2) (DNA topoisomerase I) (Omega-protein) (Relaxing enzyme) (Swivelase) (Untwisting enzyme)	DNA topological change [GO:0006265]	K03168;	0.04	0.07	-0.02	-0.47	-0.04	-0.09	0.02	-0.54	0.691829	0.0497919	0.0359294	0.999334	0.707454	0.979206	0.801035
SAOUHSC_01223	16	gid	SigB	Q2FZ31	Conserved gene cluster associated with Met-tRNA formyltransferase / Methylenetetrahydrofolate--tRNA-(uracil-5-)-methyltransferase TrmFO (EC 2.1.1.74); Folate Biosynthesis / Methylenetetrahydrofolate--tRNA-(uracil-5-)-methyltransferase TrmFO (EC 2.1.1.74)	Methylenetetrahydrofolate--tRNA-(uracil-5-)-methyltransferase TrmFO (EC 2.1.1.74) (Folate-dependent tRNA (uracil-5-)-methyltransferase) (Folate-dependent tRNA(M-5-U54)-methyltransferase)	tRNA methylation [GO:0030488]; tRNA wobble uridine modification [GO:0002098]	K04094;	0.03	0.43	0.3	0.01	-0.03	0.16	0.11	-0.16	0.355592	0.0170621	0.0135951	0.999334	0.225769	0.702772	0.756441
SAOUHSC_01225	2	clpQ	NA	Q2FZ29	Proteasome bacterial / ATP-dependent protease subunit HslV (EC 3.4.25.2); Proteolysis in bacteria, ATP-dependent / ATP-dependent protease subunit HslV (EC 3.4.25.2)	ATP-dependent protease subunit HslV (EC 3.4.25.2)	proteolysis involved in cellular protein catabolic process [GO:0051603]	K01419;	-0.04	-0.12	0.52	-0.01	0.04	0	-0.64	0.9	0.0303259	0.231379	0.0021257	0.999334	0.991136	0.107818	0.657427
SAOUHSC_01226	12	hslU	NA	Q2FZ28	Protein Metabolism / Protein degradation / Proteasome bacterial / ATP-dependent hsl protease ATP-binding subunit HslU; Protein Metabolism / Protein degradation / Proteolysis in bacteria, ATP-dependent / ATP-dependent hsl protease ATP-binding subunit HslU	ATP-dependent protease ATPase subunit HslU (Unfoldase HslU)		K03667;	0.02	0.33	0.18	0.53	-0.02	0.26	0.21	0.64	0.335762	0.0188094	0.000851101	0.999334	0.679504	0.836747	0.657427
SAOUHSC_01228	13	codY	NA	Q2FZ27	Conserved gene cluster associated with Met-tRNA formyltransferase / GTP-sensing transcriptional pleiotropic repressor codY	GTP-sensing transcriptional pleiotropic repressor CodY	negative regulation of transcription, DNA-templated [GO:0045892]; regulation of transcription, DNA-templated [GO:0006355]; transcription, DNA-templated [GO:0006351]	K03706;	-0.02	0.14	0.22	0.71	0.02	0.15	0.3	0.8	0.998539	0.00516331	0.000100946	0.999334	0.99928	0.990387	0.979773
SAOUHSC_01232	14	rpsB	NA	Q2FZ25	Protein Metabolism / Protein biosynthesis / Ribosome SSU bacterial / SSU ribosomal protein S2p (SAe); CBSS-312309.3.peg.1965 / SSU ribosomal protein S2p (SAe)	30S ribosomal protein S2	translation [GO:0006412]		-0.01	0.44	0.29	0.06	0.01	0.06	0.19	-0.05	0.0841217	0.00597105	0.0670047	0.999334	0.0332873	0.61133	0.574716
SAOUHSC_01234	22	tsf	NA	Q2FZ23	Protein Metabolism / Protein biosynthesis / Translation elongation factors bacterial / Translation elongation factor Ts; CBSS-312309.3.peg.1965 / Translation elongation factor Ts	Elongation factor Ts (EF-Ts)		K02357;	-0.02	0.27	0.21	0.24	0.02	0.04	0.17	0.2	0.562697	0.283354	0.261024	0.999334	0.383379	0.735302	0.871723
SAOUHSC_01235	8	pyrH	NA	Q2FZ22	CBSS-312309.3.peg.1965 / Uridine monophosphate kinase (EC 2.7.4.22)	Uridylate kinase (UK) (EC 2.7.4.22) (Uridine monophosphate kinase) (UMP kinase) (UMPK)	'de novo' CTP biosynthetic process [GO:0044210]	K09903;	-0.01	0.26	0.04	-0.02	0.01	0.07	0.01	-0.05	0.459953	0.0670037	0.680037	0.999334	0.383379	0.990387	0.903706
SAOUHSC_01236	14	frr	NA	Q2FZ21	Protein Metabolism / Protein biosynthesis / Translation termination factors bacterial / Ribosome recycling factor	Ribosome-recycling factor (RRF) (Ribosome-releasing factor)	cytoplasmic translational termination [GO:0002184]	K02838;	0.03	0.26	0.06	-0.01	-0.03	0.11	0.16	-0.15	0.417314	0.0550968	0.0317256	0.999334	0.692478	0.628172	0.936441
SAOUHSC_01237	6	uppS	NA	Q2G1Z7	Fatty Acids, Lipids, and Isoprenoids / Isoprenoids / Isoprenoid Biosynthesis / Undecaprenyl diphosphate synthase (EC 2.5.1.31); Fatty Acids, Lipids, and Isoprenoids / Isoprenoids / Isoprenoinds for Quinones / Undecaprenyl diphosphate synthase (EC 2.5.1.31); Fatty Acids, Lipids, and Isoprenoids / Isoprenoids / Polyprenyl Diphosphate Biosynthesis / Undecaprenyl diphosphate synthase (EC 2.5.1.31)	Isoprenyl transferase (EC 2.5.1.-)	polyprenol biosynthetic process [GO:0016094]	K00806;	0.08	0.33	0.21	0.64	-0.08	0.33	-0.08	0.23	0.546781	0.0299172	0.0812881	0.999334	0.966175	0.894727	0.652469
SAOUHSC_01239	5	-	NA	Q2G1Z5	Regulation and Cell signaling / Regulation and Cell signaling - no subcategory / Sex pheromones in Enterococcus faecalis and other Firmicutes / Membrane-associated zinc metalloprotease; Stress Response / Periplasmic Stress / Periplasmic Stress Response / Membrane-associated zinc metalloprotease	Zinc metalloprotease (EC 3.4.24.-)		K11749;	0	0.37	0.04	0.32	0	0.07	-0.5	0.13	0.414974	0.0747529	0.040552	0.999334	0.843026	0.345968	0.96176
SAOUHSC_01240	27	proS	NA	Q2G1Z4	Prolyl-tRNA synthetase (EC 6.1.1.15), bacterial type	Proline--tRNA ligase (EC 6.1.1.15) (Prolyl-tRNA synthetase) (ProRS)	prolyl-tRNA aminoacylation [GO:0006433]	K01881;	-0.02	0.19	0.11	0.44	0.02	0.09	0.14	0.38	0.604579	0.0132244	0.00129387	0.999334	0.532481	0.929079	0.741125
SAOUHSC_01241	16	polC	NA	Q2G1Z8	DNA-replication / DNA polymerase III polC-type (EC 2.7.7.7)	DNA polymerase III PolC-type (PolIII) (EC 2.7.7.7)	DNA replication [GO:0006260]	K03763;	-0.02	-0.03	-0.14	-0.02	0.02	-0.09	-0.59	-0.26	0.0402675	0.267224	0.000539919	0.999334	0.719986	0.0419558	0.205712
SAOUHSC_01242	3	rimP	NA	Q2G2D3	NusA-TFII Cluster / Bacterial ribosome SSU maturation protein RimP; Transcription factors bacterial / Bacterial ribosome SSU maturation protein RimP	Ribosome maturation factor RimP	ribosomal small subunit assembly [GO:0000028]; translation [GO:0006412]	K09748;	0.14	-0.07	2.94	3.17	-0.14	1.48	3.29	3.61	0.891952	0.00826726	0.0204637	0.999334	0.731499	0.894727	0.927378
SAOUHSC_01243	11	nusA	NA	Q2G2D2	RNA Metabolism / Transcription / Transcription factors bacterial / Transcription termination protein NusA; NusA-TFII Cluster / Transcription termination protein NusA	Transcription termination/antitermination protein NusA	DNA-templated transcription, termination [GO:0006353]; transcription antitermination [GO:0031564]	K02600;	-0.02	0.25	0.25	0.25	0.02	0.08	-0.02	0.03	0.506999	0.238554	0.549735	0.999334	0.54684	0.405079	0.701386
SAOUHSC_01244	2	-	NA	Q2G2D1	RNA Metabolism / Transcription / Transcription factors bacterial / COG2740: Predicted nucleic-acid-binding protein implicated in transcription termination; NusA-TFII Cluster / COG2740: Predicted nucleic-acid-binding protein implicated in transcription termination	Uncharacterized protein		K07742;	0.05	0.36	0.16	-1.34	-0.05	0.33	-0.71	-4.14	0.469005	0.104599	0.101441	0.999334	0.990596	0.53066	0.647203
SAOUHSC_01245	4	-	NA	Q2G2C9	NusA-TFII Cluster / Ribosomal protein L7Ae family protein YlxQ; Transcription factors bacterial / Ribosomal protein L7Ae family protein YlxQ	Uncharacterized protein			0.04	0.63	0.22	0.28	-0.04	0.14	-0.04	0.12	0.525712	0.031975	0.852024	0.999334	0.429488	0.979206	0.970543
SAOUHSC_01246	26	infB	NA	Q2G2D0	Protein Metabolism / Protein biosynthesis / Translation initiation factors bacterial / Translation initiation factor 2; Protein Metabolism / Protein biosynthesis / Universal GTPases / Translation initiation factor 2; CBSS-138119.3.peg.2719 / Translation initiation factor 2; NusA-TFII Cluster / Translation initiation factor 2	Translation initiation factor IF-2		K02519;	0	0.37	0.27	0.42	0	0.17	0.15	0.42	0.176112	0.0252307	0.00181178	0.999334	0.215451	0.708844	0.910615
SAOUHSC_01247	5	rbfA	NA	Q2G2Q4	Protein Metabolism / Protein biosynthesis / Translation initiation factors bacterial / Ribosome-binding factor A; RNA Metabolism / RNA processing and modification / RNA processing and degradation, bacterial / Ribosome-binding factor A; CBSS-138119.3.peg.2719 / Ribosome-binding factor A; NusA-TFII Cluster / Ribosome-binding factor A	Ribosome-binding factor A	rRNA processing [GO:0006364]	K02834;	0.09	0.15	0.05	0.47	-0.09	-0.08	0.2	0.32	0.428108	0.0747637	0.0309686	0.999334	0.89924	0.605712	0.871774
SAOUHSC_01248	8	truB	SigB	Q2G2Q3	Cofactors, Vitamins, Prosthetic Groups, Pigments / Riboflavin, FMN, FAD / Riboflavin, FMN and FAD metabolism Extended / tRNA pseudouridine synthase B (EC 4.2.1.70); RNA Metabolism / RNA processing and modification / tRNA processing / tRNA pseudouridine synthase B (EC 4.2.1.70); CBSS-138119.3.peg.2719 / tRNA pseudouridine synthase B (EC 4.2.1.70)	tRNA pseudouridine synthase B (EC 5.4.99.25) (tRNA pseudouridine(55) synthase) (Psi55 synthase) (tRNA pseudouridylate synthase) (tRNA-uridine isomerase)	mRNA pseudouridine synthesis [GO:1990481]; tRNA modification [GO:0006400]	K03177;	0.03	0.06	-0.01	0.17	-0.03	-0.19	-0.06	-0.09	0.354268	0.384873	0.149122	0.999334	0.324689	0.971036	0.652469
SAOUHSC_01249	12	ribC	SigB	Q2G2Q2	Glutaredoxins / FMN adenylyltransferase (EC 2.7.7.2) / Riboflavin kinase (EC 2.7.1.26); riboflavin to FAD / FMN adenylyltransferase (EC 2.7.7.2) / Riboflavin kinase (EC 2.7.1.26); Riboflavin, FMN and FAD metabolism Extended / FMN adenylyltransferase (EC 2.7.7.2) / Riboflavin kinase (EC 2.7.1.26)	Riboflavin biosynthesis protein [Includes: Riboflavin kinase (EC 2.7.1.26) (Flavokinase); FMN adenylyltransferase (EC 2.7.7.2) (FAD pyrophosphorylase) (FAD synthase)]	FAD biosynthetic process [GO:0006747]; FMN biosynthetic process [GO:0009398]; riboflavin biosynthetic process [GO:0009231]	K11753;	0.06	-0.09	-0.19	0.32	-0.06	-0.28	0.12	0.68	0.189909	0.159277	0.000276852	0.999334	0.980332	0.492331	0.320408
SAOUHSC_01251	23	pnpA	SigB	Q2FZ20	Bacterial RNA-metabolizing Zn-dependent hydrolases / Polyribonucleotide nucleotidyltransferase (EC 2.7.7.8)	Polyribonucleotide nucleotidyltransferase (EC 2.7.7.8) (Polynucleotide phosphorylase) (PNPase)	mRNA catabolic process [GO:0006402]; RNA processing [GO:0006396]	K00962;	0.03	0.32	0.27	0.07	-0.03	0.23	0.06	-0.17	0.706388	0.187214	0.005977	0.999334	0.844159	0.929079	0.887487
SAOUHSC_01252	17	rnjB	NA	Q2FZ19	Bacterial RNA-metabolizing Zn-dependent hydrolases / Ribonuclease J2 (endoribonuclease in RNA processing)	Ribonuclease J 2 (RNase J2) (EC 3.1.-.-)	mRNA processing [GO:0006397]; rRNA processing [GO:0006364]	K12574;	0.02	-0.25	-0.25	-0.05	-0.02	-0.07	-0.15	-0.2	0.602035	0.314622	0.333463	0.999334	0.944311	0.99047	0.742095
SAOUHSC_01253	10	ftsK	NA	Q2FZ18	Cell Division and Cell Cycle / Cell Division and Cell Cycle - no subcategory / Bacterial Cytoskeleton / Cell division protein FtsK; Bacterial Cell Division / Cell division protein FtsK; Bacterial RNA-metabolizing Zn-dependent hydrolases / Cell division protein FtsK	Uncharacterized protein		K03466;	-0.04	0.13	0.08	0.02	0.04	0.18	-0.34	-0.07	0.250099	0.869989	0.0650873	0.999334	0.990596	0.310163	0.69745
SAOUHSC_01254	6	-	SigB	Q2FZ17	Bacterial RNA-metabolizing Zn-dependent hydrolases / Transcriptional regulator in cluster with Zn-dependent hydrolase	Uncharacterized protein	transcription, DNA-templated [GO:0006351]		-0.02	0.04	0.07	0.01	0.02	0.07	-0.08	0.01	0.838309	0.49766	0.937667	0.999334	0.966175	0.699562	0.970543
SAOUHSC_01255	13	-	NA	Q2FZ16	CBSS-257314.1.peg.676 / FIG001621: Zinc protease	Uncharacterized protein			0.01	0.16	-0.06	-0.06	-0.01	0.13	-0.19	-0.31	0.773591	0.327527	0.0748009	0.999334	0.855431	0.674251	0.801035
SAOUHSC_01256	12	-	NA	Q2FZ15	CBSS-257314.1.peg.676 / FIG009210: peptidase, M16 family	Uncharacterized protein			-0.06	0.25	-0.01	0.15	0.06	0.2	0.04	-0.01	0.428288	0.304687	0.265716	0.999334	0.758836	0.678048	0.374341
SAOUHSC_01258	2	-	NA	Q2FZ13	FIG00003568: ACT domain protein	Uncharacterized protein			-0.07	-1.02	0.09	0.02	0.07	-0.18	-0.65	-0.06	0.121484	0.00171798	0.143745	0.999334	0.448952	0.37091	0.950409
SAOUHSC_01259	2	-	NA	Q2FZ12	FIG01108279: hypothetical protein	Uncharacterized protein			-0.84	0.79	0.49	1.05	0.84	0.79	0.64	0.56	0.0143282	0.00498637	0.727061	0.00388909	0.0198873	0.113087	0.0114878
SAOUHSC_01260	3	pgsA	NA	Q2FZ11	Fatty Acids, Lipids, and Isoprenoids / Phospholipids / Glycerolipid and Glycerophospholipid Metabolism in Bacteria / CDP-diacylglycerol--glycerol-3-phosphate 3-phosphatidyltransferase (EC 2.7.8.5); CBSS-257314.1.peg.676 / CDP-diacylglycerol--glycerol-3-phosphate 3-phosphatidyltransferase (EC 2.7.8.5)	CDP-diacylglycerol--glycerol-3-phosphate 3-phosphatidyltransferase (EC 2.7.8.5)	glycerophospholipid biosynthetic process [GO:0046474]	K00995;	-0.83	0.76	0.68	1.11	0.83	0.96	-0.03	0.27	0.286684	0.261637	0.0401468	0.999334	0.767732	0.309036	0.388653
SAOUHSC_01261	11	cinA	NA	Q2FZ10	Cofactors, Vitamins, Prosthetic Groups, Pigments / Riboflavin, FMN, FAD / Riboflavin, FMN and FAD metabolism Extended / N-terminal domain of CinA protein, COG1058; CBSS-257314.1.peg.676 / N-terminal domain of CinA protein, COG1058	Putative competence-damage inducible protein			0.01	-0.56	-0.46	-0.14	-0.01	-0.35	-0.65	-0.51	0.0603382	0.00416197	0.00396678	0.999334	0.40819	0.517747	0.360194
SAOUHSC_01262	12	recA	NA	Q2FZ09	DNA Metabolism / DNA repair / DNA repair, bacterial RecFOR pathway / RecA protein; DNA Metabolism / DNA repair / DNA repair, bacterial UmuCD system / RecA protein; DNA Metabolism / DNA repair / DNA repair, bacterial / RecA protein; DNA Metabolism / DNA replication / DNA-replication / RecA protein; CBSS-257314.1.peg.676 / RecA protein	Protein RecA (Recombinase A)	DNA recombination [GO:0006310]; DNA repair [GO:0006281]; SOS response [GO:0009432]	K03553;	-0.02	-0.26	-0.08	-0.44	0.02	-0.16	-0.18	-0.39	0.469005	0.014503	0.00716844	0.999334	0.783487	0.610959	0.986584
SAOUHSC_01263	14	rny/cvfA	NA	Q2FZ08	CBSS-257314.1.peg.676 / Ribonuclease Y	Ribonuclease Y (RNase Y) (EC 3.1.-.-) (Conserved virulence factor A)	mRNA catabolic process [GO:0006402]; pathogenesis [GO:0009405]	K18682;	-0.01	0.19	0.04	0.36	0.01	-0.03	-0.14	0.43	0.30126	0.0210788	0.00188667	0.999334	0.33811	0.529185	0.979773
SAOUHSC_01264	6	-	NA	Q2FZ07	FIG01107999: hypothetical protein	Uncharacterized protein			0.04	-0.93	-1.08	-0.51	-0.04	-0.49	-0.56	-0.68	0.583793	0.0178396	0.0883991	0.999334	0.606837	0.712464	0.977138
SAOUHSC_01265	11	-	NA	Q2FZ06	CBSS-257314.1.peg.676 / Uncharacterized protein YmdB	Uncharacterized protein		K09769;	0.03	0.35	0.26	-0.25	-0.03	0.4	-0.08	-0.57	0.292391	0.00453134	0.00100772	0.999334	0.95846	0.349634	0.8542
SAOUHSC_01266	5	-	NA	Q2FZ05	Carbohydrates / Central carbohydrate metabolism / TCA Cycle / 2-oxoglutarate oxidoreductase, alpha subunit (EC 1.2.7.3)	Uncharacterized protein	response to oxidative stress [GO:0006979]	K00174;	0.01	-0.07	-0.18	-0.52	-0.01	-0.2	-0.23	-0.21	0.499266	0.26323	0.891237	0.999334	0.967533	0.895213	0.621228
SAOUHSC_01267	6	-	NA	Q2FZ04	Carbohydrates / Central carbohydrate metabolism / TCA Cycle / 2-oxoglutarate oxidoreductase, beta subunit (EC 1.2.7.3)	Uncharacterized protein		K00175;	-0.03	-0.33	-0.31	-1.08	0.03	-0.34	-0.43	-0.55	0.121484	0.000155089	0.00943055	0.999334	0.731373	0.688212	0.320408
SAOUHSC_01268	2	-	NA	Q2FZ03	FIG01108320: hypothetical protein	Uncharacterized protein			-0.11	-0.11	1.42	3	0.11	-0.24	2.17	2.32	0.435988	0.000743626	0.000369813	0.999334	0.924311	0.701229	0.775849
SAOUHSC_01269	11	miaB	NA	Q2FZ02	Protein Metabolism / Protein processing and modification / Ribosomal protein S12p Asp methylthiotransferase / tRNA-i(6)A37 methylthiotransferase; RNA Metabolism / RNA processing and modification / Methylthiotransferases / tRNA-i(6)A37 methylthiotransferase; RNA Metabolism / RNA processing and modification / tRNA modification Archaea / tRNA-i(6)A37 methylthiotransferase; RNA Metabolism / RNA proce…	tRNA-2-methylthio-N(6)-dimethylallyladenosine synthase (EC 2.8.4.3) ((Dimethylallyl)adenosine tRNA methylthiotransferase MiaB) (tRNA-i(6)A37 methylthiotransferase)	tRNA modification [GO:0006400]	K06168;	0.01	-0.14	-1.41	-0.22	-0.01	-0.15	-1.5	-0.89	0.3338	0.000108088	0.00192257	0.999334	0.990596	0.895213	0.398723
SAOUHSC_01272	9	mutS	NA	Q2FYZ9	DNA Metabolism / DNA repair / DNA repair, bacterial MutL-MutS system / DNA mismatch repair protein MutS	DNA mismatch repair protein MutS	mismatch repair [GO:0006298]	K03555;	-0.12	0.38	-0.05	0.28	0.12	0.15	0.29	0.33	0.713318	0.305646	0.85377	0.999334	0.614206	0.992154	0.889158
SAOUHSC_01273	4	mutL	NA	Q93T05	DNA Metabolism / DNA repair / DNA repair, bacterial MutL-MutS system / DNA mismatch repair protein MutL	DNA mismatch repair protein MutL	mismatch repair [GO:0006298]	K03572;	0.11	0.42	-0.23	0.62	-0.11	0.32	0.15	0.78	0.265772	0.124431	0.00581373	0.999334	0.89488	0.229553	0.588114
SAOUHSC_01274	3	glpP	NA	Q2FYZ7	Glycerol-3-phosphate responsive antiterminator (mRNA-binding)	Glycerol uptake operon antiterminator regulatory protein	glycerol metabolic process [GO:0006071]; regulation of transcription, DNA-templated [GO:0006355]; response to biotic stimulus [GO:0009607]; transcription, DNA-templated [GO:0006351]	K02443;	0.08	0.1	0.18	0.58	-0.08	-0.09	0.42	0.27	0.354209	0.203021	0.099452	0.999334	0.895698	0.475733	0.924306
SAOUHSC_01276	16	glpK	NA	Q2FYZ5	Carbohydrates / Central carbohydrate metabolism / Dihydroxyacetone kinases / Glycerol kinase (EC 2.7.1.30); Carbohydrates / Sugar alcohols / Glycerol and Glycerol-3-phosphate Uptake and Utilization / Glycerol kinase (EC 2.7.1.30); Fatty Acids, Lipids, and Isoprenoids / Phospholipids / Glycerolipid and Glycerophospholipid Metabolism in Bacteria / Glycerol kinase (EC 2.7.1.30)	Glycerol kinase (EC 2.7.1.30) (ATP:glycerol 3-phosphotransferase) (Glycerokinase) (GK)	glycerol-3-phosphate metabolic process [GO:0006072]; glycerol catabolic process [GO:0019563]; glycerol metabolic process [GO:0006071]	K00864;	0.02	0.41	0.45	0.48	-0.02	-0.1	0.31	0.38	0.123838	0.00536249	0.00377184	0.999334	0.103499	0.969649	0.910615
SAOUHSC_01278	19	glpD	NA	Q2FYZ4	Carbohydrates / Sugar alcohols / Glycerol and Glycerol-3-phosphate Uptake and Utilization / Aerobic glycerol-3-phosphate dehydrogenase (EC 1.1.5.3); Fatty Acids, Lipids, and Isoprenoids / Phospholipids / Glycerolipid and Glycerophospholipid Metabolism in Bacteria / Aerobic glycerol-3-phosphate dehydrogenase (EC 1.1.5.3); Respiration / Electron donating reactions / Respiratory dehydrogenases 1 / A…	Aerobic glycerol-3-phosphate dehydrogenase (EC 1.1.5.3)	glycerol-3-phosphate metabolic process [GO:0006072]; glycerol catabolic process [GO:0019563]	K00111;	-0.03	0.52	0.47	0.7	0.03	0.4	0.31	0.57	0.582701	0.00202913	0.00651272	0.999334	0.438663	0.799074	0.704953
SAOUHSC_01280	2	miaA	NA	Q2FYZ2	RNA Metabolism / RNA processing and modification / tRNA processing / tRNA dimethylallyltransferase (EC 2.5.1.75)	tRNA dimethylallyltransferase (EC 2.5.1.75) (Dimethylallyl diphosphate:tRNA dimethylallyltransferase) (DMAPP:tRNA dimethylallyltransferase) (DMATase) (Isopentenyl-diphosphate:tRNA isopentenyltransferase) (IPP transferase) (IPPT) (IPTase)	tRNA modification [GO:0006400]	K00791;	-1.6	0.22	1.69	2.11	1.6	0.12	0.56	1.21	0.470584	0.242958	0.608778	0.999334	0.990596	0.495856	0.738814
SAOUHSC_01282	3	bsaA	NA	Q2FYZ0	Stress Response / Oxidative stress / Glutathione: Redox cycle / Glutathione peroxidase (EC 1.11.1.9); Glutathione: Redox cycle / Thioredoxin peroxidase (EC 1.11.1.15)	Glutathione peroxidase	response to oxidative stress [GO:0006979]	K00432;	-0.06	-0.02	0.27	0.88	0.06	-0.06	0.54	0.85	0.672067	0.0150363	0.00246571	0.999334	0.65405	0.940613	0.903706
SAOUHSC_01283	5	-	NA	Q2FYY9	Hfl operon / Ribosome LSU-associated GTP-binding protein HflX; Universal GTPases / Ribosome LSU-associated GTP-binding protein HflX	GTPase HflX (GTP-binding protein HflX)		K03665;	0.07	0.18	0.02	0.23	-0.07	0.19	-1.03	-0.69	0.491215	0.358406	0.212032	0.999334	0.846069	0.763593	0.756441
SAOUHSC_01284	6	-	NA	Q2FYY8	Aluminum resistance protein	Uncharacterized protein			-0.07	-0.04	-0.08	-0.08	0.07	-0.18	-0.13	-0.4	0.194116	0.640942	0.0310716	0.999334	0.31612	0.77336	0.235019
SAOUHSC_01287	18	glnA	CodY	Q2FYY6	Amino Acids and Derivatives / Glutamine, glutamate, aspartate, asparagine; ammonia assimilation / Glutamine synthetases / Glutamine synthetase type I (EC 6.3.1.2); Amino Acids and Derivatives / Glutamine, glutamate, aspartate, asparagine; ammonia assimilation / Glutamine, Glutamate, Aspartate and Asparagine Biosynthesis / Glutamine synthetase type I (EC 6.3.1.2); Cell Wall and Capsule / Cell Wall…	Glutamine synthetase (EC 6.3.1.2)	glutamine biosynthetic process [GO:0006542]; nitrogen fixation [GO:0009399]	K01915;	-0.08	-1.07	-0.58	-0.38	0.08	-0.75	-0.51	-0.43	0.186063	0.000998521	0.000197917	0.999334	0.342106	0.92818	0.738814
SAOUHSC_01310	6	cls1	NA	Q2FYW4	Fatty Acids, Lipids, and Isoprenoids / Phospholipids / Glycerolipid and Glycerophospholipid Metabolism in Bacteria / Cardiolipin synthetase (EC 2.7.8.-)	Cardiolipin synthase (CL synthase) (EC 2.7.8.-)	cardiolipin biosynthetic process [GO:0032049]	K06131;	-0.03	-0.37	-0.25	-0.21	0.03	0.07	-0.04	-0.88	0.165423	0.288869	0.00130803	0.999334	0.252136	0.614922	0.889158
SAOUHSC_01317	7	-	NA	Q2FYV7	FIG01108654: hypothetical protein	Uncharacterized protein			-0.03	-0.14	-0.59	0.96	0.03	-0.66	-0.39	1.2	0.811524	0.0346948	0.00032985	0.999334	0.719228	0.850847	0.998681
SAOUHSC_01320	12	hom	CodY	Q2FYV4	Amino Acids and Derivatives / Lysine, threonine, methionine, and cysteine / Methionine Biosynthesis / Homoserine dehydrogenase (EC 1.1.1.3); Amino Acids and Derivatives / Lysine, threonine, methionine, and cysteine / Threonine and Homoserine Biosynthesis / Homoserine dehydrogenase (EC 1.1.1.3)	Homoserine dehydrogenase (EC 1.1.1.3)	isoleucine biosynthetic process [GO:0009097]; methionine biosynthetic process [GO:0009086]; threonine biosynthetic process [GO:0009088]	K00003;	-0.01	-0.54	1.01	1.7	0.01	-0.24	0.81	1.57	0.148594	1.3e-06	4.07e-06	0.999334	0.28348	0.715855	0.938848
SAOUHSC_01321	9	thrC	CodY	Q2FYV3	Amino Acids and Derivatives / Lysine, threonine, methionine, and cysteine / Threonine and Homoserine Biosynthesis / Threonine synthase (EC 4.2.3.1)	Threonine synthase (EC 4.2.3.1)	threonine biosynthetic process [GO:0009088]	K01733;	0.03	-0.52	1.2	2.02	-0.03	-0.04	1	1.95	0.0148394	5.67e-06	7.3e-08	0.999334	0.0218344	0.971595	0.931932
SAOUHSC_01323	6	-	CodY	Q2FYV1	Hydrolase (HAD superfamily)	Uncharacterized protein			0.02	-0.04	0.06	0.35	-0.02	0.06	0.03	0.5	0.838967	0.0157004	0.00178683	0.999334	0.937071	0.883211	0.931932
SAOUHSC_01324	5	-	NA	Q2FYV0	FIG01108419: hypothetical protein	Uncharacterized protein			-0.06	-0.14	0.45	0.67	0.06	-0.19	0.6	0.99	0.908015	0.00332779	0.000555249	0.999334	0.944311	0.847954	0.979773
SAOUHSC_01327	19	katA	CodY , PerR	Q2FYU7	Oxidative stress / Catalase KatE (EC 1.11.1.6); Protection from Reactive Oxygen Species / Catalase KatE (EC 1.11.1.6)	Catalase (EC 1.11.1.6)	hydrogen peroxide catabolic process [GO:0042744]; response to hydrogen peroxide [GO:0042542]	K03781;	-0.02	-1.72	0.57	0.33	0.02	-1.05	0.88	0.45	0.148594	0.000772171	0.000210586	0.999334	0.122895	0.912458	0.977138
SAOUHSC_01330	12	guaC	NA	Q2FYU4	Nucleosides and Nucleotides / Purines / Purine conversions / GMP reductase (EC 1.7.1.7)	GMP reductase (EC 1.7.1.7) (Guanosine 5'-monophosphate oxidoreductase) (Guanosine monophosphate reductase)	purine nucleotide metabolic process [GO:0006163]	K00364;	0	0.29	-0.46	-0.38	0	0.12	-0.31	-0.37	0.511989	0.00812457	0.00262232	0.999334	0.990596	0.502526	0.819046
SAOUHSC_01333	2	lexA	NA	Q2FYU1	DNA Metabolism / DNA repair / DNA repair, bacterial UmuCD system / SOS-response repressor and protease LexA (EC 3.4.21.88); DNA Metabolism / DNA repair / DNA repair, bacterial / SOS-response repressor and protease LexA (EC 3.4.21.88)	LexA repressor (EC 3.4.21.88)	DNA repair [GO:0006281]; DNA replication [GO:0006260]; negative regulation of transcription, DNA-templated [GO:0045892]; SOS response [GO:0009432]; transcription, DNA-templated [GO:0006351]	K01356;	-0.02	-0.07	0.11	0.11	0.02	0.07	0.13	-0.82	0.0005134	0.176152	6.12e-05	0.999334	0.606855	0.993574	0.000586119
SAOUHSC_01336	5	-	NA	Q2FYT9	FIG01108406: hypothetical protein	UPF0291 protein SAOUHSC_01336			-0.01	0.14	-0.03	-0.56	0.01	0.23	-0.16	0.02	0.385696	0.382358	0.0428687	0.999334	0.722084	0.8253	0.621228
SAOUHSC_01337	33	tkt	NA	Q2FYT8	Carbohydrates / Central carbohydrate metabolism / Pentose phosphate pathway / Transketolase (EC 2.2.1.1)	Transketolase (EC 2.2.1.1)	metabolic process [GO:0008152]	K00615;	-0.02	-0.15	-0.11	0.63	0.02	0.1	0.03	0.69	0.531594	0.00599107	2.72e-05	0.999334	0.531587	0.983471	0.970543
SAOUHSC_01338	5	-	NA	Q2FYT7	UPF0154 protein YneF	UPF0154 protein SAOUHSC_01338		K09976;	-0.1	0.55	0.42	0.29	0.1	0.4	-0.12	0.35	0.148594	0.0753275	0.0069055	0.999334	0.345573	0.229553	0.979215
SAOUHSC_01341	2	sbcD	NA	Q2FYT4	DNA Metabolism / DNA repair / DNA repair, bacterial / Exonuclease SbcD	Nuclease SbcCD subunit D	DNA recombination [GO:0006310]; DNA repair [GO:0006281]; DNA replication [GO:0006260]; SOS response [GO:0009432]	K03547;	-0.03	0.3	-0.1	-0.25	0.03	0.02	-1.16	0.13	0.121484	0.379169	0.00930634	0.999334	0.910474	0.281801	0.741125
SAOUHSC_01343	6	sbcC	NA	Q2FYT2	DNA Metabolism / DNA repair / DNA repair, bacterial / Exonuclease SbcC	Uncharacterized protein			-0.04	0.11	0.06	0.14	0.04	-0.05	-0.97	-0.81	0.039906	0.147752	0.00471895	0.999334	0.910797	0.0464761	0.286373
SAOUHSC_01346	4	opuD1	NA	Q2FYT0	Stress Response / Osmotic stress / Choline and Betaine Uptake and Betaine Biosynthesis / Glycine betaine transporter OpuD	Glycine betaine transporter, putative	nitrogen compound transport [GO:0071705]	K05020;	-0.13	-0.24	-0.72	-0.22	0.13	0.16	-0.66	-0.67	0.367556	0.250882	0.00294303	0.999334	0.693928	0.942837	0.658988
SAOUHSC_01347	29	citB	Fur	Q2FYS9	Carbohydrates / Central carbohydrate metabolism / TCA Cycle / Aconitate hydratase (EC 4.2.1.3); Carbohydrates / One-carbon Metabolism / Serine-glyoxylate cycle / Aconitate hydratase (EC 4.2.1.3); Respiration / Respiration - no subcategory / Biogenesis of c-type cytochromes / Aconitate hydratase (EC 4.2.1.3)	Aconitate hydratase (Aconitase) (EC 4.2.1.3)	metabolic process [GO:0008152]	K01681;	0.04	-0.75	-0.13	-0.38	-0.04	-0.52	-0.09	-0.47	0.133733	0.00149039	0.000464441	0.999334	0.119151	0.772389	0.997378
SAOUHSC_01348	3	-	NA	Q2FYS8	4-hydroxybenzoyl-CoA thioesterase family active site	Uncharacterized protein		K07107;	-0.09	-0.05	-0.07	0.34	0.09	0.11	0.16	0.46	0.629779	0.0133938	0.0840482	0.999334	0.477284	0.754354	0.934847
SAOUHSC_01349	3	-	NA	Q2FYS7	FIG01108262: hypothetical protein	Uncharacterized protein SAOUHSC_01349			0.03	-0.41	-0.35	0.83	-0.03	-0.2	-0.04	0.79	0.207372	0.000423382	4.94e-06	0.999334	0.477284	0.326733	0.931932
SAOUHSC_01351	18	parE	NA	Q2FYS5	DNA Metabolism / DNA replication / DNA topoisomerases, Type II, ATP-dependent / DNA gyrase subunit B (EC 5.99.1.3); Virulence, Disease and Defense / Resistance to antibiotics and toxic compounds / Resistance to fluoroquinolones / DNA gyrase subunit B (EC 5.99.1.3)	DNA topoisomerase 4 subunit B (EC 5.99.1.3) (Topoisomerase IV subunit B)	chromosome segregation [GO:0007059]; DNA topological change [GO:0006265]	K02622;	0.06	0.12	-0.15	-0.55	-0.06	0.01	-0.27	-0.68	0.975429	0.00185579	4.3e-05	0.999334	0.993555	0.922089	0.924306
SAOUHSC_01352	16	parC	NA	Q2FYS4	DNA Metabolism / DNA replication / DNA topoisomerases, Type II, ATP-dependent / Topoisomerase IV subunit A (EC 5.99.1.-); Virulence, Disease and Defense / Resistance to antibiotics and toxic compounds / Resistance to fluoroquinolones / Topoisomerase IV subunit A (EC 5.99.1.-)	DNA topoisomerase 4 subunit A (EC 5.99.1.3) (Topoisomerase IV subunit A)	DNA topological change [GO:0006265]; response to antibiotic [GO:0046677]	K02621;	0.04	0.27	-0.03	-0.29	-0.04	0.08	-0.2	-0.31	0.684231	0.0374717	0.0060673	0.999334	0.620888	0.709313	0.987719
SAOUHSC_01354	2	alsT	NA	Q2G2N5	Sodium:alanine symporter family protein	Sodium:alanine symporter family protein, putative		K03310;	-1.31	1.69	1.23	0.71	1.31	2.01	-0.02	-0.75	0.0852471	0.0969962	0.0047701	0.506945	0.585628	0.0747163	0.23812
SAOUHSC_01359	3	fmtC	NA	Q2G2M2	Regulation and Cell signaling / Regulation and Cell signaling - no subcategory / Cell envelope-associated LytR-CpsA-Psr transcriptional attenuators / FmtC (MrpF) protein involved in methicillin resistance; Cell envelope-associated LytR-CpsA-Psr transcriptional attenuators / L-O-lysylphosphatidylglycerol synthase (EC 2.3.2.3)	Phosphatidylglycerol lysyltransferase (EC 2.3.2.3) (Lysylphosphatidylglycerol synthase) (LPG synthase) (Multiple peptide resistance factor)	lipid metabolic process [GO:0006629]; pathogenesis [GO:0009405]; response to antibiotic [GO:0046677]	K14205;	-0.02	0.13	0.18	0.38	0.02	0.51	-3.17	-2.11	0.345946	0.126897	0.162341	0.999334	0.990596	0.558732	0.437044
SAOUHSC_01360	3	msrA2	x	P0A084	Peptide methionine sulfoxide reductase / Peptide-methionine (S)-S-oxide reductase MsrA (EC 1.8.4.11)	Peptide methionine sulfoxide reductase MsrA 1 (Protein-methionine-S-oxide reductase 1) (EC 1.8.4.11) (Peptide-methionine (S)-S-oxide reductase 1) (Peptide Met(O) reductase 1)		K07304;	-0.01	-0.09	-0.13	0.18	0.01	-0.08	-0.17	0.2	0.483271	0.51465	0.100497	0.999334	0.819131	0.883211	0.657427
SAOUHSC_01361	5	msrR	NA	Q7BHL7	Regulation and Cell signaling / Regulation and Cell signaling - no subcategory / Cell envelope-associated LytR-CpsA-Psr transcriptional attenuators / Peptide methionine sulfoxide reductase regulator MsrR	Regulatory protein MsrR	regulation of transcription, DNA-templated [GO:0006355]; transcription, DNA-templated [GO:0006351]		0.1	-0.13	-0.57	0.4	-0.1	-0.17	-0.73	0.02	0.732046	0.00416053	0.0141398	0.999334	0.7828	0.971036	0.910615
SAOUHSC_01362	2	dmpI	NA	Q2G2M0	Probable diacid tautomerase of unidentified natural substrate YwhB	Tautomerase (EC 5.3.2.-)	cellular aromatic compound metabolic process [GO:0006725]	K01821;	1.9	-2.05	1.35	2.06	-1.9	-1.68	1.67	0.73	0.000980214	0.00143321	1.29e-05	5.25e-05	0.000825584	0.00128273	0.045931
SAOUHSC_01373	12	femA	NA	Q2FYR2	Cell Wall and Capsule / Cell Wall and Capsule - no subcategory / tRNA-dependent amino acid transfers / tRNA-dependent lipid II-Gly--glycine ligase; Cell Wall and Capsule / Cell Wall and Capsule - no subcategory / tRNA-dependent amino acid transfers / tRNA-dependent lipid II-GlyGly--glycine ligase; tRNA-dependent amino acid transfers / FemA, factor essential for methicillin resistance	Aminoacyltransferase FemA (EC 2.3.2.17) (Factor essential for expression of methicillin resistance A) (N-acetylmuramoyl-L-alanyl-D-glutamyl-L-lysyl-(N6-glycyl)-D-alanyl-D-alanine-diphosphoundecaprenyl-N-acetylglucosamine:glycine glycyltransferase)	cell wall organization [GO:0071555]; peptidoglycan biosynthetic process [GO:0009252]; regulation of cell shape [GO:0008360]; response to antibiotic [GO:0046677]	K11694;	-0.08	0.03	-0.21	-0.13	0.08	-0.08	-0.24	-0.35	0.407498	0.374656	0.0144611	0.999334	0.41774	0.688212	0.385622
SAOUHSC_01374	14	femB	NA	Q2FYR1	tRNA-dependent amino acid transfers / FemB, factor involved in methicillin resistance; tRNA-dependent amino acid transfers / tRNA-dependent lipid II-GlyGlyGly glycyltransferase (EC 2.3.2.18); tRNA-dependent amino acid transfers / tRNA-dependent lipid II-GlyGlyGlyGly glycyltransferase (EC 2.3.2.18)	Aminoacyltransferase FemB (EC 2.3.2.18) (Factor essential for expression of methicillin resistance B) (N-acetylmuramoyl-L-alanyl-D-glutamyl-L-lysyl-(N6-triglycine)-D-alanyl-D-alanine-diphosphoundecaprenyl-N-acetylglucosamine:glycine glycyltransferase)	cell wall organization [GO:0071555]; peptidoglycan biosynthetic process [GO:0009252]; regulation of cell shape [GO:0008360]; response to antibiotic [GO:0046677]	K11695;	0.05	-0.17	-0.09	-0.04	-0.05	-0.07	-0.15	-0.21	0.5135	0.34543	0.565856	0.999334	0.47257	0.995965	0.992907
SAOUHSC_01376	3	-	NA	Q2FYQ9	FIG01108123: hypothetical protein	Uncharacterized protein			0.06	0.06	0.3	0.44	-0.06	0.25	-0.04	0.34	0.579808	0.1623	0.249187	0.999334	0.953248	0.605778	0.997385
SAOUHSC_01383	11	-	NA	Q2FYQ2	Oligoendopeptidase F (EC 3.4.24.-)	Uncharacterized protein	signal peptide processing [GO:0006465]		-0.06	-0.13	-0.17	0.84	0.06	0.16	-0.08	0.8	0.524557	0.00151994	0.000484932	0.999334	0.644133	0.820551	0.975938
SAOUHSC_01389	4	pstS	NA	Q2FYP6	Phosphorus Metabolism / Phosphorus Metabolism - no subcategory / High affinity phosphate transporter and control of PHO regulon / Phosphate ABC transporter, periplasmic phosphate-binding protein PstS (TC 3.A.1.7.1); Phosphorus Metabolism / Phosphorus Metabolism - no subcategory / Phosphate metabolism / Phosphate ABC transporter, periplasmic phosphate-binding protein PstS (TC 3.A.1.7.1)	Phosphate-binding protein PstS (PBP)	phosphate ion transport [GO:0006817]	K02040;	1.21	1.44	5.09	4.96	-1.21	2.12	5.57	6.79	0.112648	0.000386981	0.000336942	0.520751	0.122895	0.292025	0.167392
SAOUHSC_01391	7	cvfB	NA	Q2FYP3	S1 RNA binding domain	Conserved virulence factor B	pathogenesis [GO:0009405]	K00243;	0.04	0.13	0.04	-0.1	-0.04	0.15	0.03	-0.04	0.636374	0.310115	0.157553	0.999334	0.719986	0.926683	0.801035
SAOUHSC_01392	20	-	NA	Q2FYP2	CBSS-393121.3.peg.2760 / ABC transporter ATP-binding protein uup	ABC transporter, ATP-binding protein, putative			-0.02	0.13	-0.07	-0.39	0.02	-0.02	-0.09	-0.52	0.521858	0.00755402	0.00057492	0.999334	0.374406	0.857601	0.801035
SAOUHSC_01394	2	lysC	NA	Q2FYP1	Amino Acids and Derivatives / Lysine, threonine, methionine, and cysteine / Lysine Biosynthesis DAP Pathway / Aspartokinase (EC 2.7.2.4); Amino Acids and Derivatives / Lysine, threonine, methionine, and cysteine / Threonine and Homoserine Biosynthesis / Aspartokinase (EC 2.7.2.4)	Aspartokinase (EC 2.7.2.4)	lysine biosynthetic process via diaminopimelate [GO:0009089]; threonine biosynthetic process [GO:0009088]	K00928;	-0.12	-0.45	6.47	6.11	0.12	0.38	6.42	6.02	0.975429	1.43e-06	2.34e-07	0.999334	0.990596	0.926683	0.970543
SAOUHSC_01395	11	asd	CodY	Q2FYP0	Amino Acids and Derivatives / Lysine, threonine, methionine, and cysteine / Lysine Biosynthesis DAP Pathway / Aspartate-semialdehyde dehydrogenase (EC 1.2.1.11); Amino Acids and Derivatives / Lysine, threonine, methionine, and cysteine / Threonine and Homoserine Biosynthesis / Aspartate-semialdehyde dehydrogenase (EC 1.2.1.11)	Aspartate-semialdehyde dehydrogenase (ASA dehydrogenase) (ASADH) (EC 1.2.1.11) (Aspartate-beta-semialdehyde dehydrogenase)	'de novo' L-methionine biosynthetic process [GO:0071266]; diaminopimelate biosynthetic process [GO:0019877]; isoleucine biosynthetic process [GO:0009097]; lysine biosynthetic process via diaminopimelate [GO:0009089]; threonine biosynthetic process [GO:0009088]	K00133;	0.06	-0.89	3.53	3.99	-0.06	0.07	3.43	3.92	0.012974	8.77e-08	2.62e-09	0.999334	0.0103717	0.940613	0.978326
SAOUHSC_01396	14	dapA	CodY	Q9EZ12	Amino Acids and Derivatives / Lysine, threonine, methionine, and cysteine / Lysine Biosynthesis DAP Pathway / 4-hydroxy-tetrahydrodipicolinate synthase (EC 4.3.3.7)	4-hydroxy-tetrahydrodipicolinate synthase (HTPA synthase) (EC 4.3.3.7)	diaminopimelate biosynthetic process [GO:0019877]; lysine biosynthetic process via diaminopimelate [GO:0009089]	K01714;	0.01	-0.06	3.65	4.13	-0.01	0.04	3.47	3.9	0.662724	1.43e-06	1.37e-08	0.999334	0.517793	0.861747	0.967193
SAOUHSC_01397	6	dapB	CodY	Q9EZ11	Amino Acids and Derivatives / Lysine, threonine, methionine, and cysteine / Lysine Biosynthesis DAP Pathway / 4-hydroxy-tetrahydrodipicolinate reductase (EC 1.17.1.8)	4-hydroxy-tetrahydrodipicolinate reductase (HTPA reductase) (EC 1.17.1.8)	diaminopimelate biosynthetic process [GO:0019877]; lysine biosynthetic process via diaminopimelate [GO:0009089]	K00215;	0.12	-0.24	4.1	4.36	-0.12	0.21	4	4.08	0.284344	5.17e-05	1.38e-08	0.999334	0.362795	0.993574	0.900145
SAOUHSC_01398	5	dapD	CodY	Q2FYN7	Amino Acids and Derivatives / Lysine, threonine, methionine, and cysteine / Lysine Biosynthesis DAP Pathway / 2,3,4,5-tetrahydropyridine-2,6-dicarboxylate N-acetyltransferase (EC 2.3.1.89)	2,3,4,5-tetrahydropyridine-2,6-dicarboxylate N-acetyltransferase (EC 2.3.1.89) (Tetrahydrodipicolinate N-acetyltransferase) (THP acetyltransferase) (Tetrahydropicolinate acetylase)	diaminopimelate biosynthetic process [GO:0019877]; lysine biosynthetic process via diaminopimelate [GO:0009089]	K05822;	-0.04	-1.06	3.62	4.2	0.04	-0.27	3.72	4.29	0.012974	1.4e-06	3.03e-10	0.999334	0.00623327	0.730036	0.850383
SAOUHSC_01399	5	-	CodY	Q2FYN6	Amino Acids and Derivatives / Lysine, threonine, methionine, and cysteine / Lysine Biosynthesis DAP Pathway / N-acetyl-L,L-diaminopimelate deacetylase (EC 3.5.1.47)	Uncharacterized hydrolase SAOUHSC_01399 (EC 3.-.-.-)	metabolic process [GO:0008152]		-0.55	-0.2	2.86	3.47	0.55	0.82	2.71	3.59	0.0535345	1.6e-05	4.15e-06	0.0851405	0.987422	0.113087	0.294063
SAOUHSC_01400	3	alr2	CodY	Q9EZ08	Amino Acids and Derivatives / Lysine, threonine, methionine, and cysteine / Lysine Biosynthesis DAP Pathway / Diaminopimelate epimerase alternative form predicted for S.aureus (EC 5.1.1.7)	Alanine racemase 2 (EC 5.1.1.1)	D-alanine biosynthetic process [GO:0030632]	K01775;	-0.17	0.95	3.87	5.05	0.17	0.86	2.75	4.27	0.745088	0.00100332	0.0526923	0.999334	0.990596	0.77336	0.81846
SAOUHSC_01401	13	lysA	CodY	Q2FYN4	Amino Acids and Derivatives / Lysine, threonine, methionine, and cysteine / Lysine Biosynthesis DAP Pathway / Diaminopimelate decarboxylase (EC 4.1.1.20)	Diaminopimelate decarboxylase (DAP decarboxylase) (DAPDC) (EC 4.1.1.20)	lysine biosynthetic process via diaminopimelate [GO:0009089]	K01586;	-0.01	-0.59	0.42	0.93	0.01	-0.16	0.47	1.16	0.186063	0.000373246	1.32e-05	0.999334	0.119993	0.850847	0.704953
SAOUHSC_01403	5	cspA	NA	Q2FYN2	Cold shock, CspA family of proteins / Cold shock protein of CSP family => CspA (naming convention as in S.aureus)	Cold shock protein CspA	regulation of transcription, DNA-templated [GO:0006355]	K03704;	0.01	0.12	-0.4	-1.12	-0.01	-0.13	0.05	-1.37	0.402342	0.144812	0.000528734	0.999334	0.662796	0.529944	0.903706
SAOUHSC_01405	2	-	NA	Q2FYN0	FIG01108332: hypothetical protein	Uncharacterized protein			-0.08	-0.15	-0.63	-0.28	0.08	-0.05	-2.29	-2.36	0.234302	0.208438	0.00812791	0.999334	0.991136	0.758958	0.293534
SAOUHSC_01408	13	-	NA	Q2FYM7	Uncharacterized protein YaaN	TelA-like protein SAOUHSC_01408			0.02	-0.21	-0.08	0.51	-0.02	-0.12	0.05	0.64	0.81586	0.000910934	0.00437632	0.999334	0.713703	0.711189	0.910615
SAOUHSC_01412	6	-	NA	Q2G2J9	Stress Response / Stress Response - no subcategory / Flavohaemoglobin / Nitric oxide reductase activation protein NorD	Uncharacterized protein			0.04	-0.35	-0.36	-0.32	-0.04	-0.19	-0.65	0.02	0.29523	0.219903	0.0297276	0.999334	0.819131	0.529185	0.829264
SAOUHSC_01413	7	-	NA	Q2G2J8	Stress Response / Stress Response - no subcategory / Flavohaemoglobin / Nitric oxide reductase activation protein NorQ	Uncharacterized protein SAOUHSC_01413			-0.02	-0.09	-0.12	0.03	0.02	-0.16	-0.13	0.21	0.710384	0.513539	0.0575057	0.999334	0.990596	0.935553	0.801035
SAOUHSC_01414	5	-	NA	Q2G2J7	Uncharacterized protein YozC	Uncharacterized protein			0.05	0.04	-0.12	-0.44	-0.05	0.02	-0.04	-0.23	0.863579	0.301444	0.202295	0.999334	0.821111	0.935553	0.977138
SAOUHSC_01415	8	-	NA	Q2FYM3	FIG01107869: hypothetical protein	Uncharacterized protein			0.05	-0.03	0.21	0.26	-0.05	0.11	0.22	0.23	0.546649	0.0623357	0.230289	0.999334	0.40819	0.918743	0.939041
SAOUHSC_01416	11	sucB	NA	Q2FYM2	Carbohydrates / Central carbohydrate metabolism / Dehydrogenase complexes / Dihydrolipoamide succinyltransferase component (E2) of 2-oxoglutarate dehydrogenase complex (EC 2.3.1.61); Carbohydrates / Central carbohydrate metabolism / TCA Cycle / Dihydrolipoamide succinyltransferase component (E2) of 2-oxoglutarate dehydrogenase complex (EC 2.3.1.61); Cofactors, Vitamins, Prosthetic Groups, Pigment…	Dihydrolipoyllysine-residue succinyltransferase component of 2-oxoglutarate dehydrogenase complex (EC 2.3.1.61) (2-oxoglutarate dehydrogenase complex component E2) (OGDC-E2) (Dihydrolipoamide succinyltransferase component of 2-oxoglutarate dehydrogenase complex)	L-lysine catabolic process to acetyl-CoA via saccharopine [GO:0033512]; tricarboxylic acid cycle [GO:0006099]	K00658;	-0.16	-0.45	1.1	0.8	0.16	-0.03	1.25	1.23	0.528752	0.000391769	9.02e-05	0.999334	0.902363	0.744967	0.814789
SAOUHSC_01418	13	sucA	NA	Q2FYM1	Carbohydrates / Central carbohydrate metabolism / Dehydrogenase complexes / 2-oxoglutarate dehydrogenase E1 component (EC 1.2.4.2); Carbohydrates / Central carbohydrate metabolism / TCA Cycle / 2-oxoglutarate dehydrogenase E1 component (EC 1.2.4.2)	2-oxoglutarate dehydrogenase E1 component (EC 1.2.4.2) (Alpha-ketoglutarate dehydrogenase)	glycolytic process [GO:0006096]; tricarboxylic acid cycle [GO:0006099]	K00164;	-0.03	-0.22	1.11	0.8	0.03	-0.11	1.42	1.09	0.792437	0.00133245	5.04e-07	0.999334	0.767732	0.697072	0.801035
SAOUHSC_01420	3	arlR	Fur , SigB	Q9KJN4	Putative response regulator ArlR	Response regulator ArlR	pathogenesis [GO:0009405]; phosphorelay signal transduction system [GO:0000160]; regulation of transcription, DNA-templated [GO:0006355]; transcription, DNA-templated [GO:0006351]	K18941;	0.09	-0.31	1.17	1.94	-0.09	1.27	0.23	1.49	0.0479763	0.0187025	0.000196883	0.999334	0.144092	0.501741	0.95682
SAOUHSC_01424	12	murG	NA	Q2FYL5	Cell Wall and Capsule / Cell Wall and Capsule - no subcategory / Peptidoglycan Biosynthesis / UDP-N-acetylglucosamine--N-acetylmuramyl-(pentapeptide) pyrophosphoryl-undecaprenol N-acetylglucosamine transferase (EC 2.4.1.227); Cell Division Cluster / UDP-N-acetylglucosamine--N-acetylmuramyl-(pentapeptide) pyrophosphoryl-undecaprenol N-acetylglucosamine transferase (EC 2.4.1.227)	UDP-N-acetylglucosamine--N-acetylmuramyl-(pentapeptide) pyrophosphoryl-undecaprenol N-acetylglucosamine transferase (EC 2.4.1.227) (Undecaprenyl-PP-MurNAc-pentapeptide-UDPGlcNAc GlcNAc transferase)	carbohydrate metabolic process [GO:0005975]; cell cycle [GO:0007049]; cell division [GO:0051301]; cell wall organization [GO:0071555]; lipid glycosylation [GO:0030259]; peptidoglycan biosynthetic process [GO:0009252]; regulation of cell shape [GO:0008360]	K02563;	-0.04	-0.46	-0.23	-0.35	0.04	-0.44	-0.21	-0.53	0.495137	0.170701	0.00616843	0.999334	0.735074	0.979206	0.561697
SAOUHSC_01425	3	-	NA	Q2FYL4	Acetyltransferase, GNAT family	Uncharacterized protein			0.01	-0.45	-0.65	-0.57	-0.01	-0.65	-0.65	-1.42	0.29523	0.595942	0.00532461	0.999334	0.758836	0.947142	0.330441
SAOUHSC_01427	14	ctpA	NA	Q2FYL3	Carboxyl-terminal protease (EC 3.4.21.102)	Uncharacterized protein	signal transduction [GO:0007165]	K03797;	-0.03	-0.14	-0.16	1.14	0.03	0.03	-0.17	0.92	0.206244	0.000330493	0.000327158	0.999334	0.79888	0.97098	0.387243
SAOUHSC_01430	5	crr	NA	Q2FYL0	Carbohydrates / Di- and oligosaccharides / Trehalose Uptake and Utilization / PTS system, glucose-specific IIA component	Phosphotransferase system enzyme IIA, putative	phosphoenolpyruvate-dependent sugar phosphotransferase system [GO:0009401]	K02777;	0.01	0.11	0.51	1.91	-0.01	0.09	0.58	1.7	0.587735	6.24e-05	3.32e-07	0.999334	0.944311	0.699562	0.890796
SAOUHSC_01431	5	msrB	x	P0A088	Protein Metabolism / Protein processing and modification / Peptide methionine sulfoxide reductase / Peptide methionine sulfoxide reductase MsrB (EC 1.8.4.12)	Peptide methionine sulfoxide reductase MsrB (EC 1.8.4.12) (Peptide-methionine (R)-S-oxide reductase)	protein repair [GO:0030091]; response to oxidative stress [GO:0006979]	K07305;	-0.59	0.78	1.66	3.86	0.59	0.76	1.61	3.45	0.21255	0.000556861	0.000150176	0.999334	0.443579	0.211303	0.294063
SAOUHSC_01432	6	msrA1	x	P0A086	Protein Metabolism / Protein processing and modification / Peptide methionine sulfoxide reductase / Peptide methionine sulfoxide reductase MsrA (EC 1.8.4.11)	Peptide methionine sulfoxide reductase MsrA 2 (Protein-methionine-S-oxide reductase 2) (EC 1.8.4.11) (Peptide-methionine (S)-S-oxide reductase 2) (Peptide Met(O) reductase 2)		K07304;	-0.34	1.01	1.94	4.56	0.34	0.31	2.12	4.2	0.277459	5.17e-05	1.28e-06	0.999334	0.215451	0.912458	0.724917
SAOUHSC_01433	6	fakB2	NA	Q2FYK7	Hypothetical protein DUF194, DegV family	Uncharacterized protein			-0.04	-0.27	0.38	0.14	0.04	0.09	0.19	-0.02	0.361714	0.182718	0.382082	0.999334	0.33811	0.971036	0.970543
SAOUHSC_01435	5	thyA	NA	Q2FYK5	Cofactors, Vitamins, Prosthetic Groups, Pigments / Folate and pterines / Folate Biosynthesis / Thymidylate synthase (EC 2.1.1.45); Nucleosides and Nucleotides / Pyrimidines / pyrimidine conversions / Thymidylate synthase (EC 2.1.1.45)	Thymidylate synthase (TS) (TSase) (EC 2.1.1.45)	dTMP biosynthetic process [GO:0006231]; dTTP biosynthetic process [GO:0006235]	K00560;	0.06	-0.44	-0.15	-0.38	-0.06	-0.32	-0.11	-0.32	0.939654	0.304687	0.467171	0.999334	0.856432	0.894727	0.890796
SAOUHSC_01436	4	-	NA	Q2FYK4	UPF0403 membrane protein YphP/YqiW family	UPF0403 protein SAOUHSC_01436			-0.02	-0.07	-0.4	-0.19	0.02	-0.15	-0.17	-0.44	0.660826	0.378513	0.259832	0.999334	0.869034	0.990337	0.658988
SAOUHSC_01437	2	cvfC	NA	Q2FYK3	PBS lyase HEAT-like repeat domain protein	Conserved virulence factor C	pathogenesis [GO:0009405]		0.02	-1.68	-0.76	-0.43	-0.02	-0.33	-1.1	0.62	0.106783	0.0256748	0.00629475	0.999334	0.122895	0.836747	0.746225
SAOUHSC_01438	3	-	NA	Q2FYK2	FIG01108403: hypothetical protein	Uncharacterized protein			0.02	-0.09	-0.36	-0.77	-0.02	0.15	-0.53	-0.72	0.483044	0.116659	0.120622	0.999334	0.405247	0.996049	0.96176
SAOUHSC_01443	2	-	NA	Q2FYJ7	RNase H	Uncharacterized protein		K03469;	-0.02	-0.33	-1.43	0.11	0.02	-1.73	-0.33	0.19	0.324178	0.0212099	0.0118829	0.999334	0.58463	0.607462	0.997385
SAOUHSC_01451	6	ilvA1	CodY	Q2FYJ3	Amino Acids and Derivatives / Alanine, serine, and glycine / Glycine and Serine Utilization / Threonine dehydratase, catabolic (EC 4.3.1.19); Amino Acids and Derivatives / Branched-chain amino acids / Branched-Chain Amino Acid Biosynthesis / Threonine dehydratase, catabolic (EC 4.3.1.19); Amino Acids and Derivatives / Lysine, threonine, methionine, and cysteine / Threonine degradation / Threonine…	L-threonine dehydratase catabolic TdcB (EC 4.3.1.19) (Threonine deaminase)	L-threonine catabolic process to propionate [GO:0070689]	K01754;	0.34	0.75	0.8	3.37	-0.34	4.34	2.19	5.1	0.134038	0.00798211	0.000357652	0.999334	0.0924755	0.839432	0.526972
SAOUHSC_01452	5	ald1	Rex	Q2FYJ2	Carbohydrates / Central carbohydrate metabolism / Pyruvate Alanine Serine Interconversions / Alanine dehydrogenase (EC 1.4.1.1)	Alanine dehydrogenase 1 (EC 1.4.1.1)	L-alanine catabolic process [GO:0042853]	K00259;	-0.23	2.73	3.37	4.8	0.23	5.46	4.3	5.93	0.134038	0.00254274	7.49e-06	0.999334	0.0818495	0.772389	0.621228
SAOUHSC_01454	7	-	NA	Q2FYJ1	DNA Metabolism / DNA repair / DNA Repair Base Excision / DNA polymerase I (EC 2.7.7.7); DNA Metabolism / DNA replication / DNA-replication / DNA polymerase I (EC 2.7.7.7)	Uncharacterized protein	DNA replication, Okazaki fragment processing [GO:0033567]		0	0.01	-0.21	-0.7	0	0.18	-0.16	-0.53	0.675938	0.00241979	7.25e-05	0.999334	0.657698	0.699562	0.652469
SAOUHSC_01455	25	-	NA	Q2FYJ0	FIG01108718: hypothetical protein	Uncharacterized protein			-0.04	-0.48	-0.34	-0.31	0.04	-0.33	-0.79	-0.61	0.186804	0.0179176	0.0036845	0.999334	0.845605	0.345968	0.593458
SAOUHSC_01460	16	-	NA	Q2FYI6	Control of cell elongation - division cycle in Bacilli / 23S rRNA (guanine(2445)-N(2))-methyltransferase (EC 2.1.1.173)	Uncharacterized protein		K07444;	0.01	0.34	0.13	0.02	-0.01	0.06	0.08	-0.14	0.445329	0.042361	0.382082	0.999334	0.290949	0.697072	0.763701
SAOUHSC_01462	6	gpsB	NA	Q2FYI5	Cell Division and Cell Cycle / Cell Division and Cell Cycle - no subcategory / Control of cell elongation - division cycle in Bacilli / Cell division protein GpsB, coordinates the switch between cylindrical and septal cell wall synthesis by re-localization of PBP1	Cell cycle protein GpsB (Guiding PBP1-shuttling protein)	cell cycle [GO:0007049]; cell division [GO:0051301]; regulation of cell shape [GO:0008360]		-0.05	-0.37	-0.03	0.3	0.05	-0.11	0.02	0.42	0.434884	0.0312022	0.00154419	0.999334	0.657698	0.678048	0.992907
SAOUHSC_01464	2	-	NA	Q2FYI3	FIG01108162: hypothetical protein	Uncharacterized protein			0.06	0.07	-0.15	0.11	-0.06	0.23	-0.12	-0.15	0.599157	0.444422	0.110347	0.999334	0.990596	0.672023	0.799133
SAOUHSC_01467	27	pbp2	VraSR	Q2FYI0	Control of cell elongation - division cycle in Bacilli / Multimodular transpeptidase-transglycosylase (EC 2.4.1.129) (EC 3.4.-.-) / Penicillin-binding protein 1A/1B (PBP1); Peptidoglycan Biosynthesis / Multimodular transpeptidase-transglycosylase (EC 2.4.1.129) (EC 3.4.-.-) / Penicillin-binding protein 1A/1B (PBP1)	Penicillin-binding protein 2		K05366;	0.05	0.04	0.12	0.27	-0.05	-0.12	-0.01	0.28	0.507846	0.0986468	0.00121084	0.999334	0.548391	0.8728	0.910615
SAOUHSC_01471	10	asnC	NA	Q2FYH6	Protein Metabolism / Protein biosynthesis / tRNA aminoacylation, Glu and Gln / Asparaginyl-tRNA synthetase (EC 6.1.1.22); RNA Metabolism / RNA processing and modification / tRNA modification Archaea / Asparaginyl-tRNA synthetase (EC 6.1.1.22)	Asparagine--tRNA ligase (EC 6.1.1.22) (Asparaginyl-tRNA synthetase) (AsnRS)	asparaginyl-tRNA aminoacylation [GO:0006421]	K01893;	-0.04	0.01	-0.12	0.14	0.04	-0.02	-0.04	0.05	0.294898	0.0916669	0.642853	0.999334	0.374768	0.946462	0.401993
SAOUHSC_01472	18	dinG	NA	Q2FYH5	DNA Metabolism / DNA repair / DNA repair, bacterial DinG and relatives / DinG family ATP-dependent helicase YoaA	3'-5' exonuclease DinG (EC 3.1.-.-)	DNA replication proofreading [GO:0045004]	K03722;	0.02	0	-0.12	0.33	-0.02	-0.01	-0.39	0.21	0.553171	0.017823	0.0309883	0.999334	0.855431	0.67172	0.900145
SAOUHSC_01473	3	birA	NA	Q2G258	Biotin biosynthesis / Biotin-protein ligase (EC 6.3.4.15) / Biotin operon repressor	Bifunctional ligase/repressor BirA (Biotin--[acetyl-CoA-carboxylase] ligase) (EC 6.3.4.15) (Biotin--protein ligase) (Biotin-[acetyl-CoA carboxylase] synthetase)	protein biotinylation [GO:0009305]; regulation of transcription, DNA-templated [GO:0006355]; transcription, DNA-templated [GO:0006351]	K03524;	-0.01	0.5	0.69	0.7	0.01	0.84	-0.44	0.09	0.00263775	0.0381262	0.00188667	0.999334	0.359219	0.0387772	0.307826
SAOUHSC_01474	6	papS	NA	Q2G256	RNA Metabolism / RNA processing and modification / tRNA nucleotidyltransferase / tRNA nucleotidyltransferase (EC 2.7.7.21) (EC 2.7.7.25)	CCA-adding enzyme (EC 2.7.7.72)	RNA repair [GO:0042245]; tRNA 3'-terminal CCA addition [GO:0001680]	K00974;	0.05	0.26	-0.04	0.16	-0.05	0.13	-0.05	0.35	0.62538	0.365303	0.100218	0.999334	0.855431	0.758051	0.900145
SAOUHSC_01475	11	bshA	NA	Q2G255	Cell Wall and Capsule / Capsular and extracellular polysacchrides / Exopolysaccharide Biosynthesis / Glycosyl transferase, group 1 family protein	Uncharacterized protein	bacillithiol biosynthetic process [GO:0071793]	K00754;	-0.02	-0.08	-0.03	0.3	0.02	0.03	0.14	0.29	0.652911	0.065463	0.0295864	0.999334	0.98385	0.711189	0.903706
SAOUHSC_01476	2	-	NA	Q2G254	MazG nucleotide pyrophosphohydrolase	Uncharacterized protein			-0.08	-0.15	-0.04	-0.46	0.08	0.02	-0.1	0.41	0.360995	0.904381	0.0616275	0.999334	0.990596	0.61133	0.746225
SAOUHSC_01477	2	-	CodY	Q2G257	probable metal-dependent peptidase	Uncharacterized protein		K06973;	-0.01	-0.73	-2.84	0.77	0.01	-0.38	-1.91	0.26	0.738257	0.000373907	0.00039696	0.999334	0.990596	0.83835	0.889158
SAOUHSC_01480	5	-	CodY	Q2FYH2	CBSS-393130.3.peg.129 / TPR-repeat-containing protein, putative component of Menaquinone-cytochrome C reductase	Uncharacterized protein			-0.02	0.12	-0.04	-0.05	0.02	-0.05	-0.06	-0.24	0.609924	0.213669	0.467171	0.999334	0.538367	0.993574	0.889158
SAOUHSC_01481	11	aroA	CodY	Q05615	Chorismate Synthesis / 5-Enolpyruvylshikimate-3-phosphate synthase (EC 2.5.1.19) alpha sub-homology division; Common Pathway For Synthesis of Aromatic Compounds (DAHP synthase to chorismate) / 5-Enolpyruvylshikimate-3-phosphate synthase (EC 2.5.1.19) alpha sub-homology division	3-phosphoshikimate 1-carboxyvinyltransferase (EC 2.5.1.19) (5-enolpyruvylshikimate-3-phosphate synthase) (EPSP synthase) (EPSPS)	aromatic amino acid family biosynthetic process [GO:0009073]; chorismate biosynthetic process [GO:0009423]	K00800;	-0.03	-0.32	-0.35	-0.05	0.03	-0.23	-0.32	0.07	0.826644	0.0279441	0.0420549	0.999334	0.87429	0.894727	0.927378
SAOUHSC_01483	8	aroC	CodY	Q2FYG9	Amino Acids and Derivatives / Aromatic amino acids and derivatives / Chorismate Synthesis / Chorismate synthase (EC 4.2.3.5); Amino Acids and Derivatives / Aromatic amino acids and derivatives / Common Pathway For Synthesis of Aromatic Compounds (DAHP synthase to chorismate) / Chorismate synthase (EC 4.2.3.5)	Chorismate synthase (CS) (EC 4.2.3.5) (5-enolpyruvylshikimate-3-phosphate phospholyase)	aromatic amino acid family biosynthetic process [GO:0009073]; chorismate biosynthetic process [GO:0009423]	K01736;	0.06	-0.19	-0.27	0.12	-0.06	-0.17	0.07	0.08	0.506999	0.180166	0.288254	0.999334	0.914349	0.481633	0.977138
SAOUHSC_01487	4	ubiE	NA	Q2FYG5	Menaquinone and Phylloquinone Biosynthesis / 2-heptaprenyl-1,4-naphthoquinone methyltransferase (EC 2.1.1.163); Menaquinone and Phylloquinone Biosynthesis / 2-methoxy-6-polyprenyl-1,4-benzoquinol methylase (EC 2.1.1.201); Menaquinone biosynthesis from chorismate via 1,4-dihydroxy-2-naphthoate / 2-heptaprenyl-1,4-naphthoquinone methyltransferase (EC 2.1.1.163)	Menaquinone biosynthesis methyltransferase, putative (EC 2.1.1.-)		K03183;	0	-0.02	0.18	0.25	0	0.19	0.27	0.55	0.582701	0.224301	0.0042754	0.999334	0.614206	0.933476	0.618678
SAOUHSC_01488	3	-	NA	Q2FYG4	Fatty Acids, Lipids, and Isoprenoids / Isoprenoids / Isoprenoid scratch / Heptaprenyl diphosphate synthase component I (EC 2.5.1.30); Fatty Acids, Lipids, and Isoprenoids / Isoprenoids / Isoprenoinds for Quinones / Heptaprenyl diphosphate synthase component I (EC 2.5.1.30); Fatty Acids, Lipids, and Isoprenoids / Isoprenoids / Polyprenyl Diphosphate Biosynthesis / Heptaprenyl diphosphate synthase …	Uncharacterized protein	menaquinone biosynthetic process [GO:0009234]		-0.21	0.09	-0.34	0.03	0.21	-0.46	-0.16	0.16	0.198258	0.442417	0.0385333	0.999334	0.122895	0.794496	0.890796
SAOUHSC_01490	9	hup	NA	Q2FYG2	DNA Metabolism / DNA Metabolism - no subcategory / DNA structural proteins, bacterial / DNA-binding protein HBsu	DNA-binding protein HU, putative	chromosome condensation [GO:0030261]; regulation of nucleic acid-templated transcription [GO:1903506]	K03530;	0	-0.35	-0.03	-0.08	0	-0.15	0.06	0.06	0.792437	0.124884	0.273778	0.999334	0.651963	0.920815	0.889144
SAOUHSC_01491	11	gpsA	NA	Q2FYG1	Carbohydrates / Sugar alcohols / Glycerol and Glycerol-3-phosphate Uptake and Utilization / Glycerol-3-phosphate dehydrogenase [NAD(P)+] (EC 1.1.1.94); Fatty Acids, Lipids, and Isoprenoids / Phospholipids / Glycerolipid and Glycerophospholipid Metabolism in Bacteria / Glycerol-3-phosphate dehydrogenase [NAD(P)+] (EC 1.1.1.94); Stress Response / Oxidative stress / Glutaredoxins / Glycerol-3-phosph…	Glycerol-3-phosphate dehydrogenase [NAD(P)+] (EC 1.1.1.94) (NAD(P)H-dependent glycerol-3-phosphate dehydrogenase)	carbohydrate metabolic process [GO:0005975]; glycerol-3-phosphate catabolic process [GO:0046168]; glycerophospholipid metabolic process [GO:0006650]; phospholipid biosynthetic process [GO:0008654]	K00057;	-0.03	-0.16	-0.04	-0.13	0.03	0.07	-0.17	-0.03	0.581033	0.650786	0.52264	0.999334	0.712485	0.795609	0.979773
SAOUHSC_01492	9	engA	NA	Q2FYG0	Protein Metabolism / Protein biosynthesis / Universal GTPases / GTP-binding protein EngA; COG1399 / GTP-binding protein EngA	GTPase Der (GTP-binding protein EngA)	ribosome biogenesis [GO:0042254]	K03977;	-0.02	0.19	0.01	0.29	0.02	0.09	-0.02	0.17	0.862111	0.0929518	0.211395	0.999334	0.99928	0.9944	0.8542
SAOUHSC_01493	24	rpsA	NA	Q2FYF9	Protein Metabolism / Protein biosynthesis / Ribosome SSU bacterial / SSU ribosomal protein S1p; Cell division-ribosomal stress proteins cluster / SSU ribosomal protein S1p	30S ribosomal protein S1, putative		K02945;	0.03	-0.24	-0.09	0.74	-0.03	-0.02	0.22	0.8	0.275938	0.00143607	1.83e-05	0.999334	0.28348	0.394454	0.947941
SAOUHSC_01496	10	cmk	NA	Q2FYF5	Nucleosides and Nucleotides / Pyrimidines / pyrimidine conversions / Cytidylate kinase (EC 2.7.4.25)	Cytidylate kinase (EC 2.7.4.14)	nucleotide phosphorylation [GO:0046939]; pantothenate biosynthetic process from valine [GO:0033317]	K00945;	-0.02	-0.13	-0.17	-0.44	0.02	-0.06	-0.13	-0.43	0.852501	0.0261293	0.00205637	0.999334	0.986176	0.794039	0.979773
SAOUHSC_01497	5	ansA	NA	Q2FYF4	Amino Acids and Derivatives / Glutamine, glutamate, aspartate, asparagine; ammonia assimilation / Glutamine, Glutamate, Aspartate and Asparagine Biosynthesis / L-asparaginase (EC 3.5.1.1)	L-asparaginase, putative (EC 3.5.1.1)	asparagine catabolic process [GO:0006530]	K01424;	0.06	-0.03	-0.23	-0.13	-0.06	-0.06	-0.19	0.22	0.406384	0.225341	0.0708818	0.999334	0.990596	0.799074	0.413946
SAOUHSC_01499	7	-	NA	Q2FYF3	Nucleosides and Nucleotides / Pyrimidines / pyrimidine conversions / Thioredoxin reductase (EC 1.8.1.9); Sulfur Metabolism / Sulfur Metabolism - no subcategory / Thioredoxin-disulfide reductase / Thioredoxin reductase (EC 1.8.1.9)	Uncharacterized protein		K00384;	-0.11	0.04	-0.15	0.21	0.11	-0.18	0	0	0.234302	0.0605532	0.617982	0.999334	0.502364	0.894727	0.401993
SAOUHSC_01501	12	ebpS	Agr/rot	Q2FYF1	Virulence, Disease and Defense / Adhesion / Adhesins in Staphylococcus / Elastin binding protein EbpS	Elastin-binding protein EbpS			-0.08	-0.42	0.36	0.82	0.08	-0.12	0.35	1.08	0.72024	0.00282876	6.28e-06	0.999334	0.701599	0.915363	0.934847
SAOUHSC_01514	3	-	NA	Q2FYE0	Arginine Biosynthesis extended / hypothetical protein	Hypothetical phage protein			-0.01	-0.63	-0.57	-0.39	0.01	-0.17	-0.16	-0.62	0.802464	0.0433252	0.264062	0.999334	0.931025	0.972295	0.883313
SAOUHSC_01575	9	-	NA	Q2FY89	CI-like repressor, phage associated	Helix-turn-helix domain protein			0.02	-0.4	-0.07	0.24	-0.02	-0.2	-0.17	0.17	0.599157	0.0297858	0.103901	0.999334	0.657698	0.992154	0.906939
SAOUHSC_01576	3	-	NA	Q2FY88	DNA helicase, phage-associated	Exonuclease family	mismatch repair [GO:0006298]		-0.02	0.02	-0.38	0.3	0.02	0.33	-0.9	-1.09	0.134038	0.0988374	0.00415144	0.999334	0.990596	0.983471	0.25611
SAOUHSC_01577	2	-	NA	Q2FY87	NA	Conserved hypothetical phage protein			-0.25	-0.08	-0.17	-0.11	0.25	0.13	-1.32	0.32	0.95716	0.356117	0.0390301	0.999334	0.938878	0.954632	0.970543
SAOUHSC_01585	2	srrB	Rex	Q2FY80	Potassium metabolism / Potassium metabolism - no subcategory / Potassium homeostasis / Osmosensitive K+ channel histidine kinase KdpD (EC 2.7.3.-)	Sensor protein SrrB (EC 2.7.13.3) (Staphylococcal respiratory response protein B)		K07651;	-0.08	0.06	0.32	0.45	0.08	0.08	-1.46	-1.53	0.0427515	0.219021	0.00338956	0.999334	0.993555	0.135062	0.169803
SAOUHSC_01586	8	srrA	Rex	Q2FY79	Staphylococcal respiratory response protein SrrA	Transcriptional regulatory protein SrrA (Staphylococcal respiratory response protein A)	phosphorelay signal transduction system [GO:0000160]; regulation of transcription, DNA-templated [GO:0006355]; transcription, DNA-templated [GO:0006351]	K07775;	0.04	0.04	0.27	0.56	-0.04	0.6	0.16	0.65	0.11231	0.0127589	0.00315369	0.999334	0.126807	0.842597	0.924306
SAOUHSC_01587	4	rluB	NA	Q2FY78	Two cell division clusters relating to chromosome partitioning / Ribosomal large subunit pseudouridine synthase B (EC 5.4.99.22)	Pseudouridine synthase (EC 5.4.99.-)	enzyme-directed rRNA pseudouridine synthesis [GO:0000455]	K06178;	0.05	0.1	-0.02	-0.1	-0.05	0.03	0.04	-0.07	0.570353	0.314622	0.884307	0.999334	0.819131	0.695485	0.979773
SAOUHSC_01588	4	scpB	NA	Q2FY77	Cell Division and Cell Cycle / Cell Division and Cell Cycle - no subcategory / Two cell division clusters relating to chromosome partitioning / Segregation and condensation protein B	Segregation and condensation protein B	cell division [GO:0051301]; chromosome separation [GO:0051304]	K06024;	0.04	0.29	0.31	0.1	-0.04	0.18	-0.27	0.58	0.0162596	0.0201973	0.00379491	0.999334	0.985056	0.115572	0.374341
SAOUHSC_01591	3	xerD	NA	Q2FY74	Site-specific tyrosine recombinase XerD	Tyrosine recombinase XerD	cell cycle [GO:0007049]; cell division [GO:0051301]; chromosome segregation [GO:0007059]; transposition, DNA-mediated [GO:0006313]	K04763;	-0.01	-0.27	-0.48	-0.39	0.01	-0.16	-1.1	-1.19	0.602035	0.548435	0.00408287	0.999334	0.985056	0.610959	0.986013
SAOUHSC_01592	6	fur	PerR	Q2FY73	Stress Response / Oxidative stress / Oxidative stress / Ferric uptake regulation protein FUR; Bacterial RNA-metabolizing Zn-dependent hydrolases / Ferric uptake regulation protein FUR	Transcriptional regulator, Fur, putative		K03711;	0.03	-0.37	-0.25	0.09	-0.03	-0.4	-0.17	-0.15	0.228262	0.0619486	0.0661036	0.999334	0.995088	0.475733	0.690718
SAOUHSC_01593	2	-	NA	Q2FY72	Cofactors, Vitamins, Prosthetic Groups, Pigments / NAD and NADP / NAD and NADP cofactor biosynthesis global / ADP-ribose pyrophosphatase (EC 3.6.1.13); Nucleosides and Nucleotides / Detoxification / Nudix proteins (nucleoside triphosphate hydrolases) / ADP-ribose pyrophosphatase (EC 3.6.1.13)	NUDIX domain protein		K01515;	0.1	-0.07	-0.34	-0.33	-0.1	0.07	-0.07	0.14	0.637545	0.465003	0.922542	0.999334	0.692478	0.610959	0.617683
SAOUHSC_01594	6	-	NA	Q2FY71	Oxidoreductase, aldo/keto reductase family protein	Uncharacterized protein			-0.03	-0.42	-0.18	-1.71	0.03	-0.23	-0.05	0.19	0.0748005	0.100217	0.375732	0.999334	0.824907	0.977165	0.166417
SAOUHSC_01597	5	proC	NA	Q2FY68	Amino Acids and Derivatives / Proline and 4-hydroxyproline / A Hypothetical Protein Related to Proline Metabolism / Pyrroline-5-carboxylate reductase (EC 1.5.1.2); Amino Acids and Derivatives / Proline and 4-hydroxyproline / Proline Synthesis / Pyrroline-5-carboxylate reductase (EC 1.5.1.2); Amino Acids and Derivatives / Proline and 4-hydroxyproline / Proline, 4-hydroxyproline uptake and utilizat…	Pyrroline-5-carboxylate reductase (p5C reductase) (p5CR) (EC 1.5.1.2) (PCA reductase)	L-proline biosynthetic process [GO:0055129]	K00286;	-0.07	-0.84	-0.07	0.36	0.07	-0.64	0.18	0.39	0.690596	0.000189023	0.00651272	0.999334	0.532481	0.69911	0.889158
SAOUHSC_01598	3	rnz	NA	Q2FY67	RNA Metabolism / RNA processing and modification / tRNA processing / Ribonuclease Z (EC 3.1.26.11)	Ribonuclease Z (RNase Z) (EC 3.1.26.11) (tRNA 3 endonuclease) (tRNase Z)		K00784;	-0.07	0.53	0.51	0.31	0.07	0.65	-1.28	-1.47	0.0361167	0.424488	0.000140951	0.999334	0.990596	0.127579	0.163618
SAOUHSC_01599	14	zwf	NA	Q2FY66	Carbohydrates / Central carbohydrate metabolism / Glycolysis and Gluconeogenesis / Glucose-6-phosphate 1-dehydrogenase (EC 1.1.1.49); Carbohydrates / Central carbohydrate metabolism / Pentose phosphate pathway / Glucose-6-phosphate 1-dehydrogenase (EC 1.1.1.49); Carbohydrates / Fermentation / Fermentations: Lactate / Glucose-6-phosphate 1-dehydrogenase (EC 1.1.1.49); Carbohydrates / One-carbon Me…	Glucose-6-phosphate 1-dehydrogenase (G6PD) (EC 1.1.1.49)	glucose metabolic process [GO:0006006]; pentose-phosphate shunt [GO:0006098]	K00036;	0.02	-0.16	0.07	0.59	-0.02	0	-0.25	0.34	0.115145	0.00461053	0.00332374	0.999334	0.548391	0.329816	0.810306
SAOUHSC_01604	6	-	NA	Q2FY61	Glyoxalase/bleomycin resistance protein/dioxygenase superfamily protein	Uncharacterized protein			0.03	0.26	0.56	0.6	-0.03	0.13	0.45	0.24	0.71267	0.0150363	0.263304	0.999334	0.900895	0.971036	0.77351
SAOUHSC_01605	25	gnd	NA	Q2FY60	Carbohydrates / Central carbohydrate metabolism / Pentose phosphate pathway / 6-phosphogluconate dehydrogenase, decarboxylating (EC 1.1.1.44); Carbohydrates / Monosaccharides / D-gluconate and ketogluconates metabolism / 6-phosphogluconate dehydrogenase, decarboxylating (EC 1.1.1.44); Carbohydrates / One-carbon Metabolism / Formaldehyde assimilation: Ribulose monophosphate pathway / 6-phosphogluc…	6-phosphogluconate dehydrogenase, decarboxylating (EC 1.1.1.44)	D-gluconate metabolic process [GO:0019521]; pentose-phosphate shunt [GO:0006098]	K00033;	0.02	-0.11	-0.1	0.39	-0.02	-0.06	0.01	0.24	0.456775	0.0204922	0.0214415	0.999334	0.6628	0.799074	0.824907
SAOUHSC_01606	8	-	NA	Q2FY59	Peptidase T (EC 3.4.11.4)	Peptidase T, putative (EC 3.4.11.14)		K01258;	0.03	-0.44	0	-0.14	-0.03	-0.17	-0.27	0.04	0.218426	0.00957387	0.278827	0.999334	0.32458	0.810006	0.771338
SAOUHSC_01610	5	-	NA	Q2FY55	UPF0403 protein YqiW	UPF0403 protein SAOUHSC_01610			-0.01	-0.2	-0.35	-0.06	0.01	0.19	0.17	0.17	0.553171	0.644017	0.713253	0.999334	0.376634	0.699562	0.814727
SAOUHSC_01611	8	bmfBB	NA	Q2FY54	Amino Acids and Derivatives / Branched-chain amino acids / Isoleucine degradation / Dihydrolipoamide acyltransferase component of branched-chain alpha-keto acid dehydrogenase complex (EC 2.3.1.168); Amino Acids and Derivatives / Branched-chain amino acids / Valine degradation / Dihydrolipoamide acyltransferase component of branched-chain alpha-keto acid dehydrogenase complex (EC 2.3.1.168); Carbo…	Dihydrolipoamide acetyltransferase component of pyruvate dehydrogenase complex (EC 2.3.1.-)	metabolic process [GO:0008152]	K09699;	-0.08	0.05	0.22	0.32	0.08	0.25	0.03	0.24	0.0830784	0.0685006	0.0714898	0.556076	0.986176	0.115572	0.25611
SAOUHSC_01612	9	bfmBAB	NA	Q2FY53	Amino Acids and Derivatives / Branched-chain amino acids / Isoleucine degradation / Branched-chain alpha-keto acid dehydrogenase, E1 component, beta subunit (EC 1.2.4.4); Amino Acids and Derivatives / Branched-chain amino acids / Valine degradation / Branched-chain alpha-keto acid dehydrogenase, E1 component, beta subunit (EC 1.2.4.4); Carbohydrates / Central carbohydrate metabolism / Dehydrogena…	2-oxoisovalerate dehydrogenase, E1 component, beta subunit, putative (EC 1.2.4.1)		K00167;	-0.02	0.13	0.13	0.18	0.02	-0.1	0.01	0.31	0.468088	0.286216	0.104324	0.999334	0.583441	0.553553	0.970543
SAOUHSC_01613	6	bfmBAA	NA	Q2FY52	Amino Acids and Derivatives / Branched-chain amino acids / Isoleucine degradation / Branched-chain alpha-keto acid dehydrogenase, E1 component, alpha subunit (EC 1.2.4.4); Amino Acids and Derivatives / Branched-chain amino acids / Valine degradation / Branched-chain alpha-keto acid dehydrogenase, E1 component, alpha subunit (EC 1.2.4.4); Carbohydrates / Central carbohydrate metabolism / Dehydroge…	2-oxoisovalerate dehydrogenase subunit alpha (EC 1.2.4.4) (Branched-chain alpha-keto acid dehydrogenase E1 component alpha chain)	branched-chain amino acid catabolic process [GO:0009083]	K00166;	0	0.27	-0.03	0.23	0	0.08	0.05	0.11	0.497671	0.108811	0.646649	0.999334	0.443579	0.966611	0.893418
SAOUHSC_01615	19	recN	NA	Q2FY50	DNA Metabolism / DNA repair / DNA repair, bacterial / DNA repair protein RecN; DNA Metabolism / DNA replication / DNA-replication / DNA repair protein RecN	DNA repair protein RecN (Recombination protein N)	DNA recombination [GO:0006310]; DNA repair [GO:0006281]	K03631;	0	0.09	0.07	0.3	0	-0.03	-0.3	0.4	0.235748	0.0336855	0.000613151	0.999334	0.993555	0.292343	0.979773
SAOUHSC_01617	6	argR	NA	Q2FY49	Amino Acids and Derivatives / Arginine; urea cycle, polyamines / Arginine and Ornithine Degradation / Arginine pathway regulatory protein ArgR, repressor of arg regulon; Amino Acids and Derivatives / Arginine; urea cycle, polyamines / Arginine Biosynthesis extended / Arginine pathway regulatory protein ArgR, repressor of arg regulon; Amino Acids and Derivatives / Arginine; urea cycle, polyamines …	Arginine repressor	arginine biosynthetic process [GO:0006526]; protein complex oligomerization [GO:0051259]; transcription, DNA-templated [GO:0006351]	K03402;	0.02	-0.07	-0.02	0.39	-0.02	-0.1	-0.12	0.33	0.93224	0.0179176	0.00742781	0.999334	0.933385	0.967866	0.953733
SAOUHSC_01618	6	ispA	NA	Q2FY48	Archaeal lipids / Octaprenyl diphosphate synthase (EC 2.5.1.90) / Dimethylallyltransferase (EC 2.5.1.1) / (2E,6E)-farnesyl diphosphate synthase (EC 2.5.1.10) / Geranylgeranyl pyrophosphate synthetase (EC 2.5.1.29); Carotenoids / Octaprenyl diphosphate synthase (EC 2.5.1.90) / Dimethylallyltransferase (EC 2.5.1.1) / (2E,6E)-farnesyl diphosphate synthase (EC 2.5.1.10) / Geranylgeranyl pyrophosphate…	Geranyltranstransferase, putative (EC 2.5.1.10)	isoprenoid biosynthetic process [GO:0008299]	K13789;	0.01	0.13	0	-0.26	-0.01	-0.07	-0.31	-0.16	0.243599	0.109971	0.0311893	0.999334	0.606837	0.502226	0.801035
SAOUHSC_01619	3	xseB	NA	Q2FY47	DNA Metabolism / DNA repair / DNA repair, bacterial / Exodeoxyribonuclease VII small subunit (EC 3.1.11.6)	Exodeoxyribonuclease 7 small subunit (EC 3.1.11.6) (Exodeoxyribonuclease VII small subunit) (Exonuclease VII small subunit)	DNA catabolic process [GO:0006308]	K03602;	1.01	0.09	-0.17	1.2	-1.01	0.8	0.65	0.45	0.186063	0.0530689	0.0216462	0.999334	0.121378	0.358183	0.818339
SAOUHSC_01620	4	xseA	NA	Q2FY46	DNA Metabolism / DNA repair / DNA repair, bacterial / Exodeoxyribonuclease VII large subunit (EC 3.1.11.6)	Exodeoxyribonuclease 7 large subunit (EC 3.1.11.6) (Exodeoxyribonuclease VII large subunit) (Exonuclease VII large subunit)	DNA catabolic process [GO:0006308]	K03601;	0.01	0.04	-0.09	0.11	-0.01	-0.06	-0.12	0.04	0.987828	0.616477	0.39223	0.999334	0.990596	0.958842	0.979773
SAOUHSC_01621	4	nusB	NA	Q2FY45	RNA Metabolism / Transcription / Transcription factors bacterial / Transcription termination protein NusB	Transcription antitermination protein NusB (Antitermination factor NusB)	DNA-templated transcription, termination [GO:0006353]; transcription antitermination [GO:0031564]	K03625;	0.01	0.16	0.12	0.32	-0.01	-0.05	0.03	0.41	0.414974	0.133373	0.00577283	0.999334	0.503646	0.774508	0.900145
SAOUHSC_01623	12	accC	NA	Q2FY43	Fatty Acids, Lipids, and Isoprenoids / Fatty acids / Fatty Acid Biosynthesis FASII / Biotin carboxylase of acetyl-CoA carboxylase (EC 6.3.4.14); Miscellaneous / Miscellaneous - no subcategory / EC 6.3.4.- Ligases that form carbon-nitrogen bonds / Biotin carboxylase of acetyl-CoA carboxylase (EC 6.3.4.14)	Acetyl-CoA carboxylase, biotin carboxylase (EC 6.4.1.2)		K01961;	-0.03	0.09	-0.04	0	0.03	0.05	-0.21	-0.19	0.335836	0.431105	0.00743037	0.999334	0.606837	0.310163	0.401993
SAOUHSC_01624	5	accB	NA	Q2FY42	Fatty Acids, Lipids, and Isoprenoids / Fatty acids / Fatty Acid Biosynthesis FASII / Biotin carboxyl carrier protein of acetyl-CoA carboxylase; Miscellaneous / Miscellaneous - no subcategory / EC 6.3.4.- Ligases that form carbon-nitrogen bonds / Biotin carboxyl carrier protein of acetyl-CoA carboxylase	Biotin carboxyl carrier protein of acetyl-CoA carboxylase	fatty acid biosynthetic process [GO:0006633]	K02160;	0.06	0.02	-0.02	-0.18	-0.06	-0.08	-0.32	-0.44	0.393956	0.904381	0.00316242	0.999334	0.990596	0.697072	0.449244
SAOUHSC_01625	8	efp	SigB	Q2FY41	Protein Metabolism / Protein biosynthesis / Translation elongation factors bacterial / Translation elongation factor P	Elongation factor P (EF-P)		K02356;	0.03	-0.05	-0.26	-0.08	-0.03	-0.13	-0.12	-0.32	0.973715	0.186006	0.348584	0.999334	0.980332	0.935553	0.903706
SAOUHSC_01626	12	pepQ2	NA	Q2FY40	Protein Metabolism / Protein degradation / Protein degradation / Aminopeptidase YpdF (MP-, MA-, MS-, AP-, NP- specific)	Proline dipeptidase, putative (EC 3.4.13.9)		K01262;	0.07	-0.63	-0.29	0.39	-0.07	-0.3	-0.21	0.38	0.11231	0.000438352	0.000477347	0.999334	0.0656598	0.828951	0.814727
SAOUHSC_01627	4	-	NA	Q2FY39	FIG01108536: hypothetical protein	Uncharacterized protein			0.03	-0.23	-0.21	-0.03	-0.03	-0.07	-0.54	-0.06	0.685365	0.253419	0.0771067	0.999334	0.976361	0.688212	0.997385
SAOUHSC_01629	6	lipM	CodY	Q2FY37	Dehydrogenase complexes / Octanoate-[acyl-carrier-protein]-protein-N-octanoyltransferase, LipM (EC 2.3.1.181); Lipoic acid metabolism / Octanoate-[acyl-carrier-protein]-protein-N-octanoyltransferase, LipM (EC 2.3.1.181)	Octanoyltransferase LipM (EC 2.3.1.181) (Octanoyl-[acyl-carrier-protein]:[GcvH] N-octanoyltransferase)	lipoate biosynthetic process [GO:0009107]; protein lipoylation [GO:0009249]	K03800;	-0.07	-0.12	0.05	0.44	0.07	0.1	0.09	0.36	0.587735	0.0248671	0.170795	0.999334	0.993555	0.610959	0.727552
SAOUHSC_01630	3	-	CodY	Q2FY36	Potassium metabolism / Potassium metabolism - no subcategory / Glutathione-regulated potassium-efflux system and associated functions / Rhodanese-like domain protein; RNA Metabolism / RNA processing and modification / tRNA modification Archaea / Rhodanese-like domain protein; Stress Response / Oxidative stress / Glutaredoxins / Rhodanese-like domain protein	Uncharacterized protein			0.1	-0.07	-0.17	-0.98	-0.1	0.09	-0.65	-0.85	0.365321	0.0288931	0.0373686	0.999334	0.695671	0.567757	0.975938
SAOUHSC_01632	8	gcvPB	NA	Q2FY35	Amino Acids and Derivatives / Alanine, serine, and glycine / Glycine and Serine Utilization / Glycine dehydrogenase [decarboxylating] (glycine cleavage system P2 protein) (EC 1.4.4.2); Amino Acids and Derivatives / Alanine, serine, and glycine / Glycine cleavage system / Glycine dehydrogenase [decarboxylating] (glycine cleavage system P2 protein) (EC 1.4.4.2); Cofactors, Vitamins, Prosthetic Grou…	Probable glycine dehydrogenase (decarboxylating) subunit 2 (EC 1.4.4.2) (Glycine cleavage system P-protein subunit 2) (Glycine decarboxylase subunit 2) (Glycine dehydrogenase (aminomethyl-transferring) subunit 2)	glycine decarboxylation via glycine cleavage system [GO:0019464]	K00283;	-0.02	0.47	0.42	0.88	0.02	0.36	0.81	0.98	0.511989	0.0348833	0.000117659	0.999334	0.856432	0.605778	0.997378
SAOUHSC_01633	10	gcvPA	NA	Q2FY34	Amino Acids and Derivatives / Alanine, serine, and glycine / Glycine and Serine Utilization / Glycine dehydrogenase [decarboxylating] (glycine cleavage system P1 protein) (EC 1.4.4.2); Amino Acids and Derivatives / Alanine, serine, and glycine / Glycine cleavage system / Glycine dehydrogenase [decarboxylating] (glycine cleavage system P1 protein) (EC 1.4.4.2)	Probable glycine dehydrogenase (decarboxylating) subunit 1 (EC 1.4.4.2) (Glycine cleavage system P-protein subunit 1) (Glycine decarboxylase subunit 1) (Glycine dehydrogenase (aminomethyl-transferring) subunit 1)	glycine catabolic process [GO:0006546]; nucleoside metabolic process [GO:0009116]	K00282;	-0.05	0.04	0.45	0.83	0.05	0.24	0.45	0.85	0.662724	0.0186114	0.00728166	0.999334	0.657698	0.942892	0.979773
SAOUHSC_01634	10	gcvT	NA	Q2FY33	Amino Acids and Derivatives / Alanine, serine, and glycine / Glycine and Serine Utilization / Aminomethyltransferase (glycine cleavage system T protein) (EC 2.1.2.10); Amino Acids and Derivatives / Alanine, serine, and glycine / Glycine cleavage system / Aminomethyltransferase (glycine cleavage system T protein) (EC 2.1.2.10)	Aminomethyltransferase (EC 2.1.2.10) (Glycine cleavage system T protein)	glycine catabolic process [GO:0006546]	K00605;	0.08	0.36	0.73	0.63	-0.08	0.37	0.79	0.72	0.414974	0.0104916	6.57e-05	0.999334	0.33811	0.918153	0.628126
SAOUHSC_01644	4	-	NA	Q2FY29	Cobalt-zinc-cadmium resistance / MBL-fold metallo-hydrolase superfamily; Glutathione: Non-redox reactions / MBL-fold metallo-hydrolase superfamily; Glutathione-regulated potassium-efflux system and associated functions / MBL-fold metallo-hydrolase superfamily; Methylglyoxal Metabolism / MBL-fold metallo-hydrolase superfamily	Uncharacterized protein			0	0.4	-0.11	-1.07	0	0.21	-1.94	-1.11	0.125142	0.000990802	0.00315602	0.999334	0.989128	0.135062	0.988848
SAOUHSC_01645	2	-	NA	Q2FY28	UPF0045 protein YqgV	Uncharacterized protein			-0.01	-0.2	-0.26	-0.26	0.01	-0.14	-0.47	-0.42	0.529493	0.246861	0.00339409	0.999334	0.931025	0.521234	0.600928
SAOUHSC_01646	9	glk	NA	Q2FY27	Carbohydrates / Central carbohydrate metabolism / Glycolysis and Gluconeogenesis / Glucokinase (EC 2.7.1.2)	Glucokinase, putative	glycolytic process [GO:0006096]	K00845;	0.05	-0.14	-0.07	0	-0.05	-0.09	-0.27	-0.07	0.685365	0.383107	0.440053	0.999334	0.772906	0.836747	0.953391
SAOUHSC_01649	3	-	NA	Q2FY24	FIG056164: rhomboid family serine protease	Rhomboid family protein			-0.17	-0.11	-0.49	-0.26	0.17	0.21	-0.74	-0.85	0.528284	0.145642	0.0787578	0.999334	0.986176	0.894727	0.495728
SAOUHSC_01652	21	pbp3	NA	Q2FY21	Bacterial Cell Division / Cell division protein FtsI [Peptidoglycan synthetase] (EC 2.4.1.129) / Transpeptidase, Penicillin binding protein transpeptidase domain; Bacterial Cytoskeleton / Cell division protein FtsI [Peptidoglycan synthetase] (EC 2.4.1.129) / Transpeptidase, Penicillin binding protein transpeptidase domain; Peptidoglycan Biosynthesis / Cell division protein FtsI [Peptidoglycan syn…	Penicillin-binding protein 3		K12553;	-0.03	-0.14	-0.35	-0.17	0.03	-0.11	-0.76	-0.53	0.203874	0.106258	0.00607846	0.999334	0.938878	0.365428	0.449244
SAOUHSC_01653	4	sodA	CodY , SigB	P0A0J3	Stress Response / Oxidative stress / Oxidative stress / Superoxide dismutase [Fe] (EC 1.15.1.1); Stress Response / Oxidative stress / Oxidative stress / Superoxide dismutase [Mn] (EC 1.15.1.1); Stress Response / Oxidative stress / Protection from Reactive Oxygen Species / Superoxide dismutase [Fe] (EC 1.15.1.1); Nitric oxide synthase / Superoxide dismutase [Fe] (EC 1.15.1.1)	Superoxide dismutase [Mn] 1 (EC 1.15.1.1)		K04564;	0	-0.57	-0.23	-1.65	0	-0.6	-1.49	-1.62	0.231406	0.0246452	0.00349781	0.999334	0.990596	0.229553	0.938848
SAOUHSC_01655	3	zur	NA	Q2FY19	Oxidative stress / Zinc uptake regulation protein Zur	Ferric uptake regulation protein (Ferric uptake regulator)	transcription, DNA-templated [GO:0006351]	K02076;	0.08	0.27	0.2	-0.94	-0.08	0.05	-1.49	-1.11	0.112648	0.0431587	0.00839019	0.999334	0.967161	0.197102	0.868303
SAOUHSC_01657	2	znuC	NA	Q2FY17	Zinc ABC transporter, ATP-binding protein ZnuC	ABC transporter, putative		K09817;	0.02	0.76	0.49	0.54	-0.02	0.35	0.07	-0.58	0.354268	0.0178396	0.0379978	0.999334	0.819131	0.56595	0.336694
SAOUHSC_01658	8	nfo	NA	Q2FY16	DNA Metabolism / DNA repair / DNA repair, bacterial / Endonuclease IV (EC 3.1.21.2)	Probable endonuclease 4 (EC 3.1.21.2) (Endodeoxyribonuclease IV) (Endonuclease IV)	base-excision repair [GO:0006284]	K01151;	0	0.42	0.17	-0.12	0	0.16	-0.5	-0.64	0.266941	0.00934087	0.00968558	0.999334	0.692478	0.229553	0.409268
SAOUHSC_01659	10	-	NA	Q2FY15	RNA Metabolism / RNA processing and modification / ATP-dependent RNA helicases, bacterial / DEAD-box ATP-dependent RNA helicase CshB (EC 3.6.4.13)	DEAD-box ATP-dependent RNA helicase CshB (EC 3.6.4.13)	response to cold [GO:0009409]; RNA secondary structure unwinding [GO:0010501]	K18692;	0.04	0.32	0.34	0.13	-0.04	0.27	0.26	0.02	0.860148	0.0898465	0.102767	0.999334	0.990596	0.758642	0.997385
SAOUHSC_01661	3	-	NA	Q2FY13	Putative tRNA-m1A22 methylase	Uncharacterized protein		K06967;	0.08	0.4	0.15	0.3	-0.08	0.05	0.22	-0.18	0.131427	0.118898	0.0320873	0.999334	0.639666	0.545118	0.440537
SAOUHSC_01662	14	sigA	NA	P0A0J0	RNA Metabolism / Transcription / Transcription initiation, bacterial sigma factors / RNA polymerase sigma factor RpoD	RNA polymerase sigma factor SigA	DNA-templated transcription, initiation [GO:0006352]	K03086;	-0.04	0.34	0.23	0.36	0.04	0.12	0.11	0.27	0.189909	0.0279441	0.132316	0.999334	0.122895	0.273542	0.385622
SAOUHSC_01663	3	dnaG	NA	Q2FY11	DNA Metabolism / DNA replication / DNA-replication / DNA primase (EC 2.7.7.-)	DNA primase (EC 2.7.7.-)		K02316;	0.01	0.84	0.2	1.01	-0.01	0.52	-1.04	0.23	0.511989	0.00133195	0.2424	0.999334	0.993555	0.520283	0.741125
SAOUHSC_01664	9	-	NA	Q2FY10	ATP/GTP-binding protein, SA1392 homolog	Putative pyruvate, phosphate dikinase regulatory protein (PPDK regulatory protein) (EC 2.7.11.32) (EC 2.7.4.27)		K09773;	-0.02	-0.01	0	0.51	0.02	0.23	0.28	0.71	0.932982	0.0460454	0.00704514	0.999334	0.819131	0.915363	0.903729
SAOUHSC_01665	2	-	NA	Q2FY09	CBS domain protein, lmo1865 homolog	CBS domain protein			-0.04	0.07	0.33	-0.32	0.04	0.29	0.4	0.09	0.975348	0.254763	0.296876	0.999334	0.990596	0.920815	0.978326
SAOUHSC_01666	26	glyS	NA	Q2FY08	Glycyl-tRNA synthetase (EC 6.1.1.14)	Glycine--tRNA ligase (EC 6.1.1.14) (Glycyl-tRNA synthetase) (GlyRS)	glycyl-tRNA aminoacylation [GO:0006426]	K01880;	0	-0.68	-0.57	-0.25	0	-0.7	-0.57	-0.41	0.242556	0.00282404	0.000177855	0.999334	0.910797	0.901545	0.35987
SAOUHSC_01668	7	era	NA	Q2FY06	Protein Metabolism / Protein biosynthesis / Universal GTPases / GTP-binding protein Era; RNA Metabolism / RNA processing and modification / tRNA modification Archaea / GTP-binding protein Era; Bacterial Cell Division / GTP-binding protein Era; CBSS-176299.4.peg.1292 / GTP-binding protein Era; COG1399 / GTP-binding protein Era	GTPase Era	ribosome biogenesis [GO:0042254]	K03595;	-0.04	-0.06	-0.07	0.32	0.04	0.04	-0.07	0.28	0.735916	0.112722	0.273778	0.999334	0.993555	0.699562	0.814727
SAOUHSC_01670	3	cdd	NA	Q2FY04	Nucleosides and Nucleotides / Pyrimidines / pyrimidine conversions / Cytidine deaminase (EC 3.5.4.5); Regulation and Cell signaling / Programmed Cell Death and Toxin-antitoxin Systems / Murein hydrolase regulation and cell death / Cytidine deaminase (EC 3.5.4.5)	Cytidine deaminase (EC 3.5.4.5) (Cytidine aminohydrolase)	cytidine deamination [GO:0009972]	K01489;	-0.21	0.01	-0.65	0.29	0.21	-0.14	-0.8	0.4	0.34598	0.498154	0.0409475	0.999334	0.328362	0.310168	0.69745
SAOUHSC_01672	5	ybeY	NA	Q2FY02	Phosphorus Metabolism / Phosphorus Metabolism - no subcategory / Phosphate metabolism / Metal-dependent hydrolase YbeY, involved in rRNA and/or ribosome maturation and assembly; CBSS-56780.10.peg.1536 / Metal-dependent hydrolase YbeY, involved in rRNA and/or ribosome maturation and assembly	Endoribonuclease YbeY (EC 3.1.-.-)	rRNA processing [GO:0006364]	K07042;	0.39	0.15	0.22	0.58	-0.39	0.23	0.66	0.57	0.0402675	0.290237	0.00280969	0.0786638	0.0656598	0.0387772	0.180316
SAOUHSC_01673	8	phoH	NA	Q2FY01	Phosphorus Metabolism / Phosphorus Metabolism - no subcategory / Phosphate metabolism / Phosphate starvation-inducible protein PhoH, predicted ATPase; CBSS-56780.10.peg.1536 / Phosphate starvation-inducible protein PhoH, predicted ATPase	Uncharacterized protein		K06217;	-0.03	-0.01	-0.08	0.28	0.03	0.14	0.42	0.38	0.131427	0.130434	0.00355626	0.999334	0.58463	0.115572	0.934847
SAOUHSC_01675	4	-	NA	Q2FY00	FIG01108188: hypothetical protein	Uncharacterized protein			-0.06	-0.02	0.23	0.55	0.06	0.18	0.03	0.74	0.29523	0.0796609	0.0658723	0.999334	0.731373	0.467931	0.992113
SAOUHSC_01676	16	-	NA	Q2FXZ9	UPF0365 protein YqfA	UPF0365 protein SAOUHSC_01676			0.01	0.08	0	0.76	-0.01	0.12	-0.01	0.82	0.507984	0.00106842	1.2e-05	0.999334	0.695671	0.758414	0.903729
SAOUHSC_01677	2	-	NA	Q2FXZ8	FIG01107945: hypothetical protein	Uncharacterized protein			-0.04	0.18	-0.02	0.33	0.04	0.36	0.46	0.65	0.680968	0.126347	0.00484063	0.999334	0.989044	0.695485	0.878526
SAOUHSC_01678	6	rpsU	NA	Q2FXZ7	Protein Metabolism / Protein biosynthesis / Ribosome SSU bacterial / SSU ribosomal protein S21p	30S ribosomal protein S21	translation [GO:0006412]	K02970;	-0.07	0.51	0.32	-0.04	0.07	0.17	-0.34	-0.12	0.0658307	0.0378237	0.0515224	0.999334	0.126807	0.0664855	0.801035
SAOUHSC_01680	2	rsmE	NA	Q2FXZ5	Stress Response / Heat shock / Heat shock dnaK gene cluster extended / Ribosomal RNA small subunit methyltransferase E (EC 2.1.1.-)	Ribosomal RNA small subunit methyltransferase E (EC 2.1.1.193)	rRNA base methylation [GO:0070475]	K09761;	0.04	0.06	0.23	-0.5	-0.04	-0.08	-0.97	-0.58	0.355869	0.338276	0.228328	0.999334	0.993555	0.349634	0.924306
SAOUHSC_01681	3	prmA	NA	Q2FXZ4	Protein Metabolism / Protein biosynthesis / Ribosome biogenesis bacterial / Ribosomal protein L11 methyltransferase (EC 2.1.1.-); Stress Response / Heat shock / Heat shock dnaK gene cluster extended / Ribosomal protein L11 methyltransferase (EC 2.1.1.-)	Ribosomal protein L11 methyltransferase (L11 Mtase) (EC 2.1.1.-)		K02687;	-0.02	0.32	-0.1	-0.02	0.02	-0.14	-0.56	-0.48	0.543652	0.0747529	0.15395	0.999334	0.679504	0.40959	0.801035
SAOUHSC_01682	11	dnaJ	CtsR	Q2FXZ3	Protein Metabolism / Protein folding / Protein chaperones / Chaperone protein DnaJ; Stress Response / Heat shock / Heat shock dnaK gene cluster extended / Chaperone protein DnaJ	Chaperone protein DnaJ	DNA replication [GO:0006260]; protein folding [GO:0006457]; response to heat [GO:0009408]	K03686;	0.05	0.23	-0.13	-0.01	-0.05	-0.08	-0.35	-0.53	0.434308	0.388605	0.0681468	0.999334	0.719986	0.685312	0.375329
SAOUHSC_01683	38	dnaK	CtsR	Q2FXZ2	Protein Metabolism / Protein folding / Protein chaperones / Chaperone protein DnaK; Stress Response / Heat shock / Heat shock dnaK gene cluster extended / Chaperone protein DnaK	Chaperone protein DnaK (HSP70) (Heat shock 70 kDa protein) (Heat shock protein 70)	protein folding [GO:0006457]	K04043;	0.02	0.09	-0.13	0.21	-0.02	-0.11	-0.22	0.09	0.636374	0.147752	0.0141398	0.999334	0.489548	0.894727	0.801035
SAOUHSC_01684	13	grpE	CtsR	Q2FXZ1	Protein Metabolism / Protein folding / Protein chaperones / Heat shock protein GrpE; Stress Response / Heat shock / Heat shock dnaK gene cluster extended / Heat shock protein GrpE	Protein GrpE (HSP-70 cofactor)	protein folding [GO:0006457]	K03687;	-0.03	0.25	-0.09	-0.13	0.03	-0.14	-0.17	-0.17	0.134038	0.215582	0.103901	0.999334	0.0656598	0.40959	0.520044
SAOUHSC_01688	21	lepA	NA	Q2FXY7	Protein Metabolism / Protein biosynthesis / Translation elongation factors bacterial / Translation elongation factor LepA; Protein Metabolism / Protein biosynthesis / Universal GTPases / Translation elongation factor LepA; Stress Response / Heat shock / Heat shock dnaK gene cluster extended / Translation elongation factor LepA	Elongation factor 4 (EF-4) (EC 3.6.5.n1) (Ribosomal back-translocase LepA)	translation [GO:0006412]	K03596;	-0.02	0.22	0.17	0.02	0.02	0.11	-0.13	-0.05	0.196949	0.126897	0.080103	0.999334	0.376634	0.13834	0.801035
SAOUHSC_01689	4	rpsT	NA	Q2FXY6	Protein Metabolism / Protein biosynthesis / Ribosome SSU bacterial / SSU ribosomal protein S20p	30S ribosomal protein S20	translation [GO:0006412]	K02968;	0.01	0.23	0.03	-0.75	-0.01	-0.11	-0.38	-0.9	0.977183	0.277247	0.0193129	0.999334	0.990596	0.916152	0.978326
SAOUHSC_01690	3	holA	NA	Q2FXY5	DNA Metabolism / DNA replication / DNA-replication / DNA polymerase III delta subunit (EC 2.7.7.7)	Uncharacterized protein	DNA replication [GO:0006260]	K02340;	0.02	0.55	0.46	0	-0.02	0.14	0.2	-0.15	0.663774	0.210671	0.811567	0.999334	0.790133	0.606565	0.997385
SAOUHSC_01695	5	rsfS	NA	Q2G298	Amino Acids and Derivatives / Proline and 4-hydroxyproline / Proline, 4-hydroxyproline uptake and utilization / Ribosomal silencing factor RsfA (former Iojap)	Ribosomal silencing factor RsfS	mature ribosome assembly [GO:0042256]; negative regulation of ribosome biogenesis [GO:0090071]; negative regulation of translation [GO:0017148]	K09710;	-0.07	0.23	0.16	-0.06	0.07	0.18	-0.11	-0.27	0.776603	0.325552	0.0176944	0.999334	0.990596	0.695485	0.884971
SAOUHSC_01696	3	-	NA	Q2G297	Hydrolase (HD superfamily), YqeK	Uncharacterized protein			0.03	-0.39	-0.26	-0.79	-0.03	-0.21	-0.72	-1.64	0.206491	0.100072	0.0155353	0.999334	0.944311	0.851075	0.320408
SAOUHSC_01698	3	-	NA	Q2FXY2	FIG004454: RNA binding protein	Uncharacterized protein		K07574;	0.01	0.21	-0.15	0.04	-0.01	0.04	0.09	0.24	0.101397	0.021387	0.20185	0.999334	0.225769	0.787995	0.801035
SAOUHSC_01699	3	aroE	NA	Q2FXY1	Amino Acids and Derivatives / Aromatic amino acids and derivatives / Chorismate Synthesis / Shikimate 5-dehydrogenase I alpha (EC 1.1.1.25); Amino Acids and Derivatives / Aromatic amino acids and derivatives / Common Pathway For Synthesis of Aromatic Compounds (DAHP synthase to chorismate) / Shikimate 5-dehydrogenase I alpha (EC 1.1.1.25); CBSS-281090.3.peg.464 / Shikimate 5-dehydrogenase I alpha…	Shikimate dehydrogenase (NADP(+)) (SDH) (EC 1.1.1.25)	aromatic amino acid family biosynthetic process [GO:0009073]; chorismate biosynthetic process [GO:0009423]; shikimate metabolic process [GO:0019632]	K00014;	-0.03	0.66	0.17	0.7	0.03	0.06	-0.07	0.55	0.435988	0.0254151	0.0676418	0.999334	0.369273	0.81314	0.992907
SAOUHSC_01700	4	-	NA	Q2FXY0	Protein Metabolism / Protein biosynthesis / Universal GTPases / GTP-binding protein YqeH, required for biogenesis of 30S ribosome subunit	Uncharacterized protein	ribosome biogenesis [GO:0042254]	K06948;	-0.05	0.17	0.06	-0.04	0.05	-0.05	-0.18	-0.18	0.0713102	0.310434	0.0193567	0.999334	0.255321	0.0387772	0.398723
SAOUHSC_01702	6	mtnN	NA	Q2FXX8	Amino Acids and Derivatives / Arginine; urea cycle, polyamines / Polyamine Metabolism / 5'-methylthioadenosine nucleosidase (EC 3.2.2.16); Amino Acids and Derivatives / Lysine, threonine, methionine, and cysteine / Methionine Biosynthesis / S-adenosylhomocysteine nucleosidase (EC 3.2.2.9); Amino Acids and Derivatives / Lysine, threonine, methionine, and cysteine / Methionine Degradation / S-adeno…	5'-methylthioadenosine/S-adenosylhomocysteine nucleosidase (MTA/SAH nucleosidase) (MTAN) (EC 3.2.2.9) (5'-methylthioadenosine nucleosidase) (MTA nucleosidase) (S-adenosylhomocysteine nucleosidase) (AdoHcy nucleosidase) (SAH nucleosidase) (SRH nucleosidase)	L-methionine salvage from methylthioadenosine [GO:0019509]; nucleoside catabolic process [GO:0009164]	K01243;	-0.02	-0.36	-0.22	0.02	0.02	-0.24	-0.25	0.13	0.553301	0.104599	0.105233	0.999334	0.614206	0.848842	0.970543
SAOUHSC_01710	2	-	NA	Q2FXX0	Carbohydrates / Central carbohydrate metabolism / Pyruvate metabolism I: anaplerotic reactions, PEP / Biotin carboxyl carrier protein; Allophanate hydrolase 2 and Biotin carboxylase cluster / Biotin carboxyl carrier protein	Acetyl-CoA carboxylase, biotin carboxyl carrier protein, putative		K02160;	-0.01	-0.62	0.23	-0.23	0.01	-0.37	0.34	-0.33	0.736894	0.0295808	0.0226026	0.999334	0.855615	0.699562	0.978326
SAOUHSC_01714	9	greA	NA	Q2FXW7	RNA Metabolism / Transcription / Transcription factors bacterial / Transcription elongation factor GreA	Transcription elongation factor GreA (Transcript cleavage factor GreA)	regulation of DNA-templated transcription, elongation [GO:0032784]; transcription, DNA-templated [GO:0006351]	K03624;	0.01	0.11	-0.01	0.16	-0.01	-0.07	0.12	-0.12	0.468071	0.30224	0.824936	0.999334	0.99928	0.502852	0.931932
SAOUHSC_01715	7	udk	NA	Q2FXW6	Nucleosides and Nucleotides / Pyrimidines / pyrimidine conversions / Uridine kinase (EC 2.7.1.48) [C1]	Uridine kinase (EC 2.7.1.48) (Cytidine monophosphokinase) (Uridine monophosphokinase)	CTP salvage [GO:0044211]; pyrimidine nucleobase metabolic process [GO:0006206]; pyrimidine nucleoside salvage [GO:0043097]; UMP salvage [GO:0044206]	K00876;	0.03	0.37	0.14	-0.01	-0.03	-0.02	0.15	-0.03	0.244255	0.0605532	0.388608	0.999334	0.252136	0.992154	0.997385
SAOUHSC_01716	6	-	NA	Q2FXW5	Uncharacterized protease large subunit YrrO	Uncharacterized protein		K08303;	-0.03	0.46	-2.28	-1.18	0.03	0.17	-1.26	-1.38	0.462372	0.00049615	0.00480151	0.999334	0.840656	0.623803	0.903706
SAOUHSC_01717	7	-	NA	Q2FXW4	Uncharacterized protease small subunit YrrN	Uncharacterized protein			-0.06	0.53	-1.79	-1.56	0.06	0.13	-1.77	-1.42	0.361714	5.02e-05	3.02e-05	0.999334	0.326005	0.820551	0.987719
SAOUHSC_01718	5	-	NA	Q2FXW3	FIG011945: O-methyltransferase family protein	Uncharacterized protein			-0.04	0.02	0.05	-0.25	0.04	0.19	-0.3	-0.78	0.112648	0.607809	0.00117586	0.999334	0.793188	0.537745	0.293534
SAOUHSC_01719	2	-	NA	Q2FXW2	FIG01108372: hypothetical protein	UPF0473 protein SAOUHSC_01719			-1.38	1.51	-5.64	0.27	1.38	0.97	1.81	1.51	0.203874	0.19607	0.398237	0.54362	0.237258	0.941757	0.60932
SAOUHSC_01720	4	-	NA	Q2FXW1	CBSS-257314.1.peg.488 / Putative pre-16S rRNA nuclease; CBSS-281090.3.peg.464 / Putative pre-16S rRNA nuclease	Putative pre-16S rRNA nuclease (EC 3.1.-.-)	rRNA 5'-end processing [GO:0000967]	K07447;	0.01	0.26	0.08	-0.02	-0.01	0.19	0.31	0.08	0.93473	0.311622	0.460499	0.999334	0.967533	0.894727	0.979773
SAOUHSC_01721	3	-	NA	Q2FXW0	CBSS-257314.1.peg.488 / UPF0297 protein YrzL	UPF0297 protein SAOUHSC_01721			-0.05	0.15	0.85	0.47	0.05	0.08	0.64	0.29	0.725413	0.0914411	0.367108	0.999334	0.990596	0.645232	0.801035
SAOUHSC_01722	28	alaS	NA	Q2FXV9	Protein Metabolism / Protein biosynthesis / tRNA aminoacylation, Ala / Alanyl-tRNA synthetase (EC 6.1.1.7); CBSS-257314.1.peg.488 / Alanyl-tRNA synthetase (EC 6.1.1.7); CBSS-281090.3.peg.464 / Alanyl-tRNA synthetase (EC 6.1.1.7)	Alanine--tRNA ligase (EC 6.1.1.7) (Alanyl-tRNA synthetase) (AlaRS)	alanyl-tRNA aminoacylation [GO:0006419]; tRNA modification [GO:0006400]	K01872;	0	0.05	0.04	0.04	0	-0.03	-0.11	-0.02	0.546781	0.919282	0.366813	0.999334	0.806311	0.413813	0.775849
SAOUHSC_01723	4	-	NA	Q2FXV8	DNA Metabolism / DNA repair / DNA repair, bacterial RecBCD pathway / RecD-like DNA helicase YrrC	ATP-dependent RecD-like DNA helicase (EC 3.6.4.12)		K03581;	-0.17	0.42	0.05	-0.39	0.17	0.34	-1.44	-0.21	0.11231	0.0747529	0.00846221	0.999334	0.990596	0.115572	0.941055
SAOUHSC_01726	8	mnmA	NA	NA	Cofactors, Vitamins, Prosthetic Groups, Pigments / Riboflavin, FMN, FAD / Riboflavin, FMN and FAD metabolism Extended / tRNA (5-methylaminomethyl-2-thiouridylate)-methyltransferase (EC 2.1.1.61)	NA	NA	NA	-0.01	-0.11	0.02	-0.14	0.01	-0.03	-0.53	-0.22	0.0361545	0.341471	0.00578122	0.999334	0.993555	0.0575073	0.979773
SAOUHSC_01727	4	-	NA	Q2FXV4	Amino Acids and Derivatives / Alanine, serine, and glycine / Alanine biosynthesis / Cysteine desulfurase (EC 2.8.1.7); RNA Metabolism / RNA processing and modification / tRNA modification Archaea / Cysteine desulfurase (EC 2.8.1.7); CBSS-393130.3.peg.794 / Cysteine desulfurase (EC 2.8.1.7); CBSS-84588.1.peg.1247 / Cysteine desulfurase (EC 2.8.1.7)	Uncharacterized protein		K04487;	-0.03	-0.2	-0.26	-0.26	0.03	-0.27	-0.44	-0.21	0.474843	0.503258	0.00380649	0.999334	0.980332	0.529185	0.910615
SAOUHSC_01729	3	-	SigB	Q2FXV2	FIG01108208: hypothetical protein	Uncharacterized protein			0.06	-1.09	-0.44	-1.08	-0.06	-0.57	-0.31	-0.88	0.691436	0.0354238	0.0089537	0.999334	0.531587	0.894727	0.871858
SAOUHSC_01730	5	csbD	SigB	Q2FXV1	sigmaB-controlled gene product	UPF0337 protein SAOUHSC_01730			-0.02	-0.92	-0.72	-1.98	0.02	-0.68	-0.23	-1.08	0.354268	0.0129531	0.000200137	0.999334	0.821548	0.527876	0.336694
SAOUHSC_01732	4	cymR	NA	Q2FXV0	RNA Metabolism / Transcription / Rrf2 family transcriptional regulators / Iron-sulfur cluster regulator IscR; Stress Response / Stress Response - no subcategory / Flavohaemoglobin / Iron-sulfur cluster regulator IscR	Uncharacterized protein			-0.12	-0.17	-0.03	0.35	0.12	0.16	0.26	-0.03	0.442992	0.220589	0.925481	0.999334	0.988793	0.878598	0.495365
SAOUHSC_01734	5	-	NA	Q2FXU8	Sulfur Metabolism / Organic sulfur assimilation / At5g37530 (CsdL protein family) / Uncharacterized ATPase (AAA family) associated with cysteine desulfurase	Uncharacterized protein	DNA replication [GO:0006260]	K07478;	-0.06	-0.02	0.09	0.22	0.06	0.13	-0.06	0.2	0.745772	0.482949	0.480294	0.999334	0.960104	0.754354	0.979773
SAOUHSC_01735	6	-	NA	Q2FXU7	At5g37530 (CsdL protein family) / HesA/MoeB/ThiF family protein	Uncharacterized protein	cyclic threonylcarbamoyladenosine biosynthetic process [GO:0061504]	K22132;	0.01	0.28	0.11	0.3	-0.01	0.07	0.13	0.28	0.669696	0.0334645	0.228152	0.999334	0.722198	0.84977	0.979773
SAOUHSC_01737	26	aspS	NA	Q2FXU5	Sulfur Metabolism / Organic sulfur assimilation / At5g37530 (CsdL protein family) / Aspartyl-tRNA synthetase (EC 6.1.1.12)	Aspartate--tRNA ligase (EC 6.1.1.12) (Aspartyl-tRNA synthetase) (AspRS)	tRNA aminoacylation for protein translation [GO:0006418]	K01876;	0.04	0.13	-0.02	-0.16	-0.04	0.03	-0.07	-0.24	0.897108	0.068821	0.0324064	0.999334	0.821111	0.971036	0.987719
SAOUHSC_01738	11	hisS	NA	Q2FXU4	Regulation and Cell signaling / Regulation and Cell signaling - no subcategory / Stringent Response, (p)ppGpp metabolism / Histidyl-tRNA synthetase (EC 6.1.1.21)	Histidine--tRNA ligase (EC 6.1.1.21) (Histidyl-tRNA synthetase) (HisRS)	histidyl-tRNA aminoacylation [GO:0006427]	K01892;	0.04	0.11	-0.07	-0.37	-0.04	0.02	-0.4	-0.44	0.469005	0.0108773	0.00968988	0.999334	0.966175	0.397447	0.930908
SAOUHSC_01739	5	lytH	NA	Q2FXU3	LytH protein involved in methicillin resistance / N-acetylmuramoyl-L-alanine amidase (EC 3.5.1.28) domain	Probable cell wall amidase LytH (EC 3.5.1.-)	cell wall organization [GO:0071555]; peptidoglycan catabolic process [GO:0009253]	K01448;	0	-0.35	-0.3	-0.18	0	-0.07	-0.16	-0.08	0.497671	0.042361	0.565856	0.999334	0.431642	0.922089	0.986013
SAOUHSC_01741	3	dtd	NA	Q2FXU2	CBSS-342610.3.peg.283 / D-aminoacyl-tRNA deacylase (EC 3.1.1.96); D-tyrosyl-tRNA(Tyr) deacylase / D-aminoacyl-tRNA deacylase (EC 3.1.1.96); Stringent Response, (p)ppGpp metabolism / D-aminoacyl-tRNA deacylase (EC 3.1.1.96)	D-aminoacyl-tRNA deacylase (DTD) (EC 3.1.1.96) (Gly-tRNA(Ala) deacylase) (EC 3.1.1.-)	tRNA metabolic process [GO:0006399]	K07560;	-0.01	-0.45	-0.56	-0.35	0.01	-0.29	-0.48	-0.34	0.602035	0.0370689	0.00153474	0.999334	0.561626	0.839432	0.979773
SAOUHSC_01742	13	relA	NA	Q2FXU1	CBSS-176299.4.peg.1292 / Guanosine-3',5'-bis(diphosphate) 3'-pyrophosphohydrolase (EC 3.1.7.2) / GTP pyrophosphokinase (EC 2.7.6.5), (p)ppGpp synthetase II; Plastidial (p)ppGpp-mediated response in plants / Guanosine-3',5'-bis(diphosphate) 3'-pyrophosphohydrolase (EC 3.1.7.2) / GTP pyrophosphokinase (EC 2.7.6.5), (p)ppGpp synthetase II; Stringent Response, (p)ppGpp metabolism / Guanosine-3',5'-bi…	GTP pyrophosphokinase (EC 2.7.6.5)	guanosine tetraphosphate metabolic process [GO:0015969]; response to starvation [GO:0042594]	K00951;	0.01	-0.47	-0.11	0.05	-0.01	-0.16	-0.12	0.06	0.101397	0.00798211	0.100218	0.999334	0.0997385	0.96613	0.924306
SAOUHSC_01743	7	apt	NA	Q2FXU0	Nucleosides and Nucleotides / Purines / Purine conversions / Adenine phosphoribosyltransferase (EC 2.4.2.7); Regulation and Cell signaling / Regulation and Cell signaling - no subcategory / cAMP signaling in bacteria / Adenine phosphoribosyltransferase (EC 2.4.2.7); Regulation and Cell signaling / Regulation and Cell signaling - no subcategory / Stringent Response, (p)ppGpp metabolism / Adenine p…	Adenine phosphoribosyltransferase (APRT) (EC 2.4.2.7)	adenine salvage [GO:0006168]; AMP salvage [GO:0044209]; purine ribonucleoside salvage [GO:0006166]	K00759;	-0.01	0.27	0.18	-0.09	0.01	-0.01	-0.32	-0.29	0.416606	0.101661	0.0729904	0.999334	0.564246	0.310163	0.775849
SAOUHSC_01744	6	recJ	NA	Q2FXT9	DNA Metabolism / DNA repair / DNA Repair Base Excision / Single-stranded-DNA-specific exonuclease RecJ (EC 3.1.-.-); DNA Metabolism / DNA repair / DNA repair, bacterial RecFOR pathway / Single-stranded-DNA-specific exonuclease RecJ (EC 3.1.-.-); DNA Metabolism / DNA replication / DNA-replication / Single-stranded-DNA-specific exonuclease RecJ (EC 3.1.-.-)	Uncharacterized protein	DNA recombination [GO:0006310]; DNA repair [GO:0006281]	K07462;	-0.06	0.23	0.12	0.26	0.06	0.14	0.26	-0.71	0.154762	0.321323	0.0230819	0.999334	0.998385	0.935553	0.23812
SAOUHSC_01746	10	secDF	NA	Q2FXT8	Protein translocase subunit SecD / Protein translocase subunit SecF	Multifunctional fusion protein [Includes: Protein translocase subunit SecD; Protein-export membrane protein SecF]	intracellular protein transmembrane transport [GO:0065002]; protein targeting [GO:0006605]; protein transport [GO:0015031]; protein transport by the Sec complex [GO:0043952]	K12257;	0.04	0.18	0.07	0.35	-0.04	0.15	0.03	0.27	0.960598	0.140126	0.067931	0.999334	0.910797	0.977165	0.970543
SAOUHSC_01747	2	yajC	NA	Q2FXT7	Protein translocase subunit YajC	Preprotein translocase, YajC subunit		K03210;	0.03	0.15	0.14	-0.58	-0.03	0.23	-0.31	-0.44	0.422303	0.0179176	0.00624004	0.999334	0.881018	0.40959	0.978326
SAOUHSC_01748	5	tgt	NA	Q2FXT6	RNA Metabolism / RNA processing and modification / Queuosine-Archaeosine Biosynthesis / tRNA guanosine(34) transglycosylase (EC 2.4.2.29)	Queuine tRNA-ribosyltransferase (EC 2.4.2.29) (Guanine insertion enzyme) (tRNA-guanine transglycosylase)	queuosine biosynthetic process [GO:0008616]; tRNA-guanine transglycosylation [GO:0101030]	K00773;	0.08	0.72	0.28	-0.09	-0.08	0.27	-1.39	-1.2	0.24728	0.203119	0.00128904	0.999334	0.809508	0.197102	0.639648
SAOUHSC_01749	9	queA	NA	Q2FXT5	Queuosine-Archaeosine Biosynthesis / tRNA preQ1(34) S-adenosylmethionine ribosyltransferase-isomerase (EC 2.4.99.17)	S-adenosylmethionine:tRNA ribosyltransferase-isomerase (EC 2.4.99.17) (Queuosine biosynthesis protein QueA)	queuosine biosynthetic process [GO:0008616]; tRNA wobble guanine modification [GO:0002099]	K07568;	0.03	0.3	0.05	-0.15	-0.03	0.19	-0.3	-0.63	0.462173	0.0132244	0.00704417	0.999334	0.911789	0.810006	0.413946
SAOUHSC_01750	3	ruvB	NA	Q2FXT4	DNA Metabolism / DNA recombination / RuvABC plus a hypothetical / Holliday junction DNA helicase RuvB; DNA Metabolism / DNA replication / DNA-replication / Holliday junction DNA helicase RuvB	Holliday junction ATP-dependent DNA helicase RuvB (EC 3.6.4.12)	DNA recombination [GO:0006310]; DNA repair [GO:0006281]; SOS response [GO:0009432]	K03551;	0.13	0.48	0.19	-0.88	-0.13	0.09	-0.55	-0.21	0.765386	0.162244	0.365148	0.999334	0.993555	0.976565	0.801035
SAOUHSC_01751	5	ruvA	NA	Q2FXT3	DNA Metabolism / DNA recombination / RuvABC plus a hypothetical / Holliday junction DNA helicase RuvA; DNA Metabolism / DNA replication / DNA-replication / Holliday junction DNA helicase RuvA	Holliday junction ATP-dependent DNA helicase RuvA (EC 3.6.4.12)	DNA recombination [GO:0006310]; DNA repair [GO:0006281]; SOS response [GO:0009432]	K03550;	-0.04	0.1	0.32	0.15	0.04	-0.05	-0.08	-0.16	0.58864	0.108439	0.985689	0.999334	0.892492	0.467703	0.889158
SAOUHSC_01752	2	-	NA	Q2FXT2	ACT domain-containing protein	UPF0735 ACT domain-containing protein SAOUHSC_01752		K06209;	0.03	0.1	0.22	-2.28	-0.03	0.12	-2.14	-2.35	0.115755	0.0123165	0.00256803	0.999334	0.990596	0.127579	0.818339
SAOUHSC_01753	17	obgE	NA	Q2FXT1	Protein Metabolism / Protein biosynthesis / Universal GTPases / GTP-binding protein Obg; CBSS-176279.3.peg.868 / GTP-binding protein Obg	GTPase Obg (EC 3.6.5.-) (GTP-binding protein Obg)		K03979;	0.03	0.44	0.48	0.18	-0.03	0.18	0.19	0.09	0.495137	0.0228803	0.146013	0.999334	0.448952	0.53066	0.970543
SAOUHSC_01755	5	rpmA	NA	Q2FXT0	Protein Metabolism / Protein biosynthesis / Ribosome LSU bacterial / LSU ribosomal protein L27p; CBSS-176279.3.peg.868 / LSU ribosomal protein L27p	50S ribosomal protein L27	translation [GO:0006412]	K02899;	0.06	0.33	0.24	-0.46	-0.06	0.1	-0.16	-0.77	0.942063	0.0433913	0.000944334	0.999334	0.830084	0.971036	0.961092
SAOUHSC_01757	9	rplU	NA	Q2FXS8	Protein Metabolism / Protein biosynthesis / Ribosome LSU bacterial / LSU ribosomal protein L21p; CBSS-176279.3.peg.868 / LSU ribosomal protein L21p	50S ribosomal protein L21	translation [GO:0006412]	K02888;	0	0.6	0.4	-0.02	0	0.21	0.29	-0.22	0.203711	0.00278819	0.00551317	0.999334	0.157506	0.989518	0.779894
SAOUHSC_01759	7	mreC	NA	Q2FXS6	Cell Division and Cell Cycle / Cell Division and Cell Cycle - no subcategory / Bacterial Cytoskeleton / Rod shape-determining protein MreC; Bacterial Cell Division / Rod shape-determining protein MreC; CBSS-354.1.peg.2917 / Rod shape-determining protein MreC	Cell shape-determining protein MreC (Cell shape protein MreC)	regulation of cell shape [GO:0008360]	K03570;	-0.01	-0.1	-0.23	-0.31	0.01	-0.02	-0.28	-0.37	0.975429	0.275971	0.141553	0.999334	0.998728	0.935553	0.924306
SAOUHSC_01761	2	-	NA	Q2FXS4	FIG01108101: hypothetical protein	Uncharacterized protein			0.3	1.2	2.38	4.3	-0.3	0.52	2.62	3.6	0.582701	0.000194752	1.11e-06	0.999334	0.59298	0.945351	0.657427
SAOUHSC_01766	4	folC	SigB	Q2FXR9	Cofactors, Vitamins, Prosthetic Groups, Pigments / Folate and pterines / Folate Biosynthesis / Dihydrofolate synthase (EC 6.3.2.12); Cofactors, Vitamins, Prosthetic Groups, Pigments / Folate and pterines / Folate Biosynthesis / Folylpolyglutamate synthase (EC 6.3.2.17); Virulence, Disease and Defense / Bacteriocins, ribosomally synthesized antibacterial peptides / Colicin V and Bacteriocin Produc…	Folylpolyglutamate synthase/dihydrofolate synthase, putative (EC 6.3.2.17)		K11754;	-0.05	0	-0.31	-0.19	0.05	-0.06	-0.24	-0.75	0.508527	0.412333	0.0317256	0.999334	0.924311	0.944615	0.598202
SAOUHSC_01767	37	valS	NA	Q2FXR8	Valyl-tRNA synthetase (EC 6.1.1.9)	Valine--tRNA ligase (EC 6.1.1.9) (Valyl-tRNA synthetase) (ValRS)	valyl-tRNA aminoacylation [GO:0006438]	K01873;	-0.02	0.05	-0.1	-0.04	0.02	-0.01	0	-0.09	0.434308	0.34357	0.613385	0.999334	0.554948	0.83332	0.814727
SAOUHSC_01768	3	tag	NA	Q2FXR7	DNA Metabolism / DNA repair / DNA Repair Base Excision / DNA-3-methyladenine glycosylase (EC 3.2.2.20)	Uncharacterized protein	base-excision repair [GO:0006284]	K01246;	0.04	-0.42	-0.15	-0.57	-0.04	0.18	-0.13	-0.32	0.244255	0.0564007	0.252112	0.999334	0.285748	0.894727	0.790622
SAOUHSC_01771	14	hemL	NA	Q2FXR4	Cofactors, Vitamins, Prosthetic Groups, Pigments / Tetrapyrroles / CPO analysis / Glutamate-1-semialdehyde 2,1-aminomutase (EC 5.4.3.8); CBSS-196164.1.peg.461 / Glutamate-1-semialdehyde 2,1-aminomutase (EC 5.4.3.8)	Glutamate-1-semialdehyde 2,1-aminomutase 1 (GSA 1) (EC 5.4.3.8) (Glutamate-1-semialdehyde aminotransferase 1) (GSA-AT 1)	protoporphyrinogen IX biosynthetic process [GO:0006782]	K01845;	-0.06	-0.23	-0.24	0.05	0.06	-0.16	-0.13	0.09	0.93224	0.0668083	0.0344681	0.999334	0.991136	0.836747	0.953733
SAOUHSC_01772	12	hemB	NA	Q2FXR3	Cofactors, Vitamins, Prosthetic Groups, Pigments / Tetrapyrroles / CPO analysis / Porphobilinogen synthase (EC 4.2.1.24)	Delta-aminolevulinic acid dehydratase (ALAD) (ALADH) (EC 4.2.1.24) (Porphobilinogen synthase)	heme biosynthetic process [GO:0006783]; protoporphyrinogen IX biosynthetic process [GO:0006782]	K01698;	0.17	-0.2	0.07	0.25	-0.17	-0.14	-0.35	-0.11	0.206491	0.0400612	0.191932	0.999334	0.316117	0.799074	0.979773
SAOUHSC_01774	5	hemC	NA	O34090	Cofactors, Vitamins, Prosthetic Groups, Pigments / Tetrapyrroles / CPO analysis / Porphobilinogen deaminase (EC 2.5.1.61)	Porphobilinogen deaminase (PBG) (EC 2.5.1.61) (Hydroxymethylbilane synthase) (HMBS) (Pre-uroporphyrinogen synthase)	heme biosynthetic process [GO:0006783]; peptidyl-pyrromethane cofactor linkage [GO:0018160]; protoporphyrinogen IX biosynthetic process [GO:0006782]	K01749;	-0.04	-0.2	-0.25	-0.82	0.04	0.31	-1.17	-1.24	0.273171	0.175744	0.0128561	0.999334	0.624129	0.548861	0.852929
SAOUHSC_01777	6	engB	NA	Q2FXQ8	Protein Metabolism / Protein biosynthesis / Universal GTPases / GTP-binding protein EngB	Probable GTP-binding protein EngB	cell cycle [GO:0007049]; cell division [GO:0051301]	K03978;	-0.21	0.3	0.37	0.32	0.21	0.35	-0.39	-0.26	0.0361545	0.390367	0.000680409	0.999334	0.591015	0.0373478	0.197231
SAOUHSC_01778	17	clpX	NA	Q2FXQ7	Protein Metabolism / Protein degradation / Proteasome bacterial / ATP-dependent Clp protease ATP-binding subunit ClpX; Protein Metabolism / Protein degradation / Proteolysis in bacteria, ATP-dependent / ATP-dependent Clp protease ATP-binding subunit ClpX	ATP-dependent Clp protease ATP-binding subunit ClpX	cell division [GO:0051301]; protein catabolic process [GO:0030163]; protein folding [GO:0006457]; proteolysis [GO:0006508]	K03544;	-0.01	-0.03	-0.27	-0.37	0.01	-0.09	-0.19	-0.37	0.661273	0.0807513	0.00186056	0.999334	0.54912	0.942892	0.986013
SAOUHSC_01779	16	tig	NA	Q2FXQ6	Bacterial Cell Division / Cell division trigger factor (EC 5.2.1.8)	Trigger factor (TF) (EC 5.2.1.8) (PPIase)	cell cycle [GO:0007049]; cell division [GO:0051301]; protein folding [GO:0006457]; protein transport [GO:0015031]	K03545;	-0.05	0.3	0.08	0.36	0.05	0.05	0.22	0.25	0.148594	0.0773789	0.0144611	0.999334	0.122895	0.993574	0.900145
SAOUHSC_01781	4	-	NA	Q2FXQ4	FIG01108619: hypothetical protein	Uncharacterized protein			-0.31	-0.03	0.44	1.17	0.31	0.3	-0.28	0.69	0.18717	0.129507	0.0206176	0.999334	0.990596	0.361566	0.293534
SAOUHSC_01782	6	-	NA	Q2FXQ3	Uncharacterized protein YmaB	Uncharacterized protein			0.02	0.16	-0.04	0.43	-0.02	0.08	0.14	0.34	0.790517	0.0747737	0.156127	0.999334	0.989818	0.799074	0.931932
SAOUHSC_01784	5	rplT	SigB	Q2FXQ1	Protein Metabolism / Protein biosynthesis / Ribosome LSU bacterial / LSU ribosomal protein L20p; Virulence / Virulence - no subcategory / Mycobacterium virulence operon involved in protein synthesis (LSU ribosomal proteins) / LSU ribosomal protein L20p	50S ribosomal protein L20	ribosomal large subunit assembly [GO:0000027]; translation [GO:0006412]	K02887;	0.03	0.51	0.16	-0.02	-0.03	0.15	0.23	-0.09	0.277459	0.0379987	0.125827	0.999334	0.295353	0.917311	0.900145
SAOUHSC_01786	5	infC	SigB	Q2FXP9	Protein Metabolism / Protein biosynthesis / Translation initiation factors bacterial / Translation initiation factor 3; Virulence / Virulence - no subcategory / Mycobacterium virulence operon involved in protein synthesis (LSU ribosomal proteins) / Translation initiation factor 3	Translation initiation factor IF-3	ribosome disassembly [GO:0032790]	K02520;	0.09	0.63	0.4	0.04	-0.09	0.43	0.16	-0.03	0.830622	0.00980126	0.125438	0.999334	0.855431	0.875695	0.953391
SAOUHSC_01788	21	thrS	NA	Q2FXP7	Protein Metabolism / Protein biosynthesis / tRNA aminoacylation, Thr / Threonyl-tRNA synthetase (EC 6.1.1.3)	Threonine--tRNA ligase (EC 6.1.1.3) (Threonyl-tRNA synthetase) (ThrRS)	threonyl-tRNA aminoacylation [GO:0006435]	K01868;	0.01	-0.04	0.06	0.23	-0.01	0.08	0.03	0.51	0.553171	0.159841	0.000541156	0.999334	0.620005	0.909975	0.802819
SAOUHSC_01791	7	dnaI	NA	Q2FXP5	DNA Metabolism / DNA replication / DNA-replication / Helicase loader DnaI	Uncharacterized protein	DNA replication initiation [GO:0006270]	K11144;	-0.09	-0.07	0.36	0.06	0.09	-0.07	0.02	-0.01	0.536683	0.174505	0.615318	0.999334	0.925538	0.438635	0.801035
SAOUHSC_01792	2	dnaB	NA	Q2FXP4	Helicase loader DnaB	Uncharacterized protein		K03346;	-0.09	0.28	0.35	0.19	0.09	0.19	0.52	0.7	0.33046	0.314622	0.00851412	0.999334	0.713703	0.751112	0.724917
SAOUHSC_01793	2	nrdR	NA	Q2FXP3	Nucleosides and Nucleotides / Nucleosides and Nucleotides - no subcategory / Ribonucleotide reduction / Ribonucleotide reductase transcriptional regulator NrdR	Transcriptional repressor NrdR	negative regulation of transcription, DNA-templated [GO:0045892]; transcription, DNA-templated [GO:0006351]	K07738;	0.06	0.02	0.05	0.3	-0.06	0.1	-0.85	-2.18	0.280148	0.705813	0.120792	0.999334	0.989818	0.467931	0.441517
SAOUHSC_01795	9	coaE	NA	Q2FXP1	Cofactors, Vitamins, Prosthetic Groups, Pigments / Coenzyme A / Coenzyme A Biosynthesis / Dephospho-CoA kinase (EC 2.7.1.24)	Dephospho-CoA kinase (EC 2.7.1.24) (Dephosphocoenzyme A kinase)	coenzyme A biosynthetic process [GO:0015937]	K00859;	0	-0.01	0.06	0.29	0	0.08	0.32	0.47	0.837898	0.485409	0.00388707	0.999334	0.980332	0.773003	0.818339
SAOUHSC_01796	4	mutM	NA	Q2FXP0	DNA Metabolism / DNA repair / DNA Repair Base Excision / Formamidopyrimidine-DNA glycosylase (EC 3.2.2.23)	Formamidopyrimidine-DNA glycosylase (EC 3.2.2.-) (EC 3.2.2.23) (EC 4.2.99.18)	base-excision repair [GO:0006284]; nucleotide-excision repair [GO:0006289]	K10563;	0	-0.08	-0.05	0.08	0	-0.01	0.04	0.13	0.73869	0.52817	0.327066	0.999334	0.621027	0.987117	0.900145
SAOUHSC_01797	29	polA	NA	Q2FXN9	DNA Metabolism / DNA repair / DNA Repair Base Excision / DNA polymerase I (EC 2.7.7.7); DNA Metabolism / DNA replication / DNA-replication / DNA polymerase I (EC 2.7.7.7)	DNA polymerase I (EC 2.7.7.7)	DNA-dependent DNA replication [GO:0006261]; DNA repair [GO:0006281]	K02335;	-0.01	0.08	0.22	0.3	0.01	0.2	0.1	0.3	0.604072	0.110665	0.0661036	0.999334	0.990596	0.572287	0.924306
SAOUHSC_01800	6	phoP	NA	Q2FXN6	Phosphorus Metabolism / Phosphorus Metabolism - no subcategory / High affinity phosphate transporter and control of PHO regulon / Alkaline phosphatase synthesis transcriptional regulatory protein PhoP; Phosphorus Metabolism / Phosphorus Metabolism - no subcategory / Phosphate metabolism / Alkaline phosphatase synthesis transcriptional regulatory protein PhoP	Two-component response regulator, putative	phosphorelay signal transduction system [GO:0000160]; regulation of transcription, DNA-templated [GO:0006355]; transcription, DNA-templated [GO:0006351]	K07658;	-0.04	-0.2	0.32	0.33	0.04	0.28	0.44	0.56	0.658856	0.0370007	0.0739937	0.999334	0.855431	0.731602	0.997378
SAOUHSC_01801	10	citC	NA	Q2FXN4	Carbohydrates / Central carbohydrate metabolism / TCA Cycle / Isocitrate dehydrogenase [NADP] (EC 1.1.1.42)	Isocitrate dehydrogenase [NADP] (EC 1.1.1.42)	glyoxylate cycle [GO:0006097]; tricarboxylic acid cycle [GO:0006099]	K00031;	0.12	-0.12	0.84	0.89	-0.12	-0.04	0.84	0.66	0.280148	0.00474286	0.000177855	0.999334	0.283584	0.40959	0.96176
SAOUHSC_01802	2	citZ	NA	Q2FXN3	Carbohydrates / Central carbohydrate metabolism / TCA Cycle / Citrate synthase (si) (EC 2.3.3.1); Carbohydrates / One-carbon Metabolism / Serine-glyoxylate cycle / Citrate synthase (si) (EC 2.3.3.1); Respiration / Respiration - no subcategory / Biogenesis of c-type cytochromes / Citrate synthase (si) (EC 2.3.3.1)	Uncharacterized protein	tricarboxylic acid cycle [GO:0006099]	K01647;	-1.59	1.99	2.36	2.13	1.59	1.95	2.45	-0.35	0.0189992	0.0447438	0.00217104	0.0850632	0.120973	0.13834	0.0114845
SAOUHSC_01806	35	pykA	NA	Q2FXM9	Fermentations: Mixed acid / Pyruvate kinase (EC 2.7.1.40) / Phosphohistidine swiveling domain; Glycerate metabolism / Pyruvate kinase (EC 2.7.1.40) / Phosphohistidine swiveling domain; Glycolysis and Gluconeogenesis / Pyruvate kinase (EC 2.7.1.40) / Phosphohistidine swiveling domain; Pyruvate metabolism I: anaplerotic reactions, PEP / Pyruvate kinase (EC 2.7.1.40) / Phosphohistidine swiveling dom…	Pyruvate kinase (PK) (EC 2.7.1.40)	glycolytic process [GO:0006096]	K00873;	-0.03	0.03	-0.1	0.4	0.03	0.06	0.05	0.44	0.899817	0.0379229	0.00116835	0.999334	0.854787	0.995965	0.900145
SAOUHSC_01807	11	pfkA	NA	Q2FXM8	Carbohydrates / Central carbohydrate metabolism / Glycolysis and Gluconeogenesis / 6-phosphofructokinase (EC 2.7.1.11); Carbohydrates / Monosaccharides / D-Tagatose and Galactitol Utilization / 6-phosphofructokinase (EC 2.7.1.11)	ATP-dependent 6-phosphofructokinase (ATP-PFK) (Phosphofructokinase) (EC 2.7.1.11) (Phosphohexokinase)	fructose 6-phosphate metabolic process [GO:0006002]	K00850;	-0.09	0.01	-0.06	0.33	0.09	0.2	-0.05	0.3	0.365064	0.0898465	0.0230819	0.999334	0.967533	0.40959	0.814727
SAOUHSC_01808	11	accA	NA	Q2FXM7	Fatty Acids, Lipids, and Isoprenoids / Fatty acids / Fatty Acid Biosynthesis FASII / Acetyl-coenzyme A carboxyl transferase alpha chain (EC 6.4.1.2)	Acetyl-coenzyme A carboxylase carboxyl transferase subunit alpha (ACCase subunit alpha) (Acetyl-CoA carboxylase carboxyltransferase subunit alpha) (EC 2.1.3.15)	fatty acid biosynthetic process [GO:0006633]; malonyl-CoA biosynthetic process [GO:2001295]	K01962;	0.02	-0.15	-0.11	-0.15	-0.02	-0.01	-0.2	-0.21	0.688841	0.769943	0.132189	0.999334	0.806311	0.820551	0.975938
SAOUHSC_01809	14	accD	NA	Q2FXM6	Fatty Acids, Lipids, and Isoprenoids / Fatty acids / Fatty Acid Biosynthesis FASII / Acetyl-coenzyme A carboxyl transferase beta chain (EC 6.4.1.2); Virulence, Disease and Defense / Bacteriocins, ribosomally synthesized antibacterial peptides / Colicin V and Bacteriocin Production Cluster / Acetyl-coenzyme A carboxyl transferase beta chain (EC 6.4.1.2)	Acetyl-coenzyme A carboxylase carboxyl transferase subunit beta (ACCase subunit beta) (Acetyl-CoA carboxylase carboxyltransferase subunit beta) (EC 2.1.3.15)	fatty acid biosynthetic process [GO:0006633]; malonyl-CoA biosynthetic process [GO:2001295]	K01963;	0	0.08	-0.08	-0.12	0	0	-0.33	-0.27	0.750195	0.284527	0.0321705	0.999334	0.898888	0.600375	0.871858
SAOUHSC_01810	13	-	NA	Q2FXM5	Carbohydrates / Central carbohydrate metabolism / Pyruvate metabolism I: anaplerotic reactions, PEP / NADP-dependent malic enzyme (EC 1.1.1.40)	NADP-dependent malic enzyme, putative		K00027;	0	-0.21	-0.21	-0.09	0	-0.02	-0.25	-0.2	0.306766	0.256164	0.0761128	0.999334	0.40819	0.855552	0.924306
SAOUHSC_01812	4	-	NA	Q2FXM3	RNA Metabolism / RNA processing and modification / RNA processing and degradation, bacterial / FIG146085: 3'-to-5' oligoribonuclease A, Bacillus type; CBSS-138119.3.peg.2719 / FIG146085: 3'-to-5' oligoribonuclease A, Bacillus type	Uncharacterized protein		K06881;	-0.32	0.25	0.66	1.3	0.32	0.34	0.74	1.02	0.497402	0.0352615	0.0252163	0.999334	0.85595	0.522163	0.484972
SAOUHSC_01813	5	-	NA	Q2FXM2	Uncharacterized protein YtoI	Uncharacterized protein			-0.05	0.1	-0.05	0.07	0.05	0.11	-0.3	0.02	0.577638	0.92199	0.281137	0.999334	0.980332	0.564355	0.979773
SAOUHSC_01814	8	uspA2	NA	Q2FXM1	Stress Response / Stress Response - no subcategory / Universal stress protein family / Universal stress protein family	Uncharacterized protein	response to stress [GO:0006950]		-0.01	-0.39	0.47	0.57	0.01	-0.11	0.24	0.29	0.0160809	0.000749598	0.0036845	0.999334	0.393212	0.394454	0.180316
SAOUHSC_01815	3	-	SigB	Q2FXM0	FIG002379: metal-dependent hydrolase	UPF0173 metal-dependent hydrolase SAOUHSC_01815			0.07	-1.02	-0.85	-0.88	-0.07	0.1	-2.47	-3.51	0.129603	0.479936	0.000794691	0.999334	0.989818	0.310163	0.294063
SAOUHSC_01816	4	pepQ	NA	Q2FXL9	Proline dipeptidase (EC 3.4.13.9)	Uncharacterized peptidase SAOUHSC_01816 (EC 3.4.-.-)		K01271;	-0.04	-0.09	0.2	1.23	0.04	0.3	0.03	1.2	0.316559	0.00149039	0.0141398	0.999334	0.692478	0.567383	0.81714
SAOUHSC_01818	11	ald2	NA	Q2FXL7	Carbohydrates / Central carbohydrate metabolism / Pyruvate Alanine Serine Interconversions / Alanine dehydrogenase (EC 1.4.1.1)	Alanine dehydrogenase 2 (EC 1.4.1.1)	L-alanine catabolic process [GO:0042853]	K00259;	0.01	-0.84	0.78	0.21	-0.01	-0.42	0.73	0.22	0.234302	2.86e-05	0.000530312	0.999334	0.285748	0.909975	0.979773
SAOUHSC_01819	7	uspA1	NA	Q2FXL6	Stress Response / Stress Response - no subcategory / Universal stress protein family / Universal stress protein family	Putative universal stress protein SAOUHSC_01819	response to stress [GO:0006950]		0.03	-0.32	2.1	2.35	-0.03	0.35	2.28	2.59	0.101397	6.29e-06	1.15e-07	0.999334	0.0656598	0.935553	0.801035
SAOUHSC_01820	19	ackA	NA	Q2FXL5	Carbohydrates / Central carbohydrate metabolism / Pyruvate metabolism II: acetyl-CoA, acetogenesis from pyruvate / Acetate kinase (EC 2.7.2.1); Carbohydrates / Fermentation / Fermentations: Lactate / Acetate kinase (EC 2.7.2.1); Carbohydrates / Fermentation / Fermentations: Mixed acid / Acetate kinase (EC 2.7.2.1); CBSS-257314.1.peg.752 / Acetate kinase (EC 2.7.2.1)	Acetate kinase (EC 2.7.2.1) (Acetokinase)	acetyl-CoA biosynthetic process [GO:0006085]; organic acid metabolic process [GO:0006082]	K00925;	0	0.21	0.22	-0.38	0	0.33	-0.03	-0.3	0.176009	0.00772618	0.000432853	0.999334	0.494167	0.457943	0.96176
SAOUHSC_01821	4	-	NA	Q2FXL4	CBSS-257314.1.peg.752 / Adenine-specific methyltransferase (EC 2.1.1.72)	Uncharacterized protein	DNA methylation [GO:0006306]	K00571;	0	0.29	0.19	-0.23	0	0.29	0.06	-0.23	0.932451	0.360037	0.0015911	0.999334	0.991136	0.894727	0.947117
SAOUHSC_01822	4	tpx	NA	Q2FXL3	Sulfur Metabolism / Sulfur Metabolism - no subcategory / Thioredoxin-disulfide reductase / Thiol peroxidase, Tpx-type (EC 1.11.1.15); CBSS-257314.1.peg.752 / Thiol peroxidase, Tpx-type (EC 1.11.1.15)	Thiol peroxidase (Tpx) (EC 1.11.1.15) (Peroxiredoxin tpx) (Prx) (Thioredoxin peroxidase)	cell redox homeostasis [GO:0045454]	K11065;	0	-0.04	-0.14	0.05	0	0.02	0.03	0.02	0.706388	0.463173	0.967605	0.999334	0.849627	0.894727	0.890796
SAOUHSC_01824	10	thiI	NA	Q2FXL1	Cofactors, Vitamins, Prosthetic Groups, Pigments / Cofactors, Vitamins, Prosthetic Groups, Pigments - no subcategory / Thiamin biosynthesis / tRNA S(4)U 4-thiouridine synthase (former ThiI)	Probable tRNA sulfurtransferase (EC 2.8.1.4) (Sulfur carrier protein ThiS sulfurtransferase) (Thiamine biosynthesis protein ThiI) (tRNA 4-thiouridine synthase)	thiamine biosynthetic process [GO:0009228]; thiamine diphosphate biosynthetic process [GO:0009229]; tRNA thio-modification [GO:0034227]	K03151;	0.05	0.53	0.33	-0.05	-0.05	0.09	-0.5	-0.47	0.223021	0.0584647	0.0412804	0.999334	0.33811	0.168312	0.741125
SAOUHSC_01825	4	-	NA	Q2FXL0	Amino Acids and Derivatives / Alanine, serine, and glycine / Alanine biosynthesis / Cysteine desulfurase (EC 2.8.1.7); RNA Metabolism / RNA processing and modification / tRNA modification Archaea / Cysteine desulfurase (EC 2.8.1.7); CBSS-393130.3.peg.794 / Cysteine desulfurase (EC 2.8.1.7); CBSS-84588.1.peg.1247 / Cysteine desulfurase (EC 2.8.1.7)	Uncharacterized protein		K04487;	-0.06	0.41	0.15	0.06	0.06	0.1	-1.51	-0.33	0.134038	0.103574	0.0103444	0.999334	0.657698	0.107818	0.829773
SAOUHSC_01827	16	ezrA	NA	Q2FXK8	Cell Division and Cell Cycle / Cell Division and Cell Cycle - no subcategory / Control of cell elongation - division cycle in Bacilli / Septation ring formation regulator EzrA; CBSS-393130.3.peg.794 / Septation ring formation regulator EzrA	Septation ring formation regulator EzrA	cell cycle [GO:0007049]; cell division [GO:0051301]; positive regulation of cell division [GO:0051781]; septin ring assembly [GO:0000921]	K06286;	0.03	0.06	0.12	-0.24	-0.03	0.08	-0.07	-0.34	0.488636	0.100072	0.0114017	0.999334	0.6628	0.771421	0.927183
SAOUHSC_01828	3	-	NA	Q2FXK7	CBSS-393130.3.peg.794 / Free methionine-(R)-sulfoxide reductase, contains GAF domain	GAF domain protein		K08968;	0.15	-0.56	-0.18	0.44	-0.15	-0.29	-0.3	0.45	0.378928	0.0233431	0.0149309	0.999334	0.33811	0.983471	0.931932
SAOUHSC_01829	13	rpsD	NA	Q2FXK6	Protein Metabolism / Protein biosynthesis / Ribosome SSU bacterial / SSU ribosomal protein S4p (S9e); CBSS-393130.3.peg.794 / SSU ribosomal protein S4p (S9e); CBSS-393130.3.peg.794 / SSU ribosomal protein S4p (S9e), zinc-independent	30S ribosomal protein S4	positive regulation of translational fidelity [GO:0045903]; translation [GO:0006412]	K02986;	-0.01	0.59	0.31	-0.02	0.01	0.15	0.19	-0.31	0.149901	0.00590923	0.00480532	0.999334	0.0807003	0.501741	0.658988
SAOUHSC_01832	2	-	CodY	Q2FXK2	Amino Acids and Derivatives / Alanine, serine, and glycine / Serine Biosynthesis / Phosphoserine aminotransferase, putative (EC 2.6.1.52)	Uncharacterized protein	glycine biosynthetic process, by transamination of glyoxylate [GO:0019265]		-0.19	-1.69	2.25	2.79	0.19	0.18	1.31	3.38	0.538364	0.00173893	0.000315573	0.999334	0.662796	0.794039	0.997385
SAOUHSC_01833	5	serA	CodY	Q2FXK1	Amino Acids and Derivatives / Alanine, serine, and glycine / Glycine and Serine Utilization / D-3-phosphoglycerate dehydrogenase (EC 1.1.1.95); Amino Acids and Derivatives / Alanine, serine, and glycine / Serine Biosynthesis / D-3-phosphoglycerate dehydrogenase (EC 1.1.1.95); Cofactors, Vitamins, Prosthetic Groups, Pigments / Pyridoxine / Pyridoxin (Vitamin B6) Biosynthesis / D-3-phosphoglycerate…	D-3-phosphoglycerate dehydrogenase (EC 1.1.1.95)	L-serine biosynthetic process [GO:0006564]	K00058;	-0.18	-0.59	1.92	3.47	0.18	0.8	1.37	3.27	0.0187305	0.000279961	3.76e-05	0.999334	0.0286476	0.883211	0.961092
SAOUHSC_01836	4	ptaA	NA	Q2FXJ8	Chitin and N-acetylglucosamine utilization / PTS system, N-acetylglucosamine-specific IIB component (EC 2.7.1.69) / PTS system, N-acetylglucosamine-specific IIC component; Sialic Acid Metabolism / PTS system, N-acetylglucosamine-specific IIB component (EC 2.7.1.69) / PTS system, N-acetylglucosamine-specific IIC component	Uncharacterized protein	phosphoenolpyruvate-dependent sugar phosphotransferase system [GO:0009401]	K02803;K02804;	-0.06	0.2	-0.2	-0.86	0.06	0.58	-0.61	-3.67	0.27041	0.017823	0.00499605	0.999334	0.980332	0.914506	0.370741
SAOUHSC_01837	3	-	NA	Q2FXJ7	Glycerolipid and Glycerophospholipid Metabolism in Bacteria / Acyl-ACP:1-acyl-sn-glycerol-3-phosphate acyltransferase (EC 2.3.1.n4); Phosphate metabolism / Acyl-ACP:1-acyl-sn-glycerol-3-phosphate acyltransferase (EC 2.3.1.n4)	1-acyl-sn-glycerol-3-phosphate acyltransferases domain protein (EC 2.3.1.51)	metabolic process [GO:0008152]	K00655;	0.05	-0.13	-0.23	-0.18	-0.05	0.07	0.18	-0.37	0.112809	0.368759	0.0390301	0.999334	0.434838	0.188067	0.910615
SAOUHSC_01838	8	htrA1	NA	Q2FXJ6	Serine protease, DegP/HtrA, do-like (EC 3.4.21.-)	Uncharacterized protein			-0.03	-0.29	0.28	2.93	0.03	-0.08	0.74	2.81	0.597353	5.17e-05	2.64e-07	0.999334	0.890606	0.836747	0.818339
SAOUHSC_01839	19	tyrS	NA	Q2FXJ5	Tyrosyl-tRNA synthetase (EC 6.1.1.1)	Tyrosine--tRNA ligase (EC 6.1.1.1) (Tyrosyl-tRNA synthetase) (TyrRS)	tRNA aminoacylation [GO:0043039]; tyrosyl-tRNA aminoacylation [GO:0006437]	K01866;	-0.04	-0.11	-0.15	0.01	0.04	0.06	-0.08	0	0.81586	0.284052	0.381943	0.999334	0.815603	0.971036	0.964497
SAOUHSC_01845	17	fhs	NA	Q2G296	Carbohydrates / One-carbon Metabolism / One-carbon metabolism by tetrahydropterines / Formate--tetrahydrofolate ligase (EC 6.3.4.3); Carbohydrates / One-carbon Metabolism / Serine-glyoxylate cycle / Formate--tetrahydrofolate ligase (EC 6.3.4.3); Cofactors, Vitamins, Prosthetic Groups, Pigments / Folate and pterines / Folate Biosynthesis / Formate--tetrahydrofolate ligase (EC 6.3.4.3); Miscellaneo…	Formate--tetrahydrofolate ligase (EC 6.3.4.3) (Formyltetrahydrofolate synthetase) (FHS) (FTHFS)	10-formyltetrahydrofolate biosynthetic process [GO:0009257]; purine nucleobase biosynthetic process [GO:0009113]; tetrahydrofolate interconversion [GO:0035999]	K01938;	-0.01	-0.37	0.06	1.08	0.01	-0.15	0.13	0.29	0.240515	0.0354238	0.373396	0.999334	0.60943	0.810006	0.61828
SAOUHSC_01846	8	acsA	CodY	Q2G294	Carbohydrates / Central carbohydrate metabolism / Pyruvate metabolism II: acetyl-CoA, acetogenesis from pyruvate / Acetyl-coenzyme A synthetase (EC 6.2.1.1)	Acetyl-CoA synthetase, putative	metabolic process [GO:0008152]	K01895;	0.11	-0.46	6.33	5.22	-0.11	0.57	6.29	5.71	0.599157	3.06e-07	1.67e-07	0.999334	0.531587	0.967866	0.780224
SAOUHSC_01850	16	ccpA	NA	Q2G295	Regulation and Cell signaling / Regulation and Cell signaling - no subcategory / HPr catabolite repression system / Catabolite control protein A	Catabolite control protein A	negative regulation of transcription, DNA-templated [GO:0045892]; transcription, DNA-templated [GO:0006351]	K02529;	0.02	0.11	0.13	0.44	-0.02	-0.08	-0.06	0.13	0.583793	0.180166	0.099452	0.999334	0.497071	0.502852	0.790622
SAOUHSC_01852	8	aroA2	NA	Q2G248	Chorismate Synthesis / Chorismate mutase I (EC 5.4.99.5) / 2-keto-3-deoxy-D-arabino-heptulosonate-7-phosphate synthase I beta (EC 2.5.1.54); Common Pathway For Synthesis of Aromatic Compounds (DAHP synthase to chorismate) / Chorismate mutase I (EC 5.4.99.5) / 2-keto-3-deoxy-D-arabino-heptulosonate-7-phosphate synthase I beta (EC 2.5.1.54); Phenylalanine and Tyrosine Branches from Chorismate / Cho…	Uncharacterized protein	aromatic amino acid family biosynthetic process [GO:0009073]; chorismate metabolic process [GO:0046417]	K13853;	0.03	-0.46	0.13	0.65	-0.03	-0.09	0.03	0.48	0.0256694	0.000372674	0.00080746	0.999334	0.0436077	0.886994	0.924306
SAOUHSC_01854	21	-	SigB	Q2G245	Maebl	Uncharacterized protein			-0.01	-0.56	-0.33	-0.36	0.01	-0.5	-0.09	-0.32	0.853373	0.0421599	0.00408287	0.999334	0.892232	0.699562	0.902562
SAOUHSC_01855	9	-	SigB	Q2G247	UPF0478 protein YtxG	UPF0478 protein SAOUHSC_01855			0.04	-0.8	-0.31	-0.57	-0.04	-0.3	-0.02	-0.3	0.101397	0.00447613	0.0113058	0.999334	0.0436077	0.502852	0.336694
SAOUHSC_01856	10	murC	SigB	Q2FXJ0	Cell Wall and Capsule / Cell Wall and Capsule - no subcategory / Peptidoglycan Biosynthesis / UDP-N-acetylmuramate--alanine ligase (EC 6.3.2.8); Cell Wall and Capsule / Cell Wall and Capsule - no subcategory / Peptidoglycan biosynthesis--gjo / UDP-N-acetylmuramate--alanine ligase (EC 6.3.2.8); cell division cluster containing FtsQ / UDP-N-acetylmuramate--alanine ligase (EC 6.3.2.8)	UDP-N-acetylmuramate--L-alanine ligase (EC 6.3.2.8) (UDP-N-acetylmuramoyl-L-alanine synthetase)	cell cycle [GO:0007049]; cell division [GO:0051301]; cell wall organization [GO:0071555]; peptidoglycan biosynthetic process [GO:0009252]; regulation of cell shape [GO:0008360]	K01924;	-0.03	0.19	-0.2	-0.13	0.03	0.18	-0.07	-0.18	0.871207	0.0647957	0.0416576	0.999334	0.931025	0.801422	0.986013
SAOUHSC_01857	21	-	SigB	Q2FXI9	Cell Division and Cell Cycle / Cell Division and Cell Cycle - no subcategory / Bacterial Cytoskeleton / Cell division protein FtsK; Bacterial Cell Division / Cell division protein FtsK; Bacterial RNA-metabolizing Zn-dependent hydrolases / Cell division protein FtsK	Uncharacterized protein		K03466;	0.01	-0.11	-0.22	-0.15	-0.01	-0.15	-0.56	-0.48	0.134038	0.201964	0.00166547	0.999334	0.980332	0.155182	0.388653
SAOUHSC_01858	9	-	SigB	Q2FXI8	Phenylalanyl-tRNA synthetase domain protein (Bsu YtpR)	Phenylalanine--tRNA ligase beta subunit (EC 6.1.1.20)	phenylalanyl-tRNA aminoacylation [GO:0006432]	K06878;	0	0.1	-0.11	-0.01	0	-0.07	-0.05	-0.06	0.533054	0.517629	0.901837	0.999334	0.609186	0.836747	0.979773
SAOUHSC_01859	10	-	NA	Q2FXI7	CPO analysis / FIG002434: Uncharacterized protein YtpQ	UPF0354 protein SAOUHSC_01859			-0.07	-0.06	-0.23	-0.09	0.07	-0.2	-0.37	-0.26	0.579808	0.219021	0.0613664	0.999334	0.767732	0.452072	0.764861
SAOUHSC_01860	6	-	NA	Q2FXI6	FIG009688: Thioredoxin	Uncharacterized protein	cell redox homeostasis [GO:0045454]; cellular response to oxidative stress [GO:0034599]; glycerol ether metabolic process [GO:0006662]		-0.02	-0.45	-0.35	-0.78	0.02	-0.17	-0.54	-0.74	0.650049	0.0185523	0.0174448	0.999334	0.662796	0.894727	0.924703
SAOUHSC_01863	2	-	NA	Q2FXI4	Hypothetical protein MW1689	Uncharacterized protein			-0.11	-0.76	0	0.35	0.11	-0.1	0.02	-0.5	0.0713102	0.0490189	0.0993811	0.999334	0.649292	0.941757	0.235019
SAOUHSC_01865	2	trmB	NA	Q2FXI2	tRNA (guanine46-N7-)-methyltransferase (EC 2.1.1.33)	tRNA (guanine-N(7)-)-methyltransferase (EC 2.1.1.33) (tRNA (guanine(46)-N(7))-methyltransferase) (tRNA(m7G46)-methyltransferase)	RNA (guanine-N7)-methylation [GO:0036265]	K03439;	0.18	0.13	0.21	-0.11	-0.18	0.25	-0.22	-0.48	0.29523	0.343703	0.00871112	0.999334	0.394472	0.794039	0.934847
SAOUHSC_01867	13	dat	NA	Q2FXI0	Carbohydrates / Central carbohydrate metabolism / Pyruvate Alanine Serine Interconversions / D-alanine aminotransferase (EC 2.6.1.21)	D-alanine aminotransferase (EC 2.6.1.21)	D-amino acid metabolic process [GO:0046416]	K00824;	0.05	-0.03	0.08	1.11	-0.05	-0.04	0.21	0.9	0.361714	0.000503706	1.87e-05	0.999334	0.601604	0.475733	0.931932
SAOUHSC_01868	19	-	NA	Q2FXH9	Putative Xaa-His dipeptidase	Putative dipeptidase SAOUHSC_01868 (EC 3.4.13.-)		K01439;	-0.03	-0.18	0.09	0.85	0.03	0.17	0.36	0.86	0.33046	0.00147912	0.000180002	0.999334	0.374768	0.875275	0.903706
SAOUHSC_01869	7	-	SigB	Q2FXH8	Hypothetical protein SAV1752	Uncharacterized protein			0.05	-0.96	-0.48	-0.72	-0.05	-0.72	-0.09	-0.47	0.344032	0.0221109	0.000241757	0.999334	0.405247	0.320122	0.413946
SAOUHSC_01870	2	-	NA	Q2FXH7	Pseudouridine Metabolism / Ribosomal small subunit pseudouridine synthase A (EC 5.4.99.19)	Pseudouridine synthase (EC 5.4.99.-)	enzyme-directed rRNA pseudouridine synthesis [GO:0000455]	K06183;	0.05	-0.05	-0.06	-0.51	-0.05	0.16	-0.35	-1.76	0.438159	0.949336	0.0276151	0.999334	0.990596	0.697548	0.526972
SAOUHSC_01871	3	-	NA	Q2FXH6	Teichoic and lipoteichoic acids biosynthesis / Probable cell division protein YtgP	Polysaccharide biosynthesis protein, putative			-0.08	-0.23	-0.51	-0.27	0.08	0.07	-0.1	-0.41	0.469005	0.697684	0.0137696	0.941518	0.648928	0.711189	0.401993
SAOUHSC_01875	19	leuS	NA	Q2FXH2	Leucyl-tRNA synthetase (EC 6.1.1.4)	Leucine--tRNA ligase (EC 6.1.1.4) (Leucyl-tRNA synthetase) (LeuRS)	leucyl-tRNA aminoacylation [GO:0006429]	K01869;	-0.02	-0.09	-0.2	-0.02	0.02	-0.07	-0.26	-0.01	0.587735	0.165513	0.0119766	0.999334	0.990596	0.536706	0.977138
SAOUHSC_01877	3	-	NA	Q2FXH0	Uncharacterized radical SAM protein YtqA	Uncharacterized protein		K07139;	0.03	0.11	-0.84	-0.55	-0.03	-0.32	-1.08	-0.07	0.165423	0.0770409	0.00349971	0.999334	0.546049	0.622632	0.60932
SAOUHSC_01879	3	rot	AgrA/RNAIII	Q9RFJ6	Repressor of toxins Rot	HTH-type transcriptional regulator rot (Repressor of toxins)	pathogenesis [GO:0009405]; regulation of transcription, DNA-templated [GO:0006355]; transcription, DNA-templated [GO:0006351]	K20338;	-0.29	1.54	1.2	0.39	0.29	1.85	0.72	0.2	0.149901	0.0141343	0.00336373	0.494764	0.225769	0.115572	0.320408
SAOUHSC_01882	6	-	NA	Q2FXG5	Fatty Acids, Lipids, and Isoprenoids / Triacylglycerols / Triacylglycerol metabolism / Lysophospholipase (EC 3.1.1.5); Fatty Acids, Lipids, and Isoprenoids / Triacylglycerols / Triacylglycerol metabolism / Monoglyceride lipase (EC 3.1.1.23)	Uncharacterized protein	lipid metabolic process [GO:0006629]		0	-0.25	-0.24	0.2	0	-0.06	-0.78	0.2	0.275938	0.3179	0.0289129	0.999334	0.855279	0.39043	0.997378
SAOUHSC_01884	6	putA	NA	Q2FXG3	Amino Acids and Derivatives / Proline and 4-hydroxyproline / Proline, 4-hydroxyproline uptake and utilization / Proline dehydrogenase (EC 1.5.99.8) (Proline oxidase); Respiration / Electron donating reactions / Respiratory dehydrogenases 1 / Proline dehydrogenase (EC 1.5.99.8) (Proline oxidase)	Uncharacterized protein	proline catabolic process to glutamate [GO:0010133]	K00318;	0.03	-0.63	3.65	3	-0.03	-0.45	3.06	2.59	0.191358	2.86e-05	4.75e-07	0.999334	0.821548	0.449828	0.449244
SAOUHSC_01886	4	ribH	NA	Q2FXG2	Cofactors, Vitamins, Prosthetic Groups, Pigments / Riboflavin, FMN, FAD / Riboflavin, FMN and FAD metabolism Extended / 6,7-dimethyl-8-ribityllumazine synthase (EC 2.5.1.78)	6,7-dimethyl-8-ribityllumazine synthase (DMRL synthase) (LS) (Lumazine synthase) (EC 2.5.1.78)	riboflavin biosynthetic process [GO:0009231]	K00794;	-0.01	-0.22	-0.06	0.59	0.01	-0.14	0	0.35	0.805979	0.0368982	0.0141398	0.999334	0.718531	0.979206	0.992907
SAOUHSC_01887	5	ribA	NA	Q2FXG1	Folate Biosynthesis / 3,4-dihydroxy-2-butanone 4-phosphate synthase (EC 4.1.99.12) / GTP cyclohydrolase II (EC 3.5.4.25); Molybdenum cofactor biosynthesis / 3,4-dihydroxy-2-butanone 4-phosphate synthase (EC 4.1.99.12) / GTP cyclohydrolase II (EC 3.5.4.25); riboflavin to FAD / 3,4-dihydroxy-2-butanone 4-phosphate synthase (EC 4.1.99.12) / GTP cyclohydrolase II (EC 3.5.4.25); Riboflavin, FMN and FA…	Riboflavin biosynthesis protein RibBA [Includes: GTP cyclohydrolase-2 (EC 3.5.4.25) (GTP cyclohydrolase II); 3,4-dihydroxy-2-butanone 4-phosphate synthase (DHBP synthase) (EC 4.1.99.12)]	riboflavin biosynthetic process [GO:0009231]	K14652;	-0.02	-0.22	-1.81	-0.54	0.02	-0.13	-0.01	-0.44	0.101397	0.00968408	0.353562	0.999334	0.990596	0.127579	0.997378
SAOUHSC_01895	10	-	NA	Q2FXF4	Autolysin (EC 3.5.1.28)	Uncharacterized protein			-0.03	-0.19	0.01	0.05	0.03	-0.1	0	0.07	0.999614	0.880882	0.981029	0.999334	0.990596	0.990387	0.997385
SAOUHSC_01901	10	tal	NA	Q2FXE8	Carbohydrates / Central carbohydrate metabolism / Pentose phosphate pathway / Transaldolase (EC 2.2.1.2); Carbohydrates / Monosaccharides / Fructose utilization / Transaldolase (EC 2.2.1.2)	Transaldolase (EC 2.2.1.2)	carbohydrate metabolic process [GO:0005975]; pentose-phosphate shunt [GO:0006098]	K00616;	0.02	0.01	0.01	0.67	-0.02	0.18	0.22	0.95	0.431015	0.00468289	5.59e-05	0.999334	0.675533	0.935553	0.413946
SAOUHSC_01907	7	-	NA	Q2FXE2	Carbohydrates / Monosaccharides / D-gluconate and ketogluconates metabolism / oxidoreductase of aldo/keto reductase family, subgroup 1	Uncharacterized protein			0	-0.21	0.46	1.04	0	0.27	0.69	1.05	0.434884	0.0029189	0.00110276	0.999334	0.324689	0.877115	0.931932
SAOUHSC_01908	13	-	NA	Q2G1W5	Hypothetical protein SAV1789	Uncharacterized protein			-0.03	0.07	-0.09	0.22	0.03	0.08	-0.22	0.06	0.719872	0.071416	0.286897	0.999334	0.877884	0.807581	0.657427
SAOUHSC_01909	16	metK	NA	Q2G1W4	Amino Acids and Derivatives / Lysine, threonine, methionine, and cysteine / Methionine Biosynthesis / S-adenosylmethionine synthetase (EC 2.5.1.6); Amino Acids and Derivatives / Lysine, threonine, methionine, and cysteine / Methionine Degradation / S-adenosylmethionine synthetase (EC 2.5.1.6); Cofactors, Vitamins, Prosthetic Groups, Pigments / Folate and pterines / Folate Biosynthesis / S-adenosy…	S-adenosylmethionine synthase (AdoMet synthase) (EC 2.5.1.6) (MAT) (Methionine adenosyltransferase)	one-carbon metabolic process [GO:0006730]; S-adenosylmethionine biosynthetic process [GO:0006556]	K00789;	0.01	0.07	0.13	0.47	-0.01	0	-0.07	0.2	0.289914	0.0188094	0.201412	0.999334	0.780489	0.522163	0.294063
SAOUHSC_01910	7	pckA	NA	Q2G1W2	Carbohydrates / Central carbohydrate metabolism / Pyruvate metabolism I: anaplerotic reactions, PEP / Phosphoenolpyruvate carboxykinase [ATP] (EC 4.1.1.49); Carbohydrates / One-carbon Metabolism / Serine-glyoxylate cycle / Phosphoenolpyruvate carboxykinase [ATP] (EC 4.1.1.49)	Phosphoenolpyruvate carboxykinase (ATP) (PCK) (PEP carboxykinase) (PEPCK) (EC 4.1.1.49)	gluconeogenesis [GO:0006094]	K01610;	0.06	-0.9	0.29	1.44	-0.06	-0.52	1.46	2.06	0.101397	0.000816725	1.29e-07	0.999334	0.361027	0.0718544	0.293534
SAOUHSC_01933	2	hsdM2	NA	Q2FXD0	DNA Metabolism / DNA Metabolism - no subcategory / Restriction-Modification System / Type I restriction-modification system, DNA-methyltransferase subunit M (EC 2.1.1.72); DNA Metabolism / DNA Metabolism - no subcategory / Type I Restriction-Modification / Type I restriction-modification system, DNA-methyltransferase subunit M (EC 2.1.1.72)	Type I restriction-modification system, M subunit (EC 2.1.1.-)	DNA restriction-modification system [GO:0009307]	K03427;	-0.07	0.02	-0.18	0.19	0.07	-0.01	-1.92	-0.09	0.0408584	0.726847	0.00219093	0.999334	0.809596	0.0387772	0.890796
SAOUHSC_01958	3	-	NA	Q2FXA7	Cofactors, Vitamins, Prosthetic Groups, Pigments / Tetrapyrroles / CPO analysis / Hypothetical protein SAV1831	Uncharacterized protein		K07002;	-0.01	-0.03	-0.2	0.63	0.01	-0.13	-0.99	0.6	0.26028	0.0346061	0.00355626	0.999334	0.879217	0.386443	0.970112
SAOUHSC_01960	2	hemY	PerR	Q2FXA5	Cofactors, Vitamins, Prosthetic Groups, Pigments / Tetrapyrroles / CPO analysis / Protoporphyrinogen IX oxidase, aerobic, HemY (EC 1.3.3.4)	Protoporphyrinogen oxidase (EC 1.3.3.4)	protoporphyrinogen IX biosynthetic process [GO:0006782]	K00231;	-0.1	-0.51	-0.08	0.05	0.1	-0.13	0.03	-0.24	0.470584	0.0575781	0.512572	0.999334	0.955612	0.742386	0.617683
SAOUHSC_01961	5	hemH	PerR	Q2FXA4	Biogenesis of c-type cytochromes / Coproporphyrin ferrochelatase (EC 4.99.1.-); CPO analysis / Coproporphyrin ferrochelatase (EC 4.99.1.-)	Ferrochelatase (EC 4.99.1.1) (Heme synthase) (Protoheme ferro-lyase)	heme biosynthetic process [GO:0006783]	K01772;	0.13	-0.46	-0.07	-0.53	-0.13	-0.09	-0.27	-0.43	0.474843	0.18734	0.25363	0.999334	0.405571	0.979206	0.910615
SAOUHSC_01962	7	hemE	PerR	Q2FXA3	Cofactors, Vitamins, Prosthetic Groups, Pigments / Tetrapyrroles / CPO analysis / Uroporphyrinogen III decarboxylase (EC 4.1.1.37)	Uroporphyrinogen decarboxylase (UPD) (URO-D) (EC 4.1.1.37)	heme biosynthetic process [GO:0006783]; protoporphyrinogen IX biosynthetic process [GO:0006782]	K01599;	-0.14	0.06	0.12	0.03	0.14	0	0.06	0.31	0.202167	0.253774	0.0301507	0.999334	0.285748	0.217946	0.903706
SAOUHSC_01964	6	traP	NA	Q2G2F3	Cofactors, Vitamins, Prosthetic Groups, Pigments / Tetrapyrroles / CPO analysis / Uncharacterized protein, homolog of B.subtilis yhgC	Signal transduction protein TRAP (Target of RNAIII-activating protein)	pathogenesis [GO:0009405]		-0.04	-0.45	0.31	0.65	0.04	-0.38	0.05	0.15	0.624492	0.0384887	0.477686	0.999334	0.990596	0.820551	0.71512
SAOUHSC_01966	5	-	NA	Q2G2F2	Membrane Transport / Protein translocation across cytoplasmic membrane / EcsAB transporter affecting expression and secretion of secretory preproteins / ABC transporter, permease protein EscB	Uncharacterized protein		K01992;	-0.65	1.05	0.67	1.23	0.65	0.07	0.36	1.31	0.0266448	0.00631295	0.112148	0.0786638	0.00951718	0.107818	0.197231
SAOUHSC_01967	2	-	NA	Q2G2F1	Membrane Transport / Protein translocation across cytoplasmic membrane / EcsAB transporter affecting expression and secretion of secretory preproteins / ABC transporter, ATP-binding protein EcsA	ABC transporter, ATP-binding protein, putative		K01990;	0.13	0.08	1.8	2.63	-0.13	0.47	0.69	2.9	0.133733	0.00024474	4.56e-06	0.999334	0.76978	0.358183	0.775849
SAOUHSC_01968	5	hit	NA	Q2G2F0	CBSS-176279.3.peg.1262 / Histidine triad (HIT) nucleotide-binding protein, similarity with At5g48545 and yeast YDL125C (HNT1)	Uncharacterized protein		K02503;	-0.08	-0.21	0.54	0.72	0.08	-0.01	0.58	0.81	0.355073	0.000588149	0.000584	0.999334	0.459436	0.795609	0.997385
SAOUHSC_01969	5	-	SigB	Q2G2T0	Membrane Transport / Protein translocation across cytoplasmic membrane / EcsAB transporter affecting expression and secretion of secretory preproteins / Hypothetical protein SAV1839; CBSS-176279.3.peg.1262 / Hypothetical protein SAV1839	Uncharacterized protein			0.1	-1.42	0.32	-0.07	-0.1	-0.22	0.31	0.03	0.00376978	0.000432609	0.00651272	0.999334	0.00430096	0.935553	0.889158
SAOUHSC_01972	16	prsA	VraSR	Q2G2S6	Membrane Transport / Protein translocation across cytoplasmic membrane / EcsAB transporter affecting expression and secretion of secretory preproteins / Foldase protein PrsA precursor (EC 5.2.1.8); Protein Metabolism / Protein folding / Peptidyl-prolyl cis-trans isomerase / Foldase protein PrsA precursor (EC 5.2.1.8); CBSS-176279.3.peg.1262 / Foldase clustered with pyrimidine conversion	Foldase protein PrsA (EC 5.2.1.8)		K07533;	-0.02	-0.03	0.35	2.92	0.02	0.1	0.48	2.77	0.756271	3.38e-05	2.08e-08	0.999334	0.892018	0.993574	0.871723
SAOUHSC_01973	5	cbf1	NA	Q2G2T1	3'->5' exoribonuclease Bsu YhaM	Uncharacterized protein		K03698;	-0.86	1.08	0.97	0.98	0.86	1.02	0.95	0.4	0.367109	0.124698	0.373396	0.520751	0.362795	0.394454	0.413946
SAOUHSC_01974	19	-	NA	Q2G2S8	DNA double-strand break repair rad50 ATPase	Uncharacterized protein			0.04	-0.12	-0.14	0.13	-0.04	0.04	-0.42	0.07	0.581033	0.129507	0.125786	0.999334	0.830084	0.699562	0.932358
SAOUHSC_01975	13	-	NA	Q2G2S7	DNA Metabolism / DNA repair / DNA repair, bacterial / DNA repair exonuclease family protein YhaO	Uncharacterized protein		K03547;	-0.01	-0.07	-0.11	-0.26	0.01	0.1	-0.27	0	0.409367	0.162244	0.214528	0.999334	0.446587	0.971036	0.495728
SAOUHSC_01977	9	-	NA	Q2FXA0	UPF0342 protein YheA	UPF0342 protein SAOUHSC_01977			0.04	-0.02	-0.03	0.36	-0.04	0.07	0.36	0.38	0.587276	0.388605	0.0240116	0.999334	0.960822	0.475256	0.910615
SAOUHSC_01979	7	-	NA	Q2FX98	HTH domain protein SA1665, binds to mecA promoter region	Uncharacterized protein			0.02	0.61	-1.99	-1.64	-0.02	0.17	-2.29	-1.46	0.240294	1.31e-05	4.54e-06	0.999334	0.410008	0.715759	0.801035
SAOUHSC_01980	2	-	NA	Q2FX97	Two-component system response regulator protein	DNA-binding response regulator, putative	phosphorelay signal transduction system [GO:0000160]; regulation of transcription, DNA-templated [GO:0006355]; transcription, DNA-templated [GO:0006351]	K02479;	-0.04	-2.22	0.28	-1.34	0.04	0.12	-0.86	-1.36	0.101397	0.068821	0.0216206	0.999334	0.324689	0.476624	0.80916
SAOUHSC_01982	11	-	NA	Q2FX95	Protein Metabolism / Protein biosynthesis / Ribosome biogenesis bacterial / Similar to ribosomal large subunit pseudouridine synthase D, Bacillus subtilis YhcT type	Ribosomal large subunit pseudouridine synthase, RluD subfamily, putative (EC 4.2.1.70)	enzyme-directed rRNA pseudouridine synthesis [GO:0000455]	K06180;	0.08	0.11	0.03	0.49	-0.08	-0.03	0.13	0.52	0.95716	0.0846183	0.0125283	0.999334	0.879217	0.883211	0.903729
SAOUHSC_01983	9	fumC	NA	Q2FX94	Carbohydrates / Central carbohydrate metabolism / TCA Cycle / Fumarate hydratase class II (EC 4.2.1.2)	Fumarate hydratase class II (Fumarase C) (EC 4.2.1.2) (Aerobic fumarase) (Iron-independent fumarase)	fumarate metabolic process [GO:0006106]; malate metabolic process [GO:0006108]; tricarboxylic acid cycle [GO:0006099]	K01679;	0.13	-0.29	0.78	0.65	-0.13	-0.03	1.07	0.88	0.234302	0.0039586	4.37e-05	0.999334	0.232587	0.21824	0.450099
SAOUHSC_01987	15	-	SigB	Q2FX90	Hypothetical protein SAV1854	Uncharacterized protein	N-acetylglucosamine metabolic process [GO:0006044]		0.12	-0.51	0.03	-0.46	-0.12	-0.3	0.14	-0.28	0.161245	0.0141407	0.0131104	0.999334	0.112953	0.553553	0.307826
SAOUHSC_01988	3	cspR	NA	Q2FX89	Glutaredoxins / tRNA (cytidine(34)-2'-O)-methyltransferase (EC 2.1.1.207)	Putative tRNA (cytidine(34)-2'-O)-methyltransferase (EC 2.1.1.207) (tRNA (cytidine/uridine-2'-O-)-methyltransferase)		K03216;	0	-0.09	-0.32	-0.23	0	0.06	-0.27	-0.06	0.866781	0.498154	0.264315	0.999334	0.990596	0.828436	0.970543
SAOUHSC_01997	2	perR	PerR	Q2G282	Stress Response / Oxidative stress / Oxidative stress / Peroxide stress regulator PerR, FUR family; Putative hemin transporter / Peroxide stress regulator PerR, FUR family	Peroxide-responsive repressor PerR	transcription, DNA-templated [GO:0006351]	K09825;	0.09	-0.13	0.28	1.09	-0.09	0.19	0.51	0.58	0.769103	0.713006	0.0379286	0.999334	0.605992	0.828951	0.852166
SAOUHSC_01998	6	-	PerR	Q2G281	Phosphoglycerate dehydrogenase and related dehydrogenases	Uncharacterized protein			-0.14	-0.35	-0.04	0.12	0.14	0.06	-0.22	0.59	0.33046	0.419986	0.00320732	0.999334	0.821548	0.329816	0.997385
SAOUHSC_01999	6	-	PerR	Q2G280	Sulfur Metabolism / Sulfur Metabolism - no subcategory / Thioredoxin-disulfide reductase / Thiol peroxidase, Bcp-type (EC 1.11.1.15)	Uncharacterized protein	cell redox homeostasis [GO:0045454]	K03564;	0	-0.32	-0.09	0.7	0	-0.02	0.07	0.8	0.536683	0.00796439	3.54e-05	0.999334	0.443579	0.971036	0.979773
SAOUHSC_02000	15	gsaB	NA	Q2G283	Cofactors, Vitamins, Prosthetic Groups, Pigments / Tetrapyrroles / CPO analysis / Glutamate-1-semialdehyde 2,1-aminomutase (EC 5.4.3.8); CBSS-196164.1.peg.461 / Glutamate-1-semialdehyde 2,1-aminomutase (EC 5.4.3.8)	Glutamate-1-semialdehyde 2,1-aminomutase 2 (GSA 2) (EC 5.4.3.8) (Glutamate-1-semialdehyde aminotransferase 2) (GSA-AT 2)	protoporphyrinogen IX biosynthetic process [GO:0006782]	K01845;	0	-0.08	0.01	0.42	0	0.01	0.16	0.5	0.947375	0.0150363	0.00339409	0.999334	0.971505	0.894727	0.889158
SAOUHSC_02004	2	-	NA	Q2G2M8	CBSS-261594.1.peg.788 / Cysteinyl-tRNA synthetase related protein	UPF0374 protein SAOUHSC_02004		K07586;	-0.06	-0.02	0.09	0.23	0.06	0	0.19	0.25	0.991159	0.227675	0.150583	0.999334	0.989044	0.946462	0.996537
SAOUHSC_02009	3	-	NA	Q2G2H3	Cell Wall and Capsule / Gram-Positive cell wall components / Teichoic and lipoteichoic acids biosynthesis / Teichoic acid export ATP-binding protein TagH (EC 3.6.3.40); CBSS-176280.1.peg.1561 / Teichoic acid export ATP-binding protein TagH (EC 3.6.3.40)	Uncharacterized protein		K09693;	-0.15	-0.34	-0.4	-0.43	0.15	-0.03	-0.13	-0.49	0.887434	0.354274	0.482542	0.999334	0.990596	0.886994	0.890796
SAOUHSC_02010	3	-	NA	Q2G2H0	CBSS-176280.1.peg.1561 / Transcription regulator CDS_ID OB0894; CBSS-261594.1.peg.788 / Transcription regulator CDS_ID OB0894	Uncharacterized protein			-0.03	-0.56	-0.92	-1.14	0.03	-0.01	-1.67	-2.11	0.472833	0.0447614	0.00631469	0.999334	0.729018	0.699562	0.891338
SAOUHSC_02013	4	-	SigB	P0A0K3	CBSS-176280.1.peg.1561 / Intracellular protease	Uncharacterized protein SAOUHSC_02013 (ORF1)		K05520;	0.09	-1.26	-0.86	-2.07	-0.09	-1.21	-0.7	-1.82	0.778358	0.000182619	9.68e-07	0.999334	0.692478	0.894727	0.799133
SAOUHSC_02014	2	-	NA	Q2G2H1	CBSS-176280.1.peg.1561 / Hypothetical protein FIG009695	Uncharacterized protein			-0.39	0.17	0.46	0.17	0.39	0.25	0.11	0.37	0.361714	0.187605	0.353562	0.955691	0.402905	0.310163	0.801035
SAOUHSC_02084	7	-	NA	Q2FX22	Phage repressor	Phage repressor protein, putative			-0.09	-0.21	0.26	0.02	0.09	0.1	0.2	-0.16	0.486903	0.365892	0.3371	0.999334	0.938878	0.875695	0.60932
SAOUHSC_02086	2	-	NA	Q2FX20	Phage protein	PV83 orf 4-like protein-related protein			-0.01	0.32	-0.95	-0.39	0.01	0.34	-0.57	-0.51	0.816731	0.256484	0.386687	0.999334	0.990596	0.909975	0.889158
SAOUHSC_02087	2	-	NA	Q2FX19	Phage protein	Conserved hypothetical phage protein			-0.16	-2.04	0.04	0.05	0.16	-0.75	-0.57	-0.16	0.0803144	0.0141407	0.212032	0.999334	0.157506	0.597208	0.975938
SAOUHSC_02092	19	ampS	NA	Q2FX14	Protein Metabolism / Protein degradation / EC 3.4.11.- Aminopeptidases / Aminopeptidase S (Leu, Val, Phe, Tyr preference) (EC 3.4.11.24); CBSS-176280.1.peg.1561 / Aminopeptidase S (Leu, Val, Phe, Tyr preference) (EC 3.4.11.24)	Aminopeptidase PepS, putative (EC 3.4.11.-)		K19689;	0	-0.17	-0.1	-0.28	0	-0.11	-0.32	-0.17	0.133733	0.18324	0.0133856	0.999334	0.633374	0.394454	0.801035
SAOUHSC_02093	4	-	NA	Q2FX13	CBSS-176280.1.peg.1561 / Hypothetical protein YfkK; LMPTP YfkJ cluster / Hypothetical protein YfkK	UPF0435 protein SAOUHSC_02093			0.02	-0.12	-0.54	-1.53	-0.02	-0.31	-0.41	-1.04	0.101397	0.00189555	3.23e-06	0.999334	0.990596	0.699562	0.180316
SAOUHSC_02096	2	-	SigB	Q2FX11	CBSS-176280.1.peg.1561 / FIG010063: hypothetical protein	Uncharacterized protein			-0.01	-1.87	-0.37	-0.52	0.01	-0.29	-0.35	-1.21	0.00263775	0.000391769	0.00498413	0.999334	0.0272453	0.935553	0.307826
SAOUHSC_02097	5	-	SigB	Q2FX10	RNA Metabolism / RNA processing and modification / tRNA processing / Ribonuclease BN (EC 3.1.-.-); CBSS-176280.1.peg.1561 / Ribonuclease BN (EC 3.1.-.-); CBSS-342610.3.peg.283 / Ribonuclease BN (EC 3.1.-.-); LMPTP YfkJ cluster / Ribonuclease BN (EC 3.1.-.-)	Uncharacterized protein		K07058;	0.06	-0.96	-0.63	-1.33	-0.06	-0.59	-0.6	-1.4	0.354268	0.000892469	1.29e-05	0.999334	0.225769	0.715855	0.801035
SAOUHSC_02098	10	vraR	VraSR	Q2FX09	CBSS-176280.1.peg.1561 / Two component transcriptional regulator VraR	DNA-binding response regulator VraR, putative	phosphorelay signal transduction system [GO:0000160]; regulation of transcription, DNA-templated [GO:0006355]; transcription, DNA-templated [GO:0006351]	K07694;	-0.11	-0.15	0.41	1.87	0.11	0.09	0.32	1.69	0.18696	3.95e-05	5.26e-06	0.999334	0.990596	0.467931	0.307209
SAOUHSC_02099	2	vraS	VraSR	Q2FX08	CBSS-176280.1.peg.1561 / Sensor histidine kinase VraS	Sensor protein VraS (EC 2.7.13.3)		K07681;	0.01	-0.26	0.09	1.89	-0.01	-0.11	-0.02	1.64	0.581033	1.54e-05	6.08e-05	0.999334	0.806068	0.894727	0.814727
SAOUHSC_02102	6	map	NA	Q2FX05	Protein Metabolism / Protein biosynthesis / Translation termination factors bacterial / Methionine aminopeptidase (EC 3.4.11.18); Protein Metabolism / Protein degradation / EC 3.4.11.- Aminopeptidases / Methionine aminopeptidase (EC 3.4.11.18); CBSS-312309.3.peg.1965 / Methionine aminopeptidase (EC 3.4.11.18)	Methionine aminopeptidase (MAP) (MetAP) (EC 3.4.11.18) (Peptidase M)	protein initiator methionine removal [GO:0070084]	K01265;	0	-0.03	-0.19	-0.01	0	0.03	-0.05	0.29	0.223021	0.84838	0.019444	0.999334	0.435324	0.894727	0.285088
SAOUHSC_02106	3	gatD	NA	Q2FX00	Putative amidotransferase similar to cobyric acid synthase	Uncharacterized protein	cobalamin biosynthetic process [GO:0009236]; glutamine metabolic process [GO:0006541]	K07009;	-0.05	0.14	0.28	-0.15	0.05	0.14	-0.13	-0.03	0.507984	0.109568	0.711393	0.999334	0.697755	0.40959	0.931932
SAOUHSC_02107	13	murT	NA	Q2FWZ9	proposed amino acid ligase found clustered with an amidotransferase	UDP-N-acetylmuramyl tripeptide synthetase, putative	biosynthetic process [GO:0009058]		0.05	0	-0.05	-0.18	-0.05	-0.1	-0.11	-0.3	0.782285	0.40495	0.252908	0.999334	0.990596	0.83835	0.902562
SAOUHSC_02108	8	ftnA	Fur , PerR	Q2FWZ8	Ferritin-like protein 2	Bacterial non-heme ferritin (EC 1.16.3.2)	intracellular sequestering of iron ion [GO:0006880]; iron ion transport [GO:0006826]	K02217;	0.01	-0.67	-0.15	-0.28	-0.01	-0.85	-0.67	-0.14	0.511515	0.00133195	0.0377214	0.999334	0.993555	0.61133	0.889158
SAOUHSC_02113	2	rumA	NA	Q2FWZ3	RNA methyltransferase, TrmA family	RNA methyltransferase, TrmA family, putative	RNA processing [GO:0006396]	K03215;	-0.17	0.49	0.54	0.46	0.17	0.42	0.7	0.49	0.525423	0.0252097	0.0324064	0.999334	0.380895	0.883211	0.910615
SAOUHSC_02114	5	-	NA	Q2FWZ2	Diacylglycerol kinase, Bacillus type (EC 2.7.1.107)	Diacylglycerol kinase (DAG kinase) (DAGK) (EC 2.7.1.107)	phospholipid biosynthetic process [GO:0008654]	K07029;	-0.04	-0.25	0.07	-0.09	0.04	0.07	-0.49	0.13	0.277459	0.423043	0.194766	0.999334	0.855431	0.476624	0.852929
SAOUHSC_02116	22	gatB	NA	Q2FWZ0	Protein Metabolism / Protein biosynthesis / tRNA aminoacylation, Glu and Gln / Glutamyl-tRNA(Gln) amidotransferase subunit B (EC 6.3.5.7); tRNA aminoacylation, Glu and Gln / Aspartyl-tRNA(Asn) amidotransferase subunit B (EC 6.3.5.6)	Aspartyl/glutamyl-tRNA(Asn/Gln) amidotransferase subunit B (Asp/Glu-ADT subunit B) (EC 6.3.5.-)	glutaminyl-tRNAGln biosynthesis via transamidation [GO:0070681]; translation [GO:0006412]	K02434;	-0.01	0.07	0	0.18	0.01	0.08	-0.02	0.18	0.667618	0.489181	0.0412804	0.999334	0.906133	0.828436	0.883313
SAOUHSC_02117	21	gatA	NA	Q2FWY9	Protein Metabolism / Protein biosynthesis / tRNA aminoacylation, Glu and Gln / Glutamyl-tRNA(Gln) amidotransferase subunit A (EC 6.3.5.7); tRNA aminoacylation, Glu and Gln / Aspartyl-tRNA(Asn) amidotransferase subunit A (EC 6.3.5.6)	Glutamyl-tRNA(Gln) amidotransferase subunit A (Glu-ADT subunit A) (EC 6.3.5.7)	translation [GO:0006412]	K02433;	0.03	0.05	-0.05	0.11	-0.03	-0.02	-0.11	0.05	0.892833	0.362614	0.181335	0.999334	0.967533	0.908207	0.924306
SAOUHSC_02118	7	gatC	NA	Q2FWY8	Protein Metabolism / Protein biosynthesis / tRNA aminoacylation, Glu and Gln / Glutamyl-tRNA(Gln) amidotransferase subunit C (EC 6.3.5.7); tRNA aminoacylation, Glu and Gln / Aspartyl-tRNA(Asn) amidotransferase subunit C (EC 6.3.5.6)	Aspartyl/glutamyl-tRNA(Asn/Gln) amidotransferase subunit C (Asp/Glu-ADT subunit C) (EC 6.3.5.-)	regulation of translational fidelity [GO:0006450]; translation [GO:0006412]	K02435;	-0.07	0.01	0.07	0.16	0.07	-0.11	-0.04	0.32	0.131427	0.113351	0.0089537	0.999334	0.32331	0.256744	0.931932
SAOUHSC_02121	12	-	NA	Q2FWY6	Regulation and Cell signaling / Regulation and Cell signaling - no subcategory / Sex pheromones in Enterococcus faecalis and other Firmicutes / Putative pheromone cAM373 precursor lipoprotein CamS	Uncharacterized protein			-0.02	-0.07	-0.38	-0.04	0.02	-0.22	-0.25	-0.12	0.277459	0.0354238	0.109709	0.999334	0.585628	0.600375	0.890796
SAOUHSC_02122	19	ligA	NA	Q2G1Y0	DNA Metabolism / DNA repair / DNA Repair Base Excision / DNA ligase (EC 6.5.1.2); CBSS-393121.3.peg.1913 / DNA ligase (EC 6.5.1.2)	DNA ligase (EC 6.5.1.2) (Polydeoxyribonucleotide synthase [NAD(+)])	base-excision repair, DNA ligation [GO:0006288]; DNA replication [GO:0006260]	K01972;	-0.02	0.07	-0.14	-0.23	0.02	-0.1	-0.29	-0.26	0.56923	0.112018	0.0216206	0.999334	0.531587	0.467931	0.814727
SAOUHSC_02123	24	pcrA	NA	Q53727	DNA Metabolism / DNA repair / DNA repair, bacterial UvrD and related helicases / ATP-dependent DNA helicase UvrD/PcrA; CBSS-393121.3.peg.1913 / ATP-dependent DNA helicase UvrD/PcrA	ATP-dependent DNA helicase PcrA (EC 3.6.4.12)	DNA unwinding involved in DNA replication [GO:0006268]	K03657;	0.01	0.18	-0.2	-0.46	-0.01	-0.01	-0.27	-0.62	0.602035	0.00228199	0.000472107	0.999334	0.477284	0.807581	0.69745
SAOUHSC_02125	2	hisR	NA	Q2G1Y1	CBSS-393121.3.peg.1913 / His repressor	Uncharacterized protein			0	-0.32	-0.44	-0.62	0	-0.07	-0.18	-0.34	0.792437	0.0773789	0.061944	0.999334	0.662796	0.794039	0.801035
SAOUHSC_02126	25	purB	NA	Q2G2S0	Nucleosides and Nucleotides / Purines / De Novo Purine Biosynthesis / Adenylosuccinate lyase (EC 4.3.2.2); Nucleosides and Nucleotides / Purines / Purine conversions / Adenylosuccinate lyase (EC 4.3.2.2); De Novo Purine Biosynthesis / SAICAR lyase (EC 4.3.2.2)	Adenylosuccinate lyase (ASL) (EC 4.3.2.2) (Adenylosuccinase) (ASase)	'de novo' AMP biosynthetic process [GO:0044208]; 'de novo' IMP biosynthetic process [GO:0006189]	K01756;	-0.01	-0.21	-0.47	-0.47	0.01	0.05	-0.36	-0.49	0.448459	0.0128204	0.000142234	0.999334	0.388207	0.954632	0.992907
SAOUHSC_02132	15	nadE	NA	Q2G236	Cofactors, Vitamins, Prosthetic Groups, Pigments / NAD and NADP / NAD and NADP cofactor biosynthesis global / NAD synthetase (EC 6.3.1.5)	NH(3)-dependent NAD(+) synthetase (EC 6.3.1.5)	NAD biosynthetic process [GO:0009435]	K01916;	-0.04	-0.15	-0.16	0.19	0.04	0.07	0.01	0.28	0.680968	0.0630129	0.0229966	0.999334	0.731499	0.992154	0.903706
SAOUHSC_02133	14	-	NA	Q2G235	Cofactors, Vitamins, Prosthetic Groups, Pigments / NAD and NADP / NAD and NADP cofactor biosynthesis global / Nicotinate phosphoribosyltransferase (EC 2.4.2.11); Stress Response / Oxidative stress / Redox-dependent regulation of nucleus processes / Nicotinate phosphoribosyltransferase (EC 2.4.2.11)	Nicotinate phosphoribosyltransferase (EC 6.3.4.21)	NAD biosynthetic process [GO:0009435]; nicotinate nucleotide salvage [GO:0019358]	K00763;	-0.01	-0.15	-0.17	0.26	0.01	0.15	-0.24	0.3	0.113269	0.0855987	0.000746058	0.999334	0.198185	0.69911	0.889158
SAOUHSC_02134	4	nos	NA	Q2G234	Nitrogen Metabolism / Nitrogen Metabolism - no subcategory / Nitric oxide synthase / Nitric oxide synthase oxygenase (EC 1.-.-.-)	Nitric oxide synthase oxygenase (EC 1.14.14.47)	nitric oxide biosynthetic process [GO:0006809]	K00491;	-0.21	-0.04	-0.85	0.74	0.21	0.62	-0.02	1.15	0.750195	0.188857	0.0404849	0.999334	0.990596	0.805471	0.903831
SAOUHSC_02139	3	-	NA	Q2FWY2	Cofactors, Vitamins, Prosthetic Groups, Pigments / NAD and NADP / NAD and NADP cofactor biosynthesis global / Nicotinamidase (EC 3.5.1.19); Stress Response / Oxidative stress / Redox-dependent regulation of nucleus processes / Nicotinamidase (EC 3.5.1.19)	Pyrazinamidase/nicotinamidase, putative (EC 3.5.1.-)	uracil catabolic process [GO:0006212]		-0.02	-0.07	-2.11	-1.54	0.02	-0.32	-1.74	-1.63	0.792789	2.04e-05	0.00164032	0.999334	0.892492	0.883211	0.910615
SAOUHSC_02140	14	ppaC	NA	Q2FWY1	Phosphorus Metabolism / Phosphorus Metabolism - no subcategory / Phosphate metabolism / Manganese-dependent inorganic pyrophosphatase (EC 3.6.1.1)	Probable manganese-dependent inorganic pyrophosphatase (EC 3.6.1.1) (Pyrophosphate phospho-hydrolase) (PPase)		K15986;	0.02	-0.15	-0.11	0.29	-0.02	-0.01	-0.03	0.14	0.648909	0.177252	0.401683	0.999334	0.731373	0.909975	0.900145
SAOUHSC_02142	10	aldH	NA	Q2FWX9	Carbohydrates / Central carbohydrate metabolism / Methylglyoxal Metabolism / Aldehyde dehydrogenase (EC 1.2.1.3); Carbohydrates / Central carbohydrate metabolism / Pyruvate metabolism II: acetyl-CoA, acetogenesis from pyruvate / Aldehyde dehydrogenase (EC 1.2.1.3); Fatty Acids, Lipids, and Isoprenoids / Phospholipids / Glycerolipid and Glycerophospholipid Metabolism in Bacteria / Aldehyde dehydro…	4,4'-diaponeurosporen-aldehyde dehydrogenase (EC 1.2.1.-) (4,4'-diaponeurosporenal dehydrogenase)	cellular aldehyde metabolic process [GO:0006081]	K00128;	0.09	-0.47	-0.17	0.65	-0.09	-0.14	-0.28	0.74	0.275938	0.000892469	0.000412068	0.999334	0.28348	0.944615	0.8542
SAOUHSC_02143	10	-	NA	Q2FWX8	Carbohydrates / Central carbohydrate metabolism / Pentose phosphate pathway / 6-phosphogluconolactonase (EC 3.1.1.31); Carbohydrates / One-carbon Metabolism / Formaldehyde assimilation: Ribulose monophosphate pathway / 6-phosphogluconolactonase (EC 3.1.1.31)	Uncharacterized protein SAOUHSC_02143			0.04	-0.2	-0.21	0.1	-0.04	-0.15	-0.06	-0.01	0.602035	0.283161	0.474157	0.999334	0.89674	0.735302	0.889158
SAOUHSC_02145	2	-	SigB	Q2FWX6	FIG01108203: hypothetical protein	Uncharacterized protein			0.03	-0.9	-1.1	-0.73	-0.03	-0.32	-0.41	-0.08	0.830622	0.225883	0.155585	0.999334	0.675128	0.894727	0.889158
SAOUHSC_02150	9	-	NA	Q2FWX1	Thioredoxin	Uncharacterized protein			0	-0.7	0.28	0.99	0	-0.37	0.59	0.95	0.0380475	2.36e-05	1.19e-06	0.999334	0.112953	0.197102	0.889158
SAOUHSC_02151	2	pmtD	NA	Q2FWX0	FIG01108144: hypothetical protein	Uncharacterized protein	transmembrane transport [GO:0055085]	K01992;	0.01	-0.65	0.46	0.23	-0.01	-0.17	0.77	0.25	0.602035	0.0977255	0.00348727	0.999334	0.501108	0.864048	0.69745
SAOUHSC_02152	8	pmtC	NA	Q2FWW9	Bacitracin Stress Response / ABC transporter, ATP-binding protein	ABC transporter, ATP-binding protein, putative		K01990;	0.01	-0.7	0.29	0.38	-0.01	-0.26	0.44	0.28	0.438714	0.00106877	0.038728	0.999334	0.446587	0.958842	0.924306
SAOUHSC_02158	12	-	NA	Q2FWW3	Amino Acids and Derivatives / Glutamine, glutamate, aspartate, asparagine; ammonia assimilation / Glutamine, Glutamate, Aspartate and Asparagine Biosynthesis / Aspartate aminotransferase (EC 2.6.1.1); Amino Acids and Derivatives / Lysine, threonine, methionine, and cysteine / Threonine and Homoserine Biosynthesis / Aspartate aminotransferase (EC 2.6.1.1); Amino Acids and Derivatives / Proline and…	Uncharacterized protein	biosynthetic process [GO:0009058]		0	-0.13	-0.05	-0.15	0	-0.18	-0.02	-0.14	0.990653	0.494798	0.576465	0.999334	0.990596	0.909975	0.979773
SAOUHSC_02218	4	-	NA	Q2FWR2	Arginine Biosynthesis extended / hypothetical protein	Conserved hypothetical phage protein			0.06	0.1	-0.01	0.48	-0.06	0.1	0.12	0.56	0.778358	0.150173	0.0124771	0.999334	0.867664	0.745054	0.746225
SAOUHSC_02232	3	-	NA	Q2FWP9	phi PVL orf 33-like protein	Phi PVL orf 33-like protein			0	-0.03	-0.1	-0.22	0	0.05	-0.54	-0.17	0.602035	0.626255	0.0858473	0.999334	0.993555	0.537745	0.979773
SAOUHSC_02235	5	-	NA	Q2FWP6	Phage repressor	Repressor			-0.03	-0.1	0.13	0.31	0.03	-0.03	-0.24	-0.45	0.202395	0.132415	0.352377	0.999334	0.991136	0.53066	0.293534
SAOUHSC_02241	2	lukG	SaeSR	Q2FWP0	Cytolytic pore-forming protein => Leukocidin LukF-G	Uncharacterized leukocidin-like protein 1	cytolysis in other organism [GO:0051715]; pathogenesis [GO:0009405]	K11038;	-0.09	0.07	0.74	5.99	0.09	1.27	1.93	5.93	0.488636	5.17e-05	3.17e-05	0.999334	0.501108	0.605778	0.987719
SAOUHSC_02243	5	lukH	SaeSR	Q2FWN9	Leukocidin LukS-H	Uncharacterized leukocidin-like protein 2	cytolysis in other organism [GO:0051715]; pathogenesis [GO:0009405]	K11038;	-1.15	0.47	-1.06	6.96	1.15	1.86	0.17	6.66	0.367109	9.65e-05	1.65e-06	0.753567	0.910474	0.820551	0.487963
SAOUHSC_02254	26	groEL	CtsR	Q2FWN4	Phages, Prophages, Transposable elements, Plasmids / Pathogenicity islands / Staphylococcal pathogenicity islands SaPI / Heat shock protein 60 family chaperone GroEL; Protein Metabolism / Protein folding / GroEL GroES / Heat shock protein 60 family chaperone GroEL	60 kDa chaperonin (GroEL protein) (Protein Cpn60)	'de novo' protein folding [GO:0006458]; chaperone-mediated protein folding [GO:0061077]; protein refolding [GO:0042026]	K04077;	0.04	0.03	-0.32	-0.14	-0.04	-0.2	-0.45	-0.19	0.58298	0.0523818	0.00480151	0.999334	0.40819	0.820551	0.903706
SAOUHSC_02255	5	groES	CtsR	Q2FWN3	Protein Metabolism / Protein folding / GroEL GroES / Heat shock protein 60 family co-chaperone GroES	10 kDa chaperonin (GroES protein) (Protein Cpn10)	chaperone cofactor-dependent protein refolding [GO:0051085]; response to unfolded protein [GO:0006986]	K04078;	0.08	0.04	-0.31	-0.26	-0.08	-0.14	-0.48	-0.22	0.987828	0.0753237	0.0315284	0.999334	0.99928	0.989518	0.953733
SAOUHSC_02258	5	-	NA	Q2FWN0	Nitroreductase family protein	Uncharacterized protein	cellular response to oxidative stress [GO:0034599]	K07078;	-0.09	0.2	0.4	-1.02	0.09	0.14	-0.09	-1.08	0.340369	0.000493757	0.00153726	0.999334	0.910797	0.34372	0.487963
SAOUHSC_02259	4	-	NA	Q2FWM9	Omega amidase, Nit2 homolog (EC 3.5.1.3)	Uncharacterized protein	nitrogen compound metabolic process [GO:0006807]	K13566;	0.03	-0.53	0.11	0.37	-0.03	-0.1	-0.06	0.14	0.134038	0.00639731	0.809496	0.999334	0.353199	0.901545	0.621228
SAOUHSC_02264	2	agrC	CodY , AgrA	Q2FWM5	Histidine kinase of the competence regulon ComD	Accessory gene regulator protein C	phosphorelay signal transduction system [GO:0000160]	K07706;	0.04	-0.94	-0.46	0.07	-0.04	-0.13	-0.56	-1.92	0.0158634	0.0707013	0.00259205	0.999334	0.33811	0.995234	0.169803
SAOUHSC_02265	8	agrA	CodY , AgrA	Q2FWM4	Response regulator of the competence regulon ComE	Accessory gene regulator protein A	phosphorelay signal transduction system [GO:0000160]; regulation of transcription, DNA-templated [GO:0006355]; transcription, DNA-templated [GO:0006351]	K07707;	0.05	-1.05	0.22	0.49	-0.05	-0.13	0.32	0.3	0.0393825	8.12e-05	0.152567	0.999334	0.023359	0.799074	0.889158
SAOUHSC_02267	3	-	NA	Q2FWM2	Carbohydrates / Di- and oligosaccharides / Sucrose utilization / Fructokinase (EC 2.7.1.4); Carbohydrates / Monosaccharides / Fructose utilization / Fructokinase (EC 2.7.1.4); Carbohydrates / Sugar alcohols / Mannitol Utilization / Fructokinase (EC 2.7.1.4)	Fructokinase, putative		K00847;	0	-0.52	-0.25	0.39	0	-0.06	-0.46	0.34	0.1989	0.0145731	0.0440813	0.999334	0.241495	0.875275	0.947117
SAOUHSC_02268	11	scrB	NA	Q2FWM1	Carbohydrates / Di- and oligosaccharides / Sucrose utilization / Sucrose-6-phosphate hydrolase (EC 3.2.1.B3)	Sucrose-6-phosphate hydrolase (EC 3.2.1.26) (Invertase)	sucrose metabolic process [GO:0005985]	K01193;	-0.06	-0.45	-0.26	0.12	0.06	-0.27	-0.3	0.15	0.581092	0.00835022	0.0015486	0.999334	0.656558	0.845857	0.997385
SAOUHSC_02273	11	rex	NA	Q2FWL6	Oxidative stress / Redox-sensing transcriptional repressor Rex	Redox-sensing transcriptional repressor Rex	negative regulation of transcription, DNA-templated [GO:0045892]; response to redox state [GO:0051775]; transcription, DNA-templated [GO:0006351]	K01926;	0.07	0.08	0.15	0.54	-0.07	-0.09	0.15	0.5	0.474843	0.0201165	0.00200444	0.999334	0.719228	0.730036	0.890796
SAOUHSC_02274	5	vga	NA	Q2FWL5	CBSS-393121.3.peg.2760 / ABC transporter ATP-binding protein uup	ABC transporter, ATP-binding protein, putative		K06158;	-0.02	0.05	0.15	-0.04	0.02	0.08	0.08	0.24	0.613363	0.28812	0.614294	0.999334	0.98385	0.901545	0.741125
SAOUHSC_02277	8	gcp	NA	Q2FWL2	Cell Division and Cell Cycle / Cell Division and Cell Cycle - no subcategory / YgjD and YeaZ / TsaD/Kae1/Qri7 protein, required for threonylcarbamoyladenosine t(6)A37 formation in tRNA; RNA Metabolism / RNA processing and modification / YrdC-YciO / TsaD/Kae1/Qri7 protein, required for threonylcarbamoyladenosine t(6)A37 formation in tRNA; RNA Metabolism / RNA processing and modification / YrdC-Yci…	tRNA N6-adenosine threonylcarbamoyltransferase (EC 2.3.1.234) (N6-L-threonylcarbamoyladenine synthase) (t(6)A synthase) (t(6)A37 threonylcarbamoyladenosine biosynthesis protein TsaD) (tRNA threonylcarbamoyladenosine biosynthesis protein TsaD)	tRNA threonylcarbamoyladenosine modification [GO:0002949]	K01409;	0.02	0	-0.14	-0.22	-0.02	-0.06	-0.11	-0.15	0.826478	0.305438	0.249542	0.999334	0.843026	0.909975	0.978326
SAOUHSC_02279	3	-	NA	Q2FWL0	Cell Division and Cell Cycle / Cell Division and Cell Cycle - no subcategory / YgjD and YeaZ / TsaB protein, required for threonylcarbamoyladenosine (t(6)A) formation in tRNA; Cell Wall and Capsule / Cell Wall and Capsule - no subcategory / YjeE / TsaB protein, required for threonylcarbamoyladenosine (t(6)A) formation in tRNA; Protein Metabolism / Protein biosynthesis / Ribosome biogenesis bacter…	Uncharacterized protein	tRNA threonylcarbamoyladenosine modification [GO:0002949]		0	-0.23	-0.44	-0.07	0	-0.21	-0.75	-1	0.0841217	0.0708519	0.00320698	0.999334	0.99928	0.778234	0.166417
SAOUHSC_02280	3	-	NA	Q2FWK9	Cell Wall and Capsule / Cell Wall and Capsule - no subcategory / YjeE / TsaE protein, required for threonylcarbamoyladenosine t(6)A37 formation in tRNA; Regulation and Cell signaling / Regulation and Cell signaling - no subcategory / Cell envelope-associated LytR-CpsA-Psr transcriptional attenuators / TsaE protein, required for threonylcarbamoyladenosine t(6)A37 formation in tRNA; RNA Metabolism …	Uncharacterized protein	tRNA threonylcarbamoyladenosine modification [GO:0002949]	K06925;	-0.01	-0.24	-0.38	-0.45	0.01	-0.54	-0.22	-0.08	0.765386	0.405695	0.20802	0.999334	0.926441	0.799074	0.925685
SAOUHSC_02284	5	ilvC	CodY	Q2FWK4	Amino Acids and Derivatives / Branched-chain amino acids / Branched-Chain Amino Acid Biosynthesis / Ketol-acid reductoisomerase (EC 1.1.1.86); Cofactors, Vitamins, Prosthetic Groups, Pigments / Coenzyme A / Coenzyme A Biosynthesis / Ketol-acid reductoisomerase (EC 1.1.1.86)	Ketol-acid reductoisomerase (NADP(+)) (KARI) (EC 1.1.1.86) (Acetohydroxy-acid isomeroreductase) (AHIR) (Alpha-keto-beta-hydroxylacyl reductoisomerase) (Ketol-acid reductoisomerase type 1) (Ketol-acid reductoisomerase type I)	isoleucine biosynthetic process [GO:0009097]; valine biosynthetic process [GO:0009099]	K00053;	-0.27	0.08	2.25	2.62	0.27	0.38	2.27	2.44	0.740483	0.00100253	2.4e-05	0.999334	0.6628	0.676451	0.77351
SAOUHSC_02297	29	-	NA	Q2FWJ5	CBSS-393131.3.peg.612 / Transcription accessory protein (S1 RNA-binding domain); Cell division-ribosomal stress proteins cluster / Transcription accessory protein (S1 RNA-binding domain)	S1 RNA binding domain protein	nucleobase-containing compound metabolic process [GO:0006139]	K06959;	-0.03	-0.11	-0.19	-0.24	0.03	-0.09	-0.14	-0.15	0.827637	0.112722	0.0372918	0.999334	0.864621	0.996049	0.910615
SAOUHSC_02298	4	sigB	SigB	Q2FWJ4	Regulation and Cell signaling / Quorum sensing and biofilm formation / Biofilm formation in Staphylococcus / RNA polymerase sigma factor SigB; RNA Metabolism / Transcription / Transcription initiation, bacterial sigma factors / RNA polymerase sigma factor SigB; Stress Response / Stress Response - no subcategory / SigmaB stress responce regulation / RNA polymerase sigma factor SigB	RNA polymerase sigma factor	DNA-templated transcription, initiation [GO:0006352]	K03090;	-0.02	-0.69	-0.63	-1.29	0.02	-0.5	-0.64	-1.38	0.668287	0.000162395	4.1e-06	0.999334	0.656558	0.971036	0.949098
SAOUHSC_02299	8	rsbW	SigB	Q2FWJ3	SigmaB stress responce regulation / Serine-protein kinase RsbW (EC 2.7.11.1)	Serine-protein kinase RsbW (EC 2.7.11.1) (Anti-sigma-B factor) (Sigma-B negative effector RsbW)	negative regulation of transcription, DNA-templated [GO:0045892]	K04757;	-0.01	-0.31	-0.49	-0.84	0.01	-0.24	-0.38	-0.96	0.751387	0.00648475	0.000181498	0.999334	0.990596	0.808333	0.903706
SAOUHSC_02300	6	rsbV	SigB	P60070	SigmaB stress responce regulation / Anti-sigma B factor antagonist RsbV	Anti-sigma-B factor antagonist (Anti-anti-sigma-B factor)	regulation of transcription, DNA-templated [GO:0006355]	K04749;	0.08	-0.49	-0.49	-1.67	-0.08	-0.4	-0.56	-1.22	0.385228	0.000816725	0.000137605	0.999334	0.811573	0.989518	0.415419
SAOUHSC_02305	3	alr	NA	Q9ZAH5	Amino Acids and Derivatives / Alanine, serine, and glycine / Alanine biosynthesis / Alanine racemase (EC 5.1.1.1); Carbohydrates / Central carbohydrate metabolism / Pyruvate Alanine Serine Interconversions / Alanine racemase (EC 5.1.1.1)	Alanine racemase 1 (EC 5.1.1.1)	D-alanine biosynthetic process [GO:0030632]	K01775;	0.12	-0.73	0.71	2	-0.12	-0.41	0.46	1.6	0.589704	0.00433491	0.0840482	0.999334	0.563373	0.971036	0.970543
SAOUHSC_02316	18	cshA	NA	Q2FWH5	ATP-dependent RNA helicases, bacterial / DEAD-box ATP-dependent RNA helicase DeaD (= CshA) (EC 3.6.4.13)	DEAD-box ATP-dependent RNA helicase CshA (EC 3.6.4.13)	RNA secondary structure unwinding [GO:0010501]	K05592;	-0.06	0.75	0.41	-0.14	0.06	0.41	0.35	-0.12	0.821842	0.021387	0.000746058	0.999334	0.678072	0.93157	0.978326
SAOUHSC_02317	12	murF	NA	Q2FWH4	Cell Wall and Capsule / Cell Wall and Capsule - no subcategory / Peptidoglycan Biosynthesis / UDP-N-acetylmuramoylalanyl-D-glutamyl-2,6-diaminopimelate--D-alanyl-D-alanine ligase (EC 6.3.2.10); Cell Wall and Capsule / Cell Wall and Capsule - no subcategory / Peptidoglycan biosynthesis--gjo / UDP-N-acetylmuramoylalanyl-D-glutamyl-2,6-diaminopimelate--D-alanyl-D-alanine ligase (EC 6.3.2.10)	UDP-N-acetylmuramoyl-tripeptide--D-alanyl-D-alanine ligase (EC 6.3.2.10) (D-alanyl-D-alanine-adding enzyme)	cell cycle [GO:0007049]; cell division [GO:0051301]; cell wall organization [GO:0071555]; peptidoglycan biosynthetic process [GO:0009252]; regulation of cell shape [GO:0008360]	K01929;	-0.03	0.1	0.06	0.33	0.03	-0.1	-0.02	0.23	0.692503	0.316853	0.0446426	0.999334	0.546049	0.861577	0.801035
SAOUHSC_02318	12	ddl	NA	Q2FWH3	Cell Wall and Capsule / Cell Wall and Capsule - no subcategory / Peptidoglycan Biosynthesis / D-alanine--D-alanine ligase (EC 6.3.2.4); Cell Wall and Capsule / Cell Wall and Capsule - no subcategory / Peptidoglycan biosynthesis--gjo / D-alanine--D-alanine ligase (EC 6.3.2.4); cell division cluster containing FtsQ / D-alanine--D-alanine ligase (EC 6.3.2.4)	D-alanine--D-alanine ligase (EC 6.3.2.4) (D-Ala-D-Ala ligase) (D-alanylalanine synthetase)	cell wall organization [GO:0071555]; peptidoglycan biosynthetic process [GO:0009252]; regulation of cell shape [GO:0008360]	K01921;	0.02	-0.01	0.09	0.36	-0.02	0.03	-0.13	0.29	0.500621	0.13629	0.00464015	0.999334	0.819131	0.405079	0.69745
SAOUHSC_02323	4	cls2	NA	Q2FWG8	Fatty Acids, Lipids, and Isoprenoids / Phospholipids / Glycerolipid and Glycerophospholipid Metabolism in Bacteria / Cardiolipin synthetase (EC 2.7.8.-)	Cardiolipin synthase (CL synthase) (EC 2.7.8.-)	cardiolipin biosynthetic process [GO:0032049]	K06131;	-0.12	-0.67	-0.53	0.13	0.12	-0.11	-2.56	-0.42	0.0361545	0.0572853	0.00268093	0.999334	0.606855	0.110886	0.858982
SAOUHSC_02327	5	yidC	NA	Q2FWG4	Cell Division Subsystem including YidCD / Inner membrane protein translocase and chaperone YidC, short form OxaI-like	Membrane protein insertase YidC (Foldase YidC) (Membrane integrase YidC) (Membrane protein YidC)		K03217;	0.1	0.34	-0.03	-0.19	-0.1	-0.03	-0.36	-0.71	0.726926	0.0443816	0.0437051	0.999334	0.713703	0.926683	0.730627
SAOUHSC_02337	19	murA1	SigB	Q2FWF4	Cell Wall and Capsule / Cell Wall and Capsule - no subcategory / Peptidoglycan Biosynthesis / UDP-N-acetylglucosamine 1-carboxyvinyltransferase (EC 2.5.1.7); Cell Wall and Capsule / Cell Wall and Capsule - no subcategory / UDP-N-acetylmuramate from Fructose-6-phosphate Biosynthesis / UDP-N-acetylglucosamine 1-carboxyvinyltransferase (EC 2.5.1.7)	UDP-N-acetylglucosamine 1-carboxyvinyltransferase (EC 2.5.1.7) (Enoylpyruvate transferase) (UDP-N-acetylglucosamine enolpyruvyl transferase) (EPT)	cell cycle [GO:0007049]; cell division [GO:0051301]; cell wall organization [GO:0071555]; peptidoglycan biosynthetic process [GO:0009252]; regulation of cell shape [GO:0008360]; UDP-N-acetylgalactosamine biosynthetic process [GO:0019277]	K00790;	0.04	-0.05	-0.17	-0.42	-0.04	-0.21	-0.14	-0.42	0.706388	0.0198949	0.0187989	0.999334	0.758836	0.894727	0.953733
SAOUHSC_02340	4	atpC	NA	Q2FWF1	Respiration / ATP synthases / F0F1-type ATP synthase / ATP synthase epsilon chain (EC 3.6.3.14)	ATP synthase epsilon chain (ATP synthase F1 sector epsilon subunit) (F-ATPase epsilon subunit)	ATP synthesis coupled proton transport [GO:0015986]	K02114;	-0.06	-0.2	0.38	1.01	0.06	-0.25	0.3	0.86	0.794306	0.00411377	0.000553518	0.999334	0.990596	0.99963	0.801035
SAOUHSC_02341	27	atpD	NA	Q2FWF0	Respiration / ATP synthases / F0F1-type ATP synthase / ATP synthase beta chain (EC 3.6.3.14)	ATP synthase subunit beta (EC 3.6.3.14) (ATP synthase F1 sector subunit beta) (F-ATPase subunit beta)	ATP synthesis coupled proton transport [GO:0015986]	K02112;	0.03	0.2	0.03	0.54	-0.03	0.13	-0.19	0.51	0.532078	0.00637595	0.000963519	0.999334	0.854787	0.40959	0.8542
SAOUHSC_02343	9	atpG	NA	Q2FWE9	Respiration / ATP synthases / F0F1-type ATP synthase / ATP synthase gamma chain (EC 3.6.3.14)	ATP synthase gamma chain (ATP synthase F1 sector gamma subunit) (F-ATPase gamma subunit)	plasma membrane ATP synthesis coupled proton transport [GO:0042777]	K02115;	-0.02	0.24	-0.04	0.6	0.02	0.08	-0.12	0.51	0.756271	0.00220113	0.00103791	0.999334	0.58463	0.850847	0.903706
SAOUHSC_02345	17	atpA	NA	Q2FWE8	Respiration / ATP synthases / F0F1-type ATP synthase / ATP synthase alpha chain (EC 3.6.3.14)	ATP synthase subunit alpha (EC 3.6.3.14) (ATP synthase F1 sector subunit alpha) (F-ATPase subunit alpha)	ATP synthesis coupled proton transport [GO:0015986]	K02111;	-0.01	0.28	0.06	0.65	0.01	0.2	-0.07	0.6	0.553171	0.00379652	0.000212577	0.999334	0.719986	0.452072	0.652469
SAOUHSC_02346	5	atpH	NA	Q2FWE7	Respiration / ATP synthases / F0F1-type ATP synthase / ATP synthase delta chain (EC 3.6.3.14)	ATP synthase subunit delta (ATP synthase F(1) sector subunit delta) (F-type ATPase subunit delta) (F-ATPase subunit delta)	ATP synthesis coupled proton transport [GO:0015986]	K02113;	-0.03	0.08	-0.09	0.64	0.03	0.11	-0.01	0.58	0.871207	0.00328621	0.00537622	0.999334	0.980576	0.842522	0.818339
SAOUHSC_02347	5	atpF	NA	Q2G2F8	F0F1-type ATP synthase / ATP synthase F0 sector subunit b (EC 3.6.3.14)	ATP synthase subunit b (ATP synthase F(0) sector subunit b) (ATPase subunit I) (F-type ATPase subunit b) (F-ATPase subunit b)	ATP synthesis coupled proton transport [GO:0015986]	K02109;	0.11	0.19	0.01	0.75	-0.11	0.09	-0.12	0.48	0.863579	0.00587472	0.000164329	0.999334	0.895698	0.971036	0.924306
SAOUHSC_02352	8	mnaA	NA	Q2G2F5	Cell Wall and Capsule / Capsular and extracellular polysacchrides / Sialic Acid Metabolism / UDP-N-acetylglucosamine 2-epimerase (EC 5.1.3.14)	UDP-N-acetylglucosamine 2-epimerase (EC 5.1.3.14)		K01791;	0	0.11	-0.14	-0.02	0	-0.04	-0.32	-0.25	0.509394	0.530421	0.0884465	0.999334	0.989044	0.467931	0.71007
SAOUHSC_02353	7	upp	NA	Q2FWE6	Nucleosides and Nucleotides / Pyrimidines / De Novo Pyrimidine Synthesis / Uracil phosphoribosyltransferase (EC 2.4.2.9); Nucleosides and Nucleotides / Pyrimidines / pyrimidine conversions / Uracil phosphoribosyltransferase (EC 2.4.2.9); LMPTP YwlE cluster / Uracil phosphoribosyltransferase (EC 2.4.2.9)	Uracil phosphoribosyltransferase (EC 2.4.2.9) (UMP pyrophosphorylase) (UPRTase)	pyrimidine nucleobase metabolic process [GO:0006206]; pyrimidine nucleoside salvage [GO:0043097]; UMP salvage [GO:0044206]; uracil salvage [GO:0006223]	K00761;	-0.03	0.02	-0.1	0.04	0.03	0.09	-0.01	0.16	0.966136	0.538906	0.157859	0.999334	0.85595	0.901545	0.94309
SAOUHSC_02354	13	glyA	NA	Q2FWE5	Amino Acids and Derivatives / Alanine, serine, and glycine / Glycine and Serine Utilization / Serine hydroxymethyltransferase (EC 2.1.2.1); Amino Acids and Derivatives / Alanine, serine, and glycine / Glycine Biosynthesis / Serine hydroxymethyltransferase (EC 2.1.2.1); Amino Acids and Derivatives / Alanine, serine, and glycine / Glycine cleavage system / Serine hydroxymethyltransferase (EC 2.1.2.…	Serine hydroxymethyltransferase (SHMT) (Serine methylase) (EC 2.1.2.1)	glycine biosynthetic process from serine [GO:0019264]; tetrahydrofolate interconversion [GO:0035999]	K00600;	-0.04	-0.07	-0.17	0.23	0.04	0.02	-0.13	0.14	0.57343	0.0386555	0.20802	0.999334	0.720693	0.977165	0.851585
SAOUHSC_02356	2	ptpB	NA	Q2FWE3	CBSS-176280.1.peg.1561 / Low molecular weight protein tyrosine phosphatase (EC 3.1.3.48); LMPTP YfkJ cluster / Low molecular weight protein tyrosine phosphatase (EC 3.1.3.48); LMPTP YwlE cluster / Low molecular weight protein tyrosine phosphatase (EC 3.1.3.48)	Low molecular weight protein-tyrosine-phosphatase PtpB (EC 3.1.3.48) (Phosphotyrosine phosphatase B) (PTPase B)		K01104;	0.04	0.03	-0.28	-0.83	-0.04	0.08	-0.98	-1.74	0.457111	0.219903	6.13e-05	0.999334	0.990596	0.836747	0.658988
SAOUHSC_02357	3	-	NA	Q2FWE2	RNA Metabolism / RNA processing and modification / YrdC-YciO / TsaC protein (YrdC-Sua5 domains) required for threonylcarbamoyladenosine t(6)A37 modification in tRNA; RNA Metabolism / RNA processing and modification / YrdC-YciO-Sua5 and associated protein families / TsaC protein (YrdC-Sua5 domains) required for threonylcarbamoyladenosine t(6)A37 modification in tRNA	Threonylcarbamoyl-AMP synthase (TC-AMP synthase) (EC 2.7.7.87) (L-threonylcarbamoyladenylate synthase)	regulation of translational fidelity [GO:0006450]; tRNA threonylcarbamoyladenosine modification [GO:0002949]		-0.11	0.15	0.21	-1.71	0.11	0.21	-0.92	-3.54	0.24728	0.0260748	0.00827296	0.999334	0.990596	0.307811	0.449244
SAOUHSC_02359	9	prfA	NA	Q2FWE0	Protein Metabolism / Protein biosynthesis / Translation termination factors bacterial / Peptide chain release factor 1; Stress Response / Oxidative stress / Glutaredoxins / Peptide chain release factor 1; LMPTP YwlE cluster / Peptide chain release factor 1	Peptide chain release factor 1 (RF-1)		K02835;	0.03	0.24	0.12	-0.13	-0.03	0.16	-0.18	-0.35	0.630679	0.234784	0.00170397	0.999334	0.990596	0.642879	0.701386
SAOUHSC_02360	4	tdk	NA	Q2FWD9	Cofactors, Vitamins, Prosthetic Groups, Pigments / Folate and pterines / Folate Biosynthesis / Thymidine kinase (EC 2.7.1.21); Nucleosides and Nucleotides / Pyrimidines / pyrimidine conversions / Thymidine kinase (EC 2.7.1.21)	Thymidine kinase (EC 2.7.1.21)	DNA biosynthetic process [GO:0071897]; DNA metabolic process [GO:0006259]; thymidine metabolic process [GO:0046104]	K00857;	0.05	0.33	0.1	-0.11	-0.05	0.2	-0.17	-0.46	0.750195	0.0496777	0.218473	0.999334	0.925481	0.623694	0.982857
SAOUHSC_02361	3	rpmE2	NA	Q2FWD8	Protein Metabolism / Protein biosynthesis / Ribosome LSU bacterial / LSU ribosomal protein L31p; Ribosome LSU bacterial / LSU ribosomal protein L31p, zinc-independent	50S ribosomal protein L31 type B	translation [GO:0006412]	K02909;	-0.02	0.3	0.21	-0.17	0.02	0.05	0.03	-0.27	0.448459	0.032468	0.0151463	0.999334	0.327542	0.875937	0.927538
SAOUHSC_02362	17	rho	NA	Q2FWD7	RNA Metabolism / Transcription / Transcription factors bacterial / Transcription termination factor Rho	Transcription termination factor Rho (EC 3.6.4.-) (ATP-dependent helicase Rho)	DNA-templated transcription, termination [GO:0006353]; regulation of transcription, DNA-templated [GO:0006355]	K03628;	0.02	0.59	0.38	0.63	-0.02	0.34	0.34	0.75	0.277459	0.0125454	0.000178375	0.999334	0.383379	0.606565	0.902562
SAOUHSC_02363	17	-	SigB	Q2FWD6	Carbohydrates / Central carbohydrate metabolism / Methylglyoxal Metabolism / Aldehyde dehydrogenase (EC 1.2.1.3); Carbohydrates / Central carbohydrate metabolism / Pyruvate metabolism II: acetyl-CoA, acetogenesis from pyruvate / Aldehyde dehydrogenase (EC 1.2.1.3); Fatty Acids, Lipids, and Isoprenoids / Phospholipids / Glycerolipid and Glycerophospholipid Metabolism in Bacteria / Aldehyde dehydro…	Putative aldehyde dehydrogenase (EC 1.2.1.3)	carotenoid biosynthetic process [GO:0016117]; cellular aldehyde metabolic process [GO:0006081]; pathogenesis [GO:0009405]	K00128;	0.01	-0.83	-0.25	-0.7	-0.01	-0.73	-0.1	-0.59	0.802464	0.000936901	0.00105236	0.999334	0.675533	0.712464	0.871723
SAOUHSC_02364	2	-	NA	Q2FWD5	Transcriptional regulator, HxlR family	Uncharacterized protein	regulation of transcription, DNA-templated [GO:0006355]; transcription, DNA-templated [GO:0006351]		-0.04	-0.18	-0.12	0.43	0.04	0.02	-0.4	0.36	0.559604	0.116422	0.157239	0.999334	0.990596	0.53066	0.983938
SAOUHSC_02365	15	murA2	VraSR	Q2FWD4	Cell Wall and Capsule / Cell Wall and Capsule - no subcategory / Peptidoglycan Biosynthesis / UDP-N-acetylglucosamine 1-carboxyvinyltransferase (EC 2.5.1.7); Cell Wall and Capsule / Cell Wall and Capsule - no subcategory / UDP-N-acetylmuramate from Fructose-6-phosphate Biosynthesis / UDP-N-acetylglucosamine 1-carboxyvinyltransferase (EC 2.5.1.7)	UDP-N-acetylglucosamine 1-carboxyvinyltransferase (EC 2.5.1.7) (Enoylpyruvate transferase) (UDP-N-acetylglucosamine enolpyruvyl transferase) (EPT)	cell cycle [GO:0007049]; cell division [GO:0051301]; cell wall organization [GO:0071555]; peptidoglycan biosynthetic process [GO:0009252]; regulation of cell shape [GO:0008360]; UDP-N-acetylgalactosamine biosynthetic process [GO:0019277]	K00790;	-0.01	-0.08	0.11	0.95	0.01	-0.01	0.16	0.73	0.921887	0.00110226	0.000428161	0.999334	0.990596	0.999421	0.889158
SAOUHSC_02366	13	fbaA	NA	Q2FWD3	Carbohydrates / Central carbohydrate metabolism / Glycolysis and Gluconeogenesis / Fructose-bisphosphate aldolase class II (EC 4.1.2.13); Carbohydrates / One-carbon Metabolism / Formaldehyde assimilation: Ribulose monophosphate pathway / Fructose-bisphosphate aldolase class II (EC 4.1.2.13)	Uncharacterized protein	fructose 1,6-bisphosphate metabolic process [GO:0030388]; glycolytic process [GO:0006096]	K01624;	-0.02	0.24	0.02	0.07	0.02	0.26	0.19	0.09	0.87477	0.207054	0.32298	0.999334	0.966175	0.84977	0.967757
SAOUHSC_02368	19	pyrG	NA	Q2FWD1	Miscellaneous / Miscellaneous - no subcategory / EC 6.3.4.- Ligases that form carbon-nitrogen bonds / CTP synthase (EC 6.3.4.2); Nucleosides and Nucleotides / Pyrimidines / pyrimidine conversions / CTP synthase (EC 6.3.4.2)	CTP synthase (EC 6.3.4.2) (Cytidine 5'-triphosphate synthase) (Cytidine triphosphate synthetase) (CTP synthetase) (CTPS) (UTP--ammonia ligase)	'de novo' CTP biosynthetic process [GO:0044210]; glutamine metabolic process [GO:0006541]	K01937;	0.01	0.14	0.15	-0.19	-0.01	0.12	0.08	-0.25	0.688603	0.0454475	0.0169769	0.999334	0.910797	0.709313	0.978326
SAOUHSC_02369	7	rpoE	NA	Q2FWD0	RNA Metabolism / Transcription / RNA polymerase bacterial / DNA-directed RNA polymerase delta subunit (EC 2.7.7.6)	Probable DNA-directed RNA polymerase subunit delta (RNAP delta factor)	regulation of transcription, DNA-templated [GO:0006355]; transcription, DNA-templated [GO:0006351]	K03048;	-0.07	0.08	-0.03	-0.26	0.07	-0.09	-0.06	-0.32	0.359211	0.0864689	0.00378022	0.999334	0.225769	0.564355	0.727552
SAOUHSC_02370	7	-	NA	Q2FWC9	spermine/spermidine acetyltransferase blt	Uncharacterized protein			-0.06	-0.78	-0.4	-0.68	0.06	-0.15	-0.73	-0.59	0.124447	0.0644619	0.00394587	0.999334	0.326005	0.520283	0.938848
SAOUHSC_02371	3	coaA	NA	Q2FWC7	Cofactors, Vitamins, Prosthetic Groups, Pigments / Coenzyme A / Coenzyme A Biosynthesis / Pantothenate kinase type II, eukaryotic (EC 2.7.1.33)	Type II pantothenate kinase (EC 2.7.1.33) (PanK-II) (Pantothenic acid kinase)	coenzyme A biosynthetic process [GO:0015937]	K09680;	0.03	0.52	0.21	0.77	-0.03	0.2	0.3	0.51	0.661599	0.0203706	0.676357	0.999334	0.649292	0.984443	0.775849
SAOUHSC_02372	2	-	NA	Q2FWC6	Hypothetical protein SAV2131	Uncharacterized protein			0.02	0.28	0.16	0.23	-0.02	0.04	-0.27	0.26	0.397245	0.402444	0.102356	0.999334	0.856432	0.474074	0.903706
SAOUHSC_02373	7	-	CodY	Q2FWC5	Hypothetical protein SAV2132	Uncharacterized protein			0.06	-0.55	-0.45	-0.36	-0.06	-0.65	-0.93	-0.53	0.668287	0.042361	0.0574248	0.999334	0.995088	0.594851	0.936304
SAOUHSC_02374	7	hmrA	CodY	Q2FWC4	HmrA protein involved in methicillin resistance / amidohydrolase of M40 family	Peptidase M20 domain-containing protein 2	metabolic process [GO:0008152]		-0.01	-0.8	-0.42	-0.52	0.01	-0.42	-0.23	-0.37	0.566058	0.00304695	0.149245	0.999334	0.501108	0.497444	0.672956
SAOUHSC_02375	5	luxS	NA	Q2FWC3	Amino Acids and Derivatives / Lysine, threonine, methionine, and cysteine / Methionine Biosynthesis / S-ribosylhomocysteine lyase (EC 4.4.1.21); Amino Acids and Derivatives / Lysine, threonine, methionine, and cysteine / Methionine Degradation / S-ribosylhomocysteine lyase (EC 4.4.1.21); Methionine Biosynthesis / Autoinducer-2 production protein LuxS	S-ribosylhomocysteine lyase (EC 4.4.1.21) (AI-2 synthesis protein) (Autoinducer-2 production protein LuxS)	quorum sensing [GO:0009372]	K07173;	-0.06	-0.26	-0.27	0.31	0.06	-0.23	0.01	0.32	0.619246	0.0401903	0.00154757	0.999334	0.993555	0.702772	0.900145
SAOUHSC_02377	18	pdp	NA	Q2FWC1	Carbohydrates / Monosaccharides / Deoxyribose and Deoxynucleoside Catabolism / Pyrimidine-nucleoside phosphorylase (EC 2.4.2.2); Nucleosides and Nucleotides / Pyrimidines / pyrimidine conversions / Pyrimidine-nucleoside phosphorylase (EC 2.4.2.2)	Pyrimidine-nucleoside phosphorylase (PYNP) (Py-NPase) (EC 2.4.2.2)	pyrimidine nucleobase metabolic process [GO:0006206]; pyrimidine nucleoside metabolic process [GO:0006213]	K00756;	-0.1	0.12	1.47	1.8	0.1	0.21	1.53	1.82	0.949232	1.54e-05	1.19e-06	0.999334	0.990596	0.979206	0.900145
SAOUHSC_02380	4	deoD	NA	Q2FWB8	Carbohydrates / Monosaccharides / Deoxyribose and Deoxynucleoside Catabolism / Purine nucleoside phosphorylase (EC 2.4.2.1); Nucleosides and Nucleotides / Purines / Purine conversions / Purine nucleoside phosphorylase (EC 2.4.2.1); Nucleosides and Nucleotides / Pyrimidines / pyrimidine conversions / Purine nucleoside phosphorylase (EC 2.4.2.1)	Purine nucleoside phosphorylase DeoD-type (PNP) (EC 2.4.2.1)	purine nucleoside metabolic process [GO:0042278]	K03784;	-0.23	-0.1	0.4	0.67	0.23	0.04	0.19	-0.05	0.271609	0.175878	0.635753	0.999334	0.939429	0.520283	0.437044
SAOUHSC_02381	3	dps	PerR , SigB	Q2FWB7	Oxidative stress / DNA protection during starvation protein	Uncharacterized protein	cellular iron ion homeostasis [GO:0006879]; response to stress [GO:0006950]	K04047;	0.09	0.24	-1.08	-1.22	-0.09	0.6	0.25	0.55	0.202167	0.0634677	0.494551	0.999334	0.656558	0.229553	0.286373
SAOUHSC_02382	4	-	SigB	Q2FWB6	Putative DCC type thiol-disulphide oxidoreductase	Uncharacterized protein			-0.19	-1.32	-0.53	2.02	0.19	-0.02	-0.09	2.62	0.22168	0.00128341	3.02e-06	0.999334	0.324689	0.794496	0.981824
SAOUHSC_02383	9	-	NA	Q2FWB5	Hypothetical protein SAV2141	Uncharacterized protein			0.01	-0.12	-0.02	0.12	-0.01	0.09	-0.22	-0.08	0.469005	0.832141	0.126664	0.999334	0.729018	0.702473	0.889158
SAOUHSC_02387	8	-	SigB	Q2FWB1	oxidoreductase ylbE	Uncharacterized protein			0.03	-1.23	-0.54	-1.57	-0.03	-0.79	-0.42	-1.5	0.468071	0.000108088	2.28e-05	0.999334	0.32331	0.794039	0.801035
SAOUHSC_02390	2	-	NA	Q2FWA8	Lytic regulatory protein	Lytic regulatory protein, putative			0.02	-0.19	-2.72	0.59	-0.02	-0.28	-2.48	0.16	0.9978	0.0257184	0.0255445	0.999334	0.990596	0.996049	0.977138
SAOUHSC_02396	8	-	NA	Q2FWA2	Hydrolase (HAD superfamily)	Uncharacterized protein			-0.16	-0.44	-0.13	0.09	0.16	-0.31	0.11	0.15	0.900245	0.0787825	0.0718448	0.999334	0.993555	0.875275	0.889158
SAOUHSC_02399	19	glmS	NA	Q2FWA0	Carbohydrates / One-carbon Metabolism / Formaldehyde assimilation: Ribulose monophosphate pathway / Glucosamine--fructose-6-phosphate aminotransferase [isomerizing] (EC 2.6.1.16); Cell Wall and Capsule / Capsular and extracellular polysacchrides / Sialic Acid Metabolism / Glucosamine--fructose-6-phosphate aminotransferase [isomerizing] (EC 2.6.1.16); Cell Wall and Capsule / Cell Wall and Capsule …	Glutamine--fructose-6-phosphate aminotransferase [isomerizing] (EC 2.6.1.16) (D-fructose-6-phosphate amidotransferase) (GFAT) (Glucosamine-6-phosphate synthase) (Hexosephosphate aminotransferase) (L-glutamine--D-fructose-6-phosphate amidotransferase)	carbohydrate metabolic process [GO:0005975]; fructose 6-phosphate metabolic process [GO:0006002]; protein N-linked glycosylation [GO:0006487]; UDP-N-acetylglucosamine metabolic process [GO:0006047]	K00820;	-0.06	-0.1	-0.24	0.23	0.06	0.24	0.33	0.45	0.660826	0.227675	0.301701	0.999334	0.54684	0.799074	0.979773
SAOUHSC_02402	4	mtlA	SigB	Q2FW97	Carbohydrates / Sugar alcohols / Mannitol Utilization / PTS system, mannitol-specific IIA component	PTS system, mannitol-specific IIa component, putative (EC 2.7.1.69)	phosphoenolpyruvate-dependent sugar phosphotransferase system [GO:0009401]	K02798;	0.04	-0.82	-0.64	-1.59	-0.04	-0.75	-0.27	-1.04	0.438002	0.0031083	0.000241366	0.999334	0.990596	0.842522	0.415419
SAOUHSC_02403	7	mtlD	SigB	Q2FW96	Carbohydrates / Sugar alcohols / Mannitol Utilization / Mannitol-1-phosphate 5-dehydrogenase (EC 1.1.1.17)	Mannitol-1-phosphate 5-dehydrogenase (EC 1.1.1.17)	mannitol catabolic process [GO:0019592]	K00009;	-0.01	-1.04	-0.32	-1.39	0.01	-0.8	-0.14	-0.98	0.706388	0.000279961	0.000672331	0.999334	0.722198	0.857601	0.657427
SAOUHSC_02405	17	glmM	NA	P0C0V7	Sialic Acid Metabolism / Phosphoglucosamine mutase (EC 5.4.2.10) / FemD, factor involved in methicillin resistance; UDP-N-acetylmuramate from Fructose-6-phosphate Biosynthesis / Phosphoglucosamine mutase (EC 5.4.2.10) / FemD, factor involved in methicillin resistance	Phosphoglucosamine mutase (EC 5.4.2.10)	carbohydrate metabolic process [GO:0005975]	K03431;	-0.07	-0.1	-0.28	-0.01	0.07	0.06	-0.23	-0.19	0.101397	0.177252	0.00645774	0.999334	0.898888	0.699562	0.197231
SAOUHSC_02406	9	-	NA	Q2FW93	uncharacterized secreted protein, YBBR Bacillus subtilis homolog	Uncharacterized protein			0.07	-0.25	-0.39	-0.23	-0.07	0	-0.94	-0.59	0.33046	0.216619	0.0301507	0.999334	0.682677	0.54737	0.900145
SAOUHSC_02407	2	cdaA	NA	Q2FW92	Hypothetical protein YbbP, contains nucleotide-binding domain of DisA bacterial checkpoint controller	Diadenylate cyclase (DAC) (EC 2.7.7.85) (Cyclic-di-AMP synthase) (c-di-AMP synthase)	cAMP biosynthetic process [GO:0006171]; second-messenger-mediated signaling [GO:0019932]	K18672;	-0.05	-0.36	-0.28	-0.36	0.05	-0.18	-0.27	-0.09	0.778358	0.316785	0.202291	0.999334	0.855279	0.983471	0.790622
SAOUHSC_02409	3	rocF	NA	Q2FW91	Amino Acids and Derivatives / Arginine; urea cycle, polyamines / Arginine and Ornithine Degradation / Arginase (EC 3.5.3.1)	Arginase (EC 3.5.3.1)	arginine metabolic process [GO:0006525]	K01476;	-0.04	-0.01	2.92	2.1	0.04	0.21	2.75	2.1	0.975429	0.000101349	2.4e-05	0.999334	0.991136	0.907494	0.996537
SAOUHSC_02417	8	-	NA	Q2FW86	Scaffold protein for [4Fe-4S] cluster assembly ApbC, MRP-like	Iron-sulfur cluster carrier protein			0.01	-0.41	-0.25	-0.63	-0.01	-0.06	-0.29	-0.81	0.165423	0.0248121	0.000214857	0.999334	0.279356	0.915363	0.801035
SAOUHSC_02423	22	-	NA	Q2FW81	Cell Wall and Capsule / Cell Wall and Capsule - no subcategory / Peptidoglycan Biosynthesis / N-acetylglucosamine-1-phosphate uridyltransferase eukaryotic (EC 2.7.7.23); Cell Wall and Capsule / Cell Wall and Capsule - no subcategory / UDP-N-acetylmuramate from Fructose-6-phosphate Biosynthesis / N-acetylglucosamine-1-phosphate uridyltransferase eukaryotic (EC 2.7.7.23)	Probable uridylyltransferase SAOUHSC_02423 (EC 2.7.7.-)	metabolic process [GO:0008152]	K11442;	-0.01	0.16	-0.01	0.32	0.01	0.05	0.03	0.27	0.887434	0.0639152	0.0512556	0.999334	0.881487	0.977165	0.8542
SAOUHSC_02425	2	-	NA	Q2FW79	Hypothetical protein SAV2173	UPF0457 protein SAOUHSC_02425			-0.09	-0.24	2.23	2.53	0.09	-0.03	2.29	3.02	0.751394	0.000998521	1.43e-07	0.999334	0.989044	0.702473	0.970543
SAOUHSC_02430	10	htsA	Fur	Q2FW75	Iron acquisition and metabolism / Iron acquisition and metabolism - no subcategory / Heme, hemin uptake and utilization systems in GramPositives / Heme ABC type transporter HtsABC, heme-binding protein; Stress Response / Stress Response - no subcategory / Flavohaemoglobin / Heme ABC type transporter HtsABC, heme-binding protein	ABC transporter periplasmic binding protein, putative		K02016;	-0.12	1.67	0.82	0.58	0.12	1.77	0.98	0.54	0.921908	0.000500983	3.76e-06	0.999334	0.854787	0.993574	0.910615
SAOUHSC_02434	5	-	Fur , SigB	Q2FW72	Iron acquisition and metabolism / Iron acquisition and metabolism - no subcategory / Heme, hemin uptake and utilization systems in GramPositives / Uncharacterized siderophore biosynthesis protein near heme transporter HtsABC; Heme, hemin uptake and utilization systems in GramPositives / Siderophore synthetase superfamily, group B	Uncharacterized protein	siderophore biosynthetic process [GO:0019290]		-0.07	1.46	-0.62	0.8	0.07	1.6	0.87	1.05	0.750195	0.0439271	0.0103444	0.999334	0.989818	0.610959	0.924306
SAOUHSC_02436	6	-	Fur	Q2FW70	Iron acquisition and metabolism / Iron acquisition and metabolism - no subcategory / Heme, hemin uptake and utilization systems in GramPositives / Uncharacterized siderophore biosynthesis protein near heme transporter HtsABC; Heme, hemin uptake and utilization systems in GramPositives / Siderophore synthetase superfamily, group B	Uncharacterized protein	siderophore biosynthetic process [GO:0019290]		-0.25	0.94	0.37	1.09	0.25	0.56	0.43	0.98	0.462372	0.00352973	0.1658	0.999334	0.389384	0.733017	0.467935
SAOUHSC_02441	11	asp23	SigB	Q2FW66	Alkaline shock protein 23	Alkaline shock protein 23			0.06	-0.9	0.01	-0.9	-0.06	-0.5	0.46	-0.23	0.131427	0.00133245	0.00310086	0.999334	0.33811	0.349634	0.163618
SAOUHSC_02443	4	amaP	SigB	Q2FW64	Hypothetical protein SAV2184	Uncharacterized protein			0.06	-1.01	-0.16	-1.36	-0.06	-0.75	0.12	-0.78	0.178695	0.00086233	0.000273195	0.999334	0.374768	0.394454	0.195192
SAOUHSC_02445	6	-	NA	Q2FW62	Bifunctional protein: zinc-containing alcohol dehydrogenase; quinone oxidoreductase ( NADPH:quinone reductase) (EC 1.1.1.-); Similar to arginate lyase	Zinc-type alcohol dehydrogenase-like protein			-0.13	-0.01	0.57	0.47	0.13	0.3	0.52	0.74	0.34598	0.00995577	0.101715	0.999334	0.990596	0.394454	0.997385
SAOUHSC_02447	7	-	NA	Q2G2D7	Broadly distributed proteins not in subsystems / NADP-dependent oxidoreductase YfmJ	Uncharacterized protein		K07119;	0.01	-1	-0.11	-0.32	-0.01	-0.43	0.28	-0.09	0.477537	0.00430199	0.00934145	0.999334	0.324689	0.735302	0.801035
SAOUHSC_02448	3	-	NA	Q2G2D6	cell surface hydrolase (putative)	Uncharacterized protein			0.17	-0.48	-0.06	0.44	-0.17	-0.21	0.17	0.19	0.271266	0.0379987	0.398237	0.999334	0.187759	0.467931	0.891338
SAOUHSC_02456	2	lacR	NA	P0A0Q0	Carbohydrates / Di- and oligosaccharides / Lactose and Galactose Uptake and Utilization / Lactose phosphotransferase system repressor	Lactose phosphotransferase system repressor	lactose metabolic process [GO:0005988]; regulation of transcription, DNA-templated [GO:0006355]; transcription, DNA-templated [GO:0006351]	K02530;	-0.31	0.27	0.14	-2.72	0.31	0.56	-0.46	-1.78	0.45606	0.203213	5.81e-05	0.999334	0.6628	0.339574	0.801035
SAOUHSC_02460	7	-	SigB	Q2FW57	Oxidoreductase, aldo/keto reductase family	Uncharacterized protein			-0.01	-0.24	0.41	0.85	0.01	0.04	0.23	0.82	0.792789	0.00481471	0.00349983	0.999334	0.867569	0.883211	0.931932
SAOUHSC_02461	2	-	CodY	Q2FW56	Virulence, Disease and Defense / Resistance to antibiotics and toxic compounds / Cobalt-zinc-cadmium resistance / Transcriptional regulator, MerR family	Transcriptional regulator, merR family, putative	regulation of transcription, DNA-templated [GO:0006355]		-0.15	-0.55	-0.16	-0.46	0.15	-0.27	0.42	-0.19	0.975429	0.289232	0.201412	0.999334	0.990596	0.945875	0.942892
SAOUHSC_02468	10	budB	NA	Q2FW49	Carbohydrates / Fermentation / Acetoin, butanediol metabolism / Acetolactate synthase, catabolic (EC 2.2.1.6); Carbohydrates / Organic acids / Alpha-acetolactate operon / Acetolactate synthase, catabolic (EC 2.2.1.6); Regulation and Cell signaling / Programmed Cell Death and Toxin-antitoxin Systems / Murein hydrolase regulation and cell death / Acetolactate synthase, catabolic (EC 2.2.1.6)	Acetolactate synthase, putative (EC 2.2.1.6)	butanediol metabolic process [GO:0034077]	K01652;	-0.01	0.96	0.63	1.7	0.01	2.29	1.7	2.33	0.660826	0.0388284	0.000336305	0.999334	0.54684	0.909975	0.987719
SAOUHSC_02477	4	rpsI	NA	Q2FW39	Protein Metabolism / Protein biosynthesis / Ribosome SSU bacterial / SSU ribosomal protein S9p (S16e)	30S ribosomal protein S9	maturation of SSU-rRNA from tricistronic rRNA transcript (SSU-rRNA, 5.8S rRNA, LSU-rRNA) [GO:0000462]; translation [GO:0006412]	K02996;	0.03	0.43	0.34	-0.02	-0.03	0.11	0.48	0.2	0.115755	0.0133231	0.0443242	0.999334	0.427541	0.799074	0.440537
SAOUHSC_02478	8	rplM	NA	Q2FW38	Protein Metabolism / Protein biosynthesis / Ribosome LSU bacterial / LSU ribosomal protein L13p (L13Ae)	50S ribosomal protein L13	translation [GO:0006412]	K02871;	-0.04	0.5	0.39	0.04	0.04	0.16	0.24	-0.24	0.178695	0.00809499	0.01132	0.999334	0.120232	0.801383	0.437044
SAOUHSC_02483	2	cbiO	NA	Q2FW34	Cofactors, Vitamins, Prosthetic Groups, Pigments / Folate and pterines / Folate Biosynthesis / ATPase component of general energizing module of ECF transporters; Membrane Transport / Membrane Transport - no subcategory / ECF class transporters / ATPase component of general energizing module of ECF transporters	Energy-coupling factor transporter ATP-binding protein EcfA1 (ECF transporter A component EcfA1) (EC 3.6.3.-)	transmembrane transport [GO:0055085]	K16786;	-0.04	0.13	-0.05	0.01	0.04	0.16	-1.37	-1.43	0.153167	0.469844	0.00635227	0.999334	0.990596	0.339574	0.307826
SAOUHSC_02484	5	rplQ	NA	Q2FW33	Protein Metabolism / Protein biosynthesis / Ribosome LSU bacterial / LSU ribosomal protein L17p	50S ribosomal protein L17	translation [GO:0006412]	K02879;	0.01	0.49	0.5	-0.23	-0.01	0.28	0.27	-0.31	0.652662	0.0403561	0.0012887	0.999334	0.792648	0.676451	0.970543
SAOUHSC_02485	16	rpoA	NA	Q2FW32	RNA Metabolism / Transcription / RNA polymerase bacterial / DNA-directed RNA polymerase alpha subunit (EC 2.7.7.6)	DNA-directed RNA polymerase subunit alpha (RNAP subunit alpha) (EC 2.7.7.6) (RNA polymerase subunit alpha) (Transcriptase subunit alpha)	DNA-templated transcription, elongation [GO:0006354]	K03040;	0.01	0.39	0.25	0.11	-0.01	0.13	0	0	0.536335	0.0572853	0.367578	0.999334	0.377514	0.859838	0.822237
SAOUHSC_02486	4	rpsK	NA	Q2FW31	Protein Metabolism / Protein biosynthesis / Ribosome SSU bacterial / SSU ribosomal protein S11p (S14e)	30S ribosomal protein S11	maturation of SSU-rRNA from tricistronic rRNA transcript (SSU-rRNA, 5.8S rRNA, LSU-rRNA) [GO:0000462]; ribosomal small subunit assembly [GO:0000028]; translation [GO:0006412]	K02948;	-0.02	0.5	0.33	-0.37	0.02	0.12	0.02	-0.2	0.0535345	0.00386261	0.020692	0.999334	0.180034	0.345968	0.741125
SAOUHSC_02487	10	rpsM	NA	Q2FW30	Protein Metabolism / Protein biosynthesis / Ribosome SSU bacterial / SSU ribosomal protein S13p (S18e)	30S ribosomal protein S13	ribosome biogenesis [GO:0042254]; translation [GO:0006412]	K02952;	0.07	0.55	0.18	-1.01	-0.07	0.17	0.19	-0.64	0.488636	0.00782686	0.00110276	0.999334	0.40819	0.919406	0.997228
SAOUHSC_02489	4	infA	NA	Q2FW28	Protein Metabolism / Protein biosynthesis / Translation initiation factors bacterial / Translation initiation factor 1	Translation initiation factor IF-1		K02518;	0.08	0.25	0.07	-0.42	-0.08	0.03	-0.08	-0.51	0.846567	0.0277306	0.00280969	0.999334	0.85595	0.971036	0.936107
SAOUHSC_02490	15	adk	NA	Q2FW27	Nucleosides and Nucleotides / Purines / Purine conversions / Adenylate kinase (EC 2.7.4.3)	Adenylate kinase (AK) (EC 2.7.4.3) (ATP-AMP transphosphorylase) (ATP:AMP phosphotransferase) (Adenylate monophosphate kinase)	AMP salvage [GO:0044209]	K00939;	-0.02	0.3	0.15	-0.19	0.02	0.03	-0.2	-0.39	0.275938	0.0150363	0.0048275	0.999334	0.252136	0.310163	0.401993
SAOUHSC_02491	3	secY	NA	O08387	Protein translocase subunit SecY	Protein translocase subunit SecY	protein transport [GO:0015031]	K03076;	-0.17	0.2	0.05	0.08	0.17	0.35	-0.21	0.05	0.611205	0.855774	0.415623	0.999334	0.967533	0.606565	0.938848
SAOUHSC_02492	9	rplO	NA	P0A0F8	Protein Metabolism / Protein biosynthesis / Ribosome LSU bacterial / LSU ribosomal protein L15p (L27Ae)	50S ribosomal protein L15	translation [GO:0006412]	K02876;	-0.04	0.39	0.17	-0.21	0.04	0.01	0.12	-0.43	0.562697	0.0761935	0.0255445	0.999334	0.405247	0.799074	0.724917
SAOUHSC_02493	8	rpmD	NA	P0A0G2	Protein Metabolism / Protein biosynthesis / Ribosome LSU bacterial / LSU ribosomal protein L30p (L7e)	50S ribosomal protein L30	translation [GO:0006412]	K02907;	0.04	0.49	0.11	-0.38	-0.04	0.14	0.02	-0.66	0.361714	0.00809499	0.000553518	0.999334	0.328362	0.977274	0.871723
SAOUHSC_02494	15	rpsE	NA	Q2FW23	Protein Metabolism / Protein biosynthesis / Ribosome SSU bacterial / SSU ribosomal protein S5p (S2e); Protein Metabolism / Protein processing and modification / Ribosomal protein S5p acylation / SSU ribosomal protein S5p (S2e)	30S ribosomal protein S5	translation [GO:0006412]	K02988;	0.02	0.41	0.28	-0.31	-0.02	0.14	-0.04	-0.4	0.495137	0.00274318	0.0036845	0.999334	0.489089	0.495144	0.967193
SAOUHSC_02495	6	rplR	NA	Q2FW22	Protein Metabolism / Protein biosynthesis / Ribosome LSU bacterial / LSU ribosomal protein L18p (L5e)	50S ribosomal protein L18	translation [GO:0006412]	K02881;	-0.05	0.34	0.4	0.57	0.05	0.1	-0.04	-0.42	0.225027	0.19301	0.187705	0.999334	0.54684	0.502852	0.223001
SAOUHSC_02496	11	rplF	NA	Q2FW21	Protein Metabolism / Protein biosynthesis / Ribosome LSU bacterial / LSU ribosomal protein L6p (L9e)	50S ribosomal protein L6	cytoplasmic translation [GO:0002181]	K02933;	0.02	0.46	0.31	-0.01	-0.02	0.07	0.16	-0.39	0.268359	0.0182107	0.00645774	0.999334	0.201893	0.810006	0.449244
SAOUHSC_02498	8	rpsH	NA	Q2FW20	Protein Metabolism / Protein biosynthesis / Ribosome SSU bacterial / SSU ribosomal protein S8p (S15Ae)	30S ribosomal protein S8	translation [GO:0006412]	K02994;	0.03	0.29	0.35	-0.02	-0.03	0.12	-0.28	-0.62	0.0841217	0.0550242	0.00461693	0.999334	0.989818	0.115572	0.293534
SAOUHSC_02500	16	rplE	NA	Q2FW18	Protein Metabolism / Protein biosynthesis / Ribosome LSU bacterial / LSU ribosomal protein L5p (L11e)	50S ribosomal protein L5	ribosomal large subunit assembly [GO:0000027]; translation [GO:0006412]	K02931;	-0.01	0.34	0.29	-0.19	0.01	0	0.25	-0.47	0.286684	0.0247845	0.0077298	0.999334	0.256373	0.959037	0.647203
SAOUHSC_02501	2	rplX	NA	Q2FW17	Protein Metabolism / Protein biosynthesis / Ribosome LSU bacterial / LSU ribosomal protein L24p (L26e)	50S ribosomal protein L24	translation [GO:0006412]	K02895;	-0.01	0.36	0.22	-0.26	0.01	0.1	0.23	-0.03	0.442992	0.15593	0.412551	0.999334	0.427541	0.894727	0.938848
SAOUHSC_02502	2	rplN	NA	Q2FW16	Protein Metabolism / Protein biosynthesis / Ribosome LSU bacterial / LSU ribosomal protein L14p (L23e)	50S ribosomal protein L14	translation [GO:0006412]	K02874;	0.04	0.46	0.4	-0.05	-0.04	0.38	-0.05	0.07	0.777331	0.0368823	0.218465	0.999334	0.859012	0.777918	0.967004
SAOUHSC_02503	3	rpsQ	NA	Q2FW15	Protein Metabolism / Protein biosynthesis / Ribosome SSU bacterial / SSU ribosomal protein S17p (S11e)	30S ribosomal protein S17	translation [GO:0006412]	K02961;	0.06	0.55	0.48	-0.31	-0.06	0.14	0.27	-0.28	0.10471	0.00189985	0.00437512	0.999334	0.140802	0.69911	0.858982
SAOUHSC_02504	5	rpmC	NA	Q2FW14	Protein Metabolism / Protein biosynthesis / Ribosome LSU bacterial / LSU ribosomal protein L29p (L35e)	50S ribosomal protein L29	translation [GO:0006412]	K02904;	-0.09	0.59	0.42	-0.25	0.09	0.39	0.28	-0.12	0.323749	0.00399114	0.0260443	0.999334	0.335729	0.605778	0.979773
SAOUHSC_02505	3	rplP	NA	Q2FW13	Protein Metabolism / Protein biosynthesis / Ribosome LSU bacterial / LSU ribosomal protein L16p (L10e)	50S ribosomal protein L16	translation [GO:0006412]	K02878;	0.03	0.29	0.16	0.1	-0.03	-0.08	-0.04	-0.15	0.871207	0.46465	0.922542	0.999334	0.821548	0.735302	0.902562
SAOUHSC_02506	9	rpsC	NA	Q2FW12	Protein Metabolism / Protein biosynthesis / Ribosome SSU bacterial / SSU ribosomal protein S3p (S3e)	30S ribosomal protein S3	cytoplasmic translation [GO:0002181]	K02982;	0	0.43	0.16	-0.25	0	-0.01	0.1	-0.48	0.649896	0.00688534	0.0590871	0.999334	0.489089	0.908207	0.889158
[truncated: 144 more rows]
